# Supplementary material for: Characteristics of Prognostic Programmed Cell Death–Related Long Noncoding RNAs Associated With Immune Infiltration and Therapeutic Responses to Colon Cancer
Source: Front Immunol. 2022 May 31;13:828243. doi: 10.3389/fimmu.2022.828243 (PMC9195301; doi:10.3389/fimmu.2022.828243)
Supplement: Supplementary file 3 [file Table_1.xlsx]

## Sheet: S1
Clinical characteristics of the colon cancer patients used in this study
	TCGA database	External database
Number of patients	436	96
Age in years (median, range)	69 (31–90)	54 (26–84)
Gender (%)
Female	208 (47.7%)	42 (43.8%)
Male	228 (52.3%)	54 (56.3%)
Stage (%)
I	75(17.2%)	10(10.4%)
II	174 (39.9%)	28 (29.2%)
III	125 (28.7%)	32 (33.3%)
IV	62 (14.2%)	26 (27.1%)
T
I	8 (1.8%)	7(7.3%)
II	74 (17.0%)	17(17.7%)
III	299 (68.6%)	49(51.1%)
IV	55(12.6%)	23(23.9%)
M
M0	331 (75.9%)	77(80.2%)
M1	62 (14.2%)	19(19.8%)
MX	43 (9.9%)	NA
N
N0	257 (58.9%)	50(52.1%)
N1	102 (23.4%)	26(27.1%)
N2	77(17.7%)	20(20.8%)
NA: Not applicate

## Sheet: S2
Differential Ferroptosis related genes						Differential apoptosis related genes						Differential pyroptosis related genes
Ferroptosis related genes	lncRNA	cor	pvalue	Regulation		Apoptosis related genes	lncRNA	cor	pvalue	Regulation		Pyroptosis related genes	lncRNA	cor	pvalue	Regulation
ZEB1	AC104083.1	0.925557	8.42576e-201	postive		BCL2L11	AC005479.1	0.430099	1.01661e-22	postive		SCAF11	AC005479.1	0.407667	2.29846e-20	postive
ZEB1	MIR100HG	0.916353	2.3081e-189	postive		BCL2L2	AC005479.1	0.349613	4.80311e-15	postive		CASP6	AL360181.2	-0.327603	2.69727e-13	negative
ZEB1	MAGI2-AS3	0.886465	1.03624e-159	postive		BCL2L11	AC055822.1	0.417399	2.2998e-21	postive		PLCG1	AL360181.2	0.30056	2.48271e-11	postive
ZEB1	LINC00578	0.880537	7.97389e-155	postive		BAD	GAS8-AS1	-0.320593	9.10587e-13	negative		SCAF11	AC055822.1	0.608748	2.69534e-49	postive
ZEB1	AC036108.3	0.866036	6.8378e-144	postive		BCL2L11	GAS8-AS1	0.4477	1.07801e-24	postive		SCAF11	GAS8-AS1	0.484518	3.24749e-29	postive
PTGS2	AC245128.3	0.857559	4.45178e-138	postive		CRADD	AP006621.3	-0.409678	5.68801e-12	negative		CRYAB	LINC02593	0.423659	2.64778e-42	postive
ZEB1	ACTA2-AS1	0.848095	5.13447e-132	postive		BAD	AL139011.1	-0.377272	1.90357e-17	negative		IL1B	AL139011.1	0.375981	2.49408e-17	postive
ZEB1	AC093010.2	0.843708	2.40408e-129	postive		BCL2L11	AL139011.1	0.500434	2.4038e-31	postive		SCAF11	AL139011.1	0.618767	2.54418e-51	postive
HELLS	AC107068.1	0.839321	9.36158e-127	postive		BCL2L12	AL139011.1	-0.349707	4.71733e-15	negative		SCAF11	AC008667.1	0.379167	1.27759e-17	postive
ZEB1	MBNL1-AS1	0.83446	5.64162e-124	postive		BCL2L11	AC008667.1	0.395701	3.51913e-19	postive		IL1B	MIR29B2CHG	0.379567	1.17395e-17	postive
ZEB1	DNM3OS	0.822237	2.28978e-117	postive		BAD	MIR29B2CHG	-0.359418	7.18815e-16	negative		SCAF11	MIR29B2CHG	0.616994	5.8778e-51	postive
ZEB1	HAND2-AS1	0.816137	2.95657e-114	postive		BCL2L11	MIR29B2CHG	0.546637	3.30677e-38	postive		IL1B	AC010999.2	0.532922	4.65007e-36	postive
PTGS2	GK-AS1	0.814291	2.45366e-113	postive		BCL2L12	MIR29B2CHG	-0.365696	2.05703e-16	negative		SCAF11	AC010999.2	0.454421	1.76904e-25	postive
PTGS2	AP001434.1	0.812922	1.16018e-112	postive		BCL2L2	MIR29B2CHG	0.314754	2.44898e-12	postive		IL1B	AC016727.1	0.338592	3.75792e-14	postive
ZEB1	A2M-AS1	0.806247	1.88995e-109	postive		BCL2A1	AC010999.2	0.368632	1.13504e-16	postive		SCAF11	AC016727.1	0.635676	6.55743e-55	postive
HELLS	AL158825.2	0.804854	8.53033e-109	postive		BCL2L11	AC010999.2	0.349397	5.00392e-15	postive		PLCG1	AC116049.1	0.322121	7.00338e-13	postive
PTGS2	GK-IT1	0.80315	5.2999e-108	postive		FAS	LINC00467	0.335893	6.14273e-14	postive		SCAF11	AC005785.1	0.405769	3.56961e-20	postive
ZEB1	ADAMTS9-AS1	0.802185	1.48002e-107	postive		TNFSF10	LINC00467	0.332207	1.19257e-13	postive		IL1B	AC039056.2	0.315501	2.16021e-12	postive
HELLS	AC131971.1	0.800249	1.14093e-106	postive		BAD	AC016727.1	-0.37028	8.10725e-17	negative		SCAF11	AC039056.2	0.479702	1.36344e-28	postive
LOX	LINC01094	0.797945	1.26046e-105	postive		BCL2L11	AC016727.1	0.482769	5.48323e-29	postive		SCAF11	AL391684.1	0.486468	1.80509e-29	postive
HELLS	AC079684.2	0.793837	8.46285e-104	postive		BCL2L12	AC016727.1	-0.377671	1.75055e-17	negative		SCAF11	AC012676.3	0.649522	5.09173e-58	postive
HELLS	AC105339.2	0.790708	1.95473e-102	postive		BCL2L11	AC005785.1	0.318267	1.35377e-12	postive		PLCG1	TMEM147-AS1	0.440228	7.67332e-24	postive
HELLS	AC007390.1	0.789098	9.63681e-102	postive		BCL2L11	AC039056.2	0.451508	3.89136e-25	postive		SCAF11	AC009404.1	0.495196	1.24316e-30	postive
HELLS	AC130650.2	0.787843	3.3094e-101	postive		BAD	AL391684.1	-0.30843	6.98047e-12	negative		IL18	AL138789.1	0.371369	6.48403e-17	postive
PTGS2	LUCAT1	0.786064	1.87366e-100	postive		BAK1	AL391684.1	-0.300751	2.40837e-11	negative		SCAF11	AL358472.3	0.38386	4.70511e-18	postive
ZEB1	CASC15	0.785242	4.152e-100	postive		BCL2L11	AL391684.1	0.373345	4.31441e-17	postive		IL1B	L3MBTL4-AS1	0.412294	7.7667e-21	postive
ZEB1	MIR99AHG	0.784272	1.05726e-99	postive		BCL2L11	AL352984.1	0.301769	2.04813e-11	postive		SCAF11	L3MBTL4-AS1	0.624983	1.29356e-52	postive
HELLS	AC078795.1	0.78224	7.3747e-99	postive		RIPK1	ZFAS1	-0.324596	4.56337e-13	negative		GSDMD	AC010245.2	-0.339669	3.08454e-14	negative
HELLS	AC005726.2	0.779852	7.03603e-98	postive		BAD	AC012676.3	-0.321528	7.75528e-13	negative		SCAF11	AC010245.2	0.610964	9.74876e-50	postive
ZEB1	AL132642.1	0.777722	5.13709e-97	postive		BCL2L11	AC012676.3	0.395745	3.48498e-19	postive		SCAF11	AC067838.1	0.365171	2.28653e-16	postive
ZEB1	AP001528.1	0.777686	5.31434e-97	postive		BCL2L12	AC012676.3	-0.315073	2.32124e-12	negative		SCAF11	AC011899.3	0.400906	1.08851e-19	postive
PTGS2	LINC02656	0.775063	5.95993e-96	postive		FAS	TMEM147-AS1	-0.307215	8.51171e-12	negative		TNF	A1BG-AS1	0.307182	8.55784e-12	postive
HELLS	ZNF346-IT1	0.774822	7.43166e-96	postive		BAD	AC009404.1	-0.309584	5.77609e-12	negative		IL1B	AC105429.1	0.447471	1.1456e-24	postive
PTGS2	AP006259.1	0.772845	4.49194e-95	postive		BCL2L11	AC009404.1	0.351232	3.52606e-15	postive		SCAF11	AC105429.1	0.652789	8.89577e-59	postive
HELLS	AC009318.2	0.77231	7.28454e-95	postive		BCL2L2	AC009404.1	0.307321	8.36571e-12	postive		NOD2	AC145207.8	0.301731	2.06034e-11	postive
ZEB1	AC104825.1	0.771085	2.19432e-94	postive		FAS	AL354892.2	-0.301255	2.2228e-11	negative		PLCG1	AC145207.8	0.381383	7.988e-18	postive
HELLS	AL355488.1	0.770311	4.3864e-94	postive		BCL2L11	AL358472.3	0.411252	9.93099e-21	postive		SCAF11	AC145207.8	0.327817	2.59781e-13	postive
HELLS	AC006064.2	0.767402	5.79186e-93	postive		BAD	L3MBTL4-AS1	-0.321036	8.4393e-13	negative		IL1B	AC092436.3	0.310031	5.3665e-12	postive
HELLS	EIF1AX-AS1	0.766822	9.64197e-93	postive		BCL2A1	L3MBTL4-AS1	0.423728	4.94174e-22	postive		SCAF11	AC092436.3	0.57257	1.49896e-42	postive
HELLS	AC011933.2	0.76551	3.03903e-92	postive		BCL2L11	L3MBTL4-AS1	0.446654	1.42322e-24	postive		GSDMD	TIMM23B-AGAP6	-0.315127	2.30039e-12	negative
HELLS	AC006059.1	0.765082	4.41273e-92	postive		BCL2L12	L3MBTL4-AS1	-0.343704	1.46191e-14	negative		IL1B	TIMM23B-AGAP6	0.426026	2.80463e-22	postive
HELLS	AL365356.1	0.76307	2.52065e-91	postive		FAS	L3MBTL4-AS1	0.30434	1.35614e-11	postive		SCAF11	TIMM23B-AGAP6	0.714597	4.12888e-75	postive
HELLS	AC132192.1	0.76302	2.63185e-91	postive		BAD	AC010245.2	-0.343527	1.51085e-14	negative		SCAF11	AC093752.2	0.650523	2.99019e-58	postive
HELLS	AL138759.1	0.762787	3.21691e-91	postive		BCL2L11	AC010245.2	0.398009	2.0972e-19	postive		IL1B	AL110115.1	0.379208	1.26647e-17	postive
HELLS	AC099811.1	0.762421	4.4042e-91	postive		BCL2L12	AC010245.2	-0.334668	7.66554e-14	negative		SCAF11	AL110115.1	0.665485	8.19868e-62	postive
ZEB1	AC007362.1	0.762098	5.81091e-91	postive		TNFRSF10B	AC067838.1	0.339137	3.4006e-14	postive		SCAF11	CRTC3-AS1	0.640617	5.31314e-56	postive
HELLS	AP001429.1	0.761287	1.164e-90	postive		BCL2L11	AC011899.3	0.417694	2.14254e-21	postive		IL1B	AL513327.2	0.379421	1.21075e-17	postive
HELLS	AL022311.1	0.760471	2.33308e-90	postive		BCL2	A1BG-AS1	0.304357	1.35239e-11	postive		SCAF11	AL513327.2	0.572565	1.50222e-42	postive
HELLS	AL731566.2	0.759976	3.55366e-90	postive		BMF	A1BG-AS1	0.338282	3.97689e-14	postive		IL1B	AC025280.1	0.685333	7.1884e-67	postive
HELLS	AC021078.1	0.759934	3.68194e-90	postive		BAD	AC105429.1	-0.362216	4.12948e-16	negative		SCAF11	AC025280.1	0.544401	7.52125e-38	postive
HELLS	GSTCD-AS1	0.759746	4.31731e-90	postive		BCL2L11	AC105429.1	0.533199	4.21689e-36	postive		IL1B	AC005070.3	0.414358	4.75978e-21	postive
HELLS	AL390961.2	0.759708	4.4578e-90	postive		BCL2L12	AC105429.1	-0.34761	7.0226e-15	negative		SCAF11	AC005070.3	0.744808	8.73367e-85	postive
ZEB1	AC025917.1	0.759511	5.26954e-90	postive		BCL2L12	AC009902.2	0.349348	5.05131e-15	postive		SCAF11	AC104984.3	0.667969	2.00464e-62	postive
HELLS	AC020900.1	0.758644	1.09604e-89	postive		BAD	AC092436.3	-0.382947	5.72157e-18	negative		PYCARD	Z84492.1	0.303805	1.47818e-11	postive
HELLS	INO80-AS1	0.758142	1.67311e-89	postive		BCL2L11	AC092436.3	0.435446	2.62696e-23	postive		SCAF11	AC021851.1	0.652157	1.24892e-58	postive
HELLS	AL132989.2	0.757846	2.14515e-89	postive		BCL2L12	AC092436.3	-0.346009	9.49614e-15	negative		IL1B	AP005899.1	0.490439	5.39484e-30	postive
HELLS	AC125257.1	0.757539	2.77666e-89	postive		BAD	TIMM23B-AGAP6	-0.425584	3.12866e-22	negative		SCAF11	AP005899.1	0.577304	2.19148e-43	postive
ZEB1	RAP2C-AS1	0.756215	8.39412e-89	postive		BCL2L11	TIMM23B-AGAP6	0.511052	7.8685e-33	postive		SCAF11	AC125603.1	0.308193	7.25544e-12	postive
PTGS2	AC011352.3	0.755934	1.0609e-88	postive		BCL2L12	TIMM23B-AGAP6	-0.367225	1.51036e-16	negative		CASP6	FGD5-AS1	0.396306	3.07367e-19	postive
ZEB1	DUBR	0.754828	2.65651e-88	postive		BAD	AC093752.2	-0.348825	5.57939e-15	negative		SCAF11	FGD5-AS1	0.36269	3.75763e-16	postive
HELLS	SCAT2	0.75437	3.88009e-88	postive		BCL2L11	AC093752.2	0.463442	1.46732e-26	postive		GSDMD	AC022306.3	-0.304152	1.39793e-11	negative
ZEB1	BNC2-AS1	0.754031	5.13195e-88	postive		BCL2L12	AC093752.2	-0.338714	3.67439e-14	negative		SCAF11	AC022306.3	0.551994	4.4993e-39	postive
ZEB1	ZNF667-AS1	0.75377	6.36142e-88	postive		BAD	AL110115.1	-0.355098	1.67339e-15	negative		TNF	SLC12A5-AS1	0.36066	5.62435e-16	postive
ZEB1	AL158163.1	0.752923	1.27642e-87	postive		BCL2L11	AL110115.1	0.517793	8.42473e-34	postive		GSDMD	AL359076.1	-0.300741	2.41213e-11	negative
HELLS	AC020978.7	0.752719	1.50887e-87	postive		BCL2L12	AL110115.1	-0.335471	6.62977e-14	negative		IL1B	AL359076.1	0.355695	1.48993e-15	postive
HELLS	AC243773.2	0.752461	1.86359e-87	postive		BAD	CRTC3-AS1	-0.329776	1.83809e-13	negative		SCAF11	AL359076.1	0.685486	6.54764e-67	postive
HELLS	AC069542.1	0.751717	3.42277e-87	postive		BCL2L11	CRTC3-AS1	0.424209	4.39003e-22	postive		PLCG1	AP003419.3	0.302118	1.93702e-11	postive
HELLS	AL133243.3	0.751018	6.04389e-87	postive		BCL2L12	CRTC3-AS1	-0.353583	2.24385e-15	negative		SCAF11	AP006545.1	0.418576	1.73234e-21	postive
HELLS	AP000487.1	0.750306	1.07662e-86	postive		TNFRSF1A	CRTC3-AS1	-0.312539	3.54417e-12	negative		SCAF11	AC005089.1	0.400114	1.30321e-19	postive
HELLS	AC008026.3	0.750215	1.15914e-86	postive		BAD	AL513327.2	-0.327771	2.6191e-13	negative		SCAF11	AC090578.2	0.344431	1.27646e-14	postive
HELLS	AL596247.1	0.74987	1.53231e-86	postive		BCL2L11	AL513327.2	0.526239	4.77452e-35	postive		SCAF11	AC074135.1	0.339789	3.01685e-14	postive
PTGS2	MIR3945HG	0.749305	2.41899e-86	postive		BCL2L12	AL513327.2	-0.320411	9.39357e-13	negative		GSDMD	AC005261.3	-0.366578	1.7217e-16	negative
HELLS	AC010226.1	0.749189	2.65445e-86	postive		BCL2L2	AL513327.2	0.332095	1.21672e-13	postive		SCAF11	AC005261.3	0.430536	9.11021e-23	postive
ZEB1	Z99289.2	0.748888	3.38224e-86	postive		BCL2A1	AC025280.1	0.479246	1.56007e-28	postive		IL1B	AC064801.1	0.40142	9.68468e-20	postive
HELLS	ATP1B3-AS1	0.748514	4.57022e-86	postive		BCL2L11	AC025280.1	0.444124	2.77454e-24	postive		SCAF11	AC064801.1	0.595315	1.08461e-46	postive
HELLS	ST7-OT4	0.748072	6.51426e-86	postive		BAD	AC005070.3	-0.382683	6.05352e-18	negative		PLCG1	FAM83C-AS1	0.406629	2.92513e-20	postive
HELLS	SMYD3-IT1	0.74805	6.62872e-86	postive		BCL2L11	AC005070.3	0.485453	2.45153e-29	postive		GSDMD	AC084125.4	0.493619	2.02741e-30	postive
LOX	LINC01614	0.747653	9.11146e-86	postive		BCL2L12	AC005070.3	-0.357713	1.00494e-15	negative		IL1B	MPRIP-AS1	0.47875	1.80534e-28	postive
HELLS	AC092828.1	0.747291	1.21703e-85	postive		BAD	AC104984.3	-0.342775	1.73769e-14	negative		SCAF11	MPRIP-AS1	0.592498	3.68175e-46	postive
HELLS	AC244093.4	0.746722	1.9148e-85	postive		BCL2L11	AC104984.3	0.464929	9.66662e-27	postive		IL1B	PSMD6-AS2	0.303038	1.67181e-11	postive
HELLS	USP3-AS1	0.745893	3.70149e-85	postive		BCL2L12	AC104984.3	-0.332771	1.07802e-13	negative		SCAF11	PSMD6-AS2	0.70676	8.36826e-73	postive
HELLS	AC110813.1	0.744761	9.06339e-85	postive		BAD	AC021851.1	-0.303983	1.4364e-11	negative		IL1B	MAGI2-AS3	0.585072	8.71803e-45	postive
HELLS	LINC00624	0.744733	9.26805e-85	postive		BCL2L11	AC021851.1	0.411964	8.39555e-21	postive		SCAF11	MAGI2-AS3	0.606617	7.11386e-49	postive
HELLS	AL157938.3	0.744574	1.05e-84	postive		TNFRSF1A	AC021851.1	-0.302463	1.83307e-11	negative		SCAF11	AL390961.2	0.685821	5.33565e-67	postive
HELLS	AC087588.2	0.744479	1.13189e-84	postive		BAD	AP005899.1	-0.331101	1.45281e-13	negative		SCAF11	AL022157.1	0.61367	2.78531e-50	postive
HELLS	AC007216.3	0.743936	1.7351e-84	postive		BCL2A1	AP005899.1	0.373786	3.93783e-17	postive		IL1B	AP002026.1	0.304876	1.24375e-11	postive
PTGS2	AL353593.2	0.743876	1.81961e-84	postive		BCL2L11	AP005899.1	0.550644	7.46405e-39	postive		SCAF11	AP002026.1	0.580686	5.4414e-44	postive
HELLS	AC124283.3	0.743825	1.89339e-84	postive		BCL2	AL357054.4	0.356115	1.37307e-15	postive		SCAF11	AL122010.1	0.323971	5.08644e-13	postive
HELLS	AC109587.1	0.743572	2.31031e-84	postive		CSE1L	FGD5-AS1	0.365949	1.95478e-16	postive		PLCG1	ZNRD2-AS1	0.329294	2.00208e-13	postive
HELLS	AP000786.1	0.743261	2.94694e-84	postive		BAD	AC022306.3	-0.320171	9.7878e-13	negative		IL1B	HMGA2-AS1	0.56717	1.29448e-41	postive
HELLS	AC007622.2	0.743242	2.99161e-84	postive		BCL2L12	AC022306.3	-0.303116	1.6511e-11	negative		SCAF11	HMGA2-AS1	0.668749	1.28489e-62	postive
HELLS	SCARNA9	0.743065	3.43802e-84	postive		BCL2A1	SLC12A5-AS1	0.358106	9.30393e-16	postive		SCAF11	FAM78B-AS1	0.483669	4.18946e-29	postive
HELLS	AP000866.6	0.74246	5.5134e-84	postive		BCL2L2	VASH1-AS1	0.358383	8.81169e-16	postive		IL1B	AL589743.5	0.429854	1.08112e-22	postive
HELLS	AC078778.1	0.742432	5.63629e-84	postive		BAD	AL359076.1	-0.389295	1.45003e-18	negative		SCAF11	AL589743.5	0.458512	5.77348e-26	postive
HELLS	AL359922.2	0.741948	8.21902e-84	postive		BCL2L11	AL359076.1	0.521627	2.31254e-34	postive		PLCG1	AFDN-DT	0.471713	1.40147e-27	postive
ZEB1	ZBTB20-AS5	0.74184	8.94461e-84	postive		BCL2L12	AL359076.1	-0.406651	2.91017e-20	negative		PLCG1	AC114488.1	0.354699	1.808e-15	postive
HELLS	AC090948.1	0.741355	1.30402e-83	postive		BCL2L2	AL359076.1	0.326771	3.12157e-13	postive		SCAF11	AL031666.1	0.645784	3.64919e-57	postive
HELLS	LINC01572	0.74133	1.32906e-83	postive		BAD	AC005089.1	-0.300525	2.4963e-11	negative		GSDMD	AC004492.1	-0.313833	2.85699e-12	negative
HELLS	AC018557.2	0.741211	1.45837e-83	postive		BCL2L11	AC005089.1	0.327599	2.69953e-13	postive		IL1B	AC004492.1	0.421688	8.14121e-22	postive
HELLS	AC020978.3	0.740987	1.73494e-83	postive		BMF	AL662844.4	0.31643	1.84757e-12	postive		SCAF11	AC004492.1	0.74089	1.86944e-83	postive
HELLS	AC009704.2	0.74047	2.58833e-83	postive		BAK1	AC005261.3	-0.348955	5.44308e-15	negative		IL1B	AL731563.4	0.347955	6.57889e-15	postive
HELLS	CARNMT1-AS1	0.740451	2.6277e-83	postive		BID	AC005261.3	-0.302671	1.77316e-11	negative		SCAF11	AL731563.4	0.639135	1.13437e-55	postive
PTGS2	AC104462.2	0.739823	4.26801e-83	postive		BAD	AC064801.1	-0.317985	1.42025e-12	negative		SCAF11	LINC01106	0.314313	2.6365e-12	postive
HELLS	AC007823.1	0.739604	5.05065e-83	postive		BCL2A1	AC064801.1	0.316616	1.79044e-12	postive		SCAF11	AC116914.1	0.354598	1.84373e-15	postive
PTGS2	AL035530.2	0.739364	6.07508e-83	postive		BCL2L11	AC064801.1	0.543832	9.26522e-38	postive		SCAF11	NCK1-DT	0.413345	3.09947e-12	postive
HELLS	AC083806.2	0.7392	6.89582e-83	postive		BCL2L12	AC064801.1	-0.307353	8.32287e-12	negative		SCAF11	AL589745.1	0.340688	2.55687e-14	postive
ZEB1	LAMC1-AS1	0.738968	8.23935e-83	postive		BCL2L1	FAM83C-AS1	0.300091	2.67447e-11	postive		IL1B	AL139023.1	0.333755	9.03515e-14	postive
HELLS	AC073651.1	0.738606	1.08758e-82	postive		CSE1L	FAM83C-AS1	0.341536	2.18637e-14	postive		SCAF11	MROCKI	0.320898	8.64075e-13	postive
HELLS	PAXBP1-AS1	0.73859	1.10153e-82	postive		BCL2L12	AC084125.4	0.307496	8.13067e-12	postive		IL1B	AC025857.2	0.58221	2.88813e-44	postive
HELLS	AC084824.5	0.738407	1.26704e-82	postive		BAD	MPRIP-AS1	-0.360867	5.39784e-16	negative		SCAF11	AC025857.2	0.538617	6.12961e-37	postive
HELLS	AC025031.3	0.738333	1.34107e-82	postive		BCL2A1	MPRIP-AS1	0.336527	5.47503e-14	postive		IL1B	PTPRG-AS1	0.390547	1.10205e-18	postive
HELLS	MCM3AP-AS1	0.738147	1.54557e-82	postive		BCL2L11	MPRIP-AS1	0.497804	5.50388e-31	postive		SCAF11	PTPRG-AS1	0.643763	1.04675e-56	postive
ZEB1	AL356599.1	0.737769	2.06403e-82	postive		BCL2L12	MPRIP-AS1	-0.34642	8.78912e-15	negative		IL1B	LINC01614	0.341156	2.34524e-14	postive
HELLS	AL590723.1	0.737722	2.13979e-82	postive		BCL2L2	AC254562.3	0.346062	9.40236e-15	postive		IL1B	AP001107.4	0.371169	6.75707e-17	postive
HELLS	AC105339.3	0.737282	2.99376e-82	postive		BAD	PSMD6-AS2	-0.399197	1.60404e-19	negative		SCAF11	AP001107.4	0.48641	1.83712e-29	postive
HELLS	AC022211.2	0.73707	3.51866e-82	postive		BCL2L11	PSMD6-AS2	0.548688	1.5473e-38	postive		PYCARD	AC137630.3	0.412085	8.15886e-21	postive
HELLS	AC024940.6	0.736805	4.30397e-82	postive		BCL2L12	PSMD6-AS2	-0.383291	5.31516e-18	negative		SCAF11	AC137630.3	-0.316629	1.78646e-12	negative
HELLS	AC025031.4	0.736788	4.35819e-82	postive		BCL2L2	PSMD6-AS2	0.318902	1.21523e-12	postive		SCAF11	AC027020.2	0.301515	2.13268e-11	postive
HELLS	PABPC4-AS1	0.736761	4.44979e-82	postive		BAD	MAGI2-AS3	-0.334757	7.54355e-14	negative		PLCG1	AL359881.2	0.521541	2.38113e-34	postive
HELLS	AC008543.1	0.736602	5.02082e-82	postive		BCL2	MAGI2-AS3	0.328584	2.26946e-13	postive		SCAF11	LINC00861	0.566404	1.75234e-41	postive
ZEB1	AC108463.3	0.735527	1.13431e-81	postive		BCL2A1	MAGI2-AS3	0.480508	1.07418e-28	postive		TNF	AC022706.1	0.389666	1.337e-18	postive
ZEB1	AP005131.7	0.735526	1.13479e-81	postive		BCL2L11	MAGI2-AS3	0.515769	1.65666e-33	postive		SCAF11	LINC02569	0.431402	7.32631e-23	postive
HELLS	PLS1-AS1	0.735457	1.19557e-81	postive		BCL2L12	MAGI2-AS3	-0.38216	6.76894e-18	negative		SCAF11	AL121782.1	0.543186	1.17291e-37	postive
ZEB1	CARMN	0.735421	1.22919e-81	postive		BAD	AL390961.2	-0.358743	8.20981e-16	negative		CASP1	USP30-AS1	0.495351	1.18446e-30	postive
HELLS	AC040904.1	0.735052	1.62412e-81	postive		BCL2L11	AL390961.2	0.47277	1.03335e-27	postive		GSDMD	USP30-AS1	0.397258	2.48286e-19	postive
HELLS	AL133243.2	0.734984	1.70866e-81	postive		BCL2L12	AL390961.2	-0.339592	3.12808e-14	negative		IL1B	AC015853.1	0.404312	4.99476e-20	postive
HELLS	AC021851.1	0.734689	2.13487e-81	postive		BAD	AL022157.1	-0.330034	1.75614e-13	negative		SCAF11	AC015853.1	0.456573	9.83548e-26	postive
HELLS	CNOT10-AS1	0.734417	2.6198e-81	postive		BCL2L11	AL022157.1	0.331661	1.3146e-13	postive		SCAF11	AL390066.2	0.332805	1.07143e-13	postive
HELLS	AC112512.1	0.734212	3.05586e-81	postive		BCL2L12	AL022157.1	-0.31025	5.17704e-12	negative		IL1B	AC020663.3	0.45503	1.49913e-25	postive
ZEB1	AC048341.1	0.733603	4.8277e-81	postive		BAD	AP002026.1	-0.305708	1.08717e-11	negative		SCAF11	AC020663.3	0.637943	2.08151e-55	postive
HELLS	THOC7-AS1	0.733533	5.08647e-81	postive		BCL2	AP002026.1	0.303155	1.64071e-11	postive		SCAF11	AC079414.3	0.377043	1.9971e-17	postive
HELLS	AC005261.1	0.732915	8.08053e-81	postive		BCL2L11	AP002026.1	0.401263	1.00367e-19	postive		GSDMD	AL732314.8	0.305087	1.2021e-11	postive
HELLS	AC087521.2	0.732802	8.79229e-81	postive		BCL2L12	AP002026.1	-0.335383	6.73694e-14	negative		IL1B	AC007362.1	0.534202	2.95889e-36	postive
CP	AC008514.1	0.732634	9.9617e-81	postive		BCL2L11	AL122010.1	0.305359	1.1504e-11	postive		SCAF11	AC007362.1	0.650609	2.85523e-58	postive
HELLS	AC008937.3	0.732384	1.20047e-80	postive		BCL2L2	AL122010.1	0.376234	2.3657e-17	postive		PLCG1	AL117379.1	0.396319	3.06517e-19	postive
HELLS	AC127164.1	0.732289	1.28881e-80	postive		BAD	HMGA2-AS1	-0.360037	6.36202e-16	negative		SCAF11	AL117379.1	0.486583	1.74374e-29	postive
HELLS	AC016831.4	0.732243	1.33381e-80	postive		BCL2A1	HMGA2-AS1	0.408761	1.78115e-20	postive		IL1B	AC007431.2	0.412746	6.9786e-21	postive
HELLS	ACSL3-AS1	0.731982	1.61964e-80	postive		BCL2L11	HMGA2-AS1	0.52291	1.4944e-34	postive		SCAF11	AC007431.2	0.572454	1.57113e-42	postive
HELLS	AC109992.2	0.731796	1.86073e-80	postive		BCL2L12	HMGA2-AS1	-0.356084	1.38131e-15	negative		IL1B	SCARNA9	0.426549	2.46396e-22	postive
HELLS	AC007014.2	0.731771	1.89552e-80	postive		BAD	FAM78B-AS1	-0.30675	9.18021e-12	negative		SCAF11	SCARNA9	0.710363	7.4445e-74	postive
ZEB1	AC026401.1	0.731757	1.91535e-80	postive		BCL2L11	FAM78B-AS1	0.441766	5.14356e-24	postive		IL1B	AC016949.1	0.405737	3.59548e-20	postive
ZEB1	LPP-AS1	0.731751	1.92361e-80	postive		BCL2L12	FAM78B-AS1	-0.329134	2.05952e-13	negative		SCAF11	AC016949.1	0.720444	6.9739e-77	postive
HELLS	AC093484.4	0.731583	2.17995e-80	postive		BCL2L11	AL589743.5	0.339527	3.16554e-14	postive		IL1B	AC078778.1	0.30633	9.82856e-12	postive
HELLS	AC068025.2	0.731457	2.39252e-80	postive		TNFRSF1A	AL513123.1	-0.321573	7.69535e-13	negative		SCAF11	AC078778.1	0.715309	2.52709e-75	postive
HELLS	AL033397.2	0.731163	2.97547e-80	postive		BAK1	AFDN-DT	-0.3166	1.79531e-12	negative		IL1B	AC015987.1	0.407041	2.65849e-20	postive
HELLS	AP002907.1	0.731026	3.29317e-80	postive		BCL2L1	AFDN-DT	0.302437	1.84073e-11	postive		SCAF11	AC015987.1	0.698055	2.49458e-70	postive
ZEB1	AC109587.1	0.730973	3.42507e-80	postive		FAS	AFDN-DT	-0.300622	2.45824e-11	negative		SCAF11	AC009704.2	0.706878	7.7344e-73	postive
HELLS	PRC1-AS1	0.730084	6.60986e-80	postive		BAD	AL031666.1	-0.344683	1.21765e-14	negative		IL1B	AC099811.5	0.454365	1.79632e-25	postive
HELLS	Z82217.1	0.730024	6.90677e-80	postive		BCL2L11	AL031666.1	0.447083	1.27021e-24	postive		SCAF11	AC099811.5	0.700431	5.37726e-71	postive
HELLS	AL158207.2	0.729151	1.31332e-79	postive		BCL2L12	AL031666.1	-0.331174	1.4339e-13	negative		IL1B	Z99289.2	0.49892	3.8761e-31	postive
HELLS	AC009095.1	0.728972	1.49794e-79	postive		BAD	AC004492.1	-0.40119	1.02059e-19	negative		SCAF11	Z99289.2	0.61265	4.47191e-50	postive
ZEB1	AC087286.2	0.72887	1.61429e-79	postive		BCL2L11	AC004492.1	0.528952	1.86649e-35	postive		GSDMD	THAP9-AS1	-0.375716	2.63608e-17	negative
HELLS	AC113143.1	0.728821	1.67429e-79	postive		BCL2L12	AC004492.1	-0.383945	4.62007e-18	negative		PYCARD	THAP9-AS1	-0.348112	6.38601e-15	negative
HELLS	AC010976.1	0.728717	1.80684e-79	postive		BAD	AL731563.4	-0.343906	1.40782e-14	negative		SCAF11	THAP9-AS1	0.544987	6.06738e-38	postive
ZEB1	AC009269.5	0.728075	2.89042e-79	postive		BCL2L11	AL731563.4	0.492643	2.74019e-30	postive		IL1B	AC074032.1	0.350345	4.17753e-15	postive
ZEB1	ENTPD1-AS1	0.727937	3.19623e-79	postive		BCL2L12	AL731563.4	-0.330158	1.71773e-13	negative		SCAF11	AC074032.1	0.676862	1.15746e-64	postive
ZEB1	Z99289.3	0.72674	7.65059e-79	postive		BCL2L11	AC097381.3	0.33385	8.88298e-14	postive		SCAF11	TMED2-DT	0.324433	4.69392e-13	postive
HELLS	AC079915.1	0.726673	8.03134e-79	postive		TNFRSF1A	LINC01106	-0.305764	1.0774e-11	negative		IL1B	AL109761.1	0.301866	2.01641e-11	postive
HELLS	AL049539.1	0.726376	9.9621e-79	postive		BCL2L11	AC116914.1	0.375709	2.64e-17	postive		SCAF11	AL109761.1	0.611069	9.28849e-50	postive
HELLS	AP001893.1	0.725996	1.31281e-78	postive		CASP10	AC116914.1	0.316219	1.91431e-12	postive		SCAF11	PRANCR	0.41266	7.12235e-21	postive
LOX	AP001434.1	0.725953	1.35384e-78	postive		CASP7	AL139246.3	0.336705	5.30115e-14	postive		IL1B	AC107081.2	0.397618	2.29002e-19	postive
HELLS	AC004492.1	0.725771	1.54462e-78	postive		TNFSF10	NCK1-DT	0.33035	1.6603e-13	postive		SCAF11	AC107081.2	0.613699	2.74754e-50	postive
HELLS	ZNF451-AS1	0.725622	1.72017e-78	postive		BCL2A1	AL139023.1	0.420485	1.09112e-21	postive		PYCARD	AC012306.2	0.341269	2.29689e-14	postive
ZEB1	AC007319.1	0.72529	2.1871e-78	postive		BAD	AC025857.2	-0.302525	1.81493e-11	negative		SCAF11	AC012306.2	-0.375292	2.87965e-17	negative
HELLS	AC058791.1	0.725286	2.19353e-78	postive		BCL2A1	AC025857.2	0.430505	9.18063e-23	postive		SCAF11	PABPC4-AS1	0.718197	3.3876e-76	postive
HELLS	AP001001.1	0.725151	2.41806e-78	postive		BCL2L11	AC025857.2	0.398343	1.94488e-19	postive		SCAF11	LINC02701	0.324962	4.28188e-13	postive
HELLS	AC015849.3	0.724951	2.79377e-78	postive		BCL2L12	AC025857.2	-0.30798	7.51333e-12	negative		PLCG1	AC040162.3	0.421406	8.7193e-22	postive
ZEB1	KLF7-IT1	0.724948	2.79912e-78	postive		BAD	PTPRG-AS1	-0.350725	3.8848e-15	negative		SCAF11	HCFC1-AS1	0.486956	1.55737e-29	postive
ZEB1	AC009754.1	0.724911	2.87517e-78	postive		BCL2L11	PTPRG-AS1	0.446511	1.47793e-24	postive		PLCG1	AL121906.2	0.490339	5.56175e-30	postive
HELLS	CDC42-IT1	0.724786	3.14515e-78	postive		BCL2A1	LINC01614	0.516297	1.38953e-33	postive		PLCG1	AC005253.1	0.364355	2.69326e-16	postive
HELLS	AC005070.3	0.72456	3.7022e-78	postive		BAD	AP001107.4	-0.334471	7.9419e-14	negative		SCAF11	AC005253.1	0.431749	6.71326e-23	postive
HELLS	ST7-AS2	0.724087	5.20152e-78	postive		BCL2L11	AP001107.4	0.485303	2.56546e-29	postive		SCAF11	AC006042.1	0.369101	1.03153e-16	postive
ZEB1	AP005131.1	0.7237	6.86804e-78	postive		BCL2L2	AP001107.4	0.360405	5.91488e-16	postive		SCAF11	AC007038.1	0.648979	6.78781e-58	postive
ZEB1	AC004988.1	0.723574	7.51324e-78	postive		BID	AC137630.3	0.323175	5.8379e-13	postive		SCAF11	AC068724.2	0.430242	9.8069e-23	postive
ZEB1	AC138207.4	0.723385	8.60754e-78	postive		BCL2A1	AL356417.2	0.400723	1.13478e-19	postive		SCAF11	AL358072.1	0.526307	4.66459e-35	postive
HELLS	AC005632.3	0.722905	1.2134e-77	postive		BCL2L11	AL356417.2	0.330269	1.68422e-13	postive		IL1B	AC073611.1	0.362092	4.23243e-16	postive
HELLS	AC105429.1	0.722834	1.27599e-77	postive		BMF	AL356417.2	0.313884	2.83274e-12	postive		SCAF11	AL109804.1	0.355613	1.51387e-15	postive
HELLS	AL133260.2	0.722833	1.277e-77	postive		BCL2L1	AL359881.2	0.305836	1.06488e-11	postive		IL1B	AL354892.3	0.343169	1.61507e-14	postive
ZEB1	Z97989.1	0.722394	1.74729e-77	postive		BAD	LINC00861	-0.327819	2.59688e-13	negative		SCAF11	AL354892.3	0.610363	1.28564e-49	postive
PTGS2	ITPRIP-AS1	0.722177	2.03901e-77	postive		BCL2	LINC00861	0.36992	8.72798e-17	postive		SCAF11	AL929236.1	0.558453	3.86967e-40	postive
HELLS	AC098869.2	0.722151	2.07772e-77	postive		BCL2L11	LINC00861	0.522996	1.45129e-34	postive		PLCG1	MHENCR	0.441816	5.07655e-24	postive
HELLS	AC002558.2	0.722093	2.16408e-77	postive		BCL2L12	LINC00861	-0.337139	4.89889e-14	negative		IL1B	AC022973.5	0.549414	1.18125e-38	postive
HELLS	AC012360.1	0.72195	2.39599e-77	postive		BCL2	AC022706.1	0.386362	2.74427e-18	postive		SCAF11	AC022973.5	0.641939	2.69055e-56	postive
HELLS	AC053513.2	0.721939	2.41553e-77	postive		BCL2A1	AC022706.1	0.342505	1.82706e-14	postive		IL1B	AC009093.4	0.357739	9.99801e-16	postive
ZEB1	AL356124.1	0.72183	2.61063e-77	postive		FAS	AC022706.1	0.343795	1.43716e-14	postive		PLCG1	AL121894.2	0.336183	5.82746e-14	postive
HELLS	AC016949.1	0.721523	3.24791e-77	postive		TNFSF10	AC022706.1	0.300003	2.71178e-11	postive		CASP6	AL135999.3	0.309742	5.62849e-12	postive
HELLS	AC004832.4	0.721451	3.41718e-77	postive		BCL2L12	LINC02569	-0.322007	7.14137e-13	negative		IL1B	AC008026.3	0.412346	7.67118e-21	postive
LOX	MYOSLID	0.72138	3.59322e-77	postive		BAD	AL121782.1	-0.333576	9.33107e-14	negative		SCAF11	AC008026.3	0.701875	2.1008e-71	postive
HELLS	AC005034.4	0.72132	3.74964e-77	postive		BCL2L11	AL121782.1	0.352588	2.71814e-15	postive		IL1B	AC020594.1	0.385771	3.11801e-18	postive
ZEB1	AC018926.3	0.721143	4.25252e-77	postive		BAK1	USP30-AS1	0.567048	1.35872e-41	postive		SCAF11	AC020594.1	0.449876	6.0315e-25	postive
PTGS2	AC087286.2	0.721002	4.69906e-77	postive		CASP10	USP30-AS1	0.480948	9.42617e-29	postive		IL1B	AL133260.2	0.39959	1.46756e-19	postive
ZEB1	AC060766.7	0.720891	5.08145e-77	postive		FAS	USP30-AS1	0.328154	2.44838e-13	postive		SCAF11	AL133260.2	0.687312	2.13948e-67	postive
HELLS	LAMTOR5-AS1	0.72079	5.46186e-77	postive		TNFSF10	USP30-AS1	0.352259	2.89514e-15	postive		IL1B	AC002044.1	0.347589	7.05118e-15	postive
HELLS	AP002336.2	0.720713	5.76684e-77	postive		BCL2L11	AC015853.1	0.388308	1.7985e-18	postive		SCAF11	AC002044.1	0.554454	1.77826e-39	postive
HELLS	PLCG1-AS1	0.720525	6.58636e-77	postive		BCL2L11	AL390066.2	0.396979	2.64363e-19	postive		SCAF11	TERC	0.364014	2.88414e-16	postive
HELLS	AC099811.5	0.720362	7.38824e-77	postive		BCL2L2	AL390066.2	0.344487	1.26309e-14	postive		SCAF11	AP000845.1	0.364898	2.41552e-16	postive
ZEB1	SOS1-IT1	0.720262	7.93118e-77	postive		BAD	AC020663.3	-0.375527	2.74233e-17	negative		SCAF11	AC006213.5	0.514346	2.65734e-33	postive
PTGS2	BX322234.1	0.720252	7.98808e-77	postive		BCL2A1	AC020663.3	0.325091	4.18685e-13	postive		IL1B	AC011503.2	0.444832	2.3032e-24	postive
HELLS	MIR133A1HG	0.720243	8.03874e-77	postive		BCL2L11	AC020663.3	0.527786	2.79735e-35	postive		SCAF11	AC011503.2	0.39197	8.05841e-19	postive
HELLS	AL354726.1	0.720153	8.56437e-77	postive		BCL2L12	AC020663.3	-0.335098	7.09308e-14	negative		SCAF11	AL133297.1	0.381275	8.17336e-18	postive
HELLS	AL080317.2	0.720047	9.23335e-77	postive		BAD	AC007362.1	-0.348149	6.34186e-15	negative		PLCG1	AC023090.1	-0.306156	1.01114e-11	negative
ZEB1	AC011472.4	0.719147	1.74051e-76	postive		BCL2A1	AC007362.1	0.373446	4.22507e-17	postive		SCAF11	AC023090.1	0.326979	3.00975e-13	postive
HELLS	AC134407.1	0.718355	3.0341e-76	postive		BCL2L11	AC007362.1	0.514536	2.4953e-33	postive		SCAF11	AL355802.3	0.316352	1.87211e-12	postive
HELLS	ZRANB2-AS1	0.718143	3.51924e-76	postive		BCL2L12	AC007362.1	-0.325336	4.01158e-13	negative		SCAF11	SPRY4-AS1	0.385731	3.14501e-18	postive
HELLS	SEMA6A-AS1	0.718081	3.67518e-76	postive		BCL2L11	AL117379.1	0.377173	1.94346e-17	postive		IL1B	AC007406.3	0.40194	8.60124e-20	postive
HELLS	LINC-PINT	0.717871	4.25465e-76	postive		BAD	AC007431.2	-0.321375	7.96154e-13	negative		PLCG1	LINC00174	0.400387	1.22485e-19	postive
HELLS	AC022150.4	0.717812	4.43416e-76	postive		BCL2L11	AC007431.2	0.52894	1.87465e-35	postive		SCAF11	AL139081.1	0.522828	1.53672e-34	postive
ZEB1	AC110792.3	0.716745	9.33501e-76	postive		BCL2L12	AC007431.2	-0.308997	6.36089e-12	negative		SCAF11	LINC01355	0.689135	6.94108e-68	postive
HELLS	AC009754.1	0.716688	9.70757e-76	postive		BAD	SCARNA9	-0.396719	2.80197e-19	negative		IL1B	PITRM1-AS1	0.353955	2.0881e-15	postive
HELLS	ALMS1-IT1	0.716637	1.00614e-75	postive		BCL2A1	SCARNA9	0.318681	1.26194e-12	postive		SCAF11	PITRM1-AS1	0.682192	4.82703e-66	postive
ZEB1	AC087854.1	0.715921	1.65418e-75	postive		BCL2L11	SCARNA9	0.449547	6.5867e-25	postive		IL1B	AL033397.1	0.329622	1.88906e-13	postive
HELLS	AC004594.1	0.715654	1.99037e-75	postive		BCL2L12	SCARNA9	-0.377727	1.7301e-17	negative		SCAF11	AL033397.1	0.311604	4.13922e-12	postive
HELLS	AC145146.1	0.715642	2.00641e-75	postive		BAD	AC016949.1	-0.388096	1.88347e-18	negative		SCAF11	VIM-AS1	0.30424	1.37827e-11	postive
HELLS	AC016831.1	0.715526	2.17375e-75	postive		BCL2L11	AC016949.1	0.490809	4.81595e-30	postive		SCAF11	AL021707.2	0.480272	1.15174e-28	postive
HELLS	AC008114.1	0.715426	2.33068e-75	postive		BCL2L12	AC016949.1	-0.349126	5.26887e-15	negative		IL1B	AC020978.3	0.358483	8.64047e-16	postive
HELLS	MIRLET7A1HG	0.71541	2.35531e-75	postive		BAD	AC078778.1	-0.373542	4.14211e-17	negative		SCAF11	AC020978.3	0.692034	1.1395e-68	postive
HELLS	Z98885.3	0.714864	3.43627e-75	postive		BCL2L11	AC078778.1	0.499009	3.76882e-31	postive		GSDMD	CHKB-DT	0.373622	4.07364e-17	postive
HELLS	SOS1-IT1	0.714604	4.10889e-75	postive		BCL2L12	AC078778.1	-0.348519	5.91297e-15	negative		IL1B	CARMN	0.344344	1.2972e-14	postive
ZEB1	AC004832.4	0.714377	4.80647e-75	postive		BAD	AC015987.1	-0.35482	1.76589e-15	negative		SCAF11	CARMN	0.616504	7.40038e-51	postive
ZEB1	EGOT	0.714297	5.07872e-75	postive		BCL2L11	AC015987.1	0.448088	9.7244e-25	postive		IL1B	STXBP5-AS1	0.343779	1.44145e-14	postive
HELLS	RASA2-IT1	0.714213	5.38106e-75	postive		BCL2L12	AC015987.1	-0.364337	2.70326e-16	negative		SCAF11	STXBP5-AS1	0.474029	7.17784e-28	postive
HELLS	AC011405.1	0.71398	6.31486e-75	postive		BAD	AC009704.2	-0.374733	3.23495e-17	negative		GSDMD	AC125257.1	-0.32409	4.98203e-13	negative
HELLS	AC007216.2	0.713624	8.06342e-75	postive		BCL2L11	AC009704.2	0.501717	1.60041e-31	postive		SCAF11	AC125257.1	0.657924	5.48588e-60	postive
HELLS	AL020995.1	0.713558	8.43752e-75	postive		BCL2L12	AC009704.2	-0.320336	9.51448e-13	negative		IL1B	AC012464.2	0.377407	1.8507e-17	postive
HELLS	AF117829.1	0.713533	8.58165e-75	postive		BAD	AC099811.5	-0.379701	1.14127e-17	negative		SCAF11	AC012464.2	0.62386	2.22716e-52	postive
PTGS2	AL139147.1	0.712546	1.6874e-74	postive		BCL2A1	AC099811.5	0.330607	1.58604e-13	postive		SCAF11	AC004066.1	0.392624	6.97423e-19	postive
ZEB1	EDIL3-DT	0.712206	2.12813e-74	postive		BCL2L11	AC099811.5	0.551407	5.60831e-39	postive		SCAF11	AC006960.4	0.462763	1.77469e-26	postive
HELLS	AL035071.2	0.711983	2.47658e-74	postive		BCL2L12	AC099811.5	-0.355656	1.50139e-15	negative		PLCG1	AL513320.1	0.350465	4.08266e-15	postive
HELLS	GTF3C2-AS1	0.711972	2.49507e-74	postive		BAD	Z99289.2	-0.325663	3.78948e-13	negative		IL1B	AC005757.1	0.416711	2.71301e-21	postive
HELLS	AC109597.2	0.711925	2.57766e-74	postive		BCL2A1	Z99289.2	0.33449	7.91484e-14	postive		SCAF11	AC005757.1	0.656769	1.03128e-59	postive
HELLS	RERE-AS1	0.711593	3.23092e-74	postive		BCL2L11	Z99289.2	0.445014	2.1954e-24	postive		IL1B	AC083900.1	0.305818	1.06803e-11	postive
HELLS	AC025034.1	0.71059	6.38064e-74	postive		BCL2L11	THAP9-AS1	0.420453	1.09956e-21	postive		SCAF11	AC083900.1	0.541294	2.33361e-37	postive
HELLS	AL592435.1	0.71024	8.08897e-74	postive		TNFRSF1A	THAP9-AS1	-0.328051	2.49324e-13	negative		SCAF11	AC139887.2	0.549203	1.2777e-38	postive
HELLS	AC108063.1	0.710151	8.59344e-74	postive		BCL2L11	AC074032.1	0.448638	8.39676e-25	postive		GSDMD	AL021707.5	0.398098	2.05559e-19	postive
HELLS	MYB-AS1	0.710022	9.37222e-74	postive		BCL2L12	AC074032.1	-0.332632	1.10522e-13	negative		IL1B	AC011676.2	0.455799	1.21523e-25	postive
PTGS2	BNC2-AS1	0.709912	1.00966e-73	postive		BCL2L11	TMED2-DT	0.31013	5.27994e-12	postive		SCAF11	AC011676.2	0.614975	1.51524e-50	postive
HELLS	RSF1-IT1	0.709718	1.15063e-73	postive		BAD	AL109761.1	-0.327391	2.79992e-13	negative		IL1B	NARF-IT1	0.463852	1.30809e-26	postive
PTGS2	AC011595.1	0.708871	2.03642e-73	postive		BCL2L11	AL109761.1	0.536536	1.2912e-36	postive		SCAF11	NARF-IT1	0.640769	4.91341e-56	postive
ZEB1	AC016747.1	0.708818	2.11025e-73	postive		BCL2L12	AL109761.1	-0.313985	2.78529e-12	negative		SCAF11	SEMA6A-AS1	0.665399	8.60385e-62	postive
HELLS	ENTPD1-AS1	0.708682	2.31202e-73	postive		BCL2L11	PRANCR	0.37593	2.52077e-17	postive		PLCG1	AL354836.1	0.482278	6.34849e-29	postive
ZEB1	AC096741.1	0.708445	2.71104e-73	postive		BAD	AC107081.2	-0.308102	7.36426e-12	negative		IL1B	AC104109.4	0.465159	9.06007e-27	postive
HELLS	AC100774.1	0.708406	2.7831e-73	postive		BCL2A1	AC107081.2	0.3108	4.72758e-12	postive		SCAF11	AC104109.4	0.697175	4.38672e-70	postive
HELLS	AC084824.6	0.708142	3.32273e-73	postive		BCL2L11	AC107081.2	0.439771	8.63865e-24	postive		GSDMD	TNFRSF10A-AS1	-0.306947	8.89169e-12	negative
HELLS	AL391834.1	0.708133	3.34203e-73	postive		BAD	PABPC4-AS1	-0.3682	1.23928e-16	negative		PYCARD	TNFRSF10A-AS1	-0.362534	3.87625e-16	negative
HELLS	AC022079.1	0.708026	3.59127e-73	postive		BCL2L11	PABPC4-AS1	0.480106	1.21001e-28	postive		SCAF11	TNFRSF10A-AS1	0.619198	2.07373e-51	postive
HELLS	AC211433.1	0.70801	3.63109e-73	postive		BCL2L12	PABPC4-AS1	-0.331772	1.28897e-13	negative		SCAF11	AC018695.3	0.467063	5.28965e-27	postive
ZEB1	AL358216.1	0.707791	4.20437e-73	postive		BCL2L11	LINC02701	0.337559	4.53808e-14	postive		IL1B	AL022311.1	0.366994	1.58276e-16	postive
ZEB1	AC019080.1	0.707646	4.63144e-73	postive		BCL2L11	HCFC1-AS1	0.380999	8.66643e-18	postive		SCAF11	AL022311.1	0.655308	2.28331e-59	postive
HELLS	MAGI1-IT1	0.707507	5.08136e-73	postive		BCL2L12	HCFC1-AS1	-0.319043	1.18647e-12	negative		PYCARD	AC009065.3	0.460608	3.23367e-26	postive
HELLS	AL080317.1	0.707355	5.62587e-73	postive		CSE1L	AL121906.2	0.346498	8.66242e-15	postive		SCAF11	AC009065.3	-0.409055	1.66269e-20	negative
HELLS	AL031667.3	0.707197	6.25279e-73	postive		BCL2L11	AC010542.1	0.400365	1.23089e-19	postive		IL1B	LRP1-AS	0.448537	8.62735e-25	postive
HELLS	TH2LCRR	0.706791	8.19793e-73	postive		BAD	AC005253.1	-0.302145	1.92864e-11	negative		SCAF11	LRP1-AS	0.60245	4.64703e-48	postive
HELLS	AC100821.2	0.70672	8.594e-73	postive		BCL2L11	AC005253.1	0.40384	5.56666e-20	postive		IL1B	AC025917.1	0.512994	4.15473e-33	postive
HELLS	AC010422.4	0.706677	8.84668e-73	postive		BCL2L11	AC006042.1	0.304102	1.4091e-11	postive		SCAF11	AC025917.1	0.698246	2.20608e-70	postive
HELLS	AC004241.3	0.706644	9.04036e-73	postive		BCL2L12	AC006042.1	-0.308558	6.83504e-12	negative		SCAF11	AC008124.1	0.644313	7.86431e-57	postive
HELLS	AC096741.1	0.706625	9.1597e-73	postive		BAD	AC007038.1	-0.333216	9.95298e-14	negative		GSDMD	AL391121.1	0.331116	1.44886e-13	postive
ZEB1	LINC00641	0.706372	1.08399e-72	postive		BCL2L11	AC007038.1	0.394378	4.72622e-19	postive		IL1B	VAC14-AS1	0.30443	1.33671e-11	postive
HELLS	LINC00630	0.706201	1.2139e-72	postive		BCL2L11	AL358072.1	0.340654	2.57306e-14	postive		SCAF11	VAC14-AS1	0.561391	1.24499e-40	postive
HELLS	ACAP2-IT1	0.705573	1.84238e-72	postive		BCL2A1	AC073611.1	0.405729	3.60269e-20	postive		SCAF11	AC016831.4	0.706594	9.34809e-73	postive
ZEB1	AC004492.1	0.70543	2.02536e-72	postive		BCL2L11	AL109804.1	0.311729	4.05444e-12	postive		IL1B	AC100774.1	0.481347	8.37447e-29	postive
HELLS	AC092794.1	0.705191	2.37347e-72	postive		BAD	AL354892.3	-0.336414	5.58891e-14	negative		SCAF11	AC100774.1	0.695494	1.28256e-69	postive
PTGS2	AC112496.1	0.705013	2.67008e-72	postive		BCL2L11	AL354892.3	0.444478	2.52775e-24	postive		SCAF11	AC020658.4	0.420663	1.0449e-21	postive
HELLS	AC078962.2	0.704877	2.92136e-72	postive		BAD	AL929236.1	-0.318838	1.22855e-12	negative		IL1B	AC009159.3	0.446521	1.47425e-24	postive
HELLS	KCNQ1OT1	0.704538	3.65585e-72	postive		BCL2L11	AL929236.1	0.390273	1.17041e-18	postive		SCAF11	AC009159.3	0.412149	8.03588e-21	postive
LOX	LINC00578	0.704377	4.06455e-72	postive		CSE1L	MHENCR	0.304641	1.29181e-11	postive		IL1B	GABPB1-AS1	0.30031	2.58307e-11	postive
ZEB1	AP001001.1	0.704369	4.08567e-72	postive		FAS	MHENCR	-0.361169	5.08425e-16	negative		SCAF11	GABPB1-AS1	0.564501	3.70355e-41	postive
HELLS	AL122035.2	0.704013	5.16887e-72	postive		BAD	AC022973.5	-0.339606	3.12008e-14	negative		SCAF11	AC012173.1	0.364167	2.79692e-16	postive
ZEB1	AC079915.1	0.703291	8.30631e-72	postive		BCL2A1	AC022973.5	0.388533	1.71236e-18	postive		IL1B	PHC2-AS1	0.344768	1.19851e-14	postive
ZEB1	AC026356.1	0.703269	8.42911e-72	postive		BCL2L11	AC022973.5	0.462744	1.78371e-26	postive		SCAF11	PHC2-AS1	0.575122	5.33715e-43	postive
HELLS	ERCC8-AS1	0.703267	8.44156e-72	postive		BCL2L12	AC022973.5	-0.304819	1.2553e-11	negative		SCAF11	INTS6-AS1	0.432001	6.30003e-23	postive
HELLS	MIR222HG	0.703203	8.80411e-72	postive		BAD	AC008026.3	-0.379855	1.10457e-17	negative		SCAF11	AC138028.2	0.369215	1.00789e-16	postive
PTGS2	AC114760.2	0.703012	9.98015e-72	postive		BCL2L11	AC008026.3	0.503055	1.04492e-31	postive		IL1B	NARF-AS1	0.356251	1.33711e-15	postive
ZEB1	ST7-AS2	0.702731	1.20002e-71	postive		BCL2L12	AC008026.3	-0.348476	5.96047e-15	negative		SCAF11	NARF-AS1	0.474334	6.56917e-28	postive
ZEB1	DHDDS-AS1	0.702719	1.20915e-71	postive		BCL2L11	AC020594.1	0.436477	2.01793e-23	postive		SCAF11	AC005014.2	0.301615	2.09884e-11	postive
LOX	RNF144A-AS1	0.702631	1.28123e-71	postive		BAD	AL133260.2	-0.366338	1.80713e-16	negative		SCAF11	GRPEL2-AS1	0.530429	1.11554e-35	postive
HELLS	AC090739.1	0.702587	1.31821e-71	postive		BCL2L11	AL133260.2	0.500679	2.22387e-31	postive		NLRP6	LINC01511	0.384834	3.81673e-18	postive
ZEB1	AC090825.1	0.702388	1.50144e-71	postive		BCL2L12	AL133260.2	-0.338766	3.63986e-14	negative		IL1B	AC010655.2	0.333558	9.36051e-14	postive
ZEB1	KIF26B-AS1	0.702365	1.52462e-71	postive		BCL2L11	AC002044.1	0.43663	1.94035e-23	postive		SCAF11	AC010655.2	0.592384	3.86684e-46	postive
HELLS	AL358115.1	0.702186	1.71385e-71	postive		BCL2L11	AP000845.1	0.349384	5.0172e-15	postive		SCAF11	AC092757.3	0.38301	5.64501e-18	postive
HELLS	AC093535.1	0.701917	2.04286e-71	postive		BCL2L11	AC006213.5	0.346135	9.27482e-15	postive		SCAF11	AC007128.1	0.509163	1.45819e-32	postive
HELLS	MIR17HG	0.701697	2.35981e-71	postive		BCL2	AC068870.2	0.347175	7.62451e-15	postive		SCAF11	AC092681.2	0.646021	3.22345e-57	postive
PTGS2	AC007278.1	0.701588	2.53317e-71	postive		BCL2L11	AC068870.2	0.311419	4.26816e-12	postive		SCAF11	PCAT1	0.439245	9.89899e-24	postive
HELLS	AL512656.2	0.701542	2.60999e-71	postive		BCL2L1	LINC01273	0.320575	9.13383e-13	postive		PLCG1	AC139256.3	0.322859	6.16606e-13	postive
HELLS	Z98884.2	0.701213	3.23385e-71	postive		BCL2A1	AC011503.2	0.339135	3.40168e-14	postive		IL1B	AC108727.1	0.472282	1.18971e-27	postive
HELLS	TIMM23B-AGAP6	0.700871	4.04102e-71	postive		BCL2L11	AL133297.1	0.428812	1.40298e-22	postive		SCAF11	AC108727.1	0.643859	9.95983e-57	postive
ZEB1	AP002812.3	0.700778	4.29085e-71	postive		BCL2L11	SPRY4-AS1	0.352611	2.70584e-15	postive		SCAF11	AC120053.1	0.493506	2.09918e-30	postive
PTGS2	ADAMTSL4-AS1	0.700699	4.51956e-71	postive		BCL2A1	AC007406.3	0.397271	2.47575e-19	postive		SCAF11	SNHG3	0.326481	3.28446e-13	postive
HELLS	LINC01355	0.700614	4.77377e-71	postive		BCL2L11	AC007406.3	0.30229	1.8846e-11	postive		IL1B	CEP250-AS1	0.352678	2.67137e-15	postive
HELLS	AP000873.2	0.700409	5.45466e-71	postive		BCL2L11	AL139081.1	0.337494	4.59202e-14	postive		SCAF11	CEP250-AS1	0.678967	3.32826e-65	postive
HELLS	AL031775.2	0.70025	6.04878e-71	postive		BAD	LINC01355	-0.365147	2.29725e-16	negative		SCAF11	AC012186.2	0.476705	3.29165e-28	postive
PTGS2	AP000919.1	0.700149	6.45519e-71	postive		BCL2L11	LINC01355	0.45586	1.19514e-25	postive		PYCARD	LINC01023	0.365518	2.13235e-16	postive
HELLS	AL355075.2	0.700133	6.52519e-71	postive		BCL2L12	LINC01355	-0.346542	8.59043e-15	negative		SCAF11	LINC01023	-0.342252	1.91497e-14	negative
ZEB1	SAP30L-AS1	0.700099	6.66971e-71	postive		TNFRSF1A	LINC01355	-0.311627	4.12365e-12	negative		IL1B	HECW2-AS1	0.48193	7.04016e-29	postive
ZEB1	LINC00702	0.700097	6.67817e-71	postive		BAK1	AC005498.3	-0.317514	1.53818e-12	negative		SCAF11	HECW2-AS1	0.565045	2.99205e-41	postive
HELLS	PSMD6-AS2	0.70007	6.79716e-71	postive		BAD	PITRM1-AS1	-0.338246	4.00335e-14	negative		IL1B	BX322234.1	0.734286	2.89229e-81	postive
HELLS	AC007285.2	0.699957	7.30985e-71	postive		BCL2L11	PITRM1-AS1	0.528716	2.02645e-35	postive		SCAF11	BX322234.1	0.406176	3.24851e-20	postive
HELLS	AC016405.1	0.699383	1.0601e-70	postive		BCL2L12	PITRM1-AS1	-0.333625	9.24833e-14	negative		SCAF11	AC015660.2	0.38207	6.90004e-18	postive
HELLS	AC074032.1	0.699311	1.11082e-70	postive		BCL2A1	VIM-AS1	0.354567	1.85476e-15	postive		SCAF11	AC024451.4	0.489006	8.35812e-30	postive
ZEB1	AC022001.2	0.69897	1.38422e-70	postive		BCL2L11	VIM-AS1	0.35095	3.72122e-15	postive		CASP6	AC011899.2	-0.304664	1.28715e-11	negative
HELLS	AL022097.1	0.698809	1.53491e-70	postive		BAD	AL021707.2	-0.348967	5.43064e-15	negative		SCAF11	AC100791.3	0.475044	5.3443e-28	postive
ZEB1	AC107021.1	0.698807	1.53719e-70	postive		BCL2L11	AL021707.2	0.41913	1.515e-21	postive		IL1B	AC107021.1	0.657477	7.00441e-60	postive
ZEB1	SNHG14	0.698711	1.63509e-70	postive		BCL2L12	AL021707.2	-0.326354	3.35794e-13	negative		SCAF11	AC107021.1	0.658854	3.29192e-60	postive
HELLS	AL158163.1	0.698612	1.7428e-70	postive		BCL2L2	AL021707.2	0.339199	3.36189e-14	postive		IL1B	AL031432.3	0.379356	1.22749e-17	postive
HELLS	AC138956.1	0.698578	1.78226e-70	postive		BAD	AC020978.3	-0.377876	1.6769e-17	negative		SCAF11	AL031432.3	0.437025	1.75343e-23	postive
LOX	MIR223HG	0.698544	1.82177e-70	postive		BCL2L11	AC020978.3	0.49183	3.52067e-30	postive		SCAF11	AC069234.4	0.454649	1.66289e-25	postive
ZEB1	AC018926.1	0.698388	2.01304e-70	postive		BCL2L12	AC020978.3	-0.352229	2.91225e-15	negative		SCAF11	AC012615.4	0.378737	1.39879e-17	postive
HELLS	AP4B1-AS1	0.698273	2.16834e-70	postive		BAD	AC008608.2	0.366112	1.89144e-16	postive		SCAF11	LINC02576	0.513407	3.62529e-33	postive
HELLS	AC026470.2	0.698244	2.20938e-70	postive		BID	AC008608.2	0.336828	5.18403e-14	postive		SCAF11	GARS1-DT	0.593874	2.0298e-46	postive
HELLS	AC012085.2	0.69797	2.63538e-70	postive		CSE1L	AC022509.3	-0.334184	8.36415e-14	negative		SCAF11	LINC01091	0.539457	4.53201e-37	postive
HELLS	AC068620.2	0.697918	2.72395e-70	postive		BAD	CHKB-DT	0.306491	9.57491e-12	postive		NLRP6	AC104248.1	0.322433	6.63678e-13	postive
HELLS	AC018926.1	0.697749	3.03655e-70	postive		BCL2L12	CHKB-DT	0.375843	2.56711e-17	postive		IL1B	AC091180.3	0.307958	7.54069e-12	postive
ZEB1	AF230666.1	0.697491	3.58285e-70	postive		BID	CHKB-DT	0.448939	7.74891e-25	postive		SCAF11	AC091180.3	0.426452	2.52364e-22	postive
ZEB1	MIR133A1HG	0.697486	3.59498e-70	postive		BAD	CARMN	-0.348747	5.66218e-15	negative		IL1B	ATP11A-AS1	0.417639	2.17101e-21	postive
LOX	AC016747.1	0.697354	3.91127e-70	postive		BCL2L11	CARMN	0.468806	3.2226e-27	postive		SCAF11	ATP11A-AS1	0.670999	3.53312e-63	postive
HELLS	ITGA6-AS1	0.697347	3.92878e-70	postive		BCL2L12	CARMN	-0.335587	6.49292e-14	negative		SCAF11	NXT1-AS1	0.340997	2.41535e-14	postive
HELLS	LINC00641	0.69703	4.8127e-70	postive		BCL2	STXBP5-AS1	0.330244	1.69176e-13	postive		IL1B	AL033397.2	0.402027	8.43312e-20	postive
HELLS	AC008906.1	0.696922	5.15729e-70	postive		BCL2L1	STXBP5-AS1	-0.30119	2.24602e-11	negative		SCAF11	AL033397.2	0.71866	2.45007e-76	postive
HELLS	AC005072.1	0.696897	5.24188e-70	postive		BCL2L11	STXBP5-AS1	0.338637	3.72655e-14	postive		SCAF11	AC068790.4	0.533404	3.92299e-36	postive
HELLS	AC131159.1	0.696274	7.80447e-70	postive		BCL2L12	STXBP5-AS1	-0.37171	6.04496e-17	negative		TNF	AC004865.2	0.399322	1.55933e-19	postive
ZEB1	Z82217.1	0.696073	8.87265e-70	postive		BAK1	AC125257.1	-0.322337	6.74735e-13	negative		SCAF11	AC005046.2	0.576328	3.26561e-43	postive
ZEB1	AC095055.1	0.695891	9.96344e-70	postive		BCL2L11	AC125257.1	0.385959	2.99386e-18	postive		SCAF11	AC004803.1	0.50062	2.26631e-31	postive
ZEB1	AL133243.2	0.695836	1.03173e-69	postive		CSE1L	AC125257.1	0.311523	4.19517e-12	postive		IL1B	AC007314.1	0.428508	1.51342e-22	postive
HELLS	AL596202.1	0.695398	1.36341e-69	postive		TNFRSF1A	AC125257.1	-0.359959	6.45966e-16	negative		SCAF11	AC007314.1	0.651233	2.04716e-58	postive
HELLS	AL031670.1	0.695292	1.45816e-69	postive		BAD	AC012464.2	-0.34976	4.67065e-15	negative		IL1B	AC008957.1	0.418872	1.6127e-21	postive
HELLS	AL109614.1	0.695228	1.51883e-69	postive		BCL2L11	AC012464.2	0.482463	6.00731e-29	postive		SCAF11	AC008957.1	0.581528	3.8354e-44	postive
ZEB1	AL133243.3	0.695033	1.71854e-69	postive		BCL2L12	AC012464.2	-0.323206	5.80646e-13	negative		PLCG1	AC115618.1	0.322659	6.38255e-13	postive
HELLS	AP005131.1	0.694735	2.07666e-69	postive		TNFRSF10A	PRKAR2A-AS1	-0.311491	4.21699e-12	negative		IL1B	AC027288.3	0.462422	1.95162e-26	postive
HELLS	AC093788.1	0.694729	2.08385e-69	postive		BCL2L12	AC006960.4	-0.305059	1.20758e-11	negative		SCAF11	AC027288.3	0.512572	4.77428e-33	postive
ZEB1	AC068234.2	0.694579	2.29212e-69	postive		CRADD	AL513320.1	-0.30863	6.75568e-12	negative		NOD2	LINC02487	0.354574	1.85245e-15	postive
HELLS	AC004223.2	0.694535	2.35717e-69	postive		BAD	AC005757.1	-0.347641	6.98143e-15	negative		PLCG1	LINC02487	0.422878	6.08734e-22	postive
HELLS	AL020997.2	0.694498	2.41277e-69	postive		BCL2L11	AC005757.1	0.498841	3.97376e-31	postive		IL1B	AC093484.4	0.323404	5.61165e-13	postive
HELLS	MESTIT1	0.694373	2.61138e-69	postive		BCL2L12	AC005757.1	-0.311021	4.55851e-12	negative		SCAF11	AC093484.4	0.637412	2.72601e-55	postive
ZEB1	AC112503.2	0.694269	2.78916e-69	postive		BCL2L11	AC083900.1	0.337231	4.81719e-14	postive		SCAF11	INE1	0.47654	3.45396e-28	postive
HELLS	AC073487.1	0.694249	2.82506e-69	postive		BAD	AC139887.2	-0.332553	1.12088e-13	negative		SCAF11	AL391421.1	0.52194	2.07883e-34	postive
ZEB1	ZNF451-AS1	0.694055	3.19418e-69	postive		BCL2L11	AC139887.2	0.491159	4.32646e-30	postive		SCAF11	AC060780.1	0.470219	2.15201e-27	postive
ZEB1	AC026356.2	0.694045	3.21294e-69	postive		BCL2L12	AC139887.2	-0.376278	2.34423e-17	negative		SCAF11	AC078846.1	0.591128	6.64025e-46	postive
HELLS	AC108449.1	0.693846	3.64509e-69	postive		BCL2L2	AC139887.2	0.399	1.67705e-19	postive		IL1B	AC133644.1	0.631141	6.3248e-54	postive
HELLS	AC092338.1	0.693756	3.85699e-69	postive		BAD	AC011676.2	-0.353052	2.48557e-15	negative		SCAF11	AC133644.1	0.594196	1.76491e-46	postive
HELLS	AC090519.2	0.693482	4.5866e-69	postive		BCL2A1	AC011676.2	0.341409	2.23842e-14	postive		IL18	LINC02418	-0.308021	7.46268e-12	negative
ZEB1	MRPS30-DT	0.693358	4.95727e-69	postive		BCL2L11	AC011676.2	0.551815	4.81163e-39	postive		PLCG1	LINC02418	0.411148	1.01758e-20	postive
ZEB1	AL360219.2	0.6933	5.14466e-69	postive		BCL2L12	AC011676.2	-0.326713	3.15377e-13	negative		SCAF11	AC092902.2	0.453817	2.08448e-25	postive
ZEB1	AC005070.3	0.693227	5.38394e-69	postive		BAD	NARF-IT1	-0.346338	8.92587e-15	negative		IL1B	AC004594.1	0.356141	1.36615e-15	postive
HELLS	DIAPH2-AS1	0.693096	5.84897e-69	postive		BCL2A1	NARF-IT1	0.324533	4.61335e-13	postive		SCAF11	AC004594.1	0.709491	1.34148e-73	postive
HELLS	AC005757.1	0.693084	5.89239e-69	postive		BCL2L11	NARF-IT1	0.585255	8.06924e-45	postive		SCAF11	SNHG16	0.53105	8.97578e-36	postive
HELLS	AC022001.2	0.693077	5.91725e-69	postive		BCL2L12	NARF-IT1	-0.335383	6.7366e-14	negative		PLCG1	AC092119.2	0.329607	1.89421e-13	postive
HELLS	AL133230.2	0.692963	6.35809e-69	postive		BCL2L2	NARF-IT1	0.348818	5.58618e-15	postive		IL1B	ZFPM2-AS1	0.332567	1.11824e-13	postive
ZEB1	AC053513.2	0.692919	6.53608e-69	postive		BCL2L1	AC090152.1	-0.309365	5.9886e-12	negative		SCAF11	ZFPM2-AS1	0.388678	1.65905e-18	postive
HELLS	AC018690.1	0.692694	7.53299e-69	postive		CSE1L	AC090152.1	-0.333315	9.77861e-14	negative		IL1B	AC012181.1	0.48449	3.27524e-29	postive
LOX	AC112721.2	0.692691	7.54623e-69	postive		BAD	SEMA6A-AS1	-0.340608	2.59486e-14	negative		SCAF11	AC012181.1	0.695302	1.4492e-69	postive
HELLS	AP001793.1	0.69269	7.55103e-69	postive		BCL2L11	SEMA6A-AS1	0.466139	6.8703e-27	postive		IL1B	AC020612.3	0.487001	1.53663e-29	postive
HELLS	AC004943.1	0.6926	7.99072e-69	postive		BCL2L12	SEMA6A-AS1	-0.334179	8.37219e-14	negative		SCAF11	AC020612.3	0.626499	6.19369e-53	postive
ZEB1	AL606834.2	0.692523	8.38459e-69	postive		BAD	AC104109.4	-0.385983	2.97853e-18	negative		PLCG1	AC010973.2	0.357616	1.02419e-15	postive
HELLS	TTC3-AS1	0.692497	8.52133e-69	postive		BCL2A1	AC104109.4	0.33993	2.94007e-14	postive		PLCG1	LINC01176	0.405639	3.67826e-20	postive
HELLS	GAS5-AS1	0.692229	1.00861e-68	postive		BCL2L11	AC104109.4	0.498504	4.41772e-31	postive		IL1B	AC002558.2	0.445801	1.78354e-24	postive
ZEB1	AC008537.2	0.692146	1.06243e-68	postive		BCL2L12	AC104109.4	-0.347159	7.64774e-15	negative		SCAF11	AC002558.2	0.696533	6.61202e-70	postive
HELLS	AC015911.3	0.69194	1.20876e-68	postive		BAD	TNFRSF10A-AS1	-0.326713	3.15331e-13	negative		PLCG1	AC073111.1	0.343753	1.44862e-14	postive
HELLS	PTPRG-AS1	0.691771	1.34387e-68	postive		BCL2L12	TNFRSF10A-AS1	-0.354702	1.80682e-15	negative		SCAF11	AC073111.1	0.336452	5.55012e-14	postive
HELLS	AC009996.1	0.691585	1.51027e-68	postive		FAS	TNFRSF10A-AS1	0.3803	1.00524e-17	postive		IL1B	NHS-AS1	0.352057	3.00982e-15	postive
ZEB1	AC004466.2	0.691568	1.52565e-68	postive		TNFRSF10A	TNFRSF10A-AS1	0.611052	9.36327e-50	postive		SCAF11	NHS-AS1	0.384184	4.38914e-18	postive
ZEB1	ACAP2-IT1	0.69149	1.60239e-68	postive		TNFRSF10B	TNFRSF10A-AS1	0.520762	3.09999e-34	postive		SCAF11	RNASEH2B-AS1	0.54578	4.53464e-38	postive
HELLS	ALKBH3-AS1	0.690674	2.66661e-68	postive		BAD	AC018695.3	-0.311806	4.00323e-12	negative		SCAF11	MIRLET7A1HG	0.702346	1.54328e-71	postive
ZEB1	AC100774.1	0.69066	2.69049e-68	postive		BCL2L11	AC018695.3	0.440943	6.37228e-24	postive		SCAF11	LINC00539	0.443005	3.72118e-24	postive
HELLS	CEP250-AS1	0.690447	3.0728e-68	postive		BAD	AL022311.1	-0.349087	5.30787e-15	negative		CASP6	MMP25-AS1	-0.320067	9.96206e-13	negative
HELLS	AC005104.1	0.690412	3.14093e-68	postive		BCL2L11	AL022311.1	0.495245	1.2243e-30	postive		GSDMD	LINC02878	0.38194	7.09426e-18	postive
ZEB1	AC110813.1	0.690378	3.20811e-68	postive		BCL2L12	AL022311.1	-0.320798	8.79127e-13	negative		SCAF11	XXYLT1-AS2	0.327083	2.95537e-13	postive
ZEB1	AC007684.2	0.689753	4.73109e-68	postive		BCL2L11	AC009065.3	-0.358318	8.92386e-16	negative		SCAF11	AC024361.3	0.313046	3.25783e-12	postive
ZEB1	AC090519.2	0.689352	6.06916e-68	postive		FAS	AC009065.3	-0.319978	1.01158e-12	negative		IL1B	AC005332.7	0.374683	3.26884e-17	postive
PTGS2	AC079793.1	0.689339	6.11837e-68	postive		BCL2A1	LRP1-AS	0.300787	2.39464e-11	postive		SCAF11	AC005332.7	0.555255	1.31258e-39	postive
HELLS	AC114760.2	0.689096	7.11369e-68	postive		BCL2L11	LRP1-AS	0.36069	5.59107e-16	postive		SCAF11	AC125494.2	0.315777	2.06229e-12	postive
HELLS	AC015987.1	0.689039	7.36782e-68	postive		BAD	AC025917.1	-0.379103	1.2949e-17	negative		GSDMD	AC011498.3	0.302135	1.9318e-11	postive
HELLS	AL360093.1	0.688439	1.06811e-67	postive		BCL2A1	AC025917.1	0.354296	1.95478e-15	postive		SCAF11	MCPH1-AS1	0.521431	2.47113e-34	postive
HELLS	AC104984.3	0.688277	1.18048e-67	postive		BCL2L11	AC025917.1	0.513841	3.14134e-33	postive		SCAF11	AP001893.1	0.692568	8.15303e-69	postive
ZEB1	AC243773.2	0.68814	1.28426e-67	postive		BCL2L12	AC025917.1	-0.366091	1.89976e-16	negative		IL1B	AP001434.1	0.848916	1.58881e-132	postive
HELLS	AC244093.3	0.688096	1.31999e-67	postive		BAK1	AC008124.1	-0.322451	6.6154e-13	negative		SCAF11	AP001434.1	0.421019	9.58281e-22	postive
HELLS	AC096564.1	0.687513	1.89055e-67	postive		BCL2L11	AC008124.1	0.394335	4.77141e-19	postive		IL1B	POLH-AS1	0.361614	4.65502e-16	postive
HELLS	AL031666.2	0.687487	1.92043e-67	postive		BCL2L12	AC008124.1	-0.36427	2.74003e-16	negative		SCAF11	POLH-AS1	0.518802	6.00543e-34	postive
HELLS	EP300-AS1	0.687391	2.03768e-67	postive		CSE1L	AL391121.1	-0.367512	1.42519e-16	negative		IL1B	AC022784.6	0.340059	2.871e-14	postive
HELLS	AC068790.3	0.687262	2.20657e-67	postive		TNFRSF1A	AL391121.1	0.343635	1.48069e-14	postive		SCAF11	AC022784.6	0.423999	4.62302e-22	postive
ZEB1	AL109923.1	0.687109	2.42359e-67	postive		BAD	VAC14-AS1	-0.360935	5.32598e-16	negative		SCAF11	AC006333.1	0.338103	4.10907e-14	postive
ZEB1	MAGI1-IT1	0.686875	2.79817e-67	postive		BCL2L11	VAC14-AS1	0.483966	3.83262e-29	postive		PLCG1	AP001160.1	0.310376	5.07064e-12	postive
HELLS	AC108727.1	0.686682	3.14932e-67	postive		BCL2L12	VAC14-AS1	-0.300309	2.58335e-11	negative		SCAF11	ZFHX2-AS1	0.530269	1.17943e-35	postive
ZEB1	AL513534.3	0.686661	3.19021e-67	postive		BAD	AC016831.4	-0.367606	1.39822e-16	negative		SCAF11	AC087588.2	0.658932	3.15424e-60	postive
ZEB1	AL035530.2	0.686659	3.19404e-67	postive		BCL2L11	AC016831.4	0.483804	4.02311e-29	postive		SCAF11	AL683813.2	0.587245	3.4822e-45	postive
ZEB1	ALG13-AS1	0.68641	3.72058e-67	postive		BCL2L12	AC016831.4	-0.342719	1.75573e-14	negative		SCAF11	AC119403.1	0.351795	3.1655e-15	postive
HELLS	AC007216.4	0.686407	3.72803e-67	postive		BAD	AC100774.1	-0.382424	6.39805e-18	negative		IL1B	AC103923.1	0.340578	2.60914e-14	postive
ZEB1	AC021078.1	0.686368	3.81915e-67	postive		BCL2A1	AC100774.1	0.330787	1.5362e-13	postive		SCAF11	AC103923.1	0.684606	1.11993e-66	postive
HELLS	AC007684.2	0.68627	4.05432e-67	postive		BCL2L11	AC100774.1	0.483631	4.23682e-29	postive		IL1B	AC108472.1	0.374084	3.70176e-17	postive
HELLS	AC018926.3	0.686256	4.08964e-67	postive		BCL2L12	AC100774.1	-0.343912	1.40632e-14	negative		SCAF11	AC108472.1	0.515643	1.72737e-33	postive
HELLS	TBL1XR1-AS1	0.685695	5.76432e-67	postive		BCL2	AC009159.3	0.370121	8.37634e-17	postive		SCAF11	AC095057.3	0.467052	5.30636e-27	postive
ZEB1	PLCG1-AS1	0.685501	6.48776e-67	postive		BCL2A1	AC009159.3	0.42464	3.94869e-22	postive		SCAF11	PVT1	0.336034	5.987e-14	postive
HELLS	AL031666.1	0.685166	7.96103e-67	postive		BCL2L11	AC009159.3	0.481362	8.33631e-29	postive		IL1B	AL139807.1	0.59509	1.19598e-46	postive
HELLS	AL020997.3	0.685148	8.04969e-67	postive		BAD	GABPB1-AS1	-0.361882	4.41331e-16	negative		SCAF11	AL139807.1	0.592252	4.09315e-46	postive
HELLS	AC019080.5	0.68509	8.33988e-67	postive		BCL2L11	GABPB1-AS1	0.429338	1.23011e-22	postive		SCAF11	AC123023.1	0.366989	1.58448e-16	postive
HELLS	CD44-AS1	0.68495	9.08151e-67	postive		BCL2L11	AC012173.1	0.356593	1.25084e-15	postive		SCAF11	AC007991.4	0.441392	5.67042e-24	postive
HELLS	AC000123.1	0.684692	1.06269e-66	postive		BCL2L11	PHC2-AS1	0.40811	2.07318e-20	postive		IL1B	AC091185.1	0.398566	1.84948e-19	postive
HELLS	AC012676.3	0.684467	1.21833e-66	postive		BCL2L11	SNHG28	0.379704	1.14044e-17	postive		SCAF11	AC091185.1	0.623304	2.91173e-52	postive
PTGS2	AC107021.1	0.68439	1.27686e-66	postive		BCL2L11	AC138028.2	0.402975	6.78941e-20	postive		SCAF11	AC087277.2	0.540494	3.11735e-37	postive
HELLS	AL353804.2	0.684379	1.28536e-66	postive		BCL2L11	NARF-AS1	0.414734	4.35285e-21	postive		IL1B	AL021328.1	0.384769	3.87023e-18	postive
HELLS	AC104109.4	0.684342	1.31487e-66	postive		BCL2L2	NARF-AS1	0.304452	1.33192e-11	postive		SCAF11	AL021328.1	0.661556	7.3943e-61	postive
ZEB1	KANSL1L-AS1	0.684302	1.34724e-66	postive		BAD	GRPEL2-AS1	-0.333997	8.65102e-14	negative		SCAF11	AC093382.1	0.598105	3.19441e-47	postive
PTGS2	AC018682.1	0.684174	1.45571e-66	postive		BCL2L11	GRPEL2-AS1	0.343989	1.38618e-14	postive		SCAF11	CHN2-AS1	0.506656	3.28856e-32	postive
ZEB1	AL590723.1	0.684149	1.47762e-66	postive		BCL2L11	AC010655.2	0.319274	1.14068e-12	postive		IL1B	AC015914.1	0.40001	1.33409e-19	postive
HELLS	LNCSRLR	0.684145	1.48141e-66	postive		BCL2L11	AC092757.3	0.358267	9.01361e-16	postive		SCAF11	AC015914.1	0.643779	1.03788e-56	postive
PTGS2	AL136115.2	0.683906	1.7129e-66	postive		BCL2L12	AC092757.3	-0.316097	1.95428e-12	negative		SCAF11	AC007128.2	0.471537	1.47435e-27	postive
ZEB1	AL020997.3	0.683394	2.33674e-66	postive		BCL2L2	AC092757.3	0.301834	2.02691e-11	postive		CASP6	SATB2-AS1	0.352728	2.64584e-15	postive
HELLS	AC020915.1	0.68324	2.56455e-66	postive		BAD	AC007128.1	-0.304294	1.36624e-11	negative		IL1B	INO80-AS1	0.326472	3.28944e-13	postive
HELLS	AC026356.1	0.683239	2.56546e-66	postive		BAK1	AC007128.1	-0.32642	3.31942e-13	negative		SCAF11	INO80-AS1	0.701272	3.11206e-71	postive
ZEB1	CERNA1	0.683066	2.84954e-66	postive		BCL2L11	AC007128.1	0.310232	5.1921e-12	postive		IL1B	AL049840.6	0.372037	5.65172e-17	postive
ZEB1	HECW2-AS1	0.682625	3.71824e-66	postive		TNFRSF1A	AC007128.1	-0.342246	1.91709e-14	negative		SCAF11	AL049840.6	0.371694	6.06543e-17	postive
HELLS	AC093157.2	0.682515	3.97464e-66	postive		BAD	AC092681.2	-0.354074	2.04054e-15	negative		IL1B	AC092944.1	0.319472	1.10273e-12	postive
PTGS2	AC018755.4	0.682363	4.35574e-66	postive		BCL2L11	AC092681.2	0.476234	3.77761e-28	postive		SCAF11	AC092944.1	0.503641	8.66601e-32	postive
HELLS	LURAP1L-AS1	0.682322	4.46413e-66	postive		BCL2L12	AC092681.2	-0.334788	7.50168e-14	negative		IL1B	LPP-AS1	0.492261	3.0827e-30	postive
PTGS2	HIF1A-AS3	0.682011	5.38295e-66	postive		BAD	AC108727.1	-0.3644	2.66947e-16	negative		SCAF11	LPP-AS1	0.669611	7.84649e-63	postive
HELLS	AC009090.3	0.681939	5.62282e-66	postive		BCL2A1	AC108727.1	0.331966	1.2451e-13	postive		IL1B	AC073957.1	0.304739	1.2717e-11	postive
ZEB1	LINC01578	0.681883	5.81614e-66	postive		BCL2L11	AC108727.1	0.462071	2.15257e-26	postive		SCAF11	AC073957.1	0.616582	7.13573e-51	postive
ZEB1	SCARNA9	0.681861	5.89261e-66	postive		BCL2L12	AC108727.1	-0.316507	1.82387e-12	negative		SCAF11	AC144548.1	0.447008	1.29552e-24	postive
PTGS2	MEIS1-AS2	0.681745	6.31978e-66	postive		BAK1	AC120053.1	-0.353797	2.15279e-15	negative		IL1B	AC011676.1	0.473063	9.49377e-28	postive
PTGS2	AC025280.1	0.681586	6.95024e-66	postive		BCL2L11	AC120053.1	0.319741	1.05342e-12	postive		SCAF11	AC011676.1	0.494661	1.46798e-30	postive
ZEB1	AC006064.2	0.681572	7.0093e-66	postive		BCL2L12	AC120053.1	-0.300851	2.37036e-11	negative		SCAF11	AP003086.1	0.567291	1.2343e-41	postive
ZEB1	AC004466.3	0.681548	7.11388e-66	postive		TNFRSF1A	AC120053.1	-0.323164	5.84946e-13	negative		GSDMD	AL122035.1	-0.337409	4.66399e-14	negative
HELLS	AC068790.5	0.681417	7.69373e-66	postive		BCL2L1	SNHG3	-0.336969	5.05288e-14	negative		IL1B	AL122035.1	0.436303	2.1101e-23	postive
ZEB1	AC068790.6	0.681275	8.37798e-66	postive		BAK1	RAMP2-AS1	-0.303889	1.45816e-11	negative		PYCARD	AL122035.1	-0.305436	1.13622e-11	negative
HELLS	AC079793.1	0.681267	8.42055e-66	postive		BAD	CEP250-AS1	-0.358248	9.04772e-16	negative		SCAF11	AL122035.1	0.665284	9.18251e-62	postive
ZEB1	AL122035.1	0.68123	8.6114e-66	postive		BCL2A1	CEP250-AS1	0.320395	9.41901e-13	postive		TNF	LINC00996	0.320152	9.8186e-13	postive
ZEB1	LINC00987	0.681228	8.61971e-66	postive		BCL2L11	CEP250-AS1	0.532086	6.23962e-36	postive		SCAF11	AC083843.3	0.581363	4.10813e-44	postive
HELLS	AC011978.2	0.680926	1.03307e-65	postive		BCL2L12	CEP250-AS1	-0.359263	7.41013e-16	negative		SCAF11	HEXA-AS1	0.374192	3.61994e-17	postive
HELLS	AL008718.3	0.680711	1.17488e-65	postive		BCL2L11	AC012186.2	0.372851	4.77874e-17	postive		SCAF11	AL021707.4	0.33243	1.14595e-13	postive
HELLS	AL031770.1	0.680662	1.21e-65	postive		BAD	LINC01023	0.31848	1.30571e-12	postive		IL1B	ALOX12-AS1	0.352878	2.57053e-15	postive
ZEB1	AL513327.1	0.68022	1.57652e-65	postive		FAS	AC008443.1	-0.312206	3.74589e-12	negative		SCAF11	ALOX12-AS1	0.529181	1.72352e-35	postive
HELLS	AC095055.1	0.680009	1.78808e-65	postive		BCL2	HECW2-AS1	0.343366	1.55697e-14	postive		IL1B	AC131953.2	0.372087	5.59433e-17	postive
ZEB1	AC048344.4	0.679753	2.08311e-65	postive		BCL2A1	HECW2-AS1	0.449371	6.90485e-25	postive		SCAF11	AC131953.2	0.625392	1.06072e-52	postive
HELLS	ALG13-AS1	0.679547	2.35561e-65	postive		BCL2L11	HECW2-AS1	0.537586	8.87132e-37	postive		PLCG1	AC132872.1	0.374059	3.72141e-17	postive
ZEB1	AC069549.1	0.679522	2.39152e-65	postive		BCL2L12	HECW2-AS1	-0.364648	2.53982e-16	negative		SCAF11	MRPL20-AS1	-0.327624	2.68766e-13	negative
ZEB1	L3MBTL4-AS1	0.679305	2.72191e-65	postive		FAS	HECW2-AS1	0.347363	7.35858e-15	postive		IL1B	ST7-OT4	0.335565	6.5189e-14	postive
HELLS	MRTFA-AS1	0.679209	2.88075e-65	postive		BCL2A1	BX322234.1	0.53004	1.27749e-35	postive		SCAF11	ST7-OT4	0.727214	5.41968e-79	postive
HELLS	AL136115.2	0.678907	3.44773e-65	postive		BCL2L11	BX322234.1	0.459164	4.82273e-26	postive		IL1B	AC244093.4	0.437141	1.70215e-23	postive
ZEB1	AP002907.1	0.678562	4.2345e-65	postive		BCL2	AC007728.2	0.325517	3.88707e-13	postive		SCAF11	AC244093.4	0.698744	1.60111e-70	postive
ZEB1	AC012213.3	0.678448	4.53075e-65	postive		BCL2L11	AC007728.2	0.353804	2.14984e-15	postive		IL1B	AC079684.2	0.327017	2.98996e-13	postive
ZEB1	AL020995.1	0.678272	5.02853e-65	postive		CASP10	AC007728.2	0.328914	2.1411e-13	postive		SCAF11	AC079684.2	0.715414	2.34926e-75	postive
ZEB1	AL807757.2	0.678109	5.53933e-65	postive		FAS	AC007728.2	0.305514	1.12197e-11	postive		IL1B	PLCG1-AS1	0.507511	2.49372e-32	postive
ZEB1	THOC7-AS1	0.677939	6.12461e-65	postive		BAD	AC024451.4	-0.333025	1.0301e-13	negative		SCAF11	PLCG1-AS1	0.71933	1.53017e-76	postive
HELLS	AC010834.3	0.677923	6.18323e-65	postive		BCL2L11	AC024451.4	0.381554	7.70238e-18	postive		PLCG1	AC233728.1	0.40262	7.36442e-20	postive
ZEB1	AC211433.1	0.677911	6.22913e-65	postive		BCL2L12	AC024451.4	-0.308901	6.46225e-12	negative		IL1B	AL355312.2	0.397302	2.45821e-19	postive
ZEB1	AC019186.1	0.677781	6.72473e-65	postive		BCL2L11	AC011899.2	0.385533	3.2824e-18	postive		SCAF11	AL355312.2	0.626067	7.64107e-53	postive
HELLS	APOA1-AS	0.677742	6.88371e-65	postive		BCL2L2	AC011899.2	0.302297	1.88236e-11	postive		SCAF11	LINC00997	0.546308	8.97637e-15	postive
ZEB1	AC079793.1	0.677739	6.8938e-65	postive		BCL2L11	AC100791.3	0.360437	5.87829e-16	postive		SCAF11	AC073575.4	0.45833	6.07118e-26	postive
HELLS	AC073333.1	0.677569	7.62565e-65	postive		BAD	AC107021.1	-0.350689	3.91209e-15	negative		IL1B	ALMS1-IT1	0.385268	3.4757e-18	postive
ZEB1	CEP250-AS1	0.677518	7.85981e-65	postive		BCL2A1	AC107021.1	0.455744	1.23376e-25	postive		SCAF11	ALMS1-IT1	0.682709	3.53364e-66	postive
LOX	LINC01561	0.677428	8.28606e-65	postive		BCL2L11	AC107021.1	0.497468	6.11609e-31	postive		SCAF11	UBR5-AS1	0.447049	1.28166e-24	postive
ZEB1	AL158207.2	0.677393	8.46179e-65	postive		BCL2L12	AC107021.1	-0.326113	3.50284e-13	negative		IL1B	MAL2-AS1	0.485246	2.60964e-29	postive
HELLS	LINC01578	0.677248	9.21726e-65	postive		BCL2L11	AL031432.3	0.354271	1.96415e-15	postive		SCAF11	MAL2-AS1	0.637901	2.12624e-55	postive
HELLS	CRTC3-AS1	0.677235	9.29003e-65	postive		BAD	AC012615.4	-0.337972	4.20829e-14	negative		CASP6	ZBED5-AS1	0.323453	5.56414e-13	postive
HELLS	AC107081.2	0.677167	9.66976e-65	postive		BCL2L11	AC012615.4	0.347409	7.2942e-15	postive		SCAF11	ZDHHC20-IT1	0.308206	7.24094e-12	postive
PTGS2	AC004988.1	0.676978	1.08121e-64	postive		BCL2L2	AC012615.4	0.327684	2.65929e-13	postive		PLCG1	CACTIN-AS1	0.358091	9.3302e-16	postive
HELLS	AC018752.1	0.676898	1.13322e-64	postive		BCL2	LINC02576	0.312073	3.82939e-12	postive		IL1B	LINC01914	0.561901	1.02151e-40	postive
ZEB1	AF230666.2	0.676846	1.16878e-64	postive		BCL2L11	LINC02576	0.367967	1.29944e-16	postive		SCAF11	LINC01914	0.340903	2.45751e-14	postive
HELLS	AC107027.3	0.676797	1.2028e-64	postive		BCL2L12	LINC02576	-0.360836	5.43129e-16	negative		SCAF11	AC127537.1	0.329293	2.0024e-13	postive
HELLS	SND1-IT1	0.67666	1.30431e-64	postive		BAD	GARS1-DT	-0.366427	1.77484e-16	negative		SCAF11	AC073333.1	0.652744	9.11445e-59	postive
HELLS	AL109923.1	0.676516	1.42008e-64	postive		BCL2L11	GARS1-DT	0.424008	4.61329e-22	postive		CASP6	AC124248.1	0.390435	1.12956e-18	postive
ZEB1	AC007336.1	0.676437	1.48745e-64	postive		BCL2L12	GARS1-DT	-0.362911	3.59535e-16	negative		SCAF11	FAM160A1-DT	0.383541	5.03813e-18	postive
HELLS	AC005096.1	0.676229	1.68145e-64	postive		BCL2L11	LINC01091	0.330198	1.70577e-13	postive		CASP5	LINC01133	0.350696	3.90641e-15	postive
ZEB1	ST7-OT4	0.676104	1.80888e-64	postive		BCL2L11	AC091180.3	0.418199	1.89693e-21	postive		IL18	LINC01133	0.302956	1.6938e-11	postive
ZEB1	ALKBH3-AS1	0.676082	1.83321e-64	postive		BAD	ATP11A-AS1	-0.350663	3.93161e-15	negative		CASP1	LINC00114	0.42026	1.15233e-21	postive
HELLS	AL390195.3	0.676038	1.88076e-64	postive		BCL2L11	ATP11A-AS1	0.488752	9.0287e-30	postive		CASP6	CIRBP-AS1	-0.308203	7.24373e-12	negative
HELLS	MIR155HG	0.676011	1.91136e-64	postive		BCL2L12	ATP11A-AS1	-0.331201	1.42714e-13	negative		PLCG1	AL009178.2	0.374593	3.33083e-17	postive
LOX	MAGI2-AS3	0.675949	1.98235e-64	postive		BAD	AL033397.2	-0.395846	3.40712e-19	negative		GSDMD	AC005261.1	-0.389951	1.256e-18	negative
ZEB1	AL031651.2	0.675929	2.00473e-64	postive		BCL2L11	AL033397.2	0.467409	4.79568e-27	postive		IL1B	AC005261.1	0.370752	7.35957e-17	postive
HELLS	AC244093.5	0.675857	2.09217e-64	postive		BCL2L12	AL033397.2	-0.345069	1.13287e-14	negative		SCAF11	AC005261.1	0.744244	1.36178e-84	postive
ZEB1	AL683813.2	0.675688	2.31076e-64	postive		BAD	AC068790.4	-0.343248	1.59132e-14	negative		SCAF11	Z82243.1	0.589278	1.46643e-45	postive
ZEB1	MRTFA-AS1	0.675404	2.72984e-64	postive		BCL2L11	AC068790.4	0.449827	6.11218e-25	postive		IL1B	AC087392.2	0.577992	1.65235e-43	postive
HELLS	GLYCTK-AS1	0.674826	3.82918e-64	postive		BCL2L12	AC068790.4	-0.320259	9.64124e-13	negative		SCAF11	AC087392.2	0.471322	1.56819e-27	postive
ZEB1	AC007620.3	0.674769	3.9584e-64	postive		BCL2	AC004865.2	0.359573	6.97142e-16	postive		IL1B	ITGA6-AS1	0.312364	3.64867e-12	postive
HELLS	AC084876.1	0.674726	4.06002e-64	postive		BCL2A1	AC004865.2	0.30021	2.62436e-11	postive		SCAF11	ITGA6-AS1	0.674809	3.86682e-64	postive
HELLS	AL596325.2	0.67464	4.26879e-64	postive		BCL2L11	AC004865.2	0.318677	1.26272e-12	postive		SCAF11	MNX1-AS1	-0.317771	1.47263e-12	negative
HELLS	ARNTL2-AS1	0.674293	5.22855e-64	postive		BAD	AC005046.2	-0.34163	2.14865e-14	negative		SCAF11	SLC5A4-AS1	0.375426	2.80038e-17	postive
HELLS	AC009299.2	0.674264	5.31775e-64	postive		BCL2L11	AC005046.2	0.331109	1.45074e-13	postive		IL1B	UBE2R2-AS1	0.33356	9.35755e-14	postive
ZEB1	AC007390.1	0.674161	5.64743e-64	postive		BCL2	AC004803.1	0.326732	3.14311e-13	postive		SCAF11	UBE2R2-AS1	0.497937	5.27987e-31	postive
HELLS	FAM53B-AS1	0.674122	5.77788e-64	postive		BCL2L11	AC004803.1	0.368588	1.14521e-16	postive		SCAF11	AL121895.2	0.33849	3.82808e-14	postive
HELLS	AC007114.2	0.674038	6.06712e-64	postive		BCL2L12	AC004803.1	-0.3303	1.67515e-13	negative		IL1B	AL133230.2	0.48123	8.66974e-29	postive
ZEB1	HMGA2-AS1	0.673922	6.49328e-64	postive		BCL2L2	AC004803.1	0.31205	3.84429e-12	postive		SCAF11	AL133230.2	0.691191	1.93211e-68	postive
ZEB1	AL139147.1	0.67354	8.11107e-64	postive		BAD	AC007314.1	-0.316805	1.73437e-12	negative		IL1B	AC244093.3	0.378819	1.37502e-17	postive
PRKAA2	AL353593.2	0.673499	8.30494e-64	postive		BCL2L11	AC007314.1	0.44009	7.95232e-24	postive		SCAF11	AC244093.3	0.661803	6.44524e-61	postive
HELLS	ASAP1-IT2	0.67331	9.27202e-64	postive		BCL2A1	AC008957.1	0.360893	5.37081e-16	postive		IL1B	LUCAT1	0.804057	2.00931e-108	postive
CRYAB	AP001107.5	0.672983	1.12141e-63	postive		BCL2L11	AC008957.1	0.484845	2.94366e-29	postive		SCAF11	LUCAT1	0.452158	3.26557e-25	postive
ZEB1	AL353804.2	0.672679	1.33777e-63	postive		BMF	AC008074.2	0.301362	2.18535e-11	postive		SCAF11	NFYC-AS1	0.521755	2.21365e-34	postive
ZEB1	AC016831.4	0.672638	1.36945e-63	postive		BCL2	AC027288.3	0.303972	1.43888e-11	postive		IL1B	EP300-AS1	0.41622	3.05161e-21	postive
HELLS	AC079907.1	0.672181	1.78517e-63	postive		BCL2A1	AC027288.3	0.377093	1.97661e-17	postive		SCAF11	EP300-AS1	0.610604	1.15091e-49	postive
ZEB1	AC093535.1	0.672131	1.83748e-63	postive		BCL2L11	AC027288.3	0.467498	4.67638e-27	postive		SCAF11	AL158212.2	0.45281	2.73877e-25	postive
HELLS	AC009269.5	0.672033	1.94454e-63	postive		BCL2L12	AC027288.3	-0.33957	3.14069e-14	negative		SCAF11	AC006111.2	0.538176	7.18196e-37	postive
HELLS	AC010542.6	0.671997	1.98536e-63	postive		BCL2L1	LINC02487	0.378679	1.41601e-17	postive		SCAF11	AC091729.2	0.363325	3.31056e-16	postive
ZEB1	AL592148.3	0.671987	1.99758e-63	postive		FAS	LINC02487	-0.372611	5.02076e-17	negative		SCAF11	AC090510.2	0.563722	5.02303e-41	postive
HELLS	AC004832.5	0.671904	2.09509e-63	postive		BCL2L1	AC093484.4	-0.326783	3.11514e-13	negative		SCAF11	AL162734.1	0.602076	5.49209e-48	postive
HELLS	AL354989.1	0.671878	2.12775e-63	postive		BCL2L11	AC093484.4	0.349978	4.48043e-15	postive		IL1B	AC087521.2	0.411867	8.589e-21	postive
ZEB1	CNOT10-AS1	0.671804	2.22046e-63	postive		FAS	AC093484.4	0.320749	8.86501e-13	postive		SCAF11	AC087521.2	0.715601	2.06474e-75	postive
ZEB1	AC010834.3	0.671718	2.33271e-63	postive		TNFRSF1A	AC093484.4	-0.302141	1.92983e-11	negative		IL1B	AL133243.3	0.416025	3.19773e-21	postive
ZEB1	AC112512.1	0.671481	2.67564e-63	postive		BAD	INE1	-0.334859	7.40585e-14	negative		SCAF11	AL133243.3	0.758426	1.31699e-89	postive
ZEB1	AC127164.1	0.671477	2.68139e-63	postive		BCL2L11	INE1	0.402541	7.49803e-20	postive		SCAF11	AC079907.1	0.603993	2.32714e-48	postive
ZEB1	AL138963.1	0.671417	2.77585e-63	postive		BCL2L12	INE1	-0.306643	9.34268e-12	negative		GSDMD	MINCR	0.34762	7.00964e-15	postive
HELLS	ZBTB20-AS5	0.671305	2.96102e-63	postive		BAD	AL391421.1	-0.312151	3.78011e-12	negative		IL1B	AF230666.2	0.545712	4.64859e-38	postive
HELLS	AC016644.1	0.671277	3.01041e-63	postive		BCL2L11	AL391421.1	0.468413	3.60521e-27	postive		SCAF11	AF230666.2	0.693974	3.36132e-69	postive
ZEB1	AC026470.2	0.671193	3.15997e-63	postive		BCL2L12	AL391421.1	-0.314373	2.6105e-12	negative		PLCG1	CAPN10-DT	0.431367	7.39222e-23	postive
HELLS	AC007336.1	0.671146	3.2468e-63	postive		BCL2L11	AC060780.1	0.452985	2.61191e-25	postive		SCAF11	AL109614.1	0.708169	3.26271e-73	postive
HELLS	ZNF433-AS1	0.671132	3.27178e-63	postive		BAD	AC078846.1	-0.366176	1.86747e-16	negative		IL1B	AL136115.1	0.54259	1.45703e-37	postive
ZEB1	TIMM23B-AGAP6	0.67082	3.91677e-63	postive		BCL2L11	AC078846.1	0.50537	4.9765e-32	postive		SCAF11	AL136115.1	0.676088	1.82615e-64	postive
HELLS	AL157392.4	0.670804	3.95324e-63	postive		BCL2L12	AC078846.1	-0.305811	1.06922e-11	negative		SCAF11	AC024560.3	0.425422	3.25566e-22	postive
HELLS	AC016727.1	0.670771	4.02854e-63	postive		BCL2A1	AC133644.1	0.44517	2.10685e-24	postive		SCAF11	AC010320.4	0.560964	1.46899e-40	postive
HELLS	AC009032.1	0.670714	4.16296e-63	postive		BCL2L11	AC133644.1	0.503844	8.11992e-32	postive		TNF	FAM30A	0.358534	8.55298e-16	postive
HELLS	NPTN-IT1	0.670556	4.5604e-63	postive		BCL2L12	AC133644.1	-0.316317	1.88319e-12	negative		IL1B	LINC00355	0.450023	5.79876e-25	postive
HELLS	AC068790.2	0.670325	5.2073e-63	postive		CSE1L	LINC02418	0.359672	6.83736e-16	postive		SCAF11	AC004584.1	0.553347	2.70303e-39	postive
HELLS	AC025917.1	0.670195	5.6107e-63	postive		BAD	AC004594.1	-0.390197	1.19006e-18	negative		SCAF11	AC242426.2	0.540431	3.18819e-37	postive
ZEB1	AC079313.2	0.670177	5.66888e-63	postive		BCL2L11	AC004594.1	0.518115	7.56327e-34	postive		SCAF11	LINC01806	0.45123	4.19367e-25	postive
ZEB1	AF117829.1	0.670119	5.86253e-63	postive		BCL2L12	AC004594.1	-0.368209	1.23711e-16	negative		SCAF11	AC084357.2	0.548268	1.80862e-38	postive
PTGS2	AC003991.1	0.6699	6.64923e-63	postive		BAD	SNHG16	-0.300535	2.49243e-11	negative		NOD2	FBXL19-AS1	0.335369	6.75332e-14	postive
HELLS	AL136115.1	0.669703	7.44175e-63	postive		TNFRSF1A	SNHG16	-0.33979	3.01675e-14	negative		PLCG1	FBXL19-AS1	0.333814	8.93914e-14	postive
HELLS	AL356124.1	0.669566	8.05311e-63	postive		BCL2L11	ZFPM2-AS1	0.306225	9.9988e-12	postive		IL1B	AC009269.5	0.529831	1.37435e-35	postive
HELLS	AC008456.1	0.669359	9.06544e-63	postive		BCL2A1	AC012181.1	0.380851	8.94304e-18	postive		SCAF11	AC009269.5	0.671568	2.54426e-63	postive
ZEB1	AC007285.2	0.669136	1.02991e-62	postive		BCL2L11	AC012181.1	0.537613	8.78619e-37	postive		SCAF11	LINC01545	0.502028	1.44963e-31	postive
ZEB1	AC011595.1	0.668979	1.12687e-62	postive		BCL2L12	AC012181.1	-0.338679	3.69842e-14	negative		IL1B	AC010168.1	0.300257	2.60502e-11	postive
ZEB1	GAS5-AS1	0.668869	1.19999e-62	postive		FAS	AC012181.1	0.333378	9.66923e-14	postive		SCAF11	AC010168.1	0.659764	1.99386e-60	postive
ZEB1	AC010226.1	0.66844	1.53278e-62	postive		BCL2L11	AC104794.3	0.374841	3.1634e-17	postive		SCAF11	LINC01748	0.330616	1.58372e-13	postive
ZEB1	AC012447.1	0.668187	1.77044e-62	postive		BAD	AC020612.3	-0.397019	2.61951e-19	negative		SCAF11	AC013731.1	0.369855	8.84481e-17	postive
HELLS	AC129510.2	0.668155	1.80306e-62	postive		BCL2A1	AC020612.3	0.340776	2.51553e-14	postive		IL1B	AC100821.2	0.388739	1.63715e-18	postive
HELLS	AC007038.1	0.668021	1.94649e-62	postive		BCL2L11	AC020612.3	0.53845	6.50927e-37	postive		SCAF11	AC100821.2	0.717505	5.49767e-76	postive
HELLS	AC036214.2	0.667901	2.08417e-62	postive		BCL2L12	AC020612.3	-0.348899	5.5015e-15	negative		SCAF11	LINC01811	0.538654	6.04875e-37	postive
ZEB1	AC099811.1	0.667829	2.17114e-62	postive		TNFSF10	AC010973.2	-0.313335	3.1046e-12	negative		IL1B	SMYD3-IT1	0.409332	1.55849e-20	postive
HELLS	Z69666.1	0.667812	2.19234e-62	postive		BAD	AC002558.2	-0.406374	3.10268e-20	negative		SCAF11	SMYD3-IT1	0.705412	2.04997e-72	postive
ZEB1	AC009093.1	0.667458	2.68248e-62	postive		BCL2A1	AC002558.2	0.352489	2.77031e-15	postive		SCAF11	AL031705.1	0.347163	7.64159e-15	postive
ZEB1	AC016405.1	0.667421	2.7387e-62	postive		BCL2L11	AC002558.2	0.511912	5.93202e-33	postive		SCAF11	AC011389.2	0.312869	3.35508e-12	postive
HELLS	ZBTB20-AS4	0.667401	2.77e-62	postive		BCL2L12	AC002558.2	-0.389925	1.26316e-18	negative		GSDMD	RAP2C-AS1	-0.314146	2.71113e-12	negative
ZEB1	AL596247.1	0.667345	2.85938e-62	postive		BCL2L11	NHS-AS1	0.346775	8.22109e-15	postive		SCAF11	RAP2C-AS1	0.667967	2.00733e-62	postive
LOX	WNT5A-AS1	0.667227	3.05781e-62	postive		BCL2L11	RNASEH2B-AS1	0.333641	9.2216e-14	postive		IL1B	AC010768.2	0.372398	5.2463e-17	postive
HELLS	AC087854.1	0.667102	3.28228e-62	postive		BAD	MIRLET7A1HG	-0.344232	1.32472e-14	negative		SCAF11	AC010768.2	0.415717	3.44205e-21	postive
HELLS	AL390195.2	0.66696	3.55778e-62	postive		BCL2L11	MIRLET7A1HG	0.434508	3.33686e-23	postive		IL1B	AC012358.4	0.601414	7.37782e-48	postive
ZEB1	AC099811.5	0.666936	3.60631e-62	postive		BCL2L12	MIRLET7A1HG	-0.331651	1.31698e-13	negative		SCAF11	AC012358.4	0.623628	2.49054e-52	postive
ZEB1	AP000763.3	0.66639	4.91439e-62	postive		BCL2L11	LINC00539	0.461553	2.48673e-26	postive		IL1B	AL356124.1	0.318675	1.26321e-12	postive
ZEB1	AC027097.2	0.66584	6.70664e-62	postive		BCL2L11	XXYLT1-AS2	0.435819	2.38844e-23	postive		SCAF11	AL356124.1	0.683818	1.80733e-66	postive
HELLS	PPP3CB-AS1	0.665756	7.03394e-62	postive		CASP10	XXYLT1-AS2	0.303822	1.47416e-11	postive		IL1B	AL365356.1	0.408454	1.91337e-20	postive
ZEB1	AL138921.2	0.6655	8.12678e-62	postive		FAS	XXYLT1-AS2	0.313985	2.78524e-12	postive		SCAF11	AL365356.1	0.732998	7.59231e-81	postive
HELLS	AP000593.3	0.665427	8.47108e-62	postive		BCL2L11	AC024361.3	0.331262	1.41153e-13	postive		SCAF11	AC018809.1	0.562695	7.50148e-41	postive
HELLS	AC068790.6	0.665376	8.716e-62	postive		BCL2L11	AC005332.7	0.430512	9.16408e-23	postive		IL1B	AC083906.3	0.390205	1.18785e-18	postive
ZEB1	AC004594.1	0.665256	9.32493e-62	postive		BCL2L11	AL136295.6	0.375357	2.84108e-17	postive		SCAF11	AC083906.3	0.490295	5.63698e-30	postive
ZEB1	AC040904.1	0.664972	1.09462e-61	postive		BCL2L2	AL136295.6	0.322306	6.78387e-13	postive		SCAF11	HCG27	0.339445	3.21404e-14	postive
ZEB1	AC108463.2	0.664957	1.10371e-61	postive		BAK1	AC125494.2	-0.320043	1.00034e-12	negative		IL1B	ITPRIP-AS1	0.731026	3.29296e-80	postive
ZEB1	AC018557.2	0.664636	1.32204e-61	postive		CASP7	TTC39A-AS1	0.305257	1.16964e-11	postive		SCAF11	ITPRIP-AS1	0.503781	8.28575e-32	postive
HELLS	ATP11A-AS1	0.664621	1.33352e-61	postive		BCL2L2	AC009163.7	0.319066	1.18189e-12	postive		IL1B	AC244093.5	0.319722	1.05672e-12	postive
ZEB1	AL035448.1	0.664339	1.56197e-61	postive		BAD	MCPH1-AS1	-0.370689	7.45553e-17	negative		SCAF11	AC244093.5	0.641284	3.77004e-56	postive
HELLS	JARID2-AS1	0.664329	1.57064e-61	postive		BCL2L11	MCPH1-AS1	0.357254	1.09933e-15	postive		SCAF11	AC246817.1	0.442988	3.73787e-24	postive
ZEB1	AC078795.1	0.66404	1.84819e-61	postive		BCL2L12	MCPH1-AS1	-0.371464	6.3587e-17	negative		IL1B	AC023157.2	0.417769	2.10385e-21	postive
HELLS	SAP30L-AS1	0.663998	1.89208e-61	postive		BCL2L2	MCPH1-AS1	0.344102	1.35717e-14	postive		SCAF11	AC023157.2	0.302778	1.74304e-11	postive
HELLS	AC019186.1	0.663965	1.92678e-61	postive		BCL2A1	LINC01705	0.413446	5.91175e-21	postive		IL1B	CERNA1	0.479592	1.40827e-28	postive
HELLS	SPAG5-AS1	0.663862	2.04224e-61	postive		BAD	AP001893.1	-0.35979	6.67998e-16	negative		SCAF11	CERNA1	0.621178	8.07475e-52	postive
HELLS	AL110115.1	0.663789	2.12713e-61	postive		BCL2L11	AP001893.1	0.455899	1.18247e-25	postive		SCAF11	AC037487.1	0.46213	2.11735e-26	postive
HELLS	AL359076.1	0.66377	2.14983e-61	postive		BCL2L12	AP001893.1	-0.309947	5.44188e-12	negative		IL1B	AL031651.2	0.446924	1.32487e-24	postive
HELLS	AC073073.2	0.663738	2.18867e-61	postive		BCL2A1	AP001434.1	0.703225	8.67876e-72	postive		SCAF11	AL031651.2	0.521618	2.31909e-34	postive
ZEB1	AP000866.6	0.663677	2.26422e-61	postive		BCL2L11	AP001434.1	0.456176	1.09626e-25	postive		SCAF11	AC073641.1	0.654243	4.06484e-59	postive
HELLS	AC019080.1	0.663586	2.38376e-61	postive		BCL2A1	POLH-AS1	0.324868	4.35232e-13	postive		SCAF11	MALINC1	0.43668	1.9157e-23	postive
HELLS	RHOA-IT1	0.663324	2.75916e-61	postive		BCL2L11	POLH-AS1	0.425855	2.92569e-22	postive		IL1B	AC090197.1	0.553993	2.11743e-39	postive
HELLS	DLEU1	0.663264	2.8542e-61	postive		FAS	POLH-AS1	0.403547	5.95482e-20	postive		SCAF11	AC090197.1	0.549477	1.15376e-38	postive
HELLS	BCL2L1-AS1	0.663208	2.94521e-61	postive		BCL2L11	AC022784.6	0.329711	1.8596e-13	postive		IL1B	SNHG22	0.306822	9.07398e-12	postive
ZEB1	AC068025.2	0.663113	3.10564e-61	postive		CSE1L	AC006333.1	0.340813	2.49854e-14	postive		SCAF11	SNHG22	0.446869	1.34416e-24	postive
ZEB1	AP001429.1	0.663041	3.23199e-61	postive		BMF	AC254633.1	0.342218	1.92703e-14	postive		IL1B	AL512656.2	0.337292	4.76415e-14	postive
ZEB1	AC012085.2	0.662996	3.31516e-61	postive		BCL2A1	AC004921.1	0.359327	7.31806e-16	postive		SCAF11	AL512656.2	0.637257	2.94913e-55	postive
HELLS	AC055822.1	0.662937	3.42514e-61	postive		BAD	ZFHX2-AS1	-0.355896	1.43298e-15	negative		IL1B	AL442125.1	0.524482	8.7329e-35	postive
ZEB1	RASA2-IT1	0.662933	3.43316e-61	postive		BCL2L11	ZFHX2-AS1	0.463021	1.65077e-26	postive		SCAF11	AL442125.1	0.641838	2.83493e-56	postive
ZEB1	AC020900.1	0.662904	3.49054e-61	postive		BCL2L12	ZFHX2-AS1	-0.315045	2.33226e-12	negative		IL1B	AL158163.1	0.406823	2.79619e-20	postive
HELLS	AC012181.1	0.662696	3.91852e-61	postive		BCL2L2	ZFHX2-AS1	0.425243	3.40311e-22	postive		SCAF11	AL158163.1	0.694183	2.94549e-69	postive
ZEB1	AL020997.2	0.662685	3.94386e-61	postive		BCL2L2	AC022034.1	0.303705	1.50215e-11	postive		SCAF11	AC074124.1	0.53027	1.17907e-35	postive
ZEB1	MANEA-DT	0.662462	4.46613e-61	postive		BAD	AC087588.2	-0.301682	2.07672e-11	negative		SCAF11	AC091153.2	0.472771	1.03291e-27	postive
ZEB1	AC005165.1	0.662272	4.9651e-61	postive		BCL2L11	AC087588.2	0.370217	8.21225e-17	postive		IL1B	AC010834.3	0.314718	2.46384e-12	postive
HELLS	KDM4A-AS1	0.662037	5.6601e-61	postive		BAD	AL683813.2	-0.342261	1.91172e-14	negative		SCAF11	AC010834.3	0.689777	4.66146e-68	postive
HELLS	AC092755.1	0.661844	6.29868e-61	postive		BCL2L11	AL683813.2	0.37547	2.77462e-17	postive		SCAF11	AL450344.3	0.522349	1.80907e-34	postive
ZEB1	CDC42-IT1	0.661608	7.18303e-61	postive		BCL2L12	AL683813.2	-0.336554	5.44834e-14	negative		IL1B	AC005224.3	0.511651	6.46467e-33	postive
ZEB1	AL049838.1	0.661459	7.80496e-61	postive		BCL2L11	AC119403.1	0.313122	3.2168e-12	postive		SCAF11	AC005224.3	0.419777	1.29547e-21	postive
ZEB1	PSMD6-AS2	0.661414	7.99924e-61	postive		BCL2L11	AC103923.1	0.443385	3.36862e-24	postive		IL1B	GK-IT1	0.797008	3.31918e-105	postive
HELLS	KLF7-IT1	0.661248	8.77401e-61	postive		BCL2L12	AC103923.1	-0.32128	8.0935e-13	negative		SCAF11	GK-IT1	0.51247	4.93786e-33	postive
HELLS	AL359880.1	0.661237	8.82916e-61	postive		BAD	AC108472.1	-0.315162	2.28698e-12	negative		IL1B	GEMIN7-AS1	0.381277	8.1699e-18	postive
ZEB1	AC025034.1	0.661169	9.16416e-61	postive		BCL2L11	AC108472.1	0.456895	9.0046e-26	postive		SCAF11	GEMIN7-AS1	0.407148	2.59304e-20	postive
HELLS	DHDDS-AS1	0.66116	9.2122e-61	postive		BCL2L11	AC095057.3	0.342878	1.70475e-14	postive		IL1B	AL031005.1	0.370791	7.30163e-17	postive
HELLS	AC130371.1	0.661159	9.21613e-61	postive		BCL2L12	AC095057.3	-0.313179	3.18618e-12	negative		SCAF11	AL031005.1	0.567379	1.19205e-41	postive
ZEB1	CD44-AS1	0.660959	1.02987e-60	postive		BCL2L11	PVT1	0.328498	2.30423e-13	postive		SCAF11	AC104365.2	0.444827	2.3061e-24	postive
ZEB1	AC005632.3	0.660908	1.05961e-60	postive		BAD	AL139807.1	-0.357431	1.06199e-15	negative		IL1B	ATP1B3-AS1	0.472646	1.07083e-27	postive
ZEB1	PAXBP1-AS1	0.660827	1.10788e-60	postive		BCL2A1	AL139807.1	0.407352	2.473e-20	postive		SCAF11	ATP1B3-AS1	0.722906	1.2119e-77	postive
HELLS	AL033504.1	0.660811	1.11766e-60	postive		BCL2L11	AL139807.1	0.522323	1.82529e-34	postive		IL1B	LINC02042	0.301783	2.0433e-11	postive
ZEB1	AL031770.1	0.660619	1.24335e-60	postive		BCL2L12	AL139807.1	-0.33609	5.92741e-14	negative		SCAF11	LINC02042	0.565628	2.37846e-41	postive
HELLS	AL731563.4	0.660611	1.24909e-60	postive		TNFRSF1A	AC123023.1	-0.316902	1.70619e-12	negative		IL1B	AC018413.1	0.308386	7.03071e-12	postive
ZEB1	AC130371.1	0.660386	1.41418e-60	postive		BCL2L11	AC007991.4	0.464168	1.1971e-26	postive		SCAF11	AC018413.1	0.348014	6.50658e-15	postive
HELLS	KANSL1L-AS1	0.660108	1.64901e-60	postive		CASP10	AC007991.4	0.383957	4.60833e-18	postive		IL1B	AL138963.1	0.356237	1.34086e-15	postive
HELLS	AC011472.4	0.659877	1.87395e-60	postive		FAS	AC007991.4	0.322417	6.65435e-13	postive		SCAF11	AL138963.1	0.666874	3.73672e-62	postive
ZEB1	AC103740.1	0.659688	2.08002e-60	postive		BAD	AC091185.1	-0.342122	1.96149e-14	negative		IL1B	PEF1-AS1	0.532524	5.34941e-36	postive
HELLS	AC002306.1	0.65962	2.15946e-60	postive		BCL2L11	AC091185.1	0.478993	1.68094e-28	postive		SCAF11	PEF1-AS1	0.525611	5.92775e-35	postive
HELLS	AL606834.2	0.65949	2.32025e-60	postive		BCL2L12	AC091185.1	-0.350555	4.01295e-15	negative		SCAF11	LINC00626	0.431061	7.98325e-23	postive
HELLS	ITFG1-AS1	0.65942	2.41092e-60	postive		BCL2L2	AC091185.1	0.372252	5.40654e-17	postive		GSDMD	AC005034.4	-0.37801	1.63047e-17	negative
HELLS	AL356599.1	0.659367	2.48191e-60	postive		BCL2L11	AC087277.2	0.428714	1.43774e-22	postive		IL1B	AC005034.4	0.314008	2.77439e-12	postive
HELLS	AC015813.1	0.659192	2.73364e-60	postive		BAD	AL021328.1	-0.372394	5.25104e-17	negative		SCAF11	AC005034.4	0.703828	5.83699e-72	postive
HELLS	AC073529.1	0.65918	2.75231e-60	postive		BCL2L11	AL021328.1	0.496824	7.48084e-31	postive		PLCG1	AL590617.2	0.316853	1.72019e-12	postive
ZEB1	LINC-PINT	0.659164	2.776e-60	postive		BCL2L12	AL021328.1	-0.363881	2.96214e-16	negative		IL1B	AL137779.2	0.481853	7.2052e-29	postive
ZEB1	AC016949.1	0.659106	2.86641e-60	postive		BCL2L11	AC093382.1	0.354612	1.8386e-15	postive		SCAF11	AL137779.2	0.495167	1.25436e-30	postive
HELLS	AC012464.2	0.659012	3.01768e-60	postive		BCL2L11	AC005387.2	0.370437	7.85152e-17	postive		SCAF11	AC079336.1	0.574089	8.11552e-43	postive
HELLS	AC018809.1	0.658979	3.07288e-60	postive		BAD	AC015914.1	-0.387342	2.21868e-18	negative		IL1B	HIF1A-AS3	0.68606	4.61089e-67	postive
HELLS	AC012213.3	0.658903	3.20513e-60	postive		BCL2L11	AC015914.1	0.483228	4.78022e-29	postive		SCAF11	HIF1A-AS3	0.486055	2.04467e-29	postive
ZEB1	AC105429.1	0.658869	3.26426e-60	postive		BCL2L12	AC015914.1	-0.363513	3.18786e-16	negative		IL1B	NDUFV2-AS1	0.474394	6.45622e-28	postive
ZEB1	DIAPH2-AS1	0.658729	3.52724e-60	postive		BCL2L11	AC016738.1	0.302268	1.89103e-11	postive		SCAF11	NDUFV2-AS1	0.612234	5.42433e-50	postive
HELLS	AC007319.1	0.658595	3.79595e-60	postive		BAD	AC007128.2	-0.302286	1.88582e-11	negative		IL1B	AC131159.1	0.329631	1.88609e-13	postive
HELLS	AC048344.4	0.658519	3.95805e-60	postive		BCL2L11	AC007128.2	0.323841	5.20225e-13	postive		SCAF11	AC131159.1	0.678255	5.08082e-65	postive
HELLS	AC092168.2	0.658414	4.19353e-60	postive		CSE1L	SATB2-AS1	0.310261	5.1672e-12	postive		IL1B	AL358216.1	0.486585	1.7427e-29	postive
ZEB1	LRRC8C-DT	0.65841	4.2014e-60	postive		BAD	INO80-AS1	-0.381834	7.25608e-18	negative		SCAF11	AL358216.1	0.675129	3.20624e-64	postive
HELLS	ZNF571-AS1	0.658183	4.75911e-60	postive		BCL2L11	INO80-AS1	0.48179	7.34088e-29	postive		GSDMD	AC073073.2	-0.362993	3.53694e-16	negative
HELLS	DLEU2	0.658108	4.95865e-60	postive		BCL2L12	INO80-AS1	-0.347334	7.39823e-15	negative		SCAF11	AC073073.2	0.676784	1.21255e-64	postive
HELLS	AC006017.1	0.658009	5.2352e-60	postive		BCL2L11	AL049840.6	0.382521	6.26698e-18	postive		SCAF11	AC026771.1	0.621433	7.14945e-52	postive
HELLS	AC007938.3	0.65796	5.37914e-60	postive		BCL2L2	AL049840.6	0.350839	3.80102e-15	postive		IL1B	CLMAT3	0.496318	8.76275e-31	postive
ZEB1	FTX	0.657948	5.41462e-60	postive		BCL2L11	AC092944.1	0.38762	2.08867e-18	postive		SCAF11	CLMAT3	0.303812	1.47632e-11	postive
HELLS	CFAP44-AS1	0.657923	5.48687e-60	postive		BCL2L10	LINC01816	0.341726	2.11079e-14	postive		PLCG1	AC145207.1	0.387329	2.22511e-18	postive
ZEB1	NPTN-IT1	0.657866	5.66349e-60	postive		BAD	LPP-AS1	-0.3563	1.32446e-15	negative		CASP6	LINC00992	0.346203	9.15556e-15	postive
ZEB1	AL365356.1	0.657744	6.05262e-60	postive		BCL2A1	LPP-AS1	0.34363	1.4822e-14	postive		SCAF11	AL592301.1	0.441277	5.84238e-24	postive
ZEB1	AL050320.1	0.657733	6.08868e-60	postive		BCL2L11	LPP-AS1	0.503301	9.66119e-32	postive		SCAF11	PIK3IP1-AS1	0.362464	3.93105e-16	postive
HELLS	AP005131.7	0.65746	7.07082e-60	postive		BCL2L12	LPP-AS1	-0.331417	1.37323e-13	negative		TNF	LINC01857	0.330208	1.7026e-13	postive
ZEB1	AC027808.2	0.657424	7.21315e-60	postive		BAD	AC073957.1	-0.356924	1.17266e-15	negative		SCAF11	AC010525.1	0.369546	9.4207e-17	postive
HELLS	AC026368.1	0.657367	7.44093e-60	postive		BCL2L11	AC073957.1	0.489579	7.01629e-30	postive		IL1B	AL391832.3	0.619259	2.01434e-51	postive
HELLS	AC008115.3	0.657286	7.77473e-60	postive		BCL2L12	AC073957.1	-0.338825	3.60082e-14	negative		SCAF11	AL391832.3	0.339283	3.31057e-14	postive
HELLS	SNHG26	0.657166	8.30164e-60	postive		BAD	AC144548.1	-0.343094	1.63772e-14	negative		GSDMD	AC098484.1	-0.329826	1.82207e-13	negative
HELLS	AC007620.3	0.656787	1.02141e-59	postive		BCL2L11	AC144548.1	0.326839	3.08454e-13	postive		PYCARD	AC098484.1	-0.35808	9.35122e-16	negative
PTGS2	NCOA7-AS1	0.656672	1.08741e-59	postive		CSE1L	AL136162.1	0.309199	6.15323e-12	postive		SCAF11	AC098484.1	0.648551	8.5149e-58	postive
HELLS	Z68871.1	0.656606	1.12711e-59	postive		BCL2A1	AC011676.1	0.341841	2.06615e-14	postive		SCAF11	EIPR1-IT1	0.507372	2.60829e-32	postive
HELLS	AL021328.1	0.656482	1.20591e-59	postive		BCL2L11	AC011676.1	0.482404	6.11448e-29	postive		SCAF11	AC007114.2	0.628963	1.85407e-53	postive
HELLS	AC066613.1	0.656391	1.26699e-59	postive		BCL2L11	AP003086.1	0.324923	4.31114e-13	postive		IL1B	SAP30L-AS1	0.395324	3.82831e-19	postive
ZEB1	AL359076.1	0.656303	1.32971e-59	postive		BAD	AL122035.1	-0.360644	5.64225e-16	negative		SCAF11	SAP30L-AS1	0.688468	1.04905e-67	postive
ZEB1	SMYD3-IT1	0.6563	1.33176e-59	postive		BCL2	AL122035.1	0.314491	2.55925e-12	postive		SCAF11	WARS2-AS1	0.572454	1.57094e-42	postive
ZEB1	AC080013.1	0.656263	1.35864e-59	postive		BCL2A1	AL122035.1	0.357941	9.6101e-16	postive		PLCG1	SNHG17	0.394683	4.41614e-19	postive
HELLS	AC026356.2	0.656211	1.39754e-59	postive		BCL2L11	AL122035.1	0.55614	9.37403e-40	postive		SCAF11	AC004691.1	0.423522	5.19794e-22	postive
HELLS	AC011676.2	0.656184	1.41867e-59	postive		BCL2L12	AL122035.1	-0.391601	8.7413e-19	negative		SCAF11	SMC5-AS1	0.579365	9.39482e-44	postive
ZEB1	AC006059.1	0.656125	1.4648e-59	postive		BCL2L2	AL122035.1	0.374959	3.08619e-17	postive		IL1B	KIF26B-AS1	0.499596	3.1325e-31	postive
ZEB1	AL157938.3	0.655809	1.73905e-59	postive		FAS	SNHG32	-0.31959	1.08081e-12	negative		SCAF11	KIF26B-AS1	0.531827	6.83479e-36	postive
HELLS	LINC01409	0.655727	1.81885e-59	postive		BCL2	LINC00996	0.381207	8.29179e-18	postive		IL1B	AC090877.2	0.518872	5.86477e-34	postive
HELLS	AC087683.2	0.655655	1.89093e-59	postive		BCL2L11	LINC00996	0.370789	7.30525e-17	postive		SCAF11	AC090877.2	0.307586	8.01231e-12	postive
HELLS	RUSC1-AS1	0.655543	2.00945e-59	postive		CASP10	LINC00996	0.3897	1.32707e-18	postive		GSDMD	AC018645.3	-0.307865	7.65589e-12	negative
ZEB1	AL022097.1	0.65549	2.06843e-59	postive		FAS	LINC00996	0.404957	4.30556e-20	postive		SCAF11	AC018645.3	0.508235	1.97206e-32	postive
ZEB1	FAM66C	0.655225	2.38794e-59	postive		TNFSF10	LINC00996	0.333324	9.76248e-14	postive		IL1B	PCBP1-AS1	0.37385	3.88554e-17	postive
HELLS	AC024075.3	0.655062	2.60969e-59	postive		BAD	AC083843.3	-0.336973	5.04891e-14	negative		SCAF11	PCBP1-AS1	0.598682	2.47656e-47	postive
CRYAB	ZNF667-AS1	0.654964	2.75181e-59	postive		BCL2L11	AC083843.3	0.40146	9.5971e-20	postive		IL1B	AC004466.3	0.503379	9.42328e-32	postive
HELLS	STX18-AS1	0.654894	2.85748e-59	postive		BCL2L11	ALOX12-AS1	0.54347	1.05716e-37	postive		SCAF11	AC004466.3	0.605552	1.15228e-48	postive
HELLS	MIR181A2HG	0.654691	3.18953e-59	postive		BCL2L12	ALOX12-AS1	-0.380099	1.04907e-17	negative		PYCARD	AC148476.1	0.328432	2.33105e-13	postive
ZEB1	AC004918.5	0.654635	3.28777e-59	postive		BCL2L2	ALOX12-AS1	0.34291	1.69451e-14	postive		SCAF11	AC095055.1	0.684406	1.26451e-66	postive
ZEB1	AL355073.2	0.654634	3.28892e-59	postive		BAD	AC131953.2	-0.345538	1.03753e-14	negative		IL1B	AL138759.1	0.364547	2.59158e-16	postive
HELLS	SNHG16	0.654515	3.50751e-59	postive		BCL2L11	AC131953.2	0.510629	9.03548e-33	postive		SCAF11	AL138759.1	0.68389	1.7294e-66	postive
HELLS	AC011815.1	0.654363	3.80898e-59	postive		BCL2L12	AC131953.2	-0.310415	5.03798e-12	negative		SCAF11	AC009262.1	0.500723	2.19351e-31	postive
HELLS	AC012447.1	0.654345	3.84693e-59	postive		BCL2L2	AC131953.2	0.346637	8.43733e-15	postive		SCAF11	AP006621.2	0.347223	7.55544e-15	postive
HELLS	AC073957.1	0.654263	4.0195e-59	postive		BCL2L11	AC127024.2	0.30218	1.91784e-11	postive		IL1B	GSEC	0.398132	2.03957e-19	postive
ZEB1	AC027279.1	0.654023	4.57685e-59	postive		CRADD	MRPL20-AS1	-0.303537	1.5432e-11	negative		IL1B	AC027808.2	0.407551	2.36136e-20	postive
ZEB1	AC133644.1	0.654012	4.60324e-59	postive		FAS	MRPL20-AS1	-0.360402	5.91814e-16	negative		SCAF11	AC027808.2	0.595152	1.1643e-46	postive
HELLS	AC110769.2	0.653855	5.011e-59	postive		BAD	ST7-OT4	-0.382011	6.98696e-18	negative		SCAF11	ARRDC3-AS1	0.621798	6.00208e-52	postive
HELLS	AC027279.1	0.653769	5.24954e-59	postive		BCL2L11	ST7-OT4	0.518185	7.38804e-34	postive		SCAF11	SMG7-AS1	0.446404	1.52064e-24	postive
ZEB1	CHRM3-AS2	0.653723	5.38187e-59	postive		BCL2L12	ST7-OT4	-0.356188	1.3536e-15	negative		SCAF11	AL136304.1	0.333354	9.71103e-14	postive
ZEB1	MIRLET7A1HG	0.653704	5.43652e-59	postive		BAD	AC244093.4	-0.39739	2.41058e-19	negative		IL1B	AC005540.1	0.354678	1.81519e-15	postive
HELLS	LPP-AS1	0.653615	5.70276e-59	postive		BCL2A1	AC244093.4	0.308158	7.29743e-12	postive		SCAF11	AC005540.1	0.578116	1.57029e-43	postive
HELLS	AC026401.1	0.653346	6.5933e-59	postive		BCL2L11	AC244093.4	0.512539	4.82718e-33	postive		IL1B	AC114781.2	0.493426	2.15213e-30	postive
ZEB1	AL132989.2	0.653119	7.45001e-59	postive		BCL2L12	AC244093.4	-0.351553	3.31566e-15	negative		SCAF11	AC114781.2	0.582115	3.00463e-44	postive
ZEB1	N4BP2L2-IT2	0.653	7.93959e-59	postive		BAD	AC079684.2	-0.345293	1.08616e-14	negative		IL1B	LINC02649	0.641761	2.94928e-56	postive
HELLS	AC004943.3	0.652975	8.04926e-59	postive		BCL2L11	AC079684.2	0.477604	2.52884e-28	postive		SCAF11	LINC02649	0.494158	1.71589e-30	postive
PTGS2	AL596325.2	0.652958	8.12322e-59	postive		BCL2L12	AC079684.2	-0.307458	8.18117e-12	negative		PLCG1	AL139349.1	0.518064	7.69407e-34	postive
HELLS	HCG18	0.652951	8.15302e-59	postive		BCL2L11	AC018521.6	0.329821	1.82362e-13	postive		SCAF11	MIR924HG	0.302609	1.79073e-11	postive
ZEB1	ZRANB2-AS1	0.652925	8.26783e-59	postive		BCL2L2	AC018521.6	0.365049	2.34317e-16	postive		GSDMD	AP000873.2	-0.301351	2.18921e-11	negative
HELLS	LAMC1-AS1	0.652906	8.35332e-59	postive		BAD	PLCG1-AS1	-0.379952	1.08219e-17	negative		IL1B	AP000873.2	0.310957	4.60688e-12	postive
HELLS	AC025569.1	0.652871	8.51232e-59	postive		BCL2A1	PLCG1-AS1	0.357062	1.14146e-15	postive		SCAF11	AP000873.2	0.67079	3.98603e-63	postive
ZEB1	LINC01355	0.652869	8.51971e-59	postive		BCL2L11	PLCG1-AS1	0.496008	9.65247e-31	postive		IL1B	FAM53B-AS1	0.346342	8.91905e-15	postive
HELLS	MACC1-AS1	0.65283	8.70067e-59	postive		BCL2L12	PLCG1-AS1	-0.351975	3.05786e-15	negative		SCAF11	FAM53B-AS1	0.636406	4.53578e-55	postive
ZEB1	AC007014.2	0.652775	8.96437e-59	postive		BAD	AL355312.2	-0.385632	3.21318e-18	negative		IL1B	LINC00900	0.404742	4.52401e-20	postive
HELLS	POLH-AS1	0.652572	9.99232e-59	postive		BCL2L11	AL355312.2	0.456941	8.89135e-26	postive		SCAF11	LINC00900	0.337485	4.5993e-14	postive
HELLS	AC004253.1	0.652544	1.01451e-58	postive		BCL2L12	AL355312.2	-0.332463	1.13927e-13	negative		TNF	LINC00900	0.34547	1.05072e-14	postive
ZEB1	KCNQ1OT1	0.652454	1.06464e-58	postive		BID	AC008267.5	0.36336	3.2872e-16	postive		SCAF11	HAND2-AS1	0.312142	3.78591e-12	postive
HELLS	AF230666.2	0.652421	1.08366e-58	postive		RIPK1	AC008267.5	-0.311999	3.87692e-12	negative		CASP6	AP001372.2	0.361201	5.05289e-16	postive
HELLS	AL354892.3	0.652339	1.13278e-58	postive		BAK1	LINC00997	-0.374071	3.71161e-17	negative		IL1B	AC020661.3	0.518671	6.27518e-34	postive
HELLS	AC026771.1	0.652165	1.24322e-58	postive		BCL2L11	LINC00997	0.337553	4.54312e-14	postive		SCAF11	AC020661.3	0.630999	6.78734e-54	postive
ZEB1	AL137003.1	0.652122	1.27214e-58	postive		TNFRSF10A	LINC00997	-0.313696	2.92312e-12	negative		IL1B	AL513327.1	0.522406	1.77476e-34	postive
HELLS	AC074050.4	0.652081	1.30096e-58	postive		BAD	AC073575.4	-0.327411	2.79014e-13	negative		SCAF11	AL513327.1	0.670766	4.04183e-63	postive
HELLS	AC004908.2	0.651841	1.47937e-58	postive		BCL2L11	AC073575.4	0.410616	1.15331e-20	postive		IL1B	AC007216.2	0.307269	8.43768e-12	postive
ZEB1	LINC01409	0.651727	1.57245e-58	postive		BCL2L11	AL445490.1	0.421597	8.32321e-22	postive		SCAF11	AC007216.2	0.62007	1.3702e-51	postive
ZEB1	AC010976.1	0.651687	1.60636e-58	postive		BCL2L2	AL445490.1	0.335544	6.54315e-14	postive		SCAF11	PPP1R12A-AS1	0.463337	1.51115e-26	postive
HELLS	PITRM1-AS1	0.65165	1.63821e-58	postive		CASP10	AL445490.1	0.343201	1.6053e-14	postive		SCAF11	AL353708.3	0.506074	3.96727e-32	postive
HELLS	AC007314.1	0.651554	1.72415e-58	postive		BAD	ALMS1-IT1	-0.359732	6.75582e-16	negative		IL1B	MANEA-DT	0.335429	6.68094e-14	postive
ZEB1	AL359922.2	0.651457	1.81678e-58	postive		BCL2L11	ALMS1-IT1	0.53133	8.13779e-36	postive		SCAF11	MANEA-DT	0.633833	1.6548e-54	postive
HELLS	AC092802.4	0.651362	1.91082e-58	postive		BCL2L12	ALMS1-IT1	-0.309311	6.04127e-12	negative		SCAF11	AL139099.3	0.442329	4.44079e-24	postive
HELLS	AC022558.3	0.651343	1.93043e-58	postive		BCL2L2	LINC01588	0.302533	1.81278e-11	postive		SCAF11	MORF4L2-AS1	0.530902	9.45397e-36	postive
HELLS	AL049840.2	0.651321	1.95315e-58	postive		BAK1	UBR5-AS1	-0.348223	6.25393e-15	negative		IL1B	AL021392.1	0.311251	4.38815e-12	postive
HELLS	AL133330.1	0.65128	1.99641e-58	postive		CSE1L	UBR5-AS1	0.376078	2.44423e-17	postive		CASP6	LINC01843	0.33828	3.97793e-14	postive
ZEB1	AC107959.1	0.651098	2.19979e-58	postive		TNFRSF1A	UBR5-AS1	-0.329246	2.01904e-13	negative		SCAF11	AC116914.2	0.433159	4.70007e-23	postive
HELLS	AL157394.1	0.651078	2.22449e-58	postive		BAD	MAL2-AS1	-0.344727	1.20758e-14	negative		SCAF11	AL512303.1	0.458412	5.9346e-26	postive
HELLS	AL121895.1	0.650719	2.69309e-58	postive		BCL2A1	MAL2-AS1	0.337307	4.75134e-14	postive		PYCARD	AP001505.1	0.302859	1.72042e-11	postive
ZEB1	AC100821.2	0.6507	2.72069e-58	postive		BCL2L11	MAL2-AS1	0.493343	2.20767e-30	postive		SCAF11	POC1B-AS1	0.521641	2.30107e-34	postive
ZEB1	AL390195.3	0.650645	2.80183e-58	postive		BCL2L12	MAL2-AS1	-0.321778	7.42859e-13	negative		PLCG1	AC109460.2	0.426535	2.4722e-22	postive
HELLS	LINC01473	0.650641	2.80717e-58	postive		BCL2A1	LINC01914	0.486062	2.04081e-29	postive		SCAF11	AC109460.2	0.461256	2.70102e-26	postive
ZEB1	AC058791.1	0.650559	2.93241e-58	postive		BCL2L11	LINC01914	0.49239	2.9629e-30	postive		PYCARD	MCF2L-AS1	0.483391	4.55306e-29	postive
HELLS	AC083805.2	0.650507	3.01557e-58	postive		BAD	AC073333.1	-0.396489	2.95052e-19	negative		SCAF11	MCF2L-AS1	-0.368935	1.06706e-16	negative
ZEB1	ZBTB20-AS4	0.650457	3.09753e-58	postive		BCL2L11	AC073333.1	0.468926	3.11456e-27	postive		NOD2	AC074117.1	0.307645	7.93533e-12	postive
HELLS	AC073641.1	0.650431	3.1395e-58	postive		BCL2L12	AC073333.1	-0.33278	1.07622e-13	negative		PLCG1	AC074117.1	0.486731	1.66735e-29	postive
ZEB1	AP000786.1	0.650339	3.29853e-58	postive		BID	AC124248.1	0.408233	2.01436e-20	postive		PLCG1	AC022167.2	0.351949	3.07285e-15	postive
HELLS	AC079385.1	0.650217	3.51887e-58	postive		BCL2L12	FAM160A1-DT	-0.303481	1.55716e-11	negative		GSDMD	AL031985.3	-0.395944	3.33299e-19	negative
HELLS	AC020663.3	0.650216	3.52013e-58	postive		CSE1L	FAM160A1-DT	0.314396	2.60006e-12	postive		PYCARD	AL031985.3	-0.334394	8.05287e-14	negative
ZEB1	AC090948.1	0.650147	3.65273e-58	postive		BCL2L1	SLCO4A1-AS1	0.386953	2.4145e-18	postive		SCAF11	AL031985.3	0.453529	2.25419e-25	postive
ZEB1	RERE-AS1	0.650098	3.74857e-58	postive		CASP7	LINC01133	0.352283	2.88187e-15	postive		PLCG1	LENG8-AS1	0.49607	9.46677e-31	postive
ZEB1	AL133371.2	0.649858	4.25805e-58	postive		BCL2L11	CIRBP-AS1	0.308044	7.43459e-12	postive		SCAF11	AC009812.3	0.681119	9.20424e-66	postive
ZEB1	AC134407.1	0.649743	4.52618e-58	postive		BCL2L2	CIRBP-AS1	0.308929	6.43264e-12	postive		SCAF11	SNHG14	0.573215	1.15571e-42	postive
HELLS	AC048341.1	0.649696	4.64192e-58	postive		BCL2L1	AL009178.2	0.362491	3.90935e-16	postive		IL1B	AC040934.1	0.358408	8.7679e-16	postive
ZEB1	AC244093.3	0.649548	5.02187e-58	postive		BAD	AC005261.1	-0.41022	1.26571e-20	negative		SCAF11	AC040934.1	0.583672	1.56868e-44	postive
HELLS	AC131934.1	0.649447	5.2983e-58	postive		BAK1	AC005261.1	-0.351702	3.22213e-15	negative		SCAF11	AC023043.4	0.328606	2.26065e-13	postive
ZEB1	AC090948.2	0.64943	5.34437e-58	postive		BCL2L11	AC005261.1	0.459226	4.7413e-26	postive		SCAF11	LINC02156	0.659835	1.91778e-60	postive
ZEB1	AC083806.2	0.649405	5.41626e-58	postive		BCL2L12	AC005261.1	-0.348922	5.47688e-15	negative		SCAF11	AC013472.2	0.352055	3.0113e-15	postive
HELLS	MALAT1	0.649303	5.71833e-58	postive		TNFRSF1A	AC005261.1	-0.324787	4.41409e-13	negative		GSDMD	AL117332.1	0.318392	1.32539e-12	postive
ZEB1	LURAP1L-AS1	0.649043	6.56361e-58	postive		BAD	Z82243.1	-0.354567	1.85469e-15	negative		IL1B	GK-AS1	0.796162	7.92233e-105	postive
HELLS	AC016394.3	0.648946	6.90941e-58	postive		BCL2L11	Z82243.1	0.523171	1.36746e-34	postive		SCAF11	GK-AS1	0.547165	2.72099e-38	postive
HELLS	AC103591.3	0.648745	7.68409e-58	postive		BCL2L12	Z82243.1	-0.3061	1.02025e-11	negative		IL1B	AC066613.1	0.492045	3.29456e-30	postive
HELLS	AL161891.1	0.648731	7.7416e-58	postive		BCL2L2	Z82243.1	0.325975	3.58824e-13	postive		SCAF11	AC066613.1	0.697396	3.80813e-70	postive
ZEB1	AC006042.3	0.648511	8.69651e-58	postive		BAD	AC087392.2	-0.324852	4.36432e-13	negative		SCAF11	AC245884.8	0.398454	1.89704e-19	postive
ZEB1	AL158163.2	0.648406	9.19187e-58	postive		BCL2A1	AC087392.2	0.379335	1.23313e-17	postive		GSDMD	NNT-AS1	-0.337364	4.7021e-14	negative
ZEB1	AC000123.1	0.648392	9.26314e-58	postive		BCL2L11	AC087392.2	0.417883	2.04732e-21	postive		SCAF11	NNT-AS1	0.471531	1.47662e-27	postive
ZEB1	AL139807.1	0.648289	9.78064e-58	postive		BAD	ITGA6-AS1	-0.395494	3.68554e-19	negative		IL1B	AL049840.2	0.493445	2.13969e-30	postive
HELLS	AL158071.1	0.648217	1.0158e-57	postive		BCL2L11	ITGA6-AS1	0.45646	1.01446e-25	postive		SCAF11	AL049840.2	0.657966	5.35948e-60	postive
PTGS2	AC069549.1	0.647936	1.17819e-57	postive		BCL2L12	ITGA6-AS1	-0.363424	3.24554e-16	negative		SCAF11	NSMCE1-DT	0.482929	5.22728e-29	postive
PTGS2	AP000692.1	0.647853	1.23073e-57	postive		BCL2L12	MNX1-AS1	0.318076	1.3986e-12	postive		SCAF11	AC000061.1	0.589415	1.38309e-45	postive
ZEB1	AC083805.2	0.647837	1.24165e-57	postive		BAD	UBE2R2-AS1	-0.333246	9.90082e-14	negative		SCAF11	AC008764.2	0.410665	1.13996e-20	postive
ZEB1	AC005776.2	0.647752	1.29836e-57	postive		BCL2L11	UBE2R2-AS1	0.475195	5.11472e-28	postive		IL1B	C1orf147	0.337871	4.28649e-14	postive
ZEB1	AC011933.2	0.647709	1.3283e-57	postive		BAD	AL133230.2	-0.396429	2.99008e-19	negative		SCAF11	C1orf147	0.502919	1.09135e-31	postive
HELLS	PKP4-AS1	0.647668	1.35729e-57	postive		BCL2A1	AL133230.2	0.347588	7.05234e-15	postive		SCAF11	AC024075.1	0.621017	8.72163e-52	postive
ZEB1	ARAP1-AS2	0.647607	1.40111e-57	postive		BCL2L11	AL133230.2	0.557259	6.11523e-40	postive		SCAF11	ZNF674-AS1	0.312706	3.44757e-12	postive
ZEB1	USP3-AS1	0.647571	1.42812e-57	postive		BCL2L12	AL133230.2	-0.372247	5.41295e-17	negative		IL1B	AC079793.1	0.63948	9.51073e-56	postive
ZEB1	LINC02035	0.647515	1.47078e-57	postive		BAK1	AC100861.1	0.328741	2.20766e-13	postive		SCAF11	AC079793.1	0.685012	8.74533e-67	postive
HELLS	AC004067.1	0.647509	1.47569e-57	postive		TNFRSF10A	AC100861.1	0.63595	5.70941e-55	postive		IL1B	AP000786.1	0.307716	7.84375e-12	postive
ZEB1	GNG12-AS1	0.647456	1.51743e-57	postive		TNFRSF10B	AC100861.1	0.557588	5.39055e-40	postive		SCAF11	AP000786.1	0.656011	1.55876e-59	postive
ZEB1	AL049840.2	0.647347	1.60725e-57	postive		BAD	AC244093.3	-0.367543	1.41621e-16	negative		SCAF11	AP005329.2	0.339535	3.16125e-14	postive
HELLS	AL358216.1	0.64734	1.61321e-57	postive		BCL2L11	AC244093.3	0.485458	2.44808e-29	postive		CASP6	AC092535.5	-0.306997	8.81891e-12	negative
HELLS	AL807757.2	0.647312	1.63707e-57	postive		BCL2L12	AC244093.3	-0.331203	1.42668e-13	negative		IL1B	AC092535.5	0.336096	5.92026e-14	postive
LOX	LINC01235	0.647279	1.66602e-57	postive		BCL2A1	LUCAT1	0.583907	1.42172e-44	postive		SCAF11	LINC02254	0.492943	2.49842e-30	postive
HELLS	AC090589.2	0.647215	1.72311e-57	postive		BCL2L11	LUCAT1	0.405928	3.44039e-20	postive		IL1B	AC092802.4	0.385763	3.1236e-18	postive
LOX	MIR3945HG	0.647164	1.76921e-57	postive		BAD	NFYC-AS1	-0.320416	9.38511e-13	negative		SCAF11	AC092802.4	0.671857	2.15272e-63	postive
HELLS	AC009812.3	0.64707	1.85935e-57	postive		BCL2L11	NFYC-AS1	0.402993	6.76093e-20	postive		TNF	AL844908.1	0.329885	1.80303e-13	postive
HELLS	FTX	0.646973	1.95667e-57	postive		BCL2L1	EP300-AS1	-0.31782	1.46043e-12	negative		IL1B	AC060766.7	0.561609	1.14409e-40	postive
HELLS	OIP5-AS1	0.646956	1.97456e-57	postive		BCL2L11	EP300-AS1	0.470704	1.8729e-27	postive		SCAF11	AC060766.7	0.586024	5.83648e-45	postive
HELLS	AC092681.2	0.64676	2.18809e-57	postive		BAD	AL158212.2	-0.335233	6.92134e-14	negative		SCAF11	AL121992.3	0.306345	9.80522e-12	postive
ZEB1	AC109597.2	0.646643	2.3266e-57	postive		BCL2L11	AL158212.2	0.41432	4.80359e-21	postive		SCAF11	AC138207.5	0.458727	5.44105e-26	postive
HELLS	YEATS2-AS1	0.646502	2.50543e-57	postive		BCL2L12	AL158212.2	-0.302553	1.80674e-11	negative		SCAF11	AC008870.4	0.494304	1.63964e-30	postive
ZEB1	RSF1-IT1	0.646178	2.9691e-57	postive		BAD	AC006111.2	-0.34038	2.70613e-14	negative		IL1B	AC090617.5	0.405607	3.70528e-20	postive
HELLS	AC026202.2	0.6461	3.09389e-57	postive		BCL2L11	AC006111.2	0.442713	4.01614e-24	postive		SCAF11	AC013652.1	0.482825	5.39237e-29	postive
ZEB1	TH2LCRR	0.646038	3.19598e-57	postive		BAD	AC090510.2	-0.351796	3.16486e-15	negative		NOD2	AL139035.1	0.344285	1.3117e-14	postive
ZEB1	ASAP1-IT2	0.645978	3.29823e-57	postive		BCL2L11	AC090510.2	0.504719	6.13494e-32	postive		IL1B	AC092794.1	0.414639	4.45213e-21	postive
HELLS	AL138820.1	0.645854	3.51853e-57	postive		BCL2L2	AC090510.2	0.310719	4.7911e-12	postive		SCAF11	AC092794.1	0.69407	3.16415e-69	postive
HELLS	ACBD3-AS1	0.645753	3.70927e-57	postive		BAD	AL162734.1	-0.309853	5.5261e-12	negative		PYCARD	OTUD6B-AS1	-0.335366	6.75686e-14	negative
ZEB1	AC025569.1	0.645739	3.73648e-57	postive		BCL2L11	AL162734.1	0.354168	2.00386e-15	postive		SCAF11	OTUD6B-AS1	0.405936	3.43443e-20	postive
LOX	AP000695.1	0.645604	4.01031e-57	postive		BAD	AC087521.2	-0.382156	6.77539e-18	negative		IL1B	LINC02656	0.776596	1.45637e-96	postive
ZEB1	AC007036.2	0.64557	4.08228e-57	postive		BCL2A1	AC087521.2	0.30012	2.66214e-11	postive		SCAF11	LINC02656	0.506607	3.3407e-32	postive
ZEB1	AC022079.1	0.64555	4.12427e-57	postive		BCL2L11	AC087521.2	0.528015	2.58409e-35	postive		SCAF11	AC023024.1	0.369312	9.88191e-17	postive
HELLS	ADNP-AS1	0.645531	4.16611e-57	postive		BCL2L12	AC087521.2	-0.360959	5.30034e-16	negative		SCAF11	AL121672.1	0.575579	4.43246e-43	postive
HELLS	EPN2-AS1	0.64504	5.38314e-57	postive		BAD	AL133243.3	-0.397721	2.23764e-19	negative		IL1B	YEATS2-AS1	0.31509	2.31462e-12	postive
ZEB1	AC068790.3	0.644705	6.41199e-57	postive		BCL2A1	AL133243.3	0.310503	4.96529e-12	postive		SCAF11	YEATS2-AS1	0.644389	7.55777e-57	postive
ZEB1	AC131971.1	0.644475	7.22809e-57	postive		BCL2L11	AL133243.3	0.513091	4.02388e-33	postive		SCAF11	ADNP-AS1	0.661543	7.4459e-61	postive
HELLS	AP002993.1	0.644386	7.5714e-57	postive		BCL2L12	AL133243.3	-0.369579	9.3572e-17	negative		IL1B	AL035448.1	0.382037	6.94917e-18	postive
HELLS	AF230666.1	0.644166	8.4875e-57	postive		BCL2L11	AC079907.1	0.314212	2.68148e-12	postive		SCAF11	AL035448.1	0.655225	2.38786e-59	postive
ZEB1	AC131159.1	0.644142	8.59661e-57	postive		BID	MINCR	0.325119	4.16613e-13	postive		SCAF11	AL451042.2	0.333783	8.98928e-14	postive
HELLS	AC018695.4	0.644017	9.17393e-57	postive		RIPK1	MINCR	-0.32078	8.81764e-13	negative		SCAF11	HNF1A-AS1	0.490737	4.92432e-30	postive
ZEB1	AC009095.1	0.643651	1.10937e-56	postive		BAD	AF230666.2	-0.356875	1.18395e-15	negative		IL1B	LINC00624	0.463424	1.47494e-26	postive
HELLS	AC008434.1	0.64363	1.12136e-56	postive		BCL2A1	AF230666.2	0.397213	2.50815e-19	postive		SCAF11	LINC00624	0.719474	1.38268e-76	postive
HELLS	AP002812.3	0.64331	1.3244e-56	postive		BCL2L11	AF230666.2	0.499303	3.43573e-31	postive		SCAF11	AC009120.2	0.547225	2.6607e-38	postive
HELLS	AL021578.1	0.643251	1.36515e-56	postive		BCL2L12	AF230666.2	-0.322313	6.77568e-13	negative		IL1B	AC110792.3	0.352778	2.62011e-15	postive
ZEB1	AC093788.1	0.643133	1.45111e-56	postive		BCL2L11	CAPN10-DT	0.328135	2.45653e-13	postive		SCAF11	AC110792.3	0.646725	2.22853e-57	postive
ZEB1	AC048341.2	0.642815	1.71111e-56	postive		BCL2	LINC01443	0.302933	1.7003e-11	postive		IL1B	AL360219.2	0.552753	3.38176e-39	postive
LOX	LINC01615	0.642637	1.87629e-56	postive		CASP7	LINC01443	0.345399	1.06474e-14	postive		SCAF11	AL360219.2	0.607638	4.4724e-49	postive
HELLS	DLGAP4-AS1	0.642507	2.00627e-56	postive		BAD	AL109614.1	-0.374287	3.54945e-17	negative		IL1B	GSTCD-AS1	0.33189	1.26209e-13	postive
ZEB1	AP001160.4	0.642327	2.20207e-56	postive		BCL2L11	AL109614.1	0.465249	8.83211e-27	postive		SCAF11	GSTCD-AS1	0.714775	3.65308e-75	postive
EPAS1	AC093278.2	0.642272	2.2661e-56	postive		BCL2L12	AL109614.1	-0.356439	1.28911e-15	negative		IL1B	AC087501.4	0.3473	7.44669e-15	postive
HELLS	AL592148.3	0.642152	2.41021e-56	postive		BAD	AL136115.1	-0.396441	2.98236e-19	negative		SCAF11	AC087501.4	0.605475	1.19329e-48	postive
ZEB1	LINC00624	0.642071	2.51298e-56	postive		BCL2A1	AL136115.1	0.400048	1.32268e-19	postive		SCAF11	DNMBP-AS1	0.329791	1.83335e-13	postive
ZEB1	AC005726.2	0.641688	3.06308e-56	postive		BCL2L11	AL136115.1	0.550252	8.64076e-39	postive		SCAF11	AC092718.2	0.545892	4.35127e-38	postive
ZEB1	AC005104.1	0.641523	3.33397e-56	postive		BCL2L12	AL136115.1	-0.368427	1.1833e-16	negative		IL1B	AC010327.5	0.39865	1.81476e-19	postive
ZEB1	AC096564.1	0.641239	3.85839e-56	postive		BCL2L11	AC024560.3	0.300671	2.43908e-11	postive		SCAF11	AC010327.5	0.408461	1.9101e-20	postive
ZEB1	AC005261.1	0.641055	4.24153e-56	postive		BAD	AC010320.4	-0.370505	7.74276e-17	negative		IL1B	NEAT1	0.578014	1.63801e-43	postive
ZEB1	AC010132.4	0.640982	4.40425e-56	postive		BCL2L11	AC010320.4	0.47879	1.78419e-28	postive		SCAF11	NEAT1	0.625552	9.81445e-53	postive
HELLS	SLFNL1-AS1	0.640945	4.48949e-56	postive		BCL2L12	AC010320.4	-0.341622	2.15177e-14	negative		SCAF11	AC010300.1	0.579652	8.34397e-44	postive
ZEB1	AC015911.3	0.64081	4.81041e-56	postive		BCL2L2	AC010320.4	0.314659	2.48812e-12	postive		SCAF11	AL445223.1	0.610794	1.05435e-49	postive
ZEB1	AP002490.1	0.640743	4.98002e-56	postive		BCL2	FAM30A	0.342762	1.74176e-14	postive		SCAF11	AC012640.1	0.418798	1.6419e-21	postive
ZEB1	AL031775.2	0.640571	5.43893e-56	postive		BCL2L11	FAM30A	0.320591	9.10817e-13	postive		IL1B	AC026356.1	0.424836	3.76285e-22	postive
HELLS	AC138207.4	0.640345	6.10857e-56	postive		BMF	FAM30A	0.327534	2.73028e-13	postive		SCAF11	AC026356.1	0.695066	1.68289e-69	postive
ZEB1	NCOA7-AS1	0.640334	6.14129e-56	postive		BCL2A1	LINC00355	0.458793	5.34364e-26	postive		IL1B	NCOA7-AS1	0.613815	2.60351e-50	postive
ZEB1	AC026401.2	0.640203	6.5684e-56	postive		BAD	AC004584.1	-0.307294	8.4024e-12	negative		SCAF11	NCOA7-AS1	0.583245	1.87509e-44	postive
HELLS	Z82243.1	0.640041	7.13924e-56	postive		BCL2L11	AC004584.1	0.460382	3.44329e-26	postive		IL1B	MEIS1-AS2	0.670028	6.17614e-63	postive
ZEB1	ZNF571-AS1	0.640026	7.19399e-56	postive		BCL2L11	AC242426.2	0.358485	8.63684e-16	postive		SCAF11	MEIS1-AS2	0.522767	1.56911e-34	postive
HELLS	AL138963.1	0.640003	7.2793e-56	postive		BCL2L12	AC242426.2	-0.355223	1.63333e-15	negative		SCAF11	AC091057.1	0.530542	1.07214e-35	postive
HELLS	AC018410.1	0.639821	7.98727e-56	postive		BCL2L11	AC084357.2	0.306819	9.07847e-12	postive		IL1B	AC093732.1	0.327449	2.77125e-13	postive
HELLS	AC107993.1	0.63975	8.28574e-56	postive		BAD	AC009269.5	-0.36434	2.70181e-16	negative		SCAF11	AC093732.1	0.423503	5.22153e-22	postive
ZEB1	LINC00861	0.639746	8.29967e-56	postive		BCL2A1	AC009269.5	0.361932	4.36952e-16	postive		PLCG1	NKILA	0.365564	2.11252e-16	postive
HELLS	Z93930.3	0.639682	8.57553e-56	postive		BCL2L11	AC009269.5	0.493893	1.86244e-30	postive		SCAF11	AL078587.1	0.523826	1.0934e-34	postive
HELLS	AC004918.5	0.639606	8.91858e-56	postive		BCL2L12	AC009269.5	-0.329869	1.80809e-13	negative		SCAF11	AC127502.2	0.429443	1.19834e-22	postive
ZEB1	AC024075.3	0.639413	9.83992e-56	postive		BAD	AC010168.1	-0.389243	1.46644e-18	negative		SCAF11	AC004241.4	0.56098	1.46022e-40	postive
ZEB1	ZNF346-IT1	0.639192	1.10185e-55	postive		BCL2L11	AC010168.1	0.426822	2.30266e-22	postive		PLCG1	AL031709.1	0.363778	3.02377e-16	postive
ZEB1	AC130650.2	0.639156	1.12222e-55	postive		BCL2L12	AC010168.1	-0.349342	5.05724e-15	negative		SCAF11	AC005828.4	0.309977	5.41527e-12	postive
HELLS	AP002812.5	0.639155	1.12294e-55	postive		BCL2L11	AC013731.1	0.364814	2.45646e-16	postive		IL1B	AC087854.1	0.34433	1.30065e-14	postive
ZEB1	AL158071.1	0.639083	1.1649e-55	postive		BAD	AC100821.2	-0.352402	2.81713e-15	negative		SCAF11	AC087854.1	0.681846	5.94532e-66	postive
HELLS	AL121782.1	0.638997	1.21729e-55	postive		BCL2L11	AC100821.2	0.480985	9.32552e-29	postive		IL1B	SYNJ2-IT1	0.404809	4.45436e-20	postive
ZEB1	LNCSRLR	0.63897	1.23411e-55	postive		BCL2L12	AC100821.2	-0.324846	4.36918e-13	negative		SCAF11	SYNJ2-IT1	0.580113	6.89665e-44	postive
HELLS	AC025165.5	0.638885	1.28889e-55	postive		BAD	SMYD3-IT1	-0.393911	5.24322e-19	negative		IL1B	AL049780.1	0.371913	5.79781e-17	postive
ZEB1	AC078962.2	0.638654	1.45009e-55	postive		BCL2A1	SMYD3-IT1	0.301122	2.27039e-11	postive		SCAF11	AL049780.1	0.596772	5.73706e-47	postive
ZEB1	ACSL3-AS1	0.638649	1.45374e-55	postive		BCL2L11	SMYD3-IT1	0.504122	7.42909e-32	postive		PLCG1	TMCC1-AS1	0.356041	1.39311e-15	postive
ZEB1	GTF3C2-AS1	0.638641	1.45952e-55	postive		BCL2L12	SMYD3-IT1	-0.362512	3.89332e-16	negative		IL1B	AC131971.1	0.403555	5.94419e-20	postive
HELLS	ITPK1-AS1	0.638597	1.4926e-55	postive		BCL2L11	AL031705.1	0.30677	9.15073e-12	postive		SCAF11	AC131971.1	0.753062	1.13832e-87	postive
HELLS	AC006160.1	0.638532	1.54288e-55	postive		BAD	RAP2C-AS1	-0.396474	2.96028e-19	negative		PYCARD	AC026471.3	0.465639	7.91286e-27	postive
HELLS	AC020612.3	0.638447	1.6111e-55	postive		BAK1	RAP2C-AS1	-0.319616	1.07597e-12	negative		SCAF11	AC005332.6	0.458874	5.22543e-26	postive
HELLS	AC026401.2	0.63844	1.61688e-55	postive		BCL2L11	RAP2C-AS1	0.449127	7.37014e-25	postive		SCAF11	AC009148.1	0.504068	7.55988e-32	postive
CRYAB	LINC00924	0.638427	1.62758e-55	postive		BCL2L12	RAP2C-AS1	-0.413001	6.56946e-21	negative		IL1B	AC107308.1	0.539842	3.94402e-37	postive
ZEB1	AC011405.1	0.638334	1.70617e-55	postive		BCL2A1	AC010768.2	0.304603	1.29986e-11	postive		SCAF11	AC107308.1	0.467839	4.24423e-27	postive
ZEB1	AC008026.3	0.638257	1.77454e-55	postive		BCL2L11	AC010768.2	0.433922	3.87293e-23	postive		PLCG1	DPP9-AS1	0.312211	3.74288e-12	postive
HELLS	CASC2	0.637762	2.28247e-55	postive		BCL2A1	AC012358.4	0.441963	4.88598e-24	postive		SCAF11	LINC01572	0.679738	2.10213e-65	postive
ZEB1	AC025031.3	0.63771	2.34322e-55	postive		BCL2L11	AC012358.4	0.445052	2.17338e-24	postive		IL1B	AC006064.2	0.419634	1.34131e-21	postive
ZEB1	Z83843.1	0.637626	2.44522e-55	postive		BCL2L12	AC012358.4	-0.34496	1.15623e-14	negative		SCAF11	AC006064.2	0.757892	2.06479e-89	postive
HELLS	AP002449.1	0.637534	2.56253e-55	postive		BAD	AL356124.1	-0.368245	1.22799e-16	negative		IL1B	AL020997.2	0.429752	1.10903e-22	postive
HELLS	AL365436.2	0.637196	3.0415e-55	postive		BCL2L11	AL356124.1	0.420955	9.73328e-22	postive		SCAF11	AL020997.2	0.706122	1.27955e-72	postive
ZEB1	AP002336.2	0.637058	3.26244e-55	postive		BCL2L12	AL356124.1	-0.356952	1.16619e-15	negative		SCAF11	AL121603.2	0.344114	1.35423e-14	postive
HELLS	AC040169.3	0.636872	3.58418e-55	postive		BAD	AL365356.1	-0.375965	2.50278e-17	negative		IL1B	SIDT1-AS1	0.533721	3.50787e-36	postive
CRYAB	AP003071.4	0.636849	3.62524e-55	postive		BCL2L11	AL365356.1	0.484857	2.93314e-29	postive		SCAF11	SIDT1-AS1	0.455614	1.27828e-25	postive
ZEB1	AL133342.1	0.636834	3.65372e-55	postive		BCL2L12	AL365356.1	-0.342133	1.95738e-14	negative		IL1B	AC109597.2	0.448073	9.76101e-25	postive
HELLS	AC092171.1	0.636817	3.68473e-55	postive		BAD	AC018809.1	-0.375269	2.89365e-17	negative		SCAF11	AC109597.2	0.670716	4.1596e-63	postive
ZEB1	AP000873.2	0.636709	3.89164e-55	postive		BCL2L11	AC018809.1	0.43242	5.66633e-23	postive		IL1B	AC084824.6	0.312843	3.36974e-12	postive
PTGS2	AP000763.3	0.636679	3.95158e-55	postive		BCL2L12	AC018809.1	-0.313666	2.93774e-12	negative		SCAF11	AC084824.6	0.672388	1.58328e-63	postive
ZEB1	AC068491.3	0.636577	4.16106e-55	postive		CSE1L	KLHL7-DT	0.331249	1.41481e-13	postive		PYCARD	URB1-AS1	0.321026	8.45347e-13	postive
ZEB1	AC114760.2	0.63648	4.36984e-55	postive		BCL2L11	AC083906.3	0.356607	1.24757e-15	postive		SCAF11	URB1-AS1	-0.305124	1.19494e-11	negative
HELLS	AC109347.2	0.6363	4.78558e-55	postive		BCL2L11	HCG27	0.406732	2.85596e-20	postive		SCAF11	AC080188.1	0.469296	2.80269e-27	postive
ZEB1	AL157392.4	0.636298	4.7909e-55	postive		BAD	ITPRIP-AS1	-0.308604	6.78424e-12	negative		SCAF11	CRYZL2P-SEC16B	0.502921	1.09057e-31	postive
ZEB1	AL731563.4	0.636141	5.18621e-55	postive		BCL2A1	ITPRIP-AS1	0.506518	3.43868e-32	postive		IL1B	AC019205.1	0.344948	1.15866e-14	postive
ZEB1	AC005096.1	0.635962	5.67755e-55	postive		BCL2L11	ITPRIP-AS1	0.446596	1.44532e-24	postive		SCAF11	AC019205.1	0.437331	1.62115e-23	postive
ZEB1	AL645568.1	0.63587	5.94634e-55	postive		BAD	AC244093.5	-0.383965	4.6004e-18	negative		PLCG1	AL137002.1	0.300173	2.63986e-11	postive
PTGS2	LINC02649	0.635794	6.17786e-55	postive		BCL2L11	AC244093.5	0.513676	3.31737e-33	postive		IL1B	AC012213.3	0.30602	1.03365e-11	postive
HELLS	ZBED3-AS1	0.635662	6.60392e-55	postive		BCL2L12	AC244093.5	-0.344643	1.22674e-14	negative		SCAF11	AC012213.3	0.675697	2.29739e-64	postive
ZEB1	AC015987.1	0.635659	6.61198e-55	postive		BCL2A1	AC023157.2	0.357622	1.02297e-15	postive		SCAF11	AC084824.5	0.749823	1.59234e-86	postive
ZEB1	AC007216.3	0.635589	6.84977e-55	postive		BCL2L11	AC023157.2	0.419854	1.2716e-21	postive		GSDMD	AC011477.2	-0.326653	3.1867e-13	negative
HELLS	MKNK1-AS1	0.635506	7.14335e-55	postive		BAD	CERNA1	-0.331573	1.33556e-13	negative		SCAF11	AC011477.2	0.589426	1.37689e-45	postive
ZEB1	AL136115.2	0.635243	8.15252e-55	postive		BCL2	CERNA1	0.375104	2.99465e-17	postive		GSDMD	AC019080.1	-0.351948	3.07365e-15	negative
ZEB1	AL122035.2	0.635066	8.91405e-55	postive		BCL2A1	CERNA1	0.378635	1.4292e-17	postive		IL1B	AC019080.1	0.341112	2.36448e-14	postive
ZEB1	CARNMT1-AS1	0.634797	1.02031e-54	postive		BCL2L11	CERNA1	0.601446	7.27473e-48	postive		SCAF11	AC019080.1	0.707762	4.28657e-73	postive
HELLS	AC010168.1	0.634788	1.02518e-54	postive		BCL2L12	CERNA1	-0.367463	1.4393e-16	negative		SCAF11	ZKSCAN2-DT	0.447596	1.10816e-24	postive
HELLS	AC009054.2	0.634625	1.11238e-54	postive		BCL2L2	CERNA1	0.303726	1.4969e-11	postive		PLCG1	AL118506.1	0.556967	6.83659e-40	postive
ZEB1	AC010245.2	0.63462	1.11503e-54	postive		BCL2L11	AC037487.1	0.34695	7.95525e-15	postive		IL1B	SCAT2	0.416175	3.08485e-21	postive
ZEB1	RNF144A-AS1	0.634551	1.15463e-54	postive		BAD	AL031651.2	-0.321628	7.62293e-13	negative		SCAF11	SCAT2	0.730214	6.0031e-80	postive
ZEB1	AC022558.3	0.634411	1.23892e-54	postive		BCL2A1	AL031651.2	0.470345	2.07585e-27	postive		SCAF11	Z83843.1	0.613944	2.45198e-50	postive
ZEB1	AL080317.2	0.634383	1.25642e-54	postive		BCL2L11	AL031651.2	0.442097	4.71824e-24	postive		PLCG1	AL390719.2	0.308539	6.85664e-12	postive
ZEB1	AC008121.3	0.634257	1.3379e-54	postive		BCL2L12	AL031651.2	-0.309996	5.39801e-12	negative		IL1B	AC004832.4	0.446994	1.30049e-24	postive
ZEB1	AC124283.3	0.63414	1.41923e-54	postive		BAD	AC073641.1	-0.328588	2.26782e-13	negative		SCAF11	AC004832.4	0.710436	7.08275e-74	postive
ZEB1	AC007938.3	0.633967	1.54734e-54	postive		BCL2L11	AC073641.1	0.377762	1.71757e-17	postive		SCAF11	AL049796.1	0.369917	8.73363e-17	postive
ZEB1	PPP3CB-AS1	0.633924	1.58118e-54	postive		BCL2L12	AC073641.1	-0.308363	7.0571e-12	negative		SCAF11	AC064836.1	0.534885	2.32271e-36	postive
ZEB1	AC096708.2	0.633794	1.68716e-54	postive		BCL2L11	MALINC1	0.341225	2.31563e-14	postive		SCAF11	AL031667.3	0.670473	4.78409e-63	postive
ZEB1	AC010422.4	0.633745	1.72914e-54	postive		BCL2L12	MALINC1	-0.301934	1.99466e-11	negative		IL1B	AL080317.2	0.365733	2.04167e-16	postive
HELLS	AL445223.1	0.633679	1.78715e-54	postive		BAD	AC090197.1	-0.345341	1.07649e-14	negative		SCAF11	AL080317.2	0.714857	3.45239e-75	postive
HELLS	AC103740.1	0.633507	1.94786e-54	postive		BCL2A1	AC090197.1	0.387967	1.93717e-18	postive		PLCG1	ZNF213-AS1	0.416485	2.86445e-21	postive
ZEB1	AC078778.1	0.633502	1.9528e-54	postive		BCL2L11	AC090197.1	0.525239	6.73555e-35	postive		SCAF11	MED4-AS1	0.474592	6.09459e-28	postive
HELLS	AC000061.1	0.633481	1.97302e-54	postive		BCL2L12	AC090197.1	-0.333865	8.858e-14	negative		SCAF11	AC068620.2	0.602804	3.96709e-48	postive
HELLS	UBOX5-AS1	0.633478	1.97611e-54	postive		BCL2L11	SNHG22	0.355899	1.43207e-15	postive		IL1B	LINC01094	0.590479	8.77517e-46	postive
HELLS	NEAT1	0.633305	2.15462e-54	postive		BAD	AL512656.2	-0.350078	4.39567e-15	negative		SCAF11	LINC01094	0.459034	4.99897e-26	postive
ZEB1	LINC02156	0.633139	2.34062e-54	postive		BCL2L11	AL512656.2	0.498191	4.87392e-31	postive		TNF	LINC01094	0.405999	3.38431e-20	postive
ZEB1	AP006259.1	0.633071	2.42177e-54	postive		BCL2L12	AL512656.2	-0.313048	3.25682e-12	negative		PLCG1	AC008764.8	0.345335	1.07771e-14	postive
ZEB1	AL138759.1	0.633039	2.46032e-54	postive		BAD	AL442125.1	-0.346453	8.73548e-15	negative		SCAF11	AC008764.8	0.415499	3.62596e-21	postive
ZEB1	AL139011.1	0.632967	2.55142e-54	postive		BCL2A1	AL442125.1	0.353898	2.11112e-15	postive		SCAF11	AL022322.1	0.526291	4.68989e-35	postive
HELLS	AC078852.1	0.63289	2.65066e-54	postive		BCL2L11	AL442125.1	0.499858	2.8833e-31	postive		SCAF11	SNHG4	0.509717	1.21747e-32	postive
ZEB1	AC004908.2	0.632837	2.72212e-54	postive		BCL2L12	AL442125.1	-0.329778	1.83742e-13	negative		NOD2	AL133520.1	0.323814	5.22628e-13	postive
HELLS	AC010761.1	0.632815	2.75144e-54	postive		BID	FRGCA	0.34325	1.59068e-14	postive		PLCG1	AL133520.1	0.56166	1.12163e-40	postive
ZEB1	AL133260.2	0.632746	2.84841e-54	postive		BAD	AL158163.1	-0.376036	2.46588e-17	negative		IL1B	AC092168.2	0.413102	6.41384e-21	postive
HELLS	AC034229.4	0.632659	2.97427e-54	postive		BCL2L11	AL158163.1	0.506493	3.46579e-32	postive		SCAF11	AC092168.2	0.660453	1.36295e-60	postive
HELLS	LINC02595	0.632511	3.20277e-54	postive		BCL2L12	AL158163.1	-0.373077	4.56009e-17	negative		IL1B	LINC01655	0.466766	5.75475e-27	postive
PTGS2	AP001160.4	0.632483	3.2477e-54	postive		BCL2L11	AC074124.1	0.324369	4.7464e-13	postive		SCAF11	LINC01655	0.534326	2.83183e-36	postive
ZEB1	AL031670.1	0.632331	3.50235e-54	postive		BCL2L12	AC074124.1	-0.301312	2.20268e-11	negative		SCAF11	AC024361.1	0.46882	3.20966e-27	postive
ZEB1	CFAP44-AS1	0.632252	3.64324e-54	postive		BAD	AC091153.2	-0.330324	1.66789e-13	negative		GSDMD	AL133243.2	-0.312742	3.4268e-12	negative
ZEB1	AL512506.1	0.631558	5.14323e-54	postive		BCL2L11	AC091153.2	0.398803	1.7532e-19	postive		IL1B	AL133243.2	0.411433	9.51515e-21	postive
ZEB1	AC244093.4	0.631514	5.25568e-54	postive		BMF	AC090114.2	0.309552	5.80732e-12	postive		SCAF11	AL133243.2	0.737544	2.4504e-82	postive
LOX	AC018755.4	0.631497	5.30108e-54	postive		BAD	AC010834.3	-0.3744	3.46695e-17	negative		SCAF11	AL157400.4	0.586748	4.29845e-45	postive
HELLS	NARF-IT1	0.63143	5.47981e-54	postive		BCL2L11	AC010834.3	0.464203	1.18532e-26	postive		SCAF11	UBE2D3-AS1	0.355413	1.57415e-15	postive
HELLS	AC110792.3	0.631428	5.48533e-54	postive		BCL2L12	AC010834.3	-0.35286	2.57949e-15	negative		SCAF11	LINC00582	0.472936	9.8493e-28	postive
HELLS	HMGA2-AS1	0.631426	5.49117e-54	postive		BCL2L11	AL450344.3	0.395004	4.1119e-19	postive		CASP6	AC004130.2	0.350684	3.91563e-15	postive
HELLS	AC008870.2	0.631294	5.86199e-54	postive		BCL2A1	AC005224.3	0.484092	3.69057e-29	postive		SCAF11	AC009495.1	0.382486	6.3147e-18	postive
ZEB1	AC068790.2	0.631279	5.90794e-54	postive		BCL2L11	AC005224.3	0.471315	1.57152e-27	postive		PLCG1	AC027601.2	0.360574	5.72088e-16	postive
ZEB1	AP003486.1	0.631056	6.59874e-54	postive		FAS	AC005224.3	0.319317	1.13241e-12	postive		PLCG1	LINC02604	0.405131	4.13589e-20	postive
HELLS	AC090948.2	0.63088	7.19687e-54	postive		BCL2L11	AC100791.2	0.301936	1.99425e-11	postive		PLCG1	UCKL1-AS1	0.553852	2.23356e-39	postive
ZEB1	AC109992.2	0.630553	8.46206e-54	postive		BCL2A1	GK-IT1	0.550843	6.92724e-39	postive		SCAF11	UCKL1-AS1	0.33435	8.11839e-14	postive
ZEB1	Z98885.3	0.630439	8.95486e-54	postive		BCL2L11	GK-IT1	0.421765	7.99034e-22	postive		IL1B	AC024075.3	0.352204	2.92637e-15	postive
ZEB1	AC020663.3	0.630424	9.01897e-54	postive		BCL2L11	GEMIN7-AS1	0.435986	2.28851e-23	postive		SCAF11	AC024075.3	0.648259	9.93572e-58	postive
ZEB1	C2orf27A	0.630404	9.10916e-54	postive		BAD	AL031005.1	-0.355264	1.62013e-15	negative		IL1B	LINC01762	0.31069	4.81473e-12	postive
HELLS	NDUFV2-AS1	0.630388	9.1824e-54	postive		BCL2L11	AL031005.1	0.496824	7.48197e-31	postive		SCAF11	LINC01762	0.512131	5.52003e-33	postive
ZEB1	AL133330.1	0.630234	9.91029e-54	postive		BCL2L12	AL031005.1	-0.349062	5.33378e-15	negative		IL1B	AC138956.1	0.308077	7.3944e-12	postive
ZEB1	AC090739.1	0.630162	1.02687e-53	postive		BID	DANCR	0.418654	1.69991e-21	postive		SCAF11	AC138956.1	0.67308	1.05982e-63	postive
ZEB1	AC092338.1	0.630099	1.0592e-53	postive		RIPK1	DANCR	-0.303642	1.51741e-11	negative		IL1B	CSNK1G2-AS1	0.392619	6.98148e-19	postive
HELLS	AC091906.1	0.630091	1.06334e-53	postive		BCL2L11	AC104365.2	0.340707	2.54779e-14	postive		SCAF11	CSNK1G2-AS1	0.605654	1.10031e-48	postive
ZEB1	AL355075.2	0.629371	1.51625e-53	postive		BCL2L12	AC104365.2	-0.325556	3.86061e-13	negative		IL1B	AC015911.3	0.315499	2.16122e-12	postive
ZEB1	ARNTL2-AS1	0.629371	1.5166e-53	postive		BCL2A1	LINC01116	0.344806	1.18994e-14	postive		SCAF11	AC015911.3	0.71387	6.81082e-75	postive
ZEB1	AC009318.2	0.629351	1.53184e-53	postive		BAD	ATP1B3-AS1	-0.378289	1.53724e-17	negative		GSDMD	AL391834.1	-0.308579	6.81156e-12	negative
ZEB1	GSTCD-AS1	0.629152	1.68938e-53	postive		BCL2A1	ATP1B3-AS1	0.324773	4.42458e-13	postive		IL1B	AL391834.1	0.342331	1.88705e-14	postive
ZEB1	AC005072.1	0.629102	1.73123e-53	postive		BCL2L11	ATP1B3-AS1	0.514809	2.27908e-33	postive		SCAF11	AL391834.1	0.712606	1.61898e-74	postive
HELLS	MIS18A-AS1	0.628907	1.90555e-53	postive		BCL2L12	ATP1B3-AS1	-0.342366	1.8748e-14	negative		IL1B	AL355001.1	0.395674	3.54069e-19	postive
ZEB1	AC105339.2	0.628903	1.90889e-53	postive		BCL2L11	LINC02042	0.372811	4.81754e-17	postive		SCAF11	AL355001.1	0.574288	7.488e-43	postive
HELLS	AC020661.3	0.628437	2.39987e-53	postive		BCL2L11	AC018413.1	0.398835	1.74081e-19	postive		CASP6	AC025181.2	0.329667	1.87407e-13	postive
ZEB1	AC110769.2	0.628274	2.59976e-53	postive		CASP10	AC018413.1	0.394579	4.51924e-19	postive		NOD2	AC025181.2	0.307079	8.70296e-12	postive
ZEB1	AL596325.2	0.628191	2.7079e-53	postive		FAS	AC018413.1	0.302141	1.9299e-11	postive		SCAF11	MIR3936HG	0.343081	1.64155e-14	postive
HELLS	ADAMTS9-AS1	0.628184	2.71731e-53	postive		BAD	AL138963.1	-0.354246	1.97385e-15	negative		IL1B	AC004076.2	0.337637	4.47389e-14	postive
HELLS	SREBF2-AS1	0.628099	2.83331e-53	postive		BCL2L11	AL138963.1	0.449026	7.57186e-25	postive		SCAF11	AC004076.2	0.636935	3.47102e-55	postive
ZEB1	AL442125.1	0.628083	2.8555e-53	postive		BCL2L12	AL138963.1	-0.324757	4.43692e-13	negative		SCAF11	AC139720.2	0.377936	1.65584e-17	postive
HELLS	ARAP1-AS2	0.628001	2.97283e-53	postive		BAD	PEF1-AS1	-0.32009	9.92436e-13	negative		SCAF11	AP000350.6	0.5629	6.92528e-41	postive
HELLS	AC138393.3	0.627957	3.03754e-53	postive		BCL2A1	PEF1-AS1	0.342222	1.92561e-14	postive		SCAF11	AC078852.2	0.305788	1.07329e-11	postive
ZEB1	ITFG1-AS1	0.627928	3.08036e-53	postive		BCL2L11	PEF1-AS1	0.495196	1.24296e-30	postive		PLCG1	AC020558.2	0.301184	2.24828e-11	postive
HELLS	AL035448.1	0.627924	3.08625e-53	postive		BCL2L12	PEF1-AS1	-0.310219	5.20309e-12	negative		IL1B	LINC01270	0.343206	1.60395e-14	postive
ZEB1	AC105036.3	0.627868	3.17322e-53	postive		BCL2L2	PEF1-AS1	0.314775	2.44016e-12	postive		SCAF11	AL049555.1	0.354123	2.02144e-15	postive
ZEB1	AC004832.5	0.62777	3.32796e-53	postive		BAD	AC005034.4	-0.400336	1.23925e-19	negative		IL1B	AC009754.1	0.475982	4.06634e-28	postive
HELLS	AC093297.2	0.627588	3.6391e-53	postive		BAK1	AC005034.4	-0.302539	1.811e-11	negative		SCAF11	AC009754.1	0.698916	1.43286e-70	postive
LOX	AC060766.7	0.62725	4.29209e-53	postive		BCL2L11	AC005034.4	0.444685	2.3937e-24	postive		PLCG1	LINC00106	0.371011	6.97879e-17	postive
ZEB1	AL136988.2	0.627235	4.32405e-53	postive		BCL2L12	AC005034.4	-0.333299	9.80577e-14	negative		SCAF11	AC097641.2	0.536447	1.33268e-36	postive
LOX	AC245128.3	0.627224	4.34763e-53	postive		BID	AC005034.4	-0.310902	4.64867e-12	negative		SCAF11	LINC01473	0.645018	5.44749e-57	postive
ZEB1	AC009299.2	0.627202	4.39381e-53	postive		TNFRSF1A	AC005034.4	-0.31112	4.4844e-12	negative		SCAF11	AC015849.3	0.672558	1.4346e-63	postive
HELLS	AC019118.1	0.62714	4.52893e-53	postive		FAS	AL590617.2	-0.322861	6.16355e-13	negative		IL1B	AC008033.3	0.514957	2.16986e-33	postive
ZEB1	AC020661.3	0.626995	4.8621e-53	postive		BCL2A1	AL137779.2	0.365375	2.19434e-16	postive		SCAF11	AC008033.3	0.606086	9.05272e-49	postive
HELLS	AL133342.1	0.626883	5.13459e-53	postive		BCL2L11	AL137779.2	0.511614	6.54399e-33	postive		IL1B	AC009120.3	0.404726	4.54088e-20	postive
HELLS	AL096701.3	0.62688	5.14357e-53	postive		BCL2L2	AL137779.2	0.328298	2.38676e-13	postive		SCAF11	AC009120.3	0.530912	9.41925e-36	postive
HELLS	AC048341.2	0.626844	5.23322e-53	postive		BCL2L2	AC005180.2	0.345093	1.12771e-14	postive		GSDMD	AL353796.1	-0.315263	2.24865e-12	negative
CRYAB	AC005180.1	0.626737	5.5147e-53	postive		BAD	AC079336.1	-0.336949	5.07126e-14	negative		SCAF11	AL353796.1	0.527621	2.96219e-35	postive
ZEB1	AL080317.1	0.626516	6.14187e-53	postive		BCL2L11	AC079336.1	0.485577	2.36166e-29	postive		IL1B	LINC01235	0.301621	2.09702e-11	postive
ZEB1	AC008937.3	0.626415	6.45019e-53	postive		BCL2L12	AC079336.1	-0.313531	3.00449e-12	negative		IL1B	AC020915.2	0.35728	1.09382e-15	postive
ZEB1	AC069542.1	0.626372	6.5891e-53	postive		BCL2A1	HIF1A-AS3	0.475441	4.7609e-28	postive		SCAF11	AC020915.2	0.53922	4.93481e-37	postive
ZEB1	AC015914.1	0.626283	6.87954e-53	postive		BCL2L11	HIF1A-AS3	0.390227	1.18233e-18	postive		IL1B	GSN-AS1	0.436698	1.90677e-23	postive
HELLS	AL136988.2	0.626206	7.14156e-53	postive		BAD	NDUFV2-AS1	-0.356399	1.29924e-15	negative		SCAF11	GSN-AS1	0.537619	8.76765e-37	postive
HELLS	AC002128.2	0.626179	7.23762e-53	postive		BCL2A1	NDUFV2-AS1	0.343272	1.58435e-14	postive		PLCG1	TMEM51-AS1	0.367478	1.43483e-16	postive
HELLS	CFTR-AS1	0.626049	7.71089e-53	postive		BCL2L11	NDUFV2-AS1	0.541091	2.51135e-37	postive		IL1B	AP000866.6	0.370233	8.18567e-17	postive
ZEB1	AC092755.1	0.626004	7.87951e-53	postive		BCL2L12	NDUFV2-AS1	-0.317937	1.43179e-12	negative		SCAF11	AP000866.6	0.690409	3.14665e-68	postive
ZEB1	AC004223.2	0.625858	8.45807e-53	postive		BAD	AC131159.1	-0.313412	3.06483e-12	negative		SCAF11	AC124045.1	0.530244	1.1897e-35	postive
HELLS	AC087286.2	0.625704	9.11814e-53	postive		BCL2L11	AC131159.1	0.466383	6.41347e-27	postive		IL1B	AL360093.1	0.326993	3.0024e-13	postive
HELLS	AC004076.2	0.625702	9.12732e-53	postive		BAD	AL358216.1	-0.360539	5.76024e-16	negative		SCAF11	AL360093.1	0.640365	6.04504e-56	postive
PTGS2	AL139807.1	0.625621	9.49019e-53	postive		BCL2A1	AL358216.1	0.32492	4.31332e-13	postive		SCAF11	FARSA-AS1	0.542308	1.6149e-37	postive
HELLS	AL157932.1	0.625532	9.90935e-53	postive		BCL2L11	AL358216.1	0.493547	2.07292e-30	postive		SCAF11	AC137770.1	0.475313	4.941e-28	postive
ZEB1	MIR29B2CHG	0.625527	9.9356e-53	postive		BCL2L12	AL358216.1	-0.341949	2.02534e-14	negative		SCAF11	RNF213-AS1	0.441284	5.83132e-24	postive
ZEB1	AC066613.1	0.625474	1.01957e-52	postive		BCL2L11	AC073073.2	0.407457	2.41337e-20	postive		GSDMD	AC115618.2	-0.312409	3.6219e-12	negative
HELLS	AP001160.4	0.625247	1.13838e-52	postive		TNFRSF1A	AC073073.2	-0.327331	2.82946e-13	negative		SCAF11	AC115618.2	0.400137	1.29624e-19	postive
HELLS	AL360091.1	0.625221	1.15259e-52	postive		BAD	AC026771.1	-0.352472	2.7794e-15	negative		SCAF11	GRM8-AS1	0.499697	3.03431e-31	postive
ZEB1	ITGA6-AS1	0.625185	1.17322e-52	postive		BCL2L11	AC026771.1	0.483964	3.835e-29	postive		SCAF11	AC103591.3	0.606622	7.09875e-49	postive
HELLS	AC040934.1	0.624987	1.2911e-52	postive		BCL2L12	AC026771.1	-0.304244	1.37721e-11	negative		GSDMD	AL360270.1	-0.38892	1.57369e-18	negative
ZEB1	HCG18	0.624927	1.32921e-52	postive		BCL2A1	CLMAT3	0.365298	2.22868e-16	postive		IL1B	AL360270.1	0.388199	1.84148e-18	postive
HELLS	AL591848.4	0.624753	1.44599e-52	postive		BCL2L11	CLMAT3	0.347772	6.8103e-15	postive		SCAF11	AL360270.1	0.595166	1.15706e-46	postive
LOX	GORAB-AS1	0.624691	1.48989e-52	postive		BCL2L11	AL592301.1	0.455432	1.34328e-25	postive		SCAF11	AC010761.1	0.459655	4.21098e-26	postive
ZEB1	AC092794.1	0.624577	1.57499e-52	postive		BAD	PIK3IP1-AS1	-0.304514	1.31868e-11	negative		PLCG1	AL035071.1	0.363736	3.04924e-16	postive
ZEB1	AC025165.5	0.62442	1.6986e-52	postive		BCL2	LINC01857	0.363257	3.35577e-16	postive		SCAF11	AL035071.1	0.387177	2.29975e-18	postive
HELLS	AC007497.1	0.624366	1.74359e-52	postive		BCL2L11	LINC01857	0.338073	4.13153e-14	postive		IL1B	AC002128.1	0.439231	9.93285e-24	postive
HELLS	AC022893.1	0.624352	1.75576e-52	postive		BMF	LINC01857	0.304569	1.30693e-11	postive		SCAF11	AC002128.1	0.645029	5.41548e-57	postive
HELLS	AOAH-IT1	0.624268	1.82819e-52	postive		BCL2L11	AC010525.1	0.317693	1.49232e-12	postive		SCAF11	LMO7-AS1	0.493937	1.83749e-30	postive
HELLS	AC108058.1	0.624024	2.05752e-52	postive		BCL2A1	AL391832.3	0.552777	3.35091e-39	postive		IL1B	AL122035.2	0.427196	2.09831e-22	postive
HELLS	AC079336.2	0.623939	2.14329e-52	postive		BCL2L11	AL391832.3	0.305418	1.13959e-11	postive		SCAF11	AL122035.2	0.679544	2.35953e-65	postive
ZEB1	AC009950.1	0.623891	2.19356e-52	postive		BAD	AC098484.1	-0.32455	4.59996e-13	negative		IL1B	AC004988.1	0.641944	2.68375e-56	postive
ZEB1	SH3BP5-AS1	0.623886	2.19951e-52	postive		BCL2	AC098484.1	0.307838	7.68987e-12	postive		SCAF11	AC004988.1	0.625382	1.06585e-52	postive
HELLS	AC137932.2	0.623882	2.20302e-52	postive		BCL2L11	AC098484.1	0.45912	4.88214e-26	postive		IL1B	KIF1C-AS1	0.312921	3.32592e-12	postive
ZEB1	ADAMTSL4-AS1	0.623827	2.26255e-52	postive		BCL2L12	AC098484.1	-0.418464	1.77956e-21	negative		SCAF11	KIF1C-AS1	0.323536	5.48462e-13	postive
ZEB1	AC114781.2	0.623827	2.26308e-52	postive		BCL2L2	AC098484.1	0.323651	5.37673e-13	postive		GSDMD	AC110769.2	-0.300733	2.41535e-11	negative
HELLS	AC005021.1	0.623447	2.71716e-52	postive		TNFRSF1A	AC098484.1	-0.310291	5.14191e-12	negative		IL1B	AC110769.2	0.344898	1.16961e-14	postive
HELLS	AC002128.1	0.623328	2.8781e-52	postive		BAD	EIPR1-IT1	-0.325543	3.8694e-13	negative		SCAF11	AC110769.2	0.675327	2.85589e-64	postive
ZEB1	AC007038.1	0.623244	2.9966e-52	postive		BCL2L11	EIPR1-IT1	0.451907	3.49438e-25	postive		PLCG1	AL031846.2	0.310618	4.87225e-12	postive
HELLS	AC078883.2	0.623192	3.07234e-52	postive		BCL2L12	EIPR1-IT1	-0.315346	2.21753e-12	negative		SCAF11	AL031846.2	0.383366	5.23075e-18	postive
HELLS	CSNK1G2-AS1	0.622903	3.53063e-52	postive		BAD	AC007114.2	-0.368889	1.07717e-16	negative		IL1B	LINC02428	0.368635	1.13427e-16	postive
ZEB1	AC092168.2	0.622802	3.70795e-52	postive		BCL2L11	AC007114.2	0.466968	5.43448e-27	postive		IL1B	AL136988.2	0.387244	2.2665e-18	postive
HELLS	AL442125.2	0.622718	3.85995e-52	postive		BCL2L12	AC007114.2	-0.356607	1.24743e-15	negative		SCAF11	AL136988.2	0.653035	7.79524e-59	postive
ZEB1	AC074032.1	0.622617	4.05256e-52	postive		BAD	SAP30L-AS1	-0.400824	1.10911e-19	negative		CASP6	AL391883.1	0.373398	4.26748e-17	postive
ZEB1	AL929236.1	0.622605	4.07587e-52	postive		BCL2L11	SAP30L-AS1	0.538867	5.60404e-37	postive		IL1B	AL807757.2	0.542086	1.75051e-37	postive
HELLS	AL353796.1	0.622572	4.14126e-52	postive		BCL2L12	SAP30L-AS1	-0.377308	1.88937e-17	negative		SCAF11	AL807757.2	0.680745	1.15144e-65	postive
ZEB1	AC013403.2	0.622461	4.36729e-52	postive		BCL2L2	SAP30L-AS1	0.308035	7.4455e-12	postive		SCAF11	SEC24B-AS1	0.476959	3.0551e-28	postive
ZEB1	AL591848.4	0.622459	4.37112e-52	postive		BAD	WARS2-AS1	-0.334222	8.307e-14	negative		GSDMD	LINC00662	-0.361959	4.34657e-16	negative
HELLS	MCCC1-AS1	0.622394	4.51077e-52	postive		BCL2L11	WARS2-AS1	0.336954	5.06632e-14	postive		SCAF11	LINC00662	0.475348	4.89137e-28	postive
ZEB1	AL162424.1	0.622245	4.84482e-52	postive		BCL2L12	WARS2-AS1	-0.308987	6.37133e-12	negative		SCAF11	AC129510.1	0.435049	2.90683e-23	postive
ZEB1	JARID2-AS1	0.622147	5.07682e-52	postive		TNFRSF1A	WARS2-AS1	-0.358771	8.16372e-16	negative		IL1B	AC022558.3	0.486609	1.73003e-29	postive
HELLS	AL109761.1	0.622138	5.09986e-52	postive		CSE1L	Z95115.1	0.352429	2.80237e-15	postive		SCAF11	AC022558.3	0.668582	1.4135e-62	postive
HELLS	AC020763.1	0.622037	5.35289e-52	postive		FAS	SNHG17	-0.382362	6.48332e-18	negative		SCAF11	AC090772.3	0.376851	2.07944e-17	postive
ZEB1	AC006033.2	0.622032	5.36633e-52	postive		TNFSF10	SNHG17	-0.313369	3.08699e-12	negative		SCAF11	AC243967.2	0.520268	3.66427e-34	postive
HELLS	ARRDC3-AS1	0.621745	6.15685e-52	postive		BAD	AC004691.1	-0.315577	2.13285e-12	negative		PLCG1	AL359881.1	0.404781	4.4831e-20	postive
PTGS2	MAGI2-AS3	0.621742	6.16566e-52	postive		BAD	SMC5-AS1	-0.305052	1.20891e-11	negative		SCAF11	AC068790.3	0.677909	6.23496e-65	postive
PTGS2	AL078581.2	0.621647	6.45346e-52	postive		BCL2L11	SMC5-AS1	0.445355	2.00648e-24	postive		GSDMD	AL139246.5	0.362879	3.61841e-16	postive
HELLS	AC027373.1	0.62158	6.66162e-52	postive		BCL2L12	SMC5-AS1	-0.385863	3.0565e-18	negative		PYCARD	AL139246.5	0.361604	4.66387e-16	postive
ZEB1	AC009812.3	0.621502	6.91507e-52	postive		BCL2L2	SMC5-AS1	0.320068	9.96021e-13	postive		SCAF11	AL139246.5	-0.349449	4.95543e-15	negative
ZEB1	ADNP-AS1	0.621264	7.74997e-52	postive		BAD	KIF26B-AS1	-0.300834	2.37674e-11	negative		GSDMD	AC103740.1	-0.315568	2.13601e-12	negative
HELLS	AC103923.1	0.621114	8.32481e-52	postive		BCL2A1	KIF26B-AS1	0.34568	1.01022e-14	postive		IL1B	AC103740.1	0.403355	6.22273e-20	postive
ZEB1	AL442125.2	0.621045	8.60383e-52	postive		BCL2L11	KIF26B-AS1	0.432699	5.28041e-23	postive		SCAF11	AC103740.1	0.667011	3.45715e-62	postive
HELLS	N4BP2L2-IT2	0.620852	9.4382e-52	postive		BCL2A1	AC090877.2	0.440284	7.5624e-24	postive		SCAF11	ABALON	0.394993	4.12166e-19	postive
HELLS	AC004584.1	0.620416	1.16193e-51	postive		BAK1	AC018645.3	-0.316762	1.74701e-12	negative		SCAF11	AC027237.5	0.342253	1.91446e-14	postive
HELLS	AL121672.1	0.620379	1.18243e-51	postive		BCL2L12	AC018645.3	-0.312093	3.81673e-12	negative		IL1B	C2orf27A	0.373474	4.20028e-17	postive
EPAS1	AL136084.3	0.620293	1.23162e-51	postive		BAD	PCBP1-AS1	-0.318824	1.23146e-12	negative		SCAF11	C2orf27A	0.605815	1.0232e-48	postive
HELLS	ITGB5-AS1	0.620046	1.38561e-51	postive		BCL2A1	PCBP1-AS1	0.313445	3.04784e-12	postive		SCAF11	AC090517.2	0.598278	2.96027e-47	postive
ZEB1	AP000919.1	0.620022	1.40171e-51	postive		BCL2L11	PCBP1-AS1	0.574234	7.6529e-43	postive		IL1B	AC079209.2	0.585016	8.92281e-45	postive
PTGS2	AC012358.4	0.619834	1.53268e-51	postive		BCL2L12	PCBP1-AS1	-0.360892	5.37169e-16	negative		SCAF11	AC079209.2	0.509058	1.50903e-32	postive
HELLS	AL512652.1	0.619559	1.74701e-51	postive		BAD	AC004466.3	-0.359607	6.92513e-16	negative		IL1B	AC023510.2	0.361827	4.46149e-16	postive
HELLS	AC007285.1	0.619512	1.786e-51	postive		BCL2A1	AC004466.3	0.349083	5.31227e-15	postive		SCAF11	AC023510.2	0.616656	6.89069e-51	postive
HELLS	AC093752.2	0.619229	2.04359e-51	postive		BCL2L11	AC004466.3	0.474999	5.41523e-28	postive		SCAF11	AC004551.1	0.540628	2.96967e-37	postive
HELLS	AL513327.1	0.619207	2.06494e-51	postive		BCL2L12	AC004466.3	-0.308243	7.1971e-12	negative		SCAF11	VIPR1-AS1	0.526739	4.01873e-35	postive
ZEB1	AC083862.1	0.619014	2.2629e-51	postive		BAD	AC095055.1	-0.36399	2.89787e-16	negative		SCAF11	TAPT1-AS1	0.321237	8.15256e-13	postive
ZEB1	ZNF790-AS1	0.618939	2.34497e-51	postive		BCL2L11	AC095055.1	0.454062	1.95034e-25	postive		PLCG1	AC245052.4	0.335481	6.61855e-14	postive
ZEB1	AC124312.2	0.618761	2.55143e-51	postive		BCL2L12	AC095055.1	-0.340889	2.46376e-14	negative		PLCG1	AL031714.1	0.540521	3.08646e-37	postive
HELLS	LINC02156	0.61875	2.56403e-51	postive		BAD	AL138759.1	-0.341116	2.36274e-14	negative		CASP6	AC004264.1	-0.336759	5.24954e-14	negative
HELLS	AL512506.1	0.61871	2.61401e-51	postive		BCL2L11	AL138759.1	0.477273	2.78674e-28	postive		NOD2	DNAJC3-DT	0.305044	1.21055e-11	postive
HELLS	LINC02614	0.618643	2.6971e-51	postive		BCL2L12	AL138759.1	-0.310271	5.15854e-12	negative		PLCG1	DNAJC3-DT	0.300201	2.62834e-11	postive
HELLS	WARS2-AS1	0.618619	2.72806e-51	postive		BCL2L11	AC009262.1	0.344103	1.3571e-14	postive		SCAF11	DNAJC3-DT	0.373811	3.91768e-17	postive
HELLS	AP000919.1	0.618388	3.04422e-51	postive		BCL2L11	AP006621.2	0.316728	1.75696e-12	postive		IL1B	LINC01139	0.317088	1.65316e-12	postive
ZEB1	AL158825.2	0.618336	3.11902e-51	postive		BCL2L2	AP006621.2	0.332827	1.06731e-13	postive		IL1B	AC007684.2	0.498346	4.64288e-31	postive
ZEB1	LINC01655	0.618323	3.13943e-51	postive		BCL2A1	GSEC	0.385411	3.37035e-18	postive		SCAF11	AC007684.2	0.694925	1.84112e-69	postive
HELLS	AC138932.6	0.618222	3.29256e-51	postive		BCL2L11	GSEC	0.392385	7.35152e-19	postive		PLCG1	AL162595.1	0.307239	8.47862e-12	postive
ZEB1	AL110115.1	0.618191	3.34037e-51	postive		BAD	AC027808.2	-0.365033	2.35067e-16	negative		SCAF11	AL162595.1	0.423777	4.88205e-22	postive
HELLS	AC078846.1	0.618164	3.3833e-51	postive		BCL2A1	AC027808.2	0.300799	2.38996e-11	postive		GSDMA	LINC00239	0.303105	1.65393e-11	postive
CRYAB	AC005180.2	0.618129	3.44024e-51	postive		BCL2L11	AC027808.2	0.447425	1.15982e-24	postive		SCAF11	AC092903.2	0.50534	5.0248e-32	postive
ZEB1	AL138820.1	0.618077	3.52576e-51	postive		BCL2L12	AC027808.2	-0.336422	5.58102e-14	negative		GSDMD	MAFG-DT	0.37091	7.12526e-17	postive
HELLS	AC005062.1	0.618048	3.57519e-51	postive		BCL2L11	ARRDC3-AS1	0.474939	5.51015e-28	postive		SCAF11	MAFG-DT	-0.322506	6.55314e-13	negative
HELLS	AC090510.2	0.617884	3.86332e-51	postive		BCL2L12	ARRDC3-AS1	-0.310999	4.57528e-12	negative		IL1B	MIR181A2HG	0.306457	9.62822e-12	postive
HELLS	AC010245.2	0.617555	4.5126e-51	postive		BAD	SMG7-AS1	-0.352289	2.87878e-15	negative		SCAF11	MIR181A2HG	0.631502	5.28761e-54	postive
ZEB1	AC024940.6	0.617404	4.84485e-51	postive		BCL2L11	SMG7-AS1	0.38598	2.98074e-18	postive		PLCG1	AC124798.1	0.349173	5.22168e-15	postive
ZEB1	AC020978.3	0.617376	4.9084e-51	postive		BCL2L2	SMG7-AS1	0.430115	1.01256e-22	postive		SCAF11	AL450384.2	0.394806	4.29691e-19	postive
HELLS	RNF139-AS1	0.617331	5.01521e-51	postive		BID	SMG7-AS1	-0.319783	1.04587e-12	negative		IL1B	AC040904.1	0.421879	7.76966e-22	postive
HELLS	AC007362.1	0.617309	5.06765e-51	postive		BCL2L11	AL136304.1	0.314076	2.74333e-12	postive		SCAF11	AC040904.1	0.722681	1.42308e-77	postive
ZEB1	AC007622.2	0.617284	5.12625e-51	postive		BAD	AC005540.1	-0.343559	1.50191e-14	negative		SCAF11	AC009974.1	0.318902	1.21542e-12	postive
ZEB1	NEAT1	0.617103	5.5833e-51	postive		BCL2L11	AC005540.1	0.497672	5.73776e-31	postive		SCAF11	CCDC18-AS1	0.591136	6.61751e-46	postive
HELLS	AC087277.2	0.617007	5.84273e-51	postive		BCL2L12	AC005540.1	-0.327249	2.87032e-13	negative		IL1B	AL121987.2	0.317223	1.61587e-12	postive
HELLS	WASHC5-AS1	0.616997	5.86972e-51	postive		BAD	C5orf66	-0.312108	3.80723e-12	negative		SCAF11	AL121987.2	0.559503	2.58399e-40	postive
HELLS	ANKRD10-IT1	0.616963	5.96254e-51	postive		BCL2L2	SLC25A21-AS1	0.339912	2.94933e-14	postive		IL1B	AP001528.1	0.318327	1.34008e-12	postive
PTGS2	AC019254.1	0.616543	7.26791e-51	postive		BAD	AC114781.2	-0.328236	2.41294e-13	negative		SCAF11	AP001528.1	0.607521	4.71802e-49	postive
ZEB1	AL021328.1	0.616529	7.31534e-51	postive		BCL2A1	AC114781.2	0.363107	3.45779e-16	postive		SCAF11	AL110115.2	0.374338	3.51145e-17	postive
ZEB1	YEATS2-AS1	0.616043	9.1879e-51	postive		BCL2L11	AC114781.2	0.538148	7.25391e-37	postive		PLCG1	TSC22D1-AS1	0.305414	1.14027e-11	postive
HELLS	AL138921.2	0.616011	9.33075e-51	postive		BCL2A1	LINC02649	0.476132	3.89152e-28	postive		SCAF11	TSC22D1-AS1	0.461434	2.57082e-26	postive
HELLS	AP000350.6	0.615924	9.71861e-51	postive		BCL2L11	LINC02649	0.510628	9.04085e-33	postive		SCAF11	AL158163.2	0.60702	5.92523e-49	postive
HELLS	AC105036.3	0.615906	9.80073e-51	postive		FAS	MIR924HG	0.330293	1.67701e-13	postive		IL1B	AL080317.1	0.439147	1.0151e-23	postive
ZEB1	AC104462.2	0.615638	1.11128e-50	postive		BAD	AP000873.2	-0.386869	2.4588e-18	negative		SCAF11	AL080317.1	0.701493	2.69537e-71	postive
HELLS	AC022973.5	0.615585	1.13889e-50	postive		BCL2L11	AP000873.2	0.513035	4.09844e-33	postive		PYCARD	KMT2E-AS1	0.355345	1.59486e-15	postive
ZEB1	PLS1-AS1	0.615566	1.14955e-50	postive		BCL2L12	AP000873.2	-0.368072	1.27184e-16	negative		PLCG1	LINC00886	0.31194	3.9152e-12	postive
HELLS	AC096992.2	0.615533	1.1674e-50	postive		TNFRSF1A	AP000873.2	-0.323677	5.35191e-13	negative		IL1B	AC083805.2	0.403839	5.56886e-20	postive
ZEB1	AC004943.1	0.615455	1.21062e-50	postive		BAD	FAM53B-AS1	-0.346968	7.92702e-15	negative		SCAF11	AC083805.2	0.655024	2.66384e-59	postive
ZEB1	DLEU1	0.615343	1.27587e-50	postive		BCL2L11	FAM53B-AS1	0.54678	3.13702e-38	postive		IL1B	AC010422.4	0.38641	2.71592e-18	postive
ZEB1	AC108058.1	0.615074	1.44712e-50	postive		BCL2L12	FAM53B-AS1	-0.338753	3.64818e-14	negative		SCAF11	AC010422.4	0.699706	8.60049e-71	postive
HELLS	EBLN3P	0.614985	1.50841e-50	postive		BCL2	LINC00900	0.342884	1.70277e-14	postive		IL1B	AC018926.1	0.339264	3.32219e-14	postive
ZEB1	AC009996.1	0.614495	1.89583e-50	postive		BCL2A1	LINC00900	0.541208	2.40679e-37	postive		SCAF11	AC018926.1	0.684327	1.32681e-66	postive
LOX	MIR100HG	0.614301	2.07611e-50	postive		BCL2L11	LINC00900	0.407015	2.67443e-20	postive		CASP6	LINC01561	-0.310833	4.70173e-12	negative
LOX	AC112721.1	0.614042	2.34249e-50	postive		BCL2L12	LINC00900	-0.311806	4.00299e-12	negative		IL1B	LINC01561	0.447502	1.13636e-24	postive
ZEB1	PITRM1-AS1	0.613898	2.50515e-50	postive		BMF	LINC00900	0.300619	2.45932e-11	postive		SCAF11	AC022893.1	0.594691	1.42328e-46	postive
HELLS	CARMN	0.613816	2.60246e-50	postive		BCL2L12	HAND2-AS1	-0.308853	6.51261e-12	negative		IL1B	AC023794.3	0.318283	1.35029e-12	postive
HELLS	LINC01376	0.613782	2.64325e-50	postive		BCL2L2	HAND2-AS1	0.408455	1.91282e-20	postive		SCAF11	AC023794.3	0.526337	4.61577e-35	postive
LOX	AP000695.2	0.613774	2.65408e-50	postive		TNFSF10	AP001372.2	0.337493	4.59283e-14	postive		SCAF11	AL592435.1	0.669176	1.00674e-62	postive
HELLS	AC012313.5	0.613773	2.65484e-50	postive		BAD	AC020661.3	-0.351496	3.35167e-15	negative		IL1B	FLNB-AS1	0.335668	6.39749e-14	postive
ZEB1	AC138393.3	0.613481	3.04118e-50	postive		BCL2A1	AC020661.3	0.359143	7.58788e-16	postive		SCAF11	FLNB-AS1	0.579015	1.08507e-43	postive
PTGS2	AC133644.1	0.613216	3.43934e-50	postive		BCL2L11	AC020661.3	0.469165	2.90893e-27	postive		GSDMD	U62317.2	0.428672	1.45293e-22	postive
HELLS	GNG12-AS1	0.613216	3.43977e-50	postive		BCL2L12	AC020661.3	-0.317309	1.59267e-12	negative		IL1B	AC018752.1	0.321509	7.78038e-13	postive
HELLS	AL442125.1	0.61309	3.64712e-50	postive		BAD	AL513327.1	-0.36809	1.26733e-16	negative		SCAF11	AC018752.1	0.685736	5.62261e-67	postive
ZEB1	AC093278.2	0.612849	4.07772e-50	postive		BCL2A1	AL513327.1	0.363569	3.15284e-16	postive		SCAF11	AC008969.1	0.303935	1.44758e-11	postive
ZEB1	AC010168.1	0.612835	4.10404e-50	postive		BCL2L11	AL513327.1	0.527534	3.05315e-35	postive		SCAF11	AC104035.1	0.354896	1.74004e-15	postive
ZEB1	AC022150.4	0.612785	4.20106e-50	postive		BCL2L12	AL513327.1	-0.34352	1.51274e-14	negative		IL1B	TTC3-AS1	0.329852	1.81345e-13	postive
ZEB1	AC025031.4	0.612743	4.28447e-50	postive		BAD	AC007216.2	-0.372437	5.20444e-17	negative		SCAF11	TTC3-AS1	0.67256	1.43332e-63	postive
HELLS	AC073326.1	0.612738	4.29303e-50	postive		BCL2L11	AC007216.2	0.445864	1.75401e-24	postive		IL1B	AC020915.1	0.354473	1.88901e-15	postive
ZEB1	AC087893.3	0.61261	4.55528e-50	postive		BCL2L12	AC007216.2	-0.338455	3.85318e-14	negative		SCAF11	AC020915.1	0.675952	1.97844e-64	postive
LOX	LINC00900	0.612335	5.17534e-50	postive		BCL2L11	AL353708.3	0.428244	1.61673e-22	postive		IL1B	AC018410.1	0.519131	5.37665e-34	postive
LOX	AL356417.2	0.611879	6.39071e-50	postive		CASP10	BX640514.2	0.311229	4.40447e-12	postive		SCAF11	AC018410.1	0.626719	5.56164e-53	postive
ZEB1	PRR26	0.611824	6.55419e-50	postive		RIPK1	BX640514.2	0.349879	4.56597e-15	postive		IL1B	AL022097.1	0.455916	1.17712e-25	postive
PTGS2	AL360219.2	0.61182	6.56764e-50	postive		BAD	MANEA-DT	-0.339323	3.28638e-14	negative		SCAF11	AL022097.1	0.687301	2.15374e-67	postive
PTGS2	NEAT1	0.611812	6.5917e-50	postive		BCL2L11	MANEA-DT	0.424676	3.91352e-22	postive		PLCG1	AL691482.4	0.3375	4.58676e-14	postive
ZEB1	RNF216-IT1	0.611803	6.6194e-50	postive		BCL2L12	MANEA-DT	-0.324975	4.2718e-13	negative		SCAF11	AP001189.1	0.330349	1.66046e-13	postive
ZEB1	AC026367.3	0.611771	6.71887e-50	postive		BCL2L11	AL139099.3	0.318361	1.33237e-12	postive		SCAF11	AC011337.1	0.416083	3.15359e-21	postive
ZEB1	AC007285.1	0.611709	6.91252e-50	postive		BCL2L2	AL139099.3	0.432	6.3016e-23	postive		IL1B	PSPC1-AS2	0.388963	1.55907e-18	postive
ZEB1	MACC1-AS1	0.611707	6.92119e-50	postive		BAD	MORF4L2-AS1	-0.371849	5.87496e-17	negative		SCAF11	PSPC1-AS2	0.590152	1.00928e-45	postive
HELLS	AC087222.1	0.611705	6.92732e-50	postive		BCL2L11	MORF4L2-AS1	0.341686	2.12641e-14	postive		TNF	BHLHE40-AS1	0.325888	3.64325e-13	postive
ZEB1	AC008760.2	0.611449	7.79633e-50	postive		BCL2L12	MORF4L2-AS1	-0.326642	3.19304e-13	negative		SCAF11	AC104791.1	0.520754	3.10808e-34	postive
ZEB1	AC005757.1	0.611412	7.93061e-50	postive		TNFRSF1A	MORF4L2-AS1	-0.306058	1.02723e-11	negative		IL1B	SMAD9-IT1	0.410982	1.05829e-20	postive
ZEB1	NDUFV2-AS1	0.611393	7.99767e-50	postive		BCL2L11	AL021392.1	0.312367	3.64709e-12	postive		SCAF11	SMAD9-IT1	0.399447	1.51558e-19	postive
HELLS	AC112503.2	0.611199	8.74782e-50	postive		BID	LINC01843	0.403937	5.44427e-20	postive		IL1B	CARNMT1-AS1	0.406014	3.37241e-20	postive
ZEB1	DLGAP4-AS1	0.610989	9.63566e-50	postive		BCL2L11	AC116914.2	0.420864	9.94901e-22	postive		SCAF11	CARNMT1-AS1	0.716662	9.88594e-76	postive
ZEB1	AL139393.3	0.610977	9.69039e-50	postive		BCL2L12	AP001505.1	0.333362	9.69604e-14	postive		SCAF11	AC103858.1	0.493216	2.29595e-30	postive
ZEB1	AC019080.5	0.610916	9.96834e-50	postive		FAS	AP001505.1	-0.304404	1.34218e-11	negative		SCAF11	CNOT10-AS1	0.692928	6.49935e-69	postive
HELLS	AL031710.2	0.610799	1.05179e-49	postive		BCL2L11	POC1B-AS1	0.439843	8.47776e-24	postive		IL1B	AC005776.2	0.488526	9.67274e-30	postive
ZEB1	AC027288.3	0.610796	1.05345e-49	postive		BCL2L12	POC1B-AS1	-0.309821	5.55597e-12	negative		SCAF11	AC005776.2	0.595335	1.0752e-46	postive
ZEB1	AL121929.3	0.610752	1.07481e-49	postive		BAD	AC109460.2	-0.330859	1.51654e-13	negative		SCAF11	AC009090.3	0.678963	3.33657e-65	postive
HELLS	AL121845.4	0.610677	1.11281e-49	postive		BCL2L11	AC109460.2	0.426269	2.64057e-22	postive		IL1B	AP003555.1	0.36533	2.21453e-16	postive
HELLS	AC114763.1	0.610557	1.17595e-49	postive		BCL2L2	AC109460.2	0.373509	4.1701e-17	postive		SCAF11	AP003555.1	0.333812	8.94254e-14	postive
ZEB1	AC018926.2	0.610515	1.19893e-49	postive		BID	AC109460.2	-0.316677	1.77202e-12	negative		SCAF11	PRR34	0.415001	4.08358e-21	postive
HELLS	MANEA-DT	0.610278	1.3369e-49	postive		BID	MCF2L-AS1	0.344971	1.15373e-14	postive		IL1B	AC002550.2	0.533956	3.22719e-36	postive
ZEB1	AL359880.1	0.610239	1.36129e-49	postive		FAS	MCF2L-AS1	-0.333587	9.31147e-14	negative		SCAF11	AC002550.2	0.569054	6.12899e-42	postive
PTGS2	Z97200.1	0.610231	1.36606e-49	postive		RIPK1	MCF2L-AS1	-0.312789	3.39988e-12	negative		SCAF11	AL132642.1	0.473787	7.6984e-28	postive
HELLS	AC091057.1	0.610176	1.40103e-49	postive		BAK1	AC074117.1	-0.322149	6.96978e-13	negative		PLCG1	AC011462.4	0.313196	3.17729e-12	postive
ZEB1	AC006017.1	0.609976	1.53586e-49	postive		CSE1L	AC074117.1	0.307357	8.31642e-12	postive		SCAF11	AC099792.1	0.359835	6.61969e-16	postive
HELLS	AC084117.1	0.60996	1.54737e-49	postive		FAS	AC074117.1	-0.303737	1.49434e-11	negative		IL1B	AC004223.2	0.431565	7.03211e-23	postive
ZEB1	AC010618.3	0.609608	1.8181e-49	postive		BMF	LINC02593	0.458319	6.08916e-26	postive		SCAF11	AC004223.2	0.693312	5.10527e-69	postive
ZEB1	AC005062.1	0.609591	1.83235e-49	postive		BCL2L2	AC022167.2	0.361955	4.34963e-16	postive		SCAF11	AC211476.4	0.577355	2.14562e-43	postive
ZEB1	AL031667.3	0.609476	1.93173e-49	postive		BAD	AL031985.3	-0.316707	1.76332e-12	negative		SCAF11	AC013403.2	0.532507	5.38078e-36	postive
HELLS	AC064801.1	0.609318	2.07654e-49	postive		BAK1	AL031985.3	-0.32592	3.62316e-13	negative		IL1B	AC112721.1	0.499197	3.55236e-31	postive
ZEB1	AC120049.1	0.609311	2.0836e-49	postive		BCL2L11	AL031985.3	0.314676	2.48121e-12	postive		SCAF11	AC112721.1	0.422377	6.8809e-22	postive
HELLS	GHRLOS	0.60924	2.1527e-49	postive		BCL2L12	AL031985.3	-0.303251	1.61565e-11	negative		IL1B	SNHG26	0.517689	8.72446e-34	postive
ZEB1	AC105339.3	0.609149	2.24418e-49	postive		TNFRSF1A	AL031985.3	-0.318783	1.24023e-12	negative		SCAF11	SNHG26	0.587475	3.15922e-45	postive
ZEB1	AC084876.1	0.609128	2.2654e-49	postive		FAS	DLGAP1-AS5	0.320323	9.53518e-13	postive		SCAF11	AC018695.4	0.622428	4.43584e-52	postive
HELLS	AP002490.1	0.609049	2.34905e-49	postive		TNFSF10	DLGAP1-AS5	0.372126	5.54888e-17	postive		IL1B	AC022400.5	0.339047	3.45719e-14	postive
HELLS	AC131953.2	0.608908	2.50528e-49	postive		BAD	AC009812.3	-0.339319	3.28927e-14	negative		SCAF11	AC022400.5	0.480978	9.34395e-29	postive
ZEB1	MKNK1-AS1	0.608654	2.81431e-49	postive		BCL2L11	AC009812.3	0.369757	9.02234e-17	postive		IL1B	AC002563.1	0.302585	1.79756e-11	postive
ZEB1	AL355916.2	0.608454	3.08286e-49	postive		BCL2L12	AC009812.3	-0.337187	4.85613e-14	negative		SCAF11	AC002563.1	0.54394	8.90603e-38	postive
HELLS	MAL2-AS1	0.608438	3.10564e-49	postive		FAS	LNCTAM34A	0.397333	2.44148e-19	postive		IL1B	MRTFA-AS1	0.558137	4.36908e-40	postive
ZEB1	AC006213.5	0.608423	3.12679e-49	postive		TNFRSF10B	LNCTAM34A	0.410639	1.1471e-20	postive		SCAF11	MRTFA-AS1	0.667984	1.98859e-62	postive
ZEB1	PTPRG-AS1	0.608273	3.34958e-49	postive		BAD	SNHG14	-0.319607	1.07763e-12	negative		IL1B	AL121845.4	0.334698	7.62422e-14	postive
ZEB1	AC005479.2	0.608214	3.44064e-49	postive		BAK1	SNHG14	-0.310616	4.87398e-12	negative		SCAF11	AL121845.4	0.583836	1.46466e-44	postive
HELLS	RDH10-AS1	0.608172	3.50734e-49	postive		BCL2L11	SNHG14	0.378775	1.38783e-17	postive		IL1B	AC025569.1	0.529723	1.4269e-35	postive
HELLS	AC015914.1	0.608015	3.76673e-49	postive		BCL2L12	SNHG14	-0.362453	3.93963e-16	negative		SCAF11	AC025569.1	0.668405	1.56417e-62	postive
ZEB1	AC107993.1	0.607593	4.56543e-49	postive		BAD	AC040934.1	-0.334996	7.22456e-14	negative		SCAF11	AP001619.1	0.385851	3.06449e-18	postive
ZEB1	AC096642.1	0.607573	4.60801e-49	postive		BCL2L11	AC040934.1	0.424522	4.06542e-22	postive		SCAF11	AC078860.2	0.346199	9.16281e-15	postive
ZEB1	AP002026.1	0.607496	4.77156e-49	postive		BCL2L11	AC023043.4	0.39674	2.78886e-19	postive		IL1B	AC137932.2	0.383652	4.91984e-18	postive
HELLS	AC004466.2	0.607441	4.89303e-49	postive		CASP10	AC023043.4	0.336337	5.66766e-14	postive		SCAF11	AC137932.2	0.577078	2.40363e-43	postive
ZEB1	AL360093.1	0.607412	4.958e-49	postive		BAD	LINC02156	-0.332541	1.12342e-13	negative		SCAF11	LINC02100	0.478951	1.7016e-28	postive
ZEB1	AL354993.1	0.607202	5.45525e-49	postive		BCL2L11	LINC02156	0.441449	5.58641e-24	postive		IL1B	AC092171.1	0.378863	1.36226e-17	postive
ZEB1	RDH10-AS1	0.60688	6.31386e-49	postive		BCL2L12	LINC02156	-0.322957	6.06252e-13	negative		SCAF11	AC092171.1	0.640642	5.24341e-56	postive
HELLS	AC006460.1	0.606838	6.43526e-49	postive		BCL2L2	AL109741.1	0.378191	1.56951e-17	postive		IL1B	EGOT	0.36164	4.63057e-16	postive
HELLS	MRAP-AS1	0.606775	6.62254e-49	postive		CASP7	AC009163.6	0.392948	6.49165e-19	postive		SCAF11	EGOT	0.66162	7.13457e-61	postive
HELLS	AC092718.2	0.606728	6.76485e-49	postive		BCL2L11	AC013472.2	0.412263	7.82382e-21	postive		TNF	U62317.4	0.409409	1.53053e-20	postive
ZEB1	AC009159.3	0.606386	7.89915e-49	postive		BCL2L2	AC013472.2	0.385409	3.37135e-18	postive		SCAF11	AC073529.1	0.606781	6.60285e-49	postive
HELLS	AC019131.2	0.606372	7.95117e-49	postive		BMF	LINC00865	0.310598	4.8882e-12	postive		IL1B	ALKBH3-AS1	0.313878	2.83542e-12	postive
HELLS	AC092436.3	0.606365	7.9745e-49	postive		BCL2A1	GK-AS1	0.546955	2.94003e-38	postive		SCAF11	ALKBH3-AS1	0.657971	5.34587e-60	postive
ZEB1	AC004637.1	0.606213	8.543e-49	postive		BCL2L11	GK-AS1	0.44437	2.60099e-24	postive		IL1B	AC124312.2	0.322297	6.79373e-13	postive
HELLS	AC083843.3	0.606106	8.96991e-49	postive		BAD	AC066613.1	-0.367218	1.51241e-16	negative		SCAF11	AC124312.2	0.483845	3.97476e-29	postive
ZEB1	AC006460.1	0.606103	8.98063e-49	postive		BCL2A1	AC066613.1	0.362635	3.79865e-16	postive		IL1B	DARS-AS1	0.413031	6.52306e-21	postive
PRKAA2	AC025917.1	0.605431	1.21692e-48	postive		BCL2L11	AC066613.1	0.585609	6.95168e-45	postive		SCAF11	DARS-AS1	0.425851	2.92829e-22	postive
HELLS	AC093382.1	0.605267	1.31104e-48	postive		BCL2L12	AC066613.1	-0.370251	8.15605e-17	negative		SCAF11	Z93022.1	0.477603	2.52964e-28	postive
ZEB1	AC010300.1	0.605254	1.31821e-48	postive		BCL2L2	AC066613.1	0.371925	5.78417e-17	postive		SCAF11	AC068790.5	0.680834	1.09144e-65	postive
PTGS2	AC087392.2	0.605139	1.38859e-48	postive		BAD	AC245884.8	-0.305036	1.21207e-11	negative		IL1B	MIR223HG	0.733584	4.89612e-81	postive
ZEB1	LINC00900	0.605083	1.42413e-48	postive		BCL2L11	AC245884.8	0.327919	2.55177e-13	postive		SCAF11	MIR223HG	0.411337	9.73401e-21	postive
ZEB1	AL512656.2	0.605025	1.46184e-48	postive		BAK1	NNT-AS1	-0.357129	1.12649e-15	negative		TNF	MIR223HG	0.484993	2.81563e-29	postive
HELLS	AC090517.2	0.604918	1.53443e-48	postive		BCL2L12	NNT-AS1	-0.376571	2.20496e-17	negative		SCAF11	AC011700.1	0.330553	1.60139e-13	postive
ZEB1	PKP4-AS1	0.604918	1.53443e-48	postive		CSE1L	NNT-AS1	0.343419	1.54169e-14	postive		IL1B	ODF2-AS1	0.369977	8.62655e-17	postive
HELLS	AC092718.5	0.6049	1.54664e-48	postive		TNFRSF1A	NNT-AS1	-0.368918	1.07073e-16	negative		SCAF11	ODF2-AS1	0.562675	7.55806e-41	postive
ZEB1	AC084782.3	0.604871	1.56707e-48	postive		BAD	AL049840.2	-0.38909	1.51637e-18	negative		GSDMD	AC009088.2	0.341655	2.13881e-14	postive
HELLS	AC245884.10	0.60463	1.74729e-48	postive		BCL2A1	AL049840.2	0.35634	1.31405e-15	postive		IL1B	RPS6KA2-IT1	0.442988	3.73736e-24	postive
ZEB1	MEIS1-AS2	0.604622	1.753e-48	postive		BCL2L11	AL049840.2	0.572775	1.38057e-42	postive		SCAF11	RPS6KA2-IT1	0.538093	7.39817e-37	postive
HELLS	PCBP1-AS1	0.604364	1.96939e-48	postive		BCL2L12	AL049840.2	-0.362111	4.21676e-16	negative		GSDMD	AL121832.2	0.372148	5.52407e-17	postive
ZEB1	AL360091.1	0.604306	2.02097e-48	postive		BCL2L2	AL049840.2	0.36269	3.75792e-16	postive		PLCG1	AL121832.2	0.343996	1.38447e-14	postive
HELLS	AL162734.1	0.60419	2.12978e-48	postive		BAD	NSMCE1-DT	-0.302145	1.92878e-11	negative		PYCARD	AL121832.2	0.369044	1.04364e-16	postive
HELLS	AC008537.2	0.604078	2.23959e-48	postive		BCL2L11	NSMCE1-DT	0.411539	9.28146e-21	postive		SCAF11	AL121832.2	-0.303286	1.6065e-11	negative
HELLS	Z83843.1	0.604033	2.28593e-48	postive		BCL2L12	NSMCE1-DT	-0.305764	1.07743e-11	negative		IL1B	TH2LCRR	0.365039	2.34786e-16	postive
ZEB1	LINC02595	0.60396	2.36211e-48	postive		BAD	AC000061.1	-0.305516	1.1216e-11	negative		SCAF11	TH2LCRR	0.684138	1.48825e-66	postive
ZEB1	AL133230.2	0.603741	2.60571e-48	postive		BCL2L11	AC000061.1	0.334454	7.96661e-14	postive		SCAF11	AC023825.2	0.401262	1.0038e-19	postive
ZEB1	AC138932.6	0.603728	2.62171e-48	postive		BCL2L11	AC008764.2	0.430534	9.11519e-23	postive		PLCG1	AC021218.1	0.332389	1.15444e-13	postive
LOX	LINC01943	0.603704	2.64923e-48	postive		BCL2L12	AC008764.2	-0.321367	7.97291e-13	negative		SCAF11	AL133410.1	0.301377	2.18023e-11	postive
HELLS	AL157400.4	0.60355	2.83896e-48	postive		BCL2L2	AC008764.2	0.336945	5.07492e-14	postive		PYCARD	AC011511.3	0.319515	1.09478e-12	postive
PTGS2	CD44-AS1	0.603502	2.90095e-48	postive		BAD	C1orf147	-0.335807	6.23872e-14	negative		TNF	AC021188.1	0.314233	2.6722e-12	postive
ZEB1	AC090197.1	0.603077	3.5106e-48	postive		BCL2L11	C1orf147	0.484178	3.59692e-29	postive		GSDMD	ATP2A1-AS1	0.315576	2.13326e-12	postive
HELLS	AC107021.1	0.603044	3.56188e-48	postive		BCL2L12	C1orf147	-0.30962	5.74258e-12	negative		PLCG1	AC003070.1	0.32692	3.04098e-13	postive
ZEB1	MYB-AS1	0.602913	3.777e-48	postive		BAD	AC024075.1	-0.314055	2.75308e-12	negative		PLCG1	AC135388.1	0.378699	1.41013e-17	postive
ZEB1	PABPC4-AS1	0.602627	4.29385e-48	postive		BCL2	AC024075.1	0.310257	5.17079e-12	postive		IL1B	LINC02362	0.306427	9.67632e-12	postive
LOX	AC134312.5	0.602625	4.29803e-48	postive		BCL2L11	AC024075.1	0.497735	5.62473e-31	postive		SCAF11	LINC02362	0.352817	2.60082e-15	postive
HELLS	AL357874.2	0.602529	4.48532e-48	postive		BCL2L12	AC024075.1	-0.372934	4.69747e-17	negative		IL1B	AC007278.1	0.689134	6.94748e-68	postive
ZEB1	AC092681.2	0.602383	4.7893e-48	postive		BCL2L2	AC024075.1	0.33377	9.0112e-14	postive		SCAF11	AC007278.1	0.443306	3.43934e-24	postive
HELLS	AL049780.1	0.602261	5.0559e-48	postive		BAD	AC079793.1	-0.350738	3.87544e-15	negative		IL1B	CASC15	0.348387	6.06244e-15	postive
ZEB1	AC092171.1	0.602254	5.0737e-48	postive		BCL2A1	AC079793.1	0.475841	4.23664e-28	postive		SCAF11	CASC15	0.606684	6.90081e-49	postive
ZEB1	AL008718.3	0.602207	5.18118e-48	postive		BCL2L11	AC079793.1	0.50434	6.92821e-32	postive		IL1B	AL031775.2	0.453167	2.48661e-25	postive
ZEB1	AL049539.1	0.601953	5.80127e-48	postive		BCL2L12	AC079793.1	-0.316373	1.86549e-12	negative		SCAF11	AL031775.2	0.687712	1.67219e-67	postive
HELLS	FMR1-IT1	0.601887	5.97627e-48	postive		BAD	AP000786.1	-0.376041	2.46317e-17	negative		SCAF11	AC008035.1	0.434151	3.65429e-23	postive
HELLS	AC023510.2	0.601737	6.3899e-48	postive		BCL2L11	AP000786.1	0.482015	6.86572e-29	postive		SCAF11	AOAH-IT1	0.59293	3.05468e-46	postive
HELLS	AC002563.1	0.60156	6.91246e-48	postive		BCL2L12	AP000786.1	-0.312873	3.35266e-12	negative		IL1B	AC092828.1	0.378466	1.48116e-17	postive
ZEB1	AC018410.1	0.601542	6.97091e-48	postive		BCL2L11	AC092535.5	0.420786	1.01413e-21	postive		SCAF11	AC092828.1	0.662349	4.75573e-61	postive
HELLS	LINC00894	0.601481	7.16122e-48	postive		BCL2L11	LINC02254	0.377964	1.6461e-17	postive		SCAF11	AL161729.2	0.525864	5.43374e-35	postive
ZEB1	AC068790.5	0.601413	7.38063e-48	postive		BAD	AC092802.4	-0.345735	9.9982e-15	negative		IL1B	AP000763.3	0.621412	7.21988e-52	postive
ZEB1	LINC01376	0.601384	7.47617e-48	postive		BCL2L11	AC092802.4	0.454674	1.65173e-25	postive		SCAF11	AP000763.3	0.637289	2.90182e-55	postive
ZEB1	AC068790.4	0.601381	7.4884e-48	postive		BCL2L12	AC092802.4	-0.322897	6.12589e-13	negative		SCAF11	AC145285.2	0.383708	4.86124e-18	postive
PTGS2	AL133330.1	0.601316	7.70729e-48	postive		BCL2A1	AL844908.1	0.415838	3.34439e-21	postive		SCAF11	AP003119.3	0.328899	2.14683e-13	postive
HELLS	AP000763.3	0.601282	7.82377e-48	postive		BCL2L11	AL844908.1	0.350859	3.78704e-15	postive		IL1B	AC005072.1	0.464619	1.05465e-26	postive
ZEB1	AL391834.1	0.601151	8.29617e-48	postive		BAK1	AL022316.1	0.339353	3.26834e-14	postive		SCAF11	AC005072.1	0.688505	1.0253e-67	postive
ZEB1	AC138956.1	0.601059	8.63976e-48	postive		TNFRSF10A	AL022316.1	0.30209	1.94566e-11	postive		IL1B	AC074050.4	0.35647	1.28116e-15	postive
ZEB1	AC087683.2	0.60092	9.1936e-48	postive		BCL2	AC060766.7	0.318885	1.21877e-12	postive		SCAF11	AC074050.4	0.615151	1.39563e-50	postive
ZEB1	CRTC3-AS1	0.600868	9.4091e-48	postive		BCL2A1	AC060766.7	0.479525	1.43662e-28	postive		PYCARD	AC044802.2	0.347066	7.78179e-15	postive
HELLS	MIR29B2CHG	0.600572	1.07287e-47	postive		BCL2L11	AC060766.7	0.463135	1.59924e-26	postive		IL1B	AC040169.3	0.361573	4.69317e-16	postive
PRKAA2	AC026367.3	0.600404	1.1559e-47	postive		BCL2L12	AC060766.7	-0.351697	3.22507e-15	negative		SCAF11	AC040169.3	0.575384	4.79771e-43	postive
HELLS	FOCAD-AS1	0.600364	1.17666e-47	postive		BCL2	AC138207.5	0.394633	4.46596e-19	postive		SCAF11	AC027279.1	0.620603	1.0628e-51	postive
ZEB1	MALAT1	0.600262	1.23106e-47	postive		BCL2A1	AC138207.5	0.396228	3.12826e-19	postive		SCAF11	AC107958.3	0.326231	3.43122e-13	postive
ZEB1	AC073651.1	0.600209	1.26061e-47	postive		BCL2L11	AC138207.5	0.446422	1.51339e-24	postive		SCAF11	DCUN1D2-AS	0.481056	9.13091e-29	postive
PRKAA2	ACTA2-AS1	0.600208	1.26105e-47	postive		BCL2L12	AC138207.5	-0.342901	1.69752e-14	negative		GSDMD	AL157932.1	-0.313599	2.97062e-12	negative
ZEB1	AC012358.4	0.600192	1.27009e-47	postive		FAS	AC138207.5	0.341078	2.37922e-14	postive		IL1B	AL157932.1	0.351049	3.65138e-15	postive
HELLS	L3MBTL4-AS1	0.600139	1.30034e-47	postive		BCL2L11	AC008870.4	0.462658	1.82711e-26	postive		SCAF11	AL157932.1	0.632373	3.42897e-54	postive
HELLS	AL442067.1	0.600139	1.30036e-47	postive		BCL2A1	AC090617.5	0.320608	9.08193e-13	postive		PLCG1	AC016773.2	0.306911	8.94365e-12	postive
ZEB1	EIF1AX-AS1	0.599928	1.42758e-47	postive		BCL2L11	AC090617.5	0.368535	1.15761e-16	postive		SCAF11	AC079336.5	0.445052	2.17323e-24	postive
ZEB1	AL157394.1	0.599813	1.50261e-47	postive		BAK1	AC013652.1	-0.320796	8.79316e-13	negative		GSDMD	AC004918.5	-0.318859	1.22417e-12	negative
HELLS	AC010618.3	0.599737	1.55414e-47	postive		BCL2L11	AC013652.1	0.301493	2.14012e-11	postive		IL1B	AC004918.5	0.321569	7.70063e-13	postive
HELLS	AC092953.2	0.599323	1.86631e-47	postive		BCL2L11	AL136295.7	0.376344	2.31187e-17	postive		SCAF11	AC004918.5	0.714947	3.24333e-75	postive
SLC1A5	BX322234.2	0.599241	1.93531e-47	postive		BCL2L2	AL136295.7	0.448271	9.25984e-25	postive		SCAF11	AC121761.1	0.411908	8.50792e-21	postive
ZEB1	NARF-IT1	0.59921	1.96147e-47	postive		CSE1L	AL139035.1	0.333604	9.28461e-14	postive		CASP6	AC008966.1	0.405096	4.16912e-20	postive
ZEB1	GARS1-DT	0.599069	2.08775e-47	postive		BAD	AC092794.1	-0.354332	1.94115e-15	negative		SCAF11	LAMTOR5-AS1	0.687177	2.32412e-67	postive
ZEB1	AC138207.5	0.59887	2.27939e-47	postive		BCL2L11	AC092794.1	0.432973	4.92748e-23	postive		SCAF11	AC015727.1	0.556569	7.95837e-40	postive
HELLS	AD001527.1	0.598792	2.3591e-47	postive		BCL2L12	AC092794.1	-0.332364	1.15948e-13	negative		IL1B	AC019254.1	0.61578	1.03976e-50	postive
ZEB1	MIR222HG	0.598724	2.43187e-47	postive		BAK1	OTUD6B-AS1	-0.385163	3.55541e-18	negative		SCAF11	AC019254.1	0.411892	8.54004e-21	postive
ZEB1	AC026202.2	0.59858	2.59087e-47	postive		BCL2L12	OTUD6B-AS1	-0.30212	1.93628e-11	negative		SCAF11	AF230666.1	0.684369	1.29347e-66	postive
ZEB1	SND1-IT1	0.598472	2.717e-47	postive		CSE1L	OTUD6B-AS1	0.410397	1.21426e-20	postive		IL1B	AC116913.1	0.321726	7.49522e-13	postive
ZEB1	AC132192.1	0.598203	3.05877e-47	postive		TNFRSF1A	OTUD6B-AS1	-0.344653	1.22453e-14	negative		SCAF11	AC116913.1	0.492161	3.17906e-30	postive
HELLS	AC026367.3	0.598062	3.25569e-47	postive		BCL2A1	LINC02656	0.559039	3.08914e-40	postive		SCAF11	ZNF252P-AS1	0.407622	2.32264e-20	postive
HELLS	AC012676.4	0.598014	3.32504e-47	postive		BCL2L11	LINC02656	0.464674	1.03838e-26	postive		IL1B	AP006259.1	0.742191	6.80104e-84	postive
ZEB1	AL358115.1	0.597832	3.60229e-47	postive		BCL2L2	AC023024.1	0.329666	1.87451e-13	postive		SCAF11	AP006259.1	0.611202	8.73717e-50	postive
HELLS	AC020891.3	0.597775	3.69359e-47	postive		BAD	AL121672.1	-0.320778	8.82073e-13	negative		SCAF11	Z68871.1	0.69223	1.00778e-68	postive
HELLS	CASC19	0.597156	4.84753e-47	postive		BCL2L11	AL121672.1	0.47976	1.34016e-28	postive		NOD2	TPT1-AS1	0.338028	4.16599e-14	postive
HELLS	AL355312.2	0.596803	5.65791e-47	postive		BCL2L12	AL121672.1	-0.323604	5.42018e-13	negative		PLCG1	TPT1-AS1	0.327458	2.76708e-13	postive
ZEB1	AL353593.2	0.596786	5.7015e-47	postive		BCL2L2	AL121672.1	0.303618	1.52316e-11	postive		SCAF11	TPT1-AS1	0.482468	5.99873e-29	postive
ZEB1	LINC01943	0.596707	5.9029e-47	postive		BAD	YEATS2-AS1	-0.396835	2.73032e-19	negative		IL1B	SLC7A11-AS1	0.51053	9.33502e-33	postive
ZEB1	AC018752.1	0.596699	5.92322e-47	postive		BCL2L11	YEATS2-AS1	0.529396	1.59909e-35	postive		SCAF11	SLC7A11-AS1	0.476038	4.00043e-28	postive
ZEB1	LINC00630	0.596572	6.26219e-47	postive		BCL2L12	YEATS2-AS1	-0.347455	7.23183e-15	negative		SCAF11	AC106820.3	0.389882	1.275e-18	postive
ZEB1	AC018682.1	0.596505	6.44797e-47	postive		BCL2L2	YEATS2-AS1	0.355108	1.66996e-15	postive		PYCARD	AC011451.1	-0.33239	1.15407e-13	negative
ZEB1	AC023510.2	0.596383	6.80287e-47	postive		BAD	ADNP-AS1	-0.362779	3.69157e-16	negative		SCAF11	AC011451.1	0.37177	5.97084e-17	postive
HELLS	C9orf147	0.596343	6.92158e-47	postive		BAK1	ADNP-AS1	-0.32133	8.02392e-13	negative		IL1B	AL356599.1	0.311623	4.12598e-12	postive
HELLS	AC087501.4	0.596332	6.95642e-47	postive		BCL2L11	ADNP-AS1	0.414964	4.12007e-21	postive		SCAF11	AL356599.1	0.690644	2.71853e-68	postive
ZEB1	ITGB5-AS1	0.596301	7.04914e-47	postive		BCL2L12	ADNP-AS1	-0.334267	8.23995e-14	negative		IL1B	AC090519.2	0.391632	8.68049e-19	postive
PTGS2	AC018926.2	0.596247	7.21948e-47	postive		BAD	AL035448.1	-0.373222	4.42577e-17	negative		SCAF11	AC090519.2	0.673651	7.6025e-64	postive
ZEB1	TPM1-AS	0.596057	7.84523e-47	postive		BCL2L11	AL035448.1	0.475251	5.03115e-28	postive		IL1B	AC093535.1	0.333355	9.70852e-14	postive
ZEB1	AC084824.5	0.595964	8.17048e-47	postive		BCL2L12	AL035448.1	-0.344494	1.26154e-14	negative		SCAF11	AC093535.1	0.682387	4.29319e-66	postive
HELLS	THAP9-AS1	0.59585	8.58772e-47	postive		BCL2L11	HNF1A-AS1	0.325011	4.24526e-13	postive		PLCG1	AC080129.2	0.359075	7.69043e-16	postive
HELLS	AL158163.2	0.595763	8.91886e-47	postive		BCL2L12	HNF1A-AS1	-0.305963	1.04316e-11	negative		IL1B	AC018557.2	0.489067	8.20339e-30	postive
ZEB1	AP001893.1	0.595753	8.95724e-47	postive		BID	AC004816.2	0.428774	1.41638e-22	postive		SCAF11	AC018557.2	0.71056	6.51237e-74	postive
PRKAA2	AF117829.1	0.595487	1.00604e-46	postive		BAD	LINC00624	-0.383566	5.0117e-18	negative		SCAF11	LINC01480	0.307165	8.58128e-12	postive
HELLS	FARSA-AS1	0.595062	1.21072e-46	postive		BCL2A1	LINC00624	0.331222	1.42164e-13	postive		GSDMD	SNHG25	0.413483	5.85959e-21	postive
HELLS	AC096708.2	0.59503	1.22805e-46	postive		BCL2L11	LINC00624	0.497698	5.69008e-31	postive		IL1B	AL136985.2	0.325437	3.94167e-13	postive
ZEB1	ATP2B1-AS1	0.594939	1.27738e-46	postive		BCL2L12	LINC00624	-0.347519	7.14425e-15	negative		SCAF11	AL136985.2	0.549827	1.0125e-38	postive
ZEB1	ZBED3-AS1	0.594627	1.46345e-46	postive		BAD	AC009120.2	-0.317732	1.48255e-12	negative		SCAF11	AC013468.1	0.537729	8.42857e-37	postive
PRKAA2	BNC2-AS1	0.594614	1.47186e-46	postive		BCL2L11	AC009120.2	0.402492	7.58231e-20	postive		IL1B	DNM3OS	0.382582	6.18622e-18	postive
HELLS	EGOT	0.594399	1.61559e-46	postive		BCL2L12	AC009120.2	-0.306755	9.17335e-12	negative		SCAF11	DNM3OS	0.613592	2.88772e-50	postive
ZEB1	AL157932.1	0.594227	1.74145e-46	postive		BAD	AC110792.3	-0.348688	5.72623e-15	negative		IL1B	AC096708.2	0.521814	2.17017e-34	postive
ZEB1	ATP11A-AS1	0.593915	1.99325e-46	postive		BCL2L11	AC110792.3	0.459093	4.91814e-26	postive		SCAF11	AC096708.2	0.632174	3.78731e-54	postive
ZEB1	AL049780.1	0.593721	2.16834e-46	postive		BCL2L12	AC110792.3	-0.328775	2.19422e-13	negative		SCAF11	AC099518.4	0.381678	7.50124e-18	postive
PRKAA2	DANT2	0.59362	2.26605e-46	postive		BCL2L1	AC093585.1	0.305128	1.19418e-11	postive		IL1B	AL357874.2	0.301862	2.01772e-11	postive
ZEB1	WDFY3-AS2	0.59362	2.26615e-46	postive		CASP10	AC130456.3	0.304774	1.26455e-11	postive		SCAF11	AL357874.2	0.573407	1.06964e-42	postive
MAP1LC3A	SNHG11	0.593572	2.31312e-46	postive		BCL2L1	AC005229.4	0.315762	2.06757e-12	postive		IL1B	MED8-AS1	0.421784	7.95204e-22	postive
ZEB1	ANKRD10-IT1	0.593161	2.76425e-46	postive		CSE1L	AC005229.4	0.399318	1.56056e-19	postive		SCAF11	MED8-AS1	0.482386	6.14592e-29	postive
ZEB1	AL513327.2	0.593101	2.83656e-46	postive		TNFRSF10A	AC005229.4	-0.301214	2.23744e-11	negative		SCAF11	FMR1-IT1	0.609043	2.35535e-49	postive
ZEB1	AC092802.4	0.593096	2.84294e-46	postive		BCL2A1	LINC00924	0.308118	7.3459e-12	postive		GSDMD	SNHG9	0.308916	6.44551e-12	postive
MAP1LC3A	MHENCR	0.592995	2.96919e-46	postive		BCL2L11	LINC00924	0.337163	4.87684e-14	postive		PYCARD	SNHG9	0.478349	2.03173e-28	postive
ZEB1	AC131953.2	0.592938	3.04422e-46	postive		BCL2L12	LINC00924	-0.307865	7.6554e-12	negative		SCAF11	SNHG9	-0.348573	5.85274e-15	negative
HELLS	AP003086.1	0.592906	3.08594e-46	postive		BAD	AL360219.2	-0.308664	6.718e-12	negative		IL1B	AC003991.1	0.647233	1.70635e-57	postive
HELLS	C2-AS1	0.592845	3.16841e-46	postive		BCL2A1	AL360219.2	0.361436	4.82211e-16	postive		SCAF11	AC003991.1	0.620845	9.46916e-52	postive
HELLS	NFYC-AS1	0.592667	3.4218e-46	postive		BCL2L11	AL360219.2	0.462588	1.86321e-26	postive		SCAF11	C3orf35	0.536407	1.35172e-36	postive
ZEB1	AC020612.3	0.592665	3.42559e-46	postive		BAD	GSTCD-AS1	-0.382701	6.03026e-18	negative		GSDMD	AC007390.1	-0.305483	1.12754e-11	negative
HELLS	AC010300.1	0.592545	3.60654e-46	postive		BCL2L11	GSTCD-AS1	0.487344	1.38478e-29	postive		IL1B	AC007390.1	0.399339	1.5532e-19	postive
HELLS	AL139021.2	0.592437	3.77887e-46	postive		BCL2L12	GSTCD-AS1	-0.349837	4.60208e-15	negative		SCAF11	AC007390.1	0.751386	4.48205e-87	postive
HELLS	AC125437.1	0.59234	3.94091e-46	postive		BCL2	AC087501.4	0.311322	4.33687e-12	postive		SCAF11	MIR17HG	0.679565	2.33113e-65	postive
HELLS	SNHG4	0.592266	4.06937e-46	postive		BCL2A1	AC087501.4	0.360675	5.60729e-16	postive		IL1B	LINC01772	0.332285	1.17597e-13	postive
HELLS	LRRC8C-DT	0.592151	4.27492e-46	postive		BCL2L1	AC087501.4	-0.32113	8.30402e-13	negative		SCAF11	LINC01772	0.500341	2.47557e-31	postive
ZEB1	EPN2-AS1	0.592148	4.28033e-46	postive		BCL2L11	AC087501.4	0.49496	1.3374e-30	postive		GSDMD	AC008669.1	-0.321876	7.30473e-13	negative
ZEB1	Z98884.2	0.591876	4.81362e-46	postive		FAS	AC087501.4	0.436053	2.24983e-23	postive		SCAF11	AC008669.1	0.623201	3.06011e-52	postive
ZEB1	FMR1-IT1	0.591806	4.96034e-46	postive		BCL2L12	DNMBP-AS1	-0.362078	4.24504e-16	negative		TNF	AC093627.6	0.308283	7.14994e-12	postive
ZEB1	AC002044.1	0.591783	5.00988e-46	postive		BCL2L11	AC092718.2	0.352733	2.64335e-15	postive		IL1B	AP002907.1	0.457487	7.65458e-26	postive
HELLS	RNF216-IT1	0.591764	5.0507e-46	postive		BCL2L1	AC022182.1	-0.303177	1.63498e-11	negative		SCAF11	AP002907.1	0.699393	1.05344e-70	postive
ZEB1	AP002993.1	0.591697	5.1997e-46	postive		BCL2L11	AC010327.5	0.319152	1.16461e-12	postive		IL1B	DLGAP4-AS1	0.316166	1.9315e-12	postive
ZEB1	AL442067.1	0.591679	5.23865e-46	postive		BAD	NEAT1	-0.359258	7.41853e-16	negative		SCAF11	DLGAP4-AS1	0.630163	1.02602e-53	postive
ZEB1	AL157838.1	0.591471	5.73126e-46	postive		BCL2A1	NEAT1	0.382282	6.59495e-18	postive		SCAF11	LINC00893	0.528632	2.08602e-35	postive
PTGS2	ATP2B1-AS1	0.591431	5.83015e-46	postive		BCL2L11	NEAT1	0.543991	8.74077e-38	postive		SCAF11	AC068790.2	0.666891	3.6999e-62	postive
HELLS	AC015727.1	0.591363	6.00238e-46	postive		BCL2L12	NEAT1	-0.331008	1.47692e-13	negative		PLCG1	AL121583.1	0.304721	1.27536e-11	postive
ZEB1	AC012181.1	0.59133	6.08934e-46	postive		BAD	AC010300.1	-0.348195	6.28672e-15	negative		SCAF11	AL121583.1	0.454739	1.6227e-25	postive
HELLS	AC027682.4	0.591224	6.37272e-46	postive		BCL2L11	AC010300.1	0.397939	2.13038e-19	postive		SCAF11	AL390728.6	0.554723	1.606e-39	postive
HELLS	Z99289.3	0.591151	6.57429e-46	postive		BCL2L12	AC010300.1	-0.330552	1.60174e-13	negative		NOD2	AL357033.4	0.313659	2.94125e-12	postive
ZEB1	AC004846.1	0.59114	6.60739e-46	postive		BAD	AL445223.1	-0.301648	2.08795e-11	negative		PLCG1	AL357033.4	0.413057	6.48351e-21	postive
ZEB1	LINC01772	0.591095	6.73442e-46	postive		BCL2L11	AL445223.1	0.383527	5.05369e-18	postive		IL1B	AC069549.1	0.635778	6.22916e-55	postive
ZEB1	AC026368.1	0.591083	6.7711e-46	postive		BCL2L11	AC012640.1	0.348968	5.42968e-15	postive		SCAF11	AC069549.1	0.59043	8.96023e-46	postive
HELLS	AC022960.1	0.590965	7.12323e-46	postive		BAD	AC026356.1	-0.383326	5.2757e-18	negative		IL1B	AC010542.6	0.404563	4.71499e-20	postive
PRKAA2	AC090948.2	0.590817	7.5898e-46	postive		BCL2L11	AC026356.1	0.525226	6.76683e-35	postive		SCAF11	AC010542.6	0.592602	3.51872e-46	postive
PTGS2	AL807757.2	0.590734	7.86575e-46	postive		BAD	NCOA7-AS1	-0.346025	9.46717e-15	negative		IL1B	AL020997.3	0.303164	1.63835e-11	postive
ZEB1	TBL1XR1-AS1	0.590705	7.96171e-46	postive		BCL2A1	NCOA7-AS1	0.42704	2.18135e-22	postive		SCAF11	AL020997.3	0.673745	7.19587e-64	postive
HELLS	AC008758.2	0.590701	7.97751e-46	postive		BCL2L11	NCOA7-AS1	0.513696	3.29529e-33	postive		SCAF11	LINC00630	0.708557	2.51522e-73	postive
ZEB1	AC087521.2	0.590495	8.71496e-46	postive		BCL2L12	NCOA7-AS1	-0.31564	2.11058e-12	negative		SCAF11	SEPSECS-AS1	0.543258	1.1424e-37	postive
HELLS	AC009118.3	0.590484	8.75404e-46	postive		BCL2A1	MEIS1-AS2	0.445117	2.1365e-24	postive		SCAF11	AC104695.2	0.30503	1.21332e-11	postive
ZEB1	AL136115.1	0.590477	8.7796e-46	postive		BCL2L11	MEIS1-AS2	0.448774	8.09795e-25	postive		SCAF11	AD001527.1	0.524461	8.79791e-35	postive
PRKAA2	MIR100HG	0.590459	8.8485e-46	postive		BAD	AC091057.1	-0.36038	5.94429e-16	negative		SCAF11	AC004918.1	0.365516	2.1329e-16	postive
ZEB1	AL109614.1	0.590436	8.9377e-46	postive		BCL2L11	AC091057.1	0.385436	3.35221e-18	postive		IL1B	AL450998.3	0.473459	8.46532e-28	postive
ZEB1	AC244093.5	0.590397	9.08812e-46	postive		BCL2L2	AC091057.1	0.395597	3.60203e-19	postive		SCAF11	AL450998.3	0.58041	6.09818e-44	postive
ZEB1	AL355312.2	0.590086	1.03809e-45	postive		BCL2L11	AC093732.1	0.512877	4.31879e-33	postive		IL1B	AC016405.1	0.408921	1.71576e-20	postive
ZEB1	AC022973.5	0.590037	1.06008e-45	postive		BMF	NKILA	0.334208	8.32738e-14	postive		SCAF11	AC016405.1	0.678621	4.08738e-65	postive
HELLS	AL157838.1	0.59	1.07715e-45	postive		BAD	AL078587.1	-0.365646	2.07773e-16	negative		SCAF11	AC073288.2	0.440799	6.61659e-24	postive
PTGS2	AC087893.3	0.589943	1.10393e-45	postive		BCL2L11	AL078587.1	0.389504	1.38507e-18	postive		IL1B	AC108463.2	0.518097	7.60978e-34	postive
ZEB1	AC092828.1	0.589411	1.38557e-45	postive		BCL2L11	AC127502.2	0.412232	7.88093e-21	postive		SCAF11	AC108463.2	0.621513	6.87881e-52	postive
ZEB1	AC112496.1	0.589407	1.38809e-45	postive		BAD	AC004241.4	-0.335545	6.54242e-14	negative		SCAF11	AC008429.1	0.41552	3.60821e-21	postive
ZEB1	RNASEH2B-AS1	0.589394	1.39573e-45	postive		BCL2L11	AC004241.4	0.341497	2.20226e-14	postive		SCAF11	AC019257.2	0.38533	3.4296e-18	postive
ZEB1	AL035071.2	0.589161	1.54173e-45	postive		BCL2L12	AC004241.4	-0.33419	8.35465e-14	negative		SCAF11	UBE2Q1-AS1	0.476756	3.24275e-28	postive
ZEB1	AC073326.1	0.58916	1.54218e-45	postive		BAD	AC087854.1	-0.356234	1.34153e-15	negative		IL1B	ZNF346-IT1	0.41047	1.19354e-20	postive
ZEB1	AC009032.1	0.589056	1.61225e-45	postive		BCL2L11	AC087854.1	0.473629	8.05953e-28	postive		SCAF11	ZNF346-IT1	0.698949	1.4029e-70	postive
HELLS	AC007431.2	0.589007	1.64628e-45	postive		BCL2L12	AC087854.1	-0.350703	3.90125e-15	negative		SCAF11	AC004839.2	0.405849	3.50432e-20	postive
HELLS	LINC02042	0.58896	1.67981e-45	postive		BAD	SYNJ2-IT1	-0.327569	2.71343e-13	negative		SCAF11	C21orf62-AS1	0.374628	3.30622e-17	postive
ZEB1	AP000487.1	0.588956	1.68242e-45	postive		BCL2L11	SYNJ2-IT1	0.483414	4.52175e-29	postive		IL1B	AC012447.1	0.514373	2.63379e-33	postive
ZEB1	AL450998.3	0.588941	1.69339e-45	postive		BCL2L12	SYNJ2-IT1	-0.308802	6.56788e-12	negative		SCAF11	AC012447.1	0.680969	1.00716e-65	postive
HELLS	AC018926.2	0.588906	1.71845e-45	postive		BID	AC138207.2	0.337439	4.63826e-14	postive		IL1B	AC009690.2	0.45626	1.07159e-25	postive
ZEB1	AL031666.1	0.588855	1.75647e-45	postive		RIPK1	AC138207.2	-0.330764	1.54254e-13	negative		SCAF11	AC009690.2	0.546287	3.76212e-38	postive
LOX	AC011352.3	0.588823	1.78074e-45	postive		BAD	AL049780.1	-0.342501	1.82843e-14	negative		SCAF11	AC132938.3	0.371288	6.59297e-17	postive
HELLS	RAP2C-AS1	0.588482	2.05859e-45	postive		BCL2L11	AL049780.1	0.523249	1.33134e-34	postive		SCAF11	AL049870.3	0.499177	3.57446e-31	postive
ZEB1	AL022157.1	0.588365	2.1644e-45	postive		BCL2L2	AL049780.1	0.367762	1.3547e-16	postive		IL1B	AC079915.1	0.376962	2.03162e-17	postive
PTGS2	HMGA2-AS1	0.588297	2.22748e-45	postive		BAK1	TMCC1-AS1	-0.362354	4.01782e-16	negative		SCAF11	AC079915.1	0.69341	4.79874e-69	postive
HELLS	PHC2-AS1	0.588182	2.33966e-45	postive		BAD	AC131971.1	-0.386902	2.44112e-18	negative		IL1B	AC005104.1	0.448561	8.57219e-25	postive
ZEB1	AC012020.1	0.588143	2.37805e-45	postive		BCL2A1	AC131971.1	0.300464	2.52066e-11	postive		SCAF11	AC005104.1	0.649307	5.70564e-58	postive
ZEB1	AC242426.2	0.588122	2.4001e-45	postive		BCL2L11	AC131971.1	0.519913	4.13049e-34	postive		SCAF11	AC004943.2	0.340221	2.78685e-14	postive
HELLS	GRPEL2-AS1	0.588	2.52751e-45	postive		BCL2L12	AC131971.1	-0.360764	5.50985e-16	negative		SCAF11	ZNF571-AS1	0.663593	2.37388e-61	postive
PTGS2	AC007728.3	0.587879	2.66079e-45	postive		BCL2L11	AC005332.6	0.440873	6.4897e-24	postive		PLCG1	AC087289.2	0.320361	9.47444e-13	postive
PTGS2	ARAP1-AS2	0.587706	2.86398e-45	postive		BCL2L12	AC005332.6	-0.394964	4.14829e-19	negative		SCAF11	AC067747.1	0.523269	1.32246e-34	postive
PTGS2	MIR223HG	0.587649	2.93367e-45	postive		BCL2L2	AC005332.6	0.36159	4.67705e-16	postive		SCAF11	LINC00513	0.501055	1.97437e-31	postive
LOX	AC138207.5	0.587633	2.95412e-45	postive		BID	AC005332.6	-0.320689	8.95604e-13	negative		IL1B	AC132192.1	0.383614	4.96043e-18	postive
HELLS	AC012020.1	0.587626	2.96248e-45	postive		BAD	AC009148.1	-0.310282	5.14917e-12	negative		SCAF11	AC132192.1	0.716698	9.64039e-76	postive
ZEB1	AC024075.1	0.587594	3.0034e-45	postive		BCL2L11	AC009148.1	0.438618	1.1637e-23	postive		IL1B	LINC02550	0.303482	1.55672e-11	postive
HELLS	AC096642.1	0.587557	3.05034e-45	postive		BCL2L12	AC009148.1	-0.322931	6.08925e-13	negative		IL1B	KLF7-IT1	0.506731	3.20977e-32	postive
HELLS	AC006111.2	0.587421	3.23222e-45	postive		BCL2A1	AC107308.1	0.366578	1.72177e-16	postive		SCAF11	KLF7-IT1	0.688927	7.89738e-68	postive
ZEB1	AC107068.1	0.587407	3.25095e-45	postive		BCL2L11	AC107308.1	0.346562	8.55825e-15	postive		IL1B	AL035530.2	0.716914	8.29557e-76	postive
HELLS	AC115102.1	0.58737	3.30195e-45	postive		BCL2L2	ZNF582-AS1	0.302262	1.89298e-11	postive		SCAF11	AL035530.2	0.635891	5.88281e-55	postive
ZEB1	AC092953.2	0.587353	3.32593e-45	postive		BMF	ZNF582-AS1	0.352738	2.64074e-15	postive		IL1B	AC009054.1	0.322738	6.29614e-13	postive
PTGS2	AC022778.1	0.586883	4.05911e-45	postive		BAD	LINC01572	-0.357873	9.73914e-16	negative		SCAF11	AC009054.1	0.52079	3.07126e-34	postive
HELLS	SP2-AS1	0.586518	4.73708e-45	postive		BCL2L11	LINC01572	0.437413	1.58737e-23	postive		SCAF11	LINC00562	0.420038	1.21615e-21	postive
HELLS	C1RL-AS1	0.586264	5.27469e-45	postive		BCL2L12	LINC01572	-0.339947	2.93086e-14	negative		SCAF11	AC012442.2	0.433549	4.25763e-23	postive
ZEB1	PCBP1-AS1	0.586263	5.27516e-45	postive		TNFRSF1A	LINC01572	-0.314006	2.77574e-12	negative		IL1B	SOCAR	0.520625	3.24671e-34	postive
ZEB1	AC007216.4	0.586243	5.32112e-45	postive		BAD	AC006064.2	-0.402407	7.73137e-20	negative		SCAF11	SOCAR	0.479083	1.63697e-28	postive
ZEB1	AC087392.2	0.58619	5.44141e-45	postive		BCL2A1	AC006064.2	0.312043	3.84841e-12	postive		SCAF11	AC007608.2	0.450563	5.01752e-25	postive
PRKAA2	AC011773.1	0.586171	5.48529e-45	postive		BCL2L11	AC006064.2	0.515308	1.93094e-33	postive		IL1B	AC114763.1	0.412122	8.08881e-21	postive
HELLS	AC016722.2	0.585978	5.95192e-45	postive		BCL2L12	AC006064.2	-0.368159	1.24966e-16	negative		SCAF11	AC114763.1	0.604281	2.04413e-48	postive
ZEB1	ATP1B3-AS1	0.585941	6.04567e-45	postive		BAD	AL020997.2	-0.364684	2.52166e-16	negative		SCAF11	AC005519.1	0.540194	3.4731e-37	postive
PTGS2	AC130371.1	0.585756	6.5361e-45	postive		BCL2A1	AL020997.2	0.318592	1.28115e-12	postive		NOD2	AL121832.3	0.349014	5.38253e-15	postive
HELLS	AC005838.3	0.585732	6.60103e-45	postive		BCL2L11	AL020997.2	0.500741	2.18102e-31	postive		PLCG1	AL121832.3	0.536689	1.22266e-36	postive
HELLS	GARS1-DT	0.585443	7.45522e-45	postive		BCL2L12	AL020997.2	-0.344251	1.31999e-14	negative		SCAF11	AL096701.3	0.557976	4.646e-40	postive
ZEB1	AP002812.5	0.585422	7.52134e-45	postive		BCL2A1	SIDT1-AS1	0.368823	1.09168e-16	postive		PLCG1	AC055717.2	0.445715	1.82447e-24	postive
ZEB1	AC009090.3	0.585316	7.86556e-45	postive		BCL2L11	SIDT1-AS1	0.382929	5.74395e-18	postive		SCAF11	AC113361.1	0.481914	7.07557e-29	postive
LOX	ZNF667-AS1	0.585258	8.06181e-45	postive		BAD	AC109597.2	-0.344556	1.24688e-14	negative		GSDMD	LINC02035	-0.31111	4.49142e-12	negative
ZEB1	AC008115.3	0.584981	9.05574e-45	postive		BCL2A1	AC109597.2	0.316803	1.73487e-12	postive		SCAF11	LINC02035	0.563863	4.75358e-41	postive
HELLS	AC108463.3	0.584922	9.28553e-45	postive		BCL2L11	AC109597.2	0.533449	3.86103e-36	postive		IL1B	AC007216.4	0.390026	1.23547e-18	postive
ZEB1	AL731566.2	0.584806	9.74757e-45	postive		BCL2L12	AC109597.2	-0.324654	4.51735e-13	negative		SCAF11	AC007216.4	0.679813	2.01012e-65	postive
ZEB1	AL139397.1	0.584801	9.77054e-45	postive		BAD	AC084824.6	-0.328386	2.35019e-13	negative		NOD2	ATXN1-AS1	0.326041	3.54693e-13	postive
HELLS	AC004908.1	0.584681	1.02752e-44	postive		BCL2L11	AC084824.6	0.426079	2.76809e-22	postive		PLCG1	ATXN1-AS1	0.456582	9.81101e-26	postive
ZEB1	ACBD3-AS1	0.584517	1.10068e-44	postive		BCL2L12	AC084824.6	-0.300786	2.39506e-11	negative		GSDMD	JPX	-0.306018	1.0339e-11	negative
HELLS	AC007663.4	0.584377	1.16741e-44	postive		BCL2L11	AC080188.1	0.437153	1.69696e-23	postive		SCAF11	JPX	0.540282	3.36484e-37	postive
HELLS	AL162724.2	0.58437	1.17096e-44	postive		BCL2	SAP30-DT	0.306763	9.1617e-12	postive		SCAF11	AP001628.1	0.335998	6.02703e-14	postive
HELLS	Z99289.2	0.584112	1.30464e-44	postive		BCL2L11	SAP30-DT	0.390401	1.13802e-18	postive		SCAF11	AC008870.3	0.371625	6.15226e-17	postive
ZEB1	AC108063.1	0.583948	1.3976e-44	postive		BCL2L2	SAP30-DT	0.300154	2.64772e-11	postive		IL1B	AC089999.4	0.309402	5.95188e-12	postive
ZEB1	AC010524.1	0.583629	1.59694e-44	postive		BMF	ST20-AS1	0.353056	2.48366e-15	postive		SCAF11	AC089999.4	0.476055	3.98066e-28	postive
ZEB1	AL033397.2	0.583495	1.68902e-44	postive		BAD	CRYZL2P-SEC16B	-0.326898	3.05284e-13	negative		IL1B	AL359962.2	0.522801	1.55099e-34	postive
HELLS	AC093227.1	0.583387	1.76746e-44	postive		BCL2L11	CRYZL2P-SEC16B	0.368629	1.13577e-16	postive		SCAF11	AL359962.2	0.550015	9.43924e-39	postive
HELLS	AL138921.1	0.583342	1.80077e-44	postive		BCL2L12	CRYZL2P-SEC16B	-0.310084	5.31997e-12	negative		IL1B	AC096741.1	0.312956	3.30665e-12	postive
HELLS	AC106037.3	0.583299	1.83376e-44	postive		BCL2L2	CRYZL2P-SEC16B	0.307191	8.54446e-12	postive		SCAF11	AC096741.1	0.685182	7.88525e-67	postive
ZEB1	AC022306.3	0.583226	1.89034e-44	postive		BCL2	AC019205.1	0.333218	9.95031e-14	postive		IL1B	AC016722.2	0.363687	3.07914e-16	postive
PRKAA2	AL139147.1	0.583131	1.96691e-44	postive		BCL2A1	AC019205.1	0.30699	8.82928e-12	postive		SCAF11	AC016722.2	0.589513	1.32662e-45	postive
ZEB1	INO80-AS1	0.583091	2e-44	postive		BCL2L11	AC019205.1	0.46909	2.97204e-27	postive		IL1B	MIR100HG	0.51652	1.28978e-33	postive
PRKAA2	SCARNA9	0.58308	2.00898e-44	postive		BAD	AC012213.3	-0.340468	2.6626e-14	negative		SCAF11	MIR100HG	0.506632	3.31386e-32	postive
HELLS	AP000692.1	0.583022	2.05842e-44	postive		BCL2L11	AC012213.3	0.413296	6.12611e-21	postive		IL1B	AC008760.2	0.402492	7.58182e-20	postive
PTGS2	LINC01914	0.582921	2.14773e-44	postive		BCL2L12	AC012213.3	-0.311647	4.11001e-12	negative		SCAF11	AC008760.2	0.344413	1.28065e-14	postive
ZEB1	AC006160.1	0.582858	2.20435e-44	postive		BAD	AC084824.5	-0.370487	7.77088e-17	negative		SCAF11	AP000442.1	0.305279	1.16538e-11	postive
ZEB1	GLYCTK-AS1	0.582829	2.2314e-44	postive		BCL2L11	AC084824.5	0.422771	6.2483e-22	postive		SCAF11	RNF139-AS1	0.572454	1.57076e-42	postive
HELLS	AC027097.2	0.582653	2.401e-44	postive		BCL2L12	AC084824.5	-0.345368	1.07113e-14	negative		PLCG1	GAS6-AS1	0.327982	2.5237e-13	postive
HELLS	AC145423.3	0.582599	2.45614e-44	postive		TNFRSF1A	AC084824.5	-0.306205	1.00302e-11	negative		SCAF11	AC073323.1	0.378311	1.53025e-17	postive
ZEB1	AC003991.1	0.582312	2.7684e-44	postive		BCL2L12	AC011477.2	-0.349873	4.57074e-15	negative		SCAF11	DANT2	0.391683	8.58451e-19	postive
PTGS2	LINC01050	0.582235	2.85853e-44	postive		TNFRSF1A	AC011477.2	-0.36661	1.71047e-16	negative		IL1B	LINC02595	0.337723	4.40393e-14	postive
PTGS2	AC079209.2	0.582102	3.02094e-44	postive		BAD	AC019080.1	-0.418665	1.69553e-21	negative		SCAF11	LINC02595	0.629414	1.48464e-53	postive
HELLS	AC211476.4	0.582016	3.13202e-44	postive		BCL2L11	AC019080.1	0.522294	1.84349e-34	postive		IL1B	AC004637.1	0.415612	3.52931e-21	postive
HELLS	AC013468.1	0.581976	3.18397e-44	postive		BCL2L12	AC019080.1	-0.423125	5.72892e-22	negative		SCAF11	AC004637.1	0.553621	2.43772e-39	postive
HELLS	AC006504.1	0.581937	3.23635e-44	postive		BCL2L2	AC019080.1	0.313361	3.09119e-12	postive		IL1B	AC026202.2	0.481285	8.52856e-29	postive
HELLS	MPRIP-AS1	0.581898	3.28913e-44	postive		TNFRSF1A	AC019080.1	-0.301595	2.10571e-11	negative		SCAF11	AC026202.2	0.660455	1.36108e-60	postive
PRKAA2	ZBED3-AS1	0.581829	3.3853e-44	postive		BAD	ZKSCAN2-DT	-0.323535	5.4857e-13	negative		GSDMD	AC090948.2	-0.302649	1.77939e-11	negative
ZEB1	ODF2-AS1	0.581784	3.44871e-44	postive		BCL2L11	ZKSCAN2-DT	0.386663	2.57082e-18	postive		IL1B	AC090948.2	0.396476	2.95914e-19	postive
ZEB1	AC011978.2	0.581735	3.51986e-44	postive		BMF	AL118506.1	0.302144	1.92907e-11	postive		SCAF11	AC090948.2	0.632955	2.56621e-54	postive
ZEB1	ANKRD44-AS1	0.581719	3.54359e-44	postive		BAD	SCAT2	-0.377724	1.73148e-17	negative		SCAF11	AP4B1-AS1	0.658106	4.96461e-60	postive
ZEB1	AC022893.1	0.581481	3.91134e-44	postive		BCL2A1	SCAT2	0.307332	8.35166e-12	postive		IL1B	AC092755.1	0.516226	1.42241e-33	postive
HELLS	AL022157.1	0.581469	3.93195e-44	postive		BCL2L11	SCAT2	0.49476	1.42319e-30	postive		SCAF11	AC092755.1	0.658678	3.62716e-60	postive
HELLS	MIR4453HG	0.58143	3.99552e-44	postive		TNFRSF1A	SCAT2	-0.311541	4.18266e-12	negative		IL1B	RDH10-AS1	0.524271	9.38833e-35	postive
CRYAB	AP001189.3	0.581167	4.45742e-44	postive		BAD	Z83843.1	-0.332472	1.13743e-13	negative		SCAF11	RDH10-AS1	0.642511	2.00208e-56	postive
HELLS	AC068491.3	0.581163	4.46471e-44	postive		BCL2L11	Z83843.1	0.369353	9.79876e-17	postive		SCAF11	AC026367.2	0.376526	2.22561e-17	postive
HELLS	MRPS9-AS1	0.581134	4.51754e-44	postive		BCL2L12	Z83843.1	-0.300873	2.36214e-11	negative		SCAF11	AC008456.1	0.624296	1.80384e-52	postive
ZEB1	AC104109.4	0.581092	4.59743e-44	postive		BAD	AC004832.4	-0.360253	6.0962e-16	negative		PLCG1	AC232271.1	0.375733	2.62684e-17	postive
HELLS	IGBP1-AS2	0.58106	4.65819e-44	postive		BCL2A1	AC004832.4	0.307098	8.67601e-12	postive		SCAF11	AC232271.1	0.379466	1.19944e-17	postive
PTGS2	AL645568.1	0.580955	4.86534e-44	postive		BCL2L11	AC004832.4	0.517796	8.41884e-34	postive		GSDMD	AF127577.4	-0.33273	1.08601e-13	negative
ZEB1	AC007639.1	0.580893	4.99329e-44	postive		BCL2L12	AC004832.4	-0.344559	1.24619e-14	negative		PYCARD	AF127577.4	-0.325387	3.97615e-13	negative
HELLS	UBE2R2-AS1	0.580788	5.21621e-44	postive		CSE1L	BOLA3-AS1	0.302302	1.88101e-11	postive		SCAF11	AF127577.4	0.667889	2.09911e-62	postive
HELLS	AL122035.1	0.580676	5.46282e-44	postive		BCL2L11	AC064836.1	0.359604	6.92965e-16	postive		PLCG1	C1orf220	0.330683	1.56483e-13	postive
HELLS	AC008870.4	0.580486	5.90949e-44	postive		BAD	AL031667.3	-0.351081	3.62901e-15	negative		SCAF11	C1orf220	0.413607	5.69014e-21	postive
ZEB1	AC245884.10	0.580474	5.94057e-44	postive		BCL2L11	AL031667.3	0.444688	2.39227e-24	postive		GSDMD	AL513534.3	-0.300814	2.38438e-11	negative
HELLS	LINC00412	0.580324	6.31895e-44	postive		BCL2L12	AL031667.3	-0.317797	1.46637e-12	negative		SCAF11	AL513534.3	0.530414	1.12139e-35	postive
ZEB1	ERCC8-AS1	0.58023	6.57105e-44	postive		BCL2L1	GAS6-DT	0.310226	5.19689e-12	postive		SCAF11	AL033384.2	0.41977	1.29784e-21	postive
ZEB1	FAM53B-AS1	0.579869	7.6287e-44	postive		BCL2L11	GAS6-DT	0.322924	6.09744e-13	postive		IL1B	Z82217.1	0.44349	3.27709e-24	postive
ZEB1	OIP5-AS1	0.579782	7.90911e-44	postive		BAD	AL080317.2	-0.379747	1.13011e-17	negative		SCAF11	Z82217.1	0.697022	4.83874e-70	postive
ZEB1	AC019205.1	0.579768	7.95216e-44	postive		BCL2L11	AL080317.2	0.464201	1.18606e-26	postive		GSDMD	AC040169.1	0.386735	2.53131e-18	postive
PTGS2	MRTFA-AS1	0.579683	8.23859e-44	postive		BCL2L12	AL080317.2	-0.353203	2.41424e-15	negative		PYCARD	AC040169.1	0.399352	1.54848e-19	postive
ZEB1	Z93022.1	0.57963	8.41943e-44	postive		TNFRSF1A	AL080317.2	-0.307203	8.52862e-12	negative		SCAF11	AC040169.1	-0.360497	5.80798e-16	negative
ZEB1	AC040934.1	0.579618	8.46089e-44	postive		BID	AC004231.1	0.311318	4.34018e-12	postive		IL1B	AC058791.1	0.308355	7.06619e-12	postive
HELLS	ARHGEF38-IT1	0.579543	8.72875e-44	postive		BAD	AC068620.2	-0.332223	1.18913e-13	negative		SCAF11	AC058791.1	0.697028	4.82064e-70	postive
HELLS	FLNB-AS1	0.57944	9.10674e-44	postive		BCL2L11	AC068620.2	0.375292	2.87978e-17	postive		SCAF11	ZRANB2-AS1	0.714378	4.803e-75	postive
LOX	AC004988.1	0.579437	9.11833e-44	postive		BCL2L12	AC068620.2	-0.323889	5.15888e-13	negative		SCAF11	AC139795.2	0.430073	1.02328e-22	postive
ZEB1	RHOA-IT1	0.579412	9.21434e-44	postive		TNFRSF1A	AC068620.2	-0.311374	4.29994e-12	negative		GSDMD	NORAD	-0.335267	6.8789e-14	negative
ZEB1	AC016831.1	0.579404	9.24364e-44	postive		BCL2	LINC01094	0.303337	1.59348e-11	postive		NOD2	NORAD	0.407068	2.64153e-20	postive
ZEB1	GSN-AS1	0.579315	9.59023e-44	postive		BCL2A1	LINC01094	0.771928	1.02832e-94	postive		PLCG1	NORAD	0.519567	4.64183e-34	postive
ZEB1	LINC01914	0.579236	9.90543e-44	postive		BCL2L11	LINC01094	0.445796	1.78607e-24	postive		SCAF11	NORAD	0.504765	6.04429e-32	postive
PRKAA2	AC105429.1	0.579213	1.00017e-43	postive		BCL2L12	LINC01094	-0.336679	5.32597e-14	negative		IL1B	AC135050.4	0.374208	3.60781e-17	postive
PRKAA2	MAGI2-AS3	0.579106	1.04526e-43	postive		FAS	LINC01094	0.42972	1.11794e-22	postive		SCAF11	AC135050.4	0.459082	4.93367e-26	postive
ZEB1	LINC01473	0.579035	1.07638e-43	postive		BCL2L11	AC008764.8	0.414617	4.47535e-21	postive		SCAF11	AL158837.1	0.506939	3.00121e-32	postive
ZEB1	AC073487.1	0.579028	1.0794e-43	postive		BCL2L11	AL022322.1	0.452486	2.98877e-25	postive		SCAF11	AGAP1-IT1	0.445157	2.11391e-24	postive
HELLS	AC008669.1	0.578748	1.21108e-43	postive		BCL2L12	AL022322.1	-0.304374	1.34881e-11	negative		IL1B	ATP2B1-AS1	0.559867	2.24489e-40	postive
PTGS2	AL365361.1	0.578699	1.23561e-43	postive		BAD	SNHG4	-0.330158	1.71774e-13	negative		SCAF11	ATP2B1-AS1	0.450627	4.93202e-25	postive
ZEB1	MAL2-AS1	0.578699	1.23593e-43	postive		TNFRSF1A	SNHG4	-0.390894	1.02116e-18	negative		SCAF11	CASC19	0.556708	7.54784e-40	postive
ZEB1	AL022311.1	0.578479	1.35269e-43	postive		BCL2L1	AL133520.1	0.335463	6.6398e-14	postive		IL1B	AC006042.3	0.479587	1.41054e-28	postive
ZEB1	AC008906.1	0.578311	1.44938e-43	postive		CSE1L	AL133520.1	0.495452	1.14767e-30	postive		SCAF11	AC006042.3	0.611637	7.14573e-50	postive
PTGS2	AC125437.1	0.578302	1.45517e-43	postive		BAD	AC092168.2	-0.367502	1.42809e-16	negative		SCAF11	AC018552.3	0.537501	9.14702e-37	postive
HELLS	AC011676.3	0.578218	1.50602e-43	postive		BCL2L11	AC092168.2	0.509628	1.25318e-32	postive		GSDMD	AL021707.6	0.363576	3.14833e-16	postive
HELLS	AL139011.1	0.578146	1.55146e-43	postive		BCL2L12	AC092168.2	-0.346899	8.03214e-15	negative		SCAF11	AP006333.3	0.530501	1.08777e-35	postive
ZEB1	AC113139.1	0.578024	1.63086e-43	postive		BCL2A1	LINC01655	0.3593	7.35688e-16	postive		IL1B	MRPS30-DT	0.319979	1.01132e-12	postive
ZEB1	AC007663.4	0.57796	1.67411e-43	postive		BCL2L11	LINC01655	0.494351	1.6161e-30	postive		SCAF11	MRPS30-DT	0.65322	7.05555e-59	postive
HELLS	AC009120.2	0.577936	1.6908e-43	postive		BCL2L11	AC024361.1	0.488418	9.99375e-30	postive		IL1B	ITFG1-AS1	0.407053	2.65081e-20	postive
ZEB1	AC022165.1	0.577927	1.69762e-43	postive		BCL2L12	AC024361.1	-0.303305	1.60179e-11	negative		SCAF11	ITFG1-AS1	0.665704	7.24456e-62	postive
HELLS	AC013403.2	0.577906	1.71206e-43	postive		BCL2L2	AC024361.1	0.319645	1.07079e-12	postive		PLCG1	AC092171.3	0.333426	9.5861e-14	postive
ZEB1	MIR181A2HG	0.577845	1.75557e-43	postive		BAD	AL133243.2	-0.39407	5.0613e-19	negative		IL1B	AC211433.1	0.42737	2.00946e-22	postive
ZEB1	AC005180.1	0.577785	1.79919e-43	postive		BCL2L11	AL133243.2	0.487981	1.14143e-29	postive		SCAF11	AC211433.1	0.708673	2.32625e-73	postive
LOX	LINC00987	0.577737	1.83456e-43	postive		BCL2L12	AL133243.2	-0.365714	2.04959e-16	negative		SCAF11	AL391095.2	0.349596	4.8181e-15	postive
HELLS	GABPB1-AS1	0.577616	1.9279e-43	postive		CASP7	LINC01752	0.348208	6.27152e-15	postive		IL1B	AC011472.4	0.383261	5.3498e-18	postive
HELLS	AC092127.1	0.577603	1.93867e-43	postive		BAD	AL157400.4	-0.342499	1.82891e-14	negative		SCAF11	AC011472.4	0.661416	7.99143e-61	postive
PRKAA2	AL591848.4	0.577511	2.01326e-43	postive		BCL2L11	AL157400.4	0.436348	2.08615e-23	postive		IL1B	AC092718.5	0.43594	2.31573e-23	postive
ZEB1	AC245060.5	0.57751	2.01404e-43	postive		BCL2L12	AL157400.4	-0.341816	2.07609e-14	negative		SCAF11	AC092718.5	0.588013	2.514e-45	postive
ZEB1	AL442128.2	0.577454	2.06094e-43	postive		BCL2L2	AL157400.4	0.31139	4.28818e-12	postive		IL1B	AL020995.1	0.393629	5.5815e-19	postive
ATG7	LINC01943	0.577392	2.11397e-43	postive		BCL2L11	UBE2D3-AS1	0.340838	2.48693e-14	postive		SCAF11	AL020995.1	0.700293	5.88265e-71	postive
ZEB1	AC010149.1	0.577385	2.12008e-43	postive		BCL2	LINC00582	0.307474	8.15988e-12	postive		SCAF11	MRPS9-AS1	0.539314	4.77047e-37	postive
ZEB1	AC002558.2	0.577329	2.16888e-43	postive		BCL2L11	LINC00582	0.466823	5.66141e-27	postive		IL1B	RNF144A-AS1	0.471917	1.3214e-27	postive
ZEB1	MESTIT1	0.577278	2.21471e-43	postive		BCL2L12	AC009495.1	-0.304122	1.40459e-11	negative		SCAF11	RNF144A-AS1	0.418765	1.65486e-21	postive
HELLS	AL445309.1	0.577254	2.23647e-43	postive		CSE1L	SNHG15	0.303892	1.45756e-11	postive		SCAF11	AL391427.1	0.398018	2.09292e-19	postive
ZEB1	FOCAD-AS1	0.577165	2.31915e-43	postive		FAS	LINC02604	-0.315089	2.31515e-12	negative		SCAF11	AC129507.1	0.361838	4.45197e-16	postive
ZEB1	AC008957.1	0.576825	2.6655e-43	postive		BAD	UCKL1-AS1	-0.320526	9.20947e-13	negative		GSDMD	EBLN3P	-0.382	7.00375e-18	negative
ZEB1	AC007728.3	0.576781	2.71425e-43	postive		BAD	AC024075.3	-0.42323	5.58332e-22	negative		PYCARD	EBLN3P	-0.309458	5.89714e-12	negative
PTGS2	AL391832.3	0.576754	2.74418e-43	postive		BCL2L11	AC024075.3	0.51275	4.50334e-33	postive		SCAF11	EBLN3P	0.711762	2.87866e-74	postive
ZEB1	AC091185.1	0.576752	2.74623e-43	postive		BCL2L12	AC024075.3	-0.361995	4.31571e-16	negative		SCAF11	AC106791.1	0.463938	1.27695e-26	postive
HELLS	AC005540.1	0.576605	2.91699e-43	postive		BAD	LINC01762	-0.331088	1.45599e-13	negative		IL1B	AC010536.2	0.453459	2.29738e-25	postive
ZEB1	LINC00626	0.576384	3.19175e-43	postive		BCL2L11	LINC01762	0.365264	2.24402e-16	postive		SCAF11	AC010536.2	0.550769	7.12294e-39	postive
PTGS2	AC025857.2	0.576381	3.19626e-43	postive		BCL2L12	LINC01762	-0.323664	5.36457e-13	negative		TNF	SMIM25	0.466434	6.32044e-27	postive
LOX	AC090825.1	0.576253	3.36773e-43	postive		BAD	AC138956.1	-0.359688	6.81458e-16	negative		IL1B	AC091906.1	0.301651	2.08693e-11	postive
HELLS	AP002026.1	0.57615	3.51177e-43	postive		BCL2L11	AC138956.1	0.514002	2.97801e-33	postive		SCAF11	AC091906.1	0.577352	2.14878e-43	postive
ZEB1	AC005332.7	0.576072	3.62556e-43	postive		BCL2L12	AC138956.1	-0.357583	1.03068e-15	negative		GSDMD	AC019080.5	-0.311377	4.29775e-12	negative
PTGS2	AL136115.1	0.575964	3.78873e-43	postive		BAD	CSNK1G2-AS1	-0.337167	4.87327e-14	negative		SCAF11	AC019080.5	0.674007	6.17891e-64	postive
ZEB1	ALMS1-IT1	0.57594	3.82624e-43	postive		BCL2L11	CSNK1G2-AS1	0.508517	1.7992e-32	postive		IL1B	ACSL3-AS1	0.426769	2.33271e-22	postive
HELLS	AC118344.1	0.575916	3.86265e-43	postive		BCL2L12	CSNK1G2-AS1	-0.311603	4.13971e-12	negative		SCAF11	ACSL3-AS1	0.745034	7.30782e-85	postive
HELLS	LINC01811	0.575835	3.99366e-43	postive		BAD	AC015911.3	-0.342763	1.74154e-14	negative		SCAF11	AL442128.2	0.573022	1.24941e-42	postive
PTGS2	LAMC1-AS1	0.575717	4.18987e-43	postive		BCL2	AC015911.3	0.385854	3.06294e-18	postive		IL1B	AC107993.1	0.485585	2.356e-29	postive
LOX	AL136084.3	0.575507	4.56413e-43	postive		BCL2A1	AC015911.3	0.339865	2.97545e-14	postive		SCAF11	AC107993.1	0.633474	1.9798e-54	postive
HELLS	AP006333.3	0.575476	4.62182e-43	postive		BCL2L11	AC015911.3	0.607739	4.27176e-49	postive		CASP6	AC002091.1	-0.308835	6.53225e-12	negative
HELLS	AP003392.1	0.575475	4.62282e-43	postive		BCL2L12	AC015911.3	-0.334483	7.92508e-14	negative		IL1B	AC002091.1	0.480802	9.8444e-29	postive
HELLS	VAC14-AS1	0.575442	4.68565e-43	postive		FAS	AC015911.3	0.377912	1.66442e-17	postive		TNF	AC002091.1	0.439392	9.52769e-24	postive
HELLS	MIR3150BHG	0.575216	5.13639e-43	postive		BAD	AL391834.1	-0.337611	4.49478e-14	negative		SCAF11	HCG14	0.313427	3.05732e-12	postive
ZEB1	AC067747.1	0.575137	5.30494e-43	postive		BCL2L11	AL391834.1	0.420203	1.16822e-21	postive		SCAF11	AL161891.1	0.614124	2.25458e-50	postive
HELLS	AC008121.3	0.575124	5.33203e-43	postive		BCL2L12	AL391834.1	-0.349207	5.18883e-15	negative		SCAF11	AC012313.9	0.334699	7.62293e-14	postive
HELLS	AC114781.2	0.575064	5.46477e-43	postive		TNFRSF1A	AL391834.1	-0.316344	1.87462e-12	negative		SCAF11	AC006017.1	0.665978	6.20637e-62	postive
ZEB1	AC025171.4	0.575006	5.59456e-43	postive		BCL2A1	AL355001.1	0.303948	1.44442e-11	postive		SCAF11	AC079766.1	0.493205	2.30436e-30	postive
PRKAA2	AC087286.2	0.57496	5.70153e-43	postive		BCL2L11	AL355001.1	0.46846	3.55664e-27	postive		TNF	LINC00839	0.306243	9.96882e-12	postive
HELLS	AL596223.1	0.574725	6.27107e-43	postive		BCL2L12	AL355001.1	-0.323694	5.33672e-13	negative		SCAF11	AC009299.2	0.652262	1.18021e-58	postive
PRKAA2	AC034229.4	0.574561	6.70189e-43	postive		BAD	AC004076.2	-0.350418	4.11963e-15	negative		PYCARD	AL158151.1	0.380833	8.97898e-18	postive
ZEB1	AL355488.1	0.574557	6.71458e-43	postive		BCL2L11	AC004076.2	0.408837	1.74967e-20	postive		TNF	AC107464.2	0.304763	1.26677e-11	postive
ZEB1	AL162724.2	0.574493	6.8897e-43	postive		BID	AL118516.1	0.332408	1.15034e-13	postive		IL1B	AP000593.3	0.439777	8.62413e-24	postive
ZEB1	AC018648.1	0.574416	7.10767e-43	postive		BAD	AP000350.6	-0.316331	1.87867e-12	negative		SCAF11	AP000593.3	0.675853	2.09653e-64	postive
ZEB1	PHC2-AS1	0.574411	7.12349e-43	postive		BCL2L11	AP000350.6	0.380635	9.36361e-18	postive		IL1B	LINC01050	0.598041	3.28488e-47	postive
ZEB1	AC040169.3	0.574408	7.13191e-43	postive		BCL2L12	AP000350.6	-0.302624	1.78639e-11	negative		SCAF11	LINC01050	0.469311	2.79019e-27	postive
HELLS	AL031005.1	0.574369	7.2454e-43	postive		BCL2L11	AC078852.2	0.349665	4.75522e-15	postive		SCAF11	AC011468.5	0.49275	2.65186e-30	postive
HELLS	CCDC18-AS1	0.574349	7.30531e-43	postive		BCL2A1	LINC01270	0.332299	1.17309e-13	postive		CASP6	AC098487.1	0.407499	2.38967e-20	postive
ZEB1	AC009704.2	0.574321	7.38831e-43	postive		BCL2L11	LINC01270	0.353707	2.19042e-15	postive		PYCARD	AL023803.1	0.410217	1.2667e-20	postive
LOX	BX322234.1	0.574261	7.57083e-43	postive		TNFRSF10A	TDRKH-AS1	-0.329079	2.07958e-13	negative		SCAF11	PLBD1-AS1	0.305152	1.18957e-11	postive
PTGS2	AF230666.2	0.574168	7.86196e-43	postive		FAS	AL049555.1	0.31927	1.14152e-12	postive		IL1B	AC109347.2	0.348563	5.86329e-15	postive
HELLS	AC012181.2	0.574131	7.98008e-43	postive		BMF	AL391422.4	0.427577	1.9085e-22	postive		SCAF11	AC109347.2	0.598869	2.28029e-47	postive
HELLS	AC068189.1	0.573741	9.34595e-43	postive		BAD	AC009754.1	-0.366709	1.67681e-16	negative		SCAF11	TSPOAP1-AS1	0.428566	1.49198e-22	postive
HELLS	AC010320.4	0.573709	9.46603e-43	postive		BCL2A1	AC009754.1	0.330409	1.64283e-13	postive		IL1B	AC087392.5	0.452893	2.6778e-25	postive
HELLS	AC009690.2	0.573676	9.59218e-43	postive		BCL2L11	AC009754.1	0.4979	5.3401e-31	postive		SCAF11	AC087392.5	0.315662	2.1026e-12	postive
ZEB1	Z93930.3	0.573607	9.86338e-43	postive		BCL2L12	AC009754.1	-0.341429	2.22993e-14	negative		IL1B	RERE-AS1	0.365435	2.16807e-16	postive
HELLS	AC141002.1	0.573588	9.9397e-43	postive		BCL2L2	RTCA-AS1	0.305319	1.15791e-11	postive		SCAF11	RERE-AS1	0.674243	5.38421e-64	postive
ZEB1	AC090517.2	0.573449	1.05132e-42	postive		BAD	AC097641.2	-0.33299	1.0366e-13	negative		IL1B	NR4A1AS	0.338353	3.92525e-14	postive
ZEB1	AC096992.2	0.573314	1.11027e-42	postive		BCL2L11	AC097641.2	0.428206	1.63206e-22	postive		SCAF11	NR4A1AS	0.318675	1.26316e-12	postive
HELLS	AC022165.1	0.573261	1.13428e-42	postive		BAD	LINC01473	-0.333706	9.11565e-14	negative		IL1B	LINC00622	0.505735	4.42564e-32	postive
HELLS	AC004241.4	0.573246	1.1414e-42	postive		BCL2L11	LINC01473	0.358745	8.20657e-16	postive		SCAF11	LINC00622	0.42886	1.38627e-22	postive
HELLS	AC112722.1	0.573157	1.183e-42	postive		BCL2L12	LINC01473	-0.322313	6.77519e-13	negative		IL1B	AL021707.1	0.378266	1.545e-17	postive
HELLS	AC011773.1	0.573006	1.25729e-42	postive		BAD	AC015849.3	-0.400459	1.2051e-19	negative		SCAF11	AL021707.1	0.416045	3.18235e-21	postive
PTGS2	AC026470.2	0.572846	1.34119e-42	postive		BCL2L11	AC015849.3	0.533121	4.33442e-36	postive		IL1B	ADAMTSL4-AS1	0.68862	9.55033e-68	postive
ZEB1	AP000692.1	0.572764	1.38665e-42	postive		BCL2L12	AC015849.3	-0.356522	1.26842e-15	negative		SCAF11	ADAMTSL4-AS1	0.60648	7.57208e-49	postive
HELLS	AC007639.1	0.572681	1.43343e-42	postive		BCL2L2	AC015849.3	0.332321	1.16845e-13	postive		IL1B	AC130371.1	0.55005	9.31709e-39	postive
PTGS2	AC012181.2	0.572651	1.45122e-42	postive		BAD	AC008033.3	-0.321733	7.48631e-13	negative		SCAF11	AC130371.1	0.665814	6.8059e-62	postive
HELLS	AC091185.1	0.572631	1.4627e-42	postive		BCL2A1	AC008033.3	0.362873	3.62318e-16	postive		PLCG1	AC010997.4	0.324783	4.41687e-13	postive
ZEB1	AL365361.1	0.572497	1.54405e-42	postive		BCL2L11	AC008033.3	0.445076	2.15959e-24	postive		SCAF11	AC024940.6	0.740254	3.05871e-83	postive
HELLS	SMC5-AS1	0.572325	1.65472e-42	postive		BAD	AC009120.3	-0.408166	2.04633e-20	negative		SCAF11	AP002449.1	0.657952	5.40105e-60	postive
LOX	AC144831.1	0.572308	1.66623e-42	postive		BCL2L11	AC009120.3	0.443067	3.66157e-24	postive		SCAF11	AGBL5-IT1	0.39976	1.41205e-19	postive
ZEB1	MPRIP-AS1	0.572064	1.83818e-42	postive		BCL2L12	AC009120.3	-0.330131	1.72595e-13	negative		SCAF11	OVOL1-AS1	0.542334	1.5994e-37	postive
HELLS	AC002550.2	0.571962	1.91477e-42	postive		BCL2L11	AL353796.1	0.330308	1.67269e-13	postive		SCAF11	AC002128.2	0.652362	1.11846e-58	postive
HELLS	AC087893.3	0.571933	1.93733e-42	postive		TNFRSF1A	AL353796.1	-0.32248	6.58263e-13	negative		PLCG1	LINC00265	0.566275	1.84344e-41	postive
PTGS2	AC060766.7	0.571925	1.94357e-42	postive		BCL2A1	LINC01235	0.37815	1.58287e-17	postive		SCAF11	AC005062.1	0.618699	2.62657e-51	postive
ZEB1	AP001793.1	0.571852	2.00169e-42	postive		BCL2L11	LINC01235	0.301368	2.18328e-11	postive		IL1B	AC011773.1	0.306372	9.76229e-12	postive
CRYAB	AL391422.4	0.571624	2.19332e-42	postive		CSE1L	RHPN1-AS1	0.352289	2.87886e-15	postive		SCAF11	AC011773.1	0.536767	1.18908e-36	postive
PTGS2	AC009269.5	0.571616	2.20029e-42	postive		BAD	AC020915.2	-0.346298	8.99408e-15	negative		SCAF11	AL132765.2	0.350897	3.7591e-15	postive
PTGS2	AL592148.3	0.571465	2.33831e-42	postive		BCL2L11	AC020915.2	0.495818	1.0241e-30	postive		SCAF11	AC010149.1	0.551326	5.78035e-39	postive
ZEB1	MCM3AP-AS1	0.571433	2.36826e-42	postive		BCL2L12	AC020915.2	-0.317823	1.45982e-12	negative		PLCG1	AC245140.2	0.431408	7.3164e-23	postive
HELLS	AL442067.2	0.571359	2.43991e-42	postive		BCL2L2	AC020915.2	0.310549	4.92787e-12	postive		SCAF11	AC007569.1	0.458838	5.27747e-26	postive
HELLS	SHANK2-AS2	0.571213	2.58661e-42	postive		BAD	GSN-AS1	-0.3293	1.99974e-13	negative		IL1B	AL136115.2	0.632947	2.57651e-54	postive
ZEB1	AC002128.1	0.571193	2.60754e-42	postive		BCL2A1	GSN-AS1	0.311725	4.057e-12	postive		SCAF11	AL136115.2	0.672163	1.80411e-63	postive
ZEB1	AC005674.2	0.57119	2.6109e-42	postive		BCL2L11	GSN-AS1	0.534158	3.00565e-36	postive		PLCG1	ASMTL-AS1	0.33346	9.52658e-14	postive
PTGS2	AC007362.1	0.570957	2.86705e-42	postive		BCL2L12	GSN-AS1	-0.323187	5.82588e-13	negative		CASP6	LINC01315	0.342789	1.73312e-14	postive
ZEB1	AC093752.2	0.570941	2.8853e-42	postive		BCL2L2	GSN-AS1	0.330019	1.76083e-13	postive		IL1B	AC005632.3	0.519094	5.44399e-34	postive
PTGS2	LINC01578	0.570825	3.02161e-42	postive		BAD	AP000866.6	-0.346124	9.29247e-15	negative		SCAF11	AC005632.3	0.719414	1.44189e-76	postive
LOX	BNC2-AS1	0.570808	3.04232e-42	postive		BCL2L11	AP000866.6	0.450026	5.7938e-25	postive		IL1B	AC115102.1	0.521942	2.07808e-34	postive
ZEB1	AC068620.2	0.5708	3.05203e-42	postive		BCL2L12	AP000866.6	-0.309992	5.40159e-12	negative		SCAF11	AC115102.1	0.597403	4.34923e-47	postive
ZEB1	AL354989.1	0.570775	3.08385e-42	postive		BCL2	AC124045.1	0.310161	5.25334e-12	postive		SCAF11	DGUOK-AS1	0.326717	3.15157e-13	postive
HELLS	AC245060.5	0.570743	3.12356e-42	postive		BCL2L11	AC124045.1	0.330366	1.6556e-13	postive		NOD2	AL139384.1	0.30769	7.87717e-12	postive
ZEB1	BCL2L1-AS1	0.57071	3.16491e-42	postive		BCL2L1	BX322234.2	0.31441	2.59433e-12	postive		PLCG1	AL139384.1	0.310126	5.28342e-12	postive
ZEB1	AC015727.1	0.57069	3.18961e-42	postive		BAD	AL360093.1	-0.355045	1.69069e-15	negative		IL1B	ZMIZ1-AS1	0.536343	1.38326e-36	postive
HELLS	AC091887.1	0.57056	3.35981e-42	postive		BCL2L11	AL360093.1	0.44651	1.47828e-24	postive		SCAF11	ZMIZ1-AS1	0.412753	6.96772e-21	postive
HELLS	NPSR1-AS1	0.570536	3.39254e-42	postive		BCL2L12	AL360093.1	-0.325939	3.6111e-13	negative		IL1B	AC010973.1	0.305387	1.14522e-11	postive
HELLS	AL121987.2	0.570526	3.40699e-42	postive		BAD	FARSA-AS1	-0.362416	3.96872e-16	negative		SCAF11	AC010973.1	0.487621	1.27332e-29	postive
ZEB1	AC211476.4	0.570375	3.61792e-42	postive		BCL2L11	FARSA-AS1	0.399424	1.52361e-19	postive		IL1B	EHD4-AS1	0.311815	3.99669e-12	postive
PTGS2	AC084117.1	0.570334	3.67853e-42	postive		BCL2L11	RNF213-AS1	0.493469	2.12342e-30	postive		SCAF11	EHD4-AS1	0.559018	3.11425e-40	postive
PRKAA2	AC011595.1	0.57032	3.69837e-42	postive		BCL2L2	RNF213-AS1	0.321693	7.53827e-13	postive		SCAF11	AL445489.1	0.53447	2.69084e-36	postive
ZEB1	AL592435.1	0.570313	3.7091e-42	postive		CASP10	RNF213-AS1	0.31371	2.91622e-12	postive		IL1B	AC112721.2	0.485389	2.49936e-29	postive
PTGS2	AC092755.1	0.570297	3.73323e-42	postive		BCL2L11	AC103591.3	0.332142	1.20643e-13	postive		SCAF11	AC112721.2	0.491042	4.484e-30	postive
ZEB1	LINC01094	0.570189	3.89826e-42	postive		BAD	AL360270.1	-0.333109	1.01472e-13	negative		IL1B	EDIL3-DT	0.46835	3.67025e-27	postive
LOX	AL161785.1	0.569989	4.22267e-42	postive		BAK1	AL360270.1	-0.329893	1.8005e-13	negative		SCAF11	EDIL3-DT	0.457589	7.44365e-26	postive
HELLS	AC027808.2	0.569859	4.44683e-42	postive		BCL2L11	AL360270.1	0.349654	4.76562e-15	postive		SCAF11	GHRLOS	0.564487	3.7235e-41	postive
ZEB1	APOA1-AS	0.569541	5.04875e-42	postive		BCL2L12	AL360270.1	-0.312134	3.79079e-12	negative		SCAF11	AL160314.2	0.321595	7.66602e-13	postive
HELLS	AC004637.1	0.569285	5.59141e-42	postive		BAD	AC010761.1	-0.301726	2.06203e-11	negative		PLCG1	AL590483.1	0.347448	7.24146e-15	postive
ZEB1	SENCR	0.569133	5.9404e-42	postive		BCL2L11	AC010761.1	0.370643	7.52694e-17	postive		IL1B	AC105460.2	0.371306	6.56942e-17	postive
PTGS2	AC069542.1	0.568879	6.57219e-42	postive		BAK1	AL035071.1	-0.306771	9.15003e-12	negative		SCAF11	AC005534.1	0.416494	2.8579e-21	postive
ZEB1	AC113143.1	0.568875	6.58269e-42	postive		BAD	AC002128.1	-0.39292	6.53117e-19	negative		IL1B	Z98885.3	0.337419	4.65512e-14	postive
PRKAA2	AC009754.1	0.568684	7.10208e-42	postive		BCL2L11	AC002128.1	0.529086	1.78131e-35	postive		SCAF11	Z98885.3	0.689138	6.9313e-68	postive
LOX	AC002091.1	0.56858	7.40298e-42	postive		BCL2L12	AC002128.1	-0.327107	2.94297e-13	negative		SCAF11	LINC01814	0.53803	7.56668e-37	postive
PRKAA2	AC026356.2	0.568539	7.52278e-42	postive		BCL2L2	AC002128.1	0.320959	8.55174e-13	postive		IL1B	CLDN10-AS1	0.530602	1.04972e-35	postive
ZEB1	TTC3-AS1	0.568497	7.65152e-42	postive		BCL2L11	LMO7-AS1	0.33927	3.3185e-14	postive		SCAF11	CLDN10-AS1	0.312737	3.42942e-12	postive
HELLS	LINC01091	0.568124	8.87157e-42	postive		BAD	AL122035.2	-0.396278	3.09282e-19	negative		SCAF11	TRG-AS1	0.427269	2.06076e-22	postive
PTGS2	AC025580.2	0.567981	9.38939e-42	postive		BAK1	AL122035.2	-0.317932	1.43301e-12	negative		TNF	TRG-AS1	0.376882	2.06596e-17	postive
PTGS2	AC025917.1	0.567667	1.06353e-41	postive		BCL2A1	AL122035.2	0.316595	1.7969e-12	postive		SCAF11	AC116552.1	0.32318	5.83321e-13	postive
ZEB1	AL354696.2	0.567448	1.15995e-41	postive		BCL2L11	AL122035.2	0.517374	9.6942e-34	postive		IL1B	AL358115.1	0.446657	1.42198e-24	postive
ZEB1	AC012181.2	0.567195	1.28182e-41	postive		BCL2L12	AL122035.2	-0.347063	7.78666e-15	negative		SCAF11	AL358115.1	0.669712	7.40545e-63	postive
ZEB1	AC005332.6	0.567187	1.28578e-41	postive		BCL2L2	AL122035.2	0.343429	1.53862e-14	postive		IL1B	AC090589.2	0.405828	3.52079e-20	postive
HELLS	AC021087.3	0.56718	1.28943e-41	postive		BAD	AC004988.1	-0.315322	2.22639e-12	negative		SCAF11	AC090589.2	0.626393	6.51999e-53	postive
ZEB1	EP300-AS1	0.567049	1.35796e-41	postive		BCL2A1	AC004988.1	0.523697	1.14261e-34	postive		PLCG1	AC012615.6	0.375101	2.99628e-17	postive
ZEB1	AC012464.2	0.567002	1.38368e-41	postive		BCL2L11	AC004988.1	0.481134	8.92212e-29	postive		SCAF11	MMP2-AS1	0.300385	2.55244e-11	postive
PRKAA2	AC007362.1	0.566926	1.42551e-41	postive		BCL2L12	AC004988.1	-0.300354	2.5653e-11	negative		TNF	MMP2-AS1	0.371134	6.80508e-17	postive
HELLS	AC080013.1	0.566853	1.4676e-41	postive		BCL2L11	KIF1C-AS1	0.407157	2.58745e-20	postive		SCAF11	AP003352.1	0.337533	4.55952e-14	postive
HELLS	AP000254.2	0.566688	1.56656e-41	postive		CASP10	KIF1C-AS1	0.357413	1.06575e-15	postive		SCAF11	MCCC1-AS1	0.565789	2.23265e-41	postive
HELLS	AC005674.2	0.566536	1.6634e-41	postive		BAD	AC110769.2	-0.396132	3.19574e-19	negative		IL1B	AC011978.2	0.302447	1.83791e-11	postive
HELLS	LRP1-AS	0.566474	1.70446e-41	postive		BCL2L11	AC110769.2	0.49922	3.52653e-31	postive		SCAF11	AC011978.2	0.678776	3.72716e-65	postive
ZEB1	PAXIP1-AS2	0.566425	1.73737e-41	postive		BCL2L12	AC110769.2	-0.377585	1.78281e-17	negative		PLCG1	AC073842.2	0.371981	5.71733e-17	postive
ZEB1	AL357874.2	0.566393	1.75976e-41	postive		BCL2	AL031846.2	0.312187	3.75757e-12	postive		IL1B	AC055811.1	0.427529	1.93171e-22	postive
PRKAA2	Z99289.3	0.565989	2.0636e-41	postive		BCL2L11	AL031846.2	0.51013	1.06364e-32	postive		SCAF11	AC055811.1	0.574109	8.05096e-43	postive
ZEB1	AC087501.4	0.565699	2.3131e-41	postive		BCL2L12	AL031846.2	-0.340259	2.76717e-14	negative		IL1B	AC134407.1	0.35069	3.91103e-15	postive
ZEB1	AL031432.3	0.565665	2.34472e-41	postive		BCL2L2	AL031846.2	0.396715	2.80445e-19	postive		SCAF11	AC134407.1	0.681344	8.03973e-66	postive
LOX	ST3GAL6-AS1	0.565511	2.49096e-41	postive		BAD	AL136988.2	-0.359543	7.01291e-16	negative		IL1B	AC073487.1	0.50845	1.83925e-32	postive
ZEB1	MYOSLID	0.565503	2.49884e-41	postive		BCL2L11	AL136988.2	0.519723	4.40319e-34	postive		SCAF11	AC073487.1	0.677575	7.59939e-65	postive
PRKAA2	MIR99AHG	0.565495	2.50626e-41	postive		BCL2L12	AL136988.2	-0.350939	3.72936e-15	negative		GSDMD	AC109587.1	-0.30341	1.57496e-11	negative
HELLS	AC018552.3	0.565426	2.57586e-41	postive		BAD	AL807757.2	-0.370305	8.06687e-17	negative		IL1B	AC109587.1	0.505959	4.11686e-32	postive
ZEB1	AC008870.2	0.565405	2.59678e-41	postive		BCL2A1	AL807757.2	0.369862	8.83139e-17	postive		SCAF11	AC109587.1	0.768769	1.72989e-93	postive
HELLS	EML4-AS1	0.565389	2.61351e-41	postive		BCL2L11	AL807757.2	0.528974	1.85252e-35	postive		SCAF11	Z84485.1	0.333832	8.91038e-14	postive
HELLS	AC124045.1	0.565312	2.69336e-41	postive		BCL2L12	AL807757.2	-0.339801	3.01048e-14	negative		IL1B	AC080013.1	0.411545	9.26696e-21	postive
PTGS2	AL133342.1	0.565211	2.80229e-41	postive		BCL2L11	SEC24B-AS1	0.310308	5.12767e-12	postive		SCAF11	AC080013.1	0.587491	3.13659e-45	postive
HELLS	AL355916.2	0.565174	2.84386e-41	postive		BAK1	LINC00662	-0.384336	4.24774e-18	negative		SCAF11	CHRM3-AS2	0.567606	1.08941e-41	postive
HELLS	AC022306.2	0.56506	2.97427e-41	postive		TNFRSF1A	LINC00662	-0.361623	4.64642e-16	negative		SCAF11	TTC28-AS1	0.348226	6.25065e-15	postive
PTGS2	AC090197.1	0.564965	3.08702e-41	postive		BAD	AC129510.1	-0.331076	1.45912e-13	negative		SCAF11	AC073326.1	0.616065	9.09459e-51	postive
ZEB1	SYNJ2-IT1	0.564792	3.30409e-41	postive		BCL2L11	AC129510.1	0.396974	2.64663e-19	postive		IL1B	BX284668.6	0.311967	3.89732e-12	postive
HELLS	AC004466.3	0.564551	3.6314e-41	postive		BCL2L2	AC129510.1	0.336126	5.8889e-14	postive		SCAF11	BX284668.6	0.490828	4.78911e-30	postive
PRKAA2	AL358216.1	0.56452	3.67539e-41	postive		BAD	AC022558.3	-0.382996	5.6615e-18	negative		IL1B	AC104462.2	0.707584	4.82884e-73	postive
HELLS	MRPS30-DT	0.56451	3.6899e-41	postive		BCL2A1	AC022558.3	0.316219	1.91439e-12	postive		SCAF11	AC104462.2	0.455903	1.18131e-25	postive
HELLS	AC003991.1	0.564469	3.75014e-41	postive		BCL2L11	AC022558.3	0.46168	2.40046e-26	postive		IL1B	AP002336.2	0.467445	4.74662e-27	postive
CRYAB	LINC02381	0.564399	3.85419e-41	postive		BCL2L12	AC022558.3	-0.340041	2.88023e-14	negative		SCAF11	AP002336.2	0.687806	1.57781e-67	postive
PRKAA2	LAMC1-AS1	0.564291	4.02107e-41	postive		BCL2L11	AC090772.3	0.365478	2.14928e-16	postive		IL1B	KCNQ1OT1	0.421405	8.72178e-22	postive
HELLS	HLCS-IT1	0.564285	4.03014e-41	postive		BAD	AC243967.2	-0.31264	3.48531e-12	negative		SCAF11	KCNQ1OT1	0.672336	1.63218e-63	postive
HELLS	AC079336.1	0.564108	4.31945e-41	postive		BCL2L11	AC243967.2	0.360957	5.30325e-16	postive		SCAF11	CASC2	0.591085	6.76496e-46	postive
HELLS	AC010132.4	0.564082	4.36345e-41	postive		BAD	AC068790.3	-0.378206	1.56449e-17	negative		SCAF11	STAM-AS1	0.437151	1.69754e-23	postive
ZEB1	AC055811.1	0.563967	4.56508e-41	postive		BCL2L11	AC068790.3	0.466356	6.46299e-27	postive		IL18	LINC00570	0.338141	4.08059e-14	postive
ZEB1	PSPC1-AS2	0.563912	4.66346e-41	postive		BCL2L12	AC068790.3	-0.356289	1.32739e-15	negative		GSDMD	AL137003.1	-0.305597	1.10688e-11	negative
HELLS	AL391421.1	0.563737	4.99413e-41	postive		BAD	AL139246.5	0.328005	2.51347e-13	postive		IL1B	AL137003.1	0.30724	8.47719e-12	postive
ZEB1	LINC02614	0.5635	5.47848e-41	postive		BAD	AC103740.1	-0.405667	3.65482e-20	negative		SCAF11	AL137003.1	0.578436	1.37719e-43	postive
ZEB1	AL109761.1	0.563443	5.60212e-41	postive		BCL2L11	AC103740.1	0.515616	1.74334e-33	postive		SCAF11	AC022211.4	0.382796	5.9095e-18	postive
HELLS	JPX	0.563204	6.15128e-41	postive		BCL2L12	AC103740.1	-0.414168	4.98073e-21	negative		SCAF11	AC010463.3	0.474523	6.2182e-28	postive
PTGS2	AL590723.1	0.563154	6.27038e-41	postive		BCL2L2	AC103740.1	0.330029	1.75765e-13	postive		SCAF11	AC022306.2	0.571263	2.5356e-42	postive
HELLS	AC112496.1	0.56305	6.52978e-41	postive		BCL2L11	ABALON	0.430002	1.0416e-22	postive		SCAF11	ZNF32-AS2	0.586689	4.40606e-45	postive
ZEB1	AC093567.1	0.562819	7.14661e-41	postive		BCL2L11	AC027237.5	0.348127	6.36814e-15	postive		GSDMD	AC093297.2	-0.40838	1.94645e-20	negative
HELLS	AC005046.2	0.562598	7.78952e-41	postive		BAD	C2orf27A	-0.313771	2.88655e-12	negative		PYCARD	AC093297.2	-0.306428	9.67424e-12	negative
ZEB1	UGDH-AS1	0.562563	7.89521e-41	postive		BAK1	C2orf27A	-0.323633	5.39283e-13	negative		SCAF11	AC093297.2	0.653211	7.08799e-59	postive
ZEB1	AP003071.4	0.562377	8.48981e-41	postive		BCL2A1	C2orf27A	0.369235	1.00373e-16	postive		CASP6	MAPKAPK5-AS1	0.442597	4.14048e-24	postive
ZEB1	AC073641.1	0.562359	8.54835e-41	postive		BCL2L11	C2orf27A	0.455454	1.3352e-25	postive		PLCG1	AC005306.1	0.327544	2.72567e-13	postive
PTGS2	AL157395.1	0.56234	8.61045e-41	postive		BCL2L12	C2orf27A	-0.416954	2.55962e-21	negative		SCAF11	AC012360.1	0.631756	4.66266e-54	postive
ZEB1	AC008456.1	0.562331	8.6414e-41	postive		BCL2L11	AC090517.2	0.362655	3.784e-16	postive		IL1B	AL133342.1	0.572268	1.69323e-42	postive
PTGS2	AC018410.1	0.562309	8.71618e-41	postive		BCL2A1	AC079209.2	0.405918	3.44847e-20	postive		SCAF11	AL133342.1	0.66343	2.60105e-61	postive
PRKAA2	AC120042.2	0.562161	9.23421e-41	postive		BCL2L11	AC079209.2	0.408017	2.1187e-20	postive		SCAF11	AL596223.1	0.563542	5.3899e-41	postive
PTGS2	AC022973.5	0.561979	9.91112e-41	postive		BAD	AC023510.2	-0.315567	2.13662e-12	negative		SCAF11	AL392172.1	0.347243	7.52679e-15	postive
PTGS2	AC002550.2	0.561945	1.00402e-40	postive		BCL2	AC023510.2	0.30352	1.54727e-11	postive		SCAF11	AC124312.3	0.471413	1.52779e-27	postive
ZEB1	AC016727.1	0.561846	1.04337e-40	postive		BCL2L11	AC023510.2	0.475906	4.15668e-28	postive		SCAF11	AP002812.5	0.564267	4.05882e-41	postive
ZEB1	AC008124.1	0.561766	1.07632e-40	postive		BCL2L11	AC004551.1	0.434341	3.48185e-23	postive		SCAF11	AC104463.2	0.310758	4.76094e-12	postive
HELLS	AC079766.1	0.56176	1.0789e-40	postive		BAD	VIPR1-AS1	-0.350417	4.11996e-15	negative		IL1B	ACAP2-IT1	0.447045	1.28304e-24	postive
ZEB1	SEPSECS-AS1	0.561659	1.12196e-40	postive		BCL2L11	VIPR1-AS1	0.380339	9.97131e-18	postive		SCAF11	ACAP2-IT1	0.727275	5.18289e-79	postive
HELLS	AC037487.1	0.561573	1.16014e-40	postive		BCL2L12	VIPR1-AS1	-0.360391	5.93149e-16	negative		SCAF11	TTC39C-AS1	0.340757	2.52476e-14	postive
HELLS	AC012358.4	0.561562	1.16542e-40	postive		BCL2L2	TAPT1-AS1	0.304142	1.39997e-11	postive		IL1B	AL158151.4	0.343263	1.58701e-14	postive
ZEB1	AC131934.1	0.561353	1.26357e-40	postive		BCL2L1	AC026462.3	0.342576	1.80326e-14	postive		IL1B	AL132989.2	0.509695	1.22625e-32	postive
ZEB1	AL445223.1	0.561284	1.29805e-40	postive		BAK1	DNAJC3-DT	-0.306162	1.01016e-11	negative		SCAF11	AL132989.2	0.752154	2.39413e-87	postive
PRNP	AC104083.1	0.561204	1.33902e-40	postive		BCL2L12	DNAJC3-DT	-0.303107	1.6534e-11	negative		SCAF11	AC008280.2	0.431441	7.25568e-23	postive
PTGS2	AC109587.1	0.561193	1.34472e-40	postive		BCL2A1	LINC01139	0.339459	3.20535e-14	postive		SCAF11	AL354993.2	0.427025	2.18958e-22	postive
ZEB1	AC062037.3	0.561032	1.43111e-40	postive		BAD	AC007684.2	-0.344636	1.22835e-14	negative		IL1B	AF117829.1	0.342815	1.72488e-14	postive
HELLS	NCOA7-AS1	0.561003	1.44741e-40	postive		BCL2A1	AC007684.2	0.344556	1.24692e-14	postive		SCAF11	AF117829.1	0.678654	4.0073e-65	postive
ZEB1	FENDRR	0.560958	1.47256e-40	postive		BCL2L11	AC007684.2	0.457711	7.1975e-26	postive		SCAF11	TRIM31-AS1	0.307448	8.19414e-12	postive
HELLS	LINC00571	0.560942	1.48166e-40	postive		BCL2L12	AC007684.2	-0.317916	1.43688e-12	negative		SCAF11	AP001610.2	0.353865	2.12468e-15	postive
ZEB1	AL662844.3	0.560846	1.53781e-40	postive		BCL2L2	AL136084.3	0.324376	4.74086e-13	postive		TNF	AC243960.1	0.378554	5.87359e-15	postive
PRKAA2	AC107021.1	0.560814	1.55726e-40	postive		CSE1L	AL162595.1	0.323247	5.76566e-13	postive		SCAF11	LINC01967	0.410813	1.10105e-20	postive
ZEB1	LINC02762	0.560568	1.71271e-40	postive		TNFRSF1A	AL162595.1	-0.375539	2.73525e-17	negative		SCAF11	AL138820.1	0.665984	6.18522e-62	postive
ZEB1	AL357054.4	0.560527	1.73972e-40	postive		BCL2L1	MAFG-DT	0.352139	2.96282e-15	postive		IL1B	AL008729.1	0.559114	3.0017e-40	postive
ZEB1	LMO7-AS1	0.560507	1.75378e-40	postive		BCL2L12	MAFG-DT	0.443431	3.32791e-24	postive		SCAF11	AL008729.1	0.559729	2.36787e-40	postive
PTGS2	AC112721.1	0.560333	1.87559e-40	postive		BAD	MIR181A2HG	-0.343706	1.46126e-14	negative		SCAF11	AL596202.1	0.646674	2.28976e-57	postive
HELLS	AC011330.2	0.560134	2.02536e-40	postive		BCL2L11	MIR181A2HG	0.441262	5.86546e-24	postive		IL1B	AC008537.2	0.480581	1.05101e-28	postive
HELLS	AL354696.2	0.559989	2.14189e-40	postive		BCL2L12	MIR181A2HG	-0.332994	1.03586e-13	negative		SCAF11	AC008537.2	0.643645	1.11311e-56	postive
ZEB1	AL157400.4	0.559872	2.24063e-40	postive		TNFRSF1A	MIR181A2HG	-0.303071	1.66306e-11	negative		IL1B	AC093567.1	0.454045	1.95957e-25	postive
PTGS2	AC006460.1	0.559685	2.40835e-40	postive		CSE1L	AC124798.1	0.340486	2.65371e-14	postive		SCAF11	AC093567.1	0.50322	9.91293e-32	postive
ZEB1	AL121672.1	0.559575	2.51323e-40	postive		BAD	AC040904.1	-0.373133	4.50756e-17	negative		IL1B	AC125437.1	0.512391	5.0675e-33	postive
LOX	AL035530.2	0.559561	2.52675e-40	postive		BCL2L11	AC040904.1	0.47308	9.44846e-28	postive		SCAF11	AC125437.1	0.614158	2.21864e-50	postive
PRKAA2	AL049838.1	0.559389	2.69954e-40	postive		BCL2L12	AC040904.1	-0.337113	4.92155e-14	negative		SCAF11	AC093157.2	0.598401	2.80377e-47	postive
PRKAA2	AL110505.1	0.559385	2.70425e-40	postive		BAD	CCDC18-AS1	-0.377725	1.73092e-17	negative		PLCG1	SNHG20	0.452599	2.89929e-25	postive
ZEB1	AL162734.1	0.559365	2.72516e-40	postive		BCL2L11	CCDC18-AS1	0.481981	6.93463e-29	postive		SCAF11	SHANK2-AS2	0.546404	3.6033e-38	postive
HELLS	AL513327.2	0.55919	2.91516e-40	postive		BCL2L12	CCDC18-AS1	-0.40199	8.50468e-20	negative		SCAF11	AC004067.1	0.660094	1.66229e-60	postive
ZEB1	AC012360.1	0.559151	2.95926e-40	postive		BCL2L2	CCDC18-AS1	0.357068	1.1401e-15	postive		SCAF11	DIAPH2-AS1	0.67785	6.45678e-65	postive
HELLS	AL683813.2	0.559084	3.03647e-40	postive		TNFRSF1A	CCDC18-AS1	-0.315446	2.18044e-12	negative		IL1B	AC092301.1	0.31044	5.01722e-12	postive
HELLS	CCAT2	0.559049	3.07772e-40	postive		BAD	AL121987.2	-0.35192	3.09019e-15	negative		SCAF11	AC092301.1	0.52014	3.82573e-34	postive
PRKAA2	AC093535.1	0.559036	3.0921e-40	postive		BCL2L11	AL121987.2	0.481973	6.95128e-29	postive		IL1B	AL050320.1	0.320678	8.97301e-13	postive
PRKAA2	AL158163.1	0.558962	3.18215e-40	postive		BAD	AP001528.1	-0.344362	1.293e-14	negative		SCAF11	AL050320.1	0.594631	1.46066e-46	postive
HELLS	AP006259.1	0.558834	3.34195e-40	postive		BCL2L11	AP001528.1	0.456134	1.10914e-25	postive		SCAF11	AC009118.3	0.553953	2.1499e-39	postive
HELLS	AP001528.1	0.558702	3.51586e-40	postive		BCL2L12	AP001528.1	-0.35904	7.74402e-16	negative		SCAF11	AP001267.3	0.392327	7.4475e-19	postive
ZEB1	GORAB-AS1	0.558655	3.58102e-40	postive		BCL2L1	ZNF341-AS1	0.335478	6.62151e-14	postive		IL1B	ADAMTS9-AS1	0.464724	1.02399e-26	postive
ZEB1	DLEU2	0.558534	3.75086e-40	postive		BCL2L11	AL110115.2	0.315189	2.27673e-12	postive		SCAF11	ADAMTS9-AS1	0.673268	9.50199e-64	postive
ZEB1	SCAT2	0.55851	3.78625e-40	postive		BCL2L11	TSC22D1-AS1	0.330273	1.68321e-13	postive		SCAF11	CBR3-AS1	0.433835	3.9593e-23	postive
ZEB1	AC015922.3	0.55835	4.02494e-40	postive		BCL2L12	TSC22D1-AS1	-0.318791	1.23842e-12	negative		SCAF11	ARHGAP27P1-BPTFP1-KPNA2P3	0.30038	2.55478e-11	postive
PRKAA2	AC007663.4	0.558342	4.03811e-40	postive		BCL2L11	LINC01730	0.320725	8.90167e-13	postive		IL1B	AL513550.1	0.306758	9.16879e-12	postive
ZEB1	AC009262.1	0.558263	4.16263e-40	postive		CASP10	LINC01730	0.323433	5.58349e-13	postive		SCAF11	AL513550.1	0.530377	1.13573e-35	postive
HELLS	AC010530.1	0.558228	4.21899e-40	postive		BCL2L11	AL158163.2	0.378757	1.39308e-17	postive		SCAF11	AL731571.1	0.401679	9.1284e-20	postive
HELLS	AC006042.3	0.558216	4.23733e-40	postive		BAD	AL080317.1	-0.347847	6.71474e-15	negative		IL1B	AP005329.1	0.503024	1.0553e-31	postive
HELLS	AC073896.3	0.558132	4.3762e-40	postive		BCL2L11	AL080317.1	0.457993	6.65984e-26	postive		SCAF11	AP005329.1	0.370261	8.13854e-17	postive
HELLS	AC005674.1	0.558023	4.56333e-40	postive		BCL2L12	AL080317.1	-0.321818	7.37806e-13	negative		SCAF11	LINC02177	0.413796	5.4406e-21	postive
HELLS	AL360219.2	0.557849	4.87785e-40	postive		CASP7	AL133297.2	0.302024	1.96646e-11	postive		TNF	LINC01686	0.344938	1.1609e-14	postive
PTGS2	AC008033.3	0.557644	5.27606e-40	postive		BAD	AC083805.2	-0.386445	2.69528e-18	negative		SCAF11	AF131215.5	0.450021	5.80267e-25	postive
ZEB1	AC011815.1	0.557641	5.28393e-40	postive		BCL2L11	AC083805.2	0.452317	3.12853e-25	postive		SCAF11	SNRK-AS1	0.433604	4.19912e-23	postive
ZEB1	PRR34	0.557474	5.63286e-40	postive		BCL2L12	AC083805.2	-0.330328	1.66678e-13	negative		IL1B	AC090825.1	0.523984	1.03557e-34	postive
MYC	FAM222A-AS1	0.557426	5.73658e-40	postive		BAD	AC010422.4	-0.360403	5.9177e-16	negative		SCAF11	AC090825.1	0.496268	8.90174e-31	postive
EPAS1	AC144831.1	0.55738	5.83834e-40	postive		BCL2L11	AC010422.4	0.47653	3.46425e-28	postive		IL1B	AC004943.1	0.336226	5.78231e-14	postive
HELLS	AC104791.1	0.557314	5.98765e-40	postive		BCL2L12	AC010422.4	-0.340581	2.60767e-14	negative		SCAF11	AC004943.1	0.675387	2.75615e-64	postive
PRKAA2	AP000919.1	0.557257	6.12036e-40	postive		BAD	AC018926.1	-0.379912	1.09145e-17	negative		SCAF11	AC078820.2	0.394705	4.39482e-19	postive
ZEB1	AC020978.7	0.557221	6.20472e-40	postive		BCL2L11	AC018926.1	0.48012	1.20502e-28	postive		GSDMD	Z97989.1	-0.33343	9.57798e-14	negative
HELLS	AL929236.1	0.557194	6.26891e-40	postive		BCL2L12	AC018926.1	-0.365251	2.25004e-16	negative		IL1B	Z97989.1	0.394042	5.09248e-19	postive
PRKAA2	LINC02762	0.557175	6.31477e-40	postive		BCL2L12	VPS9D1-AS1	0.423383	5.37865e-22	postive		SCAF11	Z97989.1	0.602116	5.39581e-48	postive
ZEB1	AC025175.1	0.556986	6.7861e-40	postive		CSE1L	VPS9D1-AS1	0.320672	8.98223e-13	postive		NOD2	AL034550.1	0.308469	6.93611e-12	postive
PTGS2	AC025034.1	0.556974	6.81809e-40	postive		BCL2A1	LINC01561	0.444801	2.32168e-24	postive		PLCG1	AL034550.1	0.437581	1.52012e-23	postive
HELLS	AC120042.2	0.556875	7.0818e-40	postive		BAD	AC022893.1	-0.320671	8.98405e-13	negative		SCAF11	AL034550.1	0.516046	1.51043e-33	postive
HELLS	AL161729.2	0.556833	7.19671e-40	postive		BCL2L11	AC022893.1	0.449954	5.90643e-25	postive		SCAF11	SRD5A3-AS1	0.391655	8.63737e-19	postive
ZEB1	SOCAR	0.556599	7.86811e-40	postive		BCL2L12	AC022893.1	-0.302722	1.75874e-11	negative		CASP6	AC009093.1	-0.323485	5.53329e-13	negative
ZEB1	FAM78B-AS1	0.556455	8.31192e-40	postive		BCL2L12	AL163051.1	0.30439	1.34527e-11	postive		IL1B	AC009093.1	0.518182	7.39511e-34	postive
HELLS	AF127577.4	0.556415	8.44107e-40	postive		BID	AL163051.1	0.417874	2.05142e-21	postive		SCAF11	AC009093.1	0.452508	2.97143e-25	postive
PTGS2	AC048341.2	0.556318	8.75864e-40	postive		BAD	AC023794.3	-0.30626	9.94122e-12	negative		IL1B	GORAB-AS1	0.549765	1.03641e-38	postive
HELLS	EHD4-AS1	0.556302	8.81151e-40	postive		BCL2L11	AC023794.3	0.432636	5.36574e-23	postive		SCAF11	GORAB-AS1	0.501506	1.71134e-31	postive
PRKAA2	AC004832.4	0.556192	9.18846e-40	postive		BCL2L12	AC023794.3	-0.306771	9.15012e-12	negative		TNF	GORAB-AS1	0.365937	1.95938e-16	postive
ZEB1	GK-AS1	0.555997	9.89601e-40	postive		BAD	AL592435.1	-0.378134	1.58851e-17	negative		IL1B	AP001429.1	0.455019	1.50345e-25	postive
ZEB1	AL359715.2	0.555952	1.00696e-39	postive		BCL2L11	AL592435.1	0.471447	1.51284e-27	postive		SCAF11	AP001429.1	0.72595	1.35702e-78	postive
PTGS2	AL359962.2	0.55588	1.03489e-39	postive		BCL2L12	AL592435.1	-0.361908	4.39076e-16	negative		SCAF11	GNG12-AS1	0.636281	4.83229e-55	postive
MT1G	PCAT14	0.555762	1.08244e-39	postive		TNFRSF1A	AL592435.1	-0.327865	2.5758e-13	negative		SCAF11	AC007292.2	0.326508	3.26885e-13	postive
HELLS	DNM3OS	0.555708	1.10495e-39	postive		BAD	FLNB-AS1	-0.36818	1.24438e-16	negative		SCAF11	ITGA9-AS1	0.400791	1.11747e-19	postive
ZEB1	AL354726.1	0.555635	1.1358e-39	postive		BCL2L11	FLNB-AS1	0.515948	1.56096e-33	postive		IL1B	DLEU1	0.33631	5.69489e-14	postive
HELLS	SLC16A1-AS1	0.555542	1.17694e-39	postive		BCL2L12	FLNB-AS1	-0.321993	7.15964e-13	negative		SCAF11	DLEU1	0.676384	1.53437e-64	postive
PTGS2	MALAT1	0.55541	1.23741e-39	postive		BCL2L2	FLNB-AS1	0.380308	1.00363e-17	postive		IL1B	AC026367.3	0.342082	1.97607e-14	postive
HELLS	AC011468.1	0.555399	1.2425e-39	postive		BAK1	U62317.2	0.317034	1.66834e-12	postive		SCAF11	AC026367.3	0.567571	1.10459e-41	postive
PTGS2	MIR100HG	0.555231	1.32467e-39	postive		BAD	AC018752.1	-0.381529	7.74395e-18	negative		SCAF11	AC008434.1	0.574312	7.41523e-43	postive
HELLS	AC007036.2	0.555195	1.34279e-39	postive		BCL2L11	AC018752.1	0.557572	5.42441e-40	postive		SCAF11	MCM3AP-AS1	0.686759	3.00472e-67	postive
ZEB1	AL096701.3	0.55506	1.41365e-39	postive		BCL2L12	AC018752.1	-0.376765	2.11709e-17	negative		IL1B	JMJD1C-AS1	0.322194	6.91523e-13	postive
ZEB1	AC093726.1	0.555045	1.42122e-39	postive		BCL2L2	AC018752.1	0.31092	4.63494e-12	postive		SCAF11	JMJD1C-AS1	0.474369	6.50372e-28	postive
ZEB1	AC006504.1	0.555017	1.43671e-39	postive		BCL2L11	AC008969.1	0.331187	1.43058e-13	postive		IL1B	AC113346.1	0.358465	8.67082e-16	postive
PTGS2	APOA1-AS	0.55485	1.53041e-39	postive		BCL2L2	AC008969.1	0.321529	7.75343e-13	postive		SCAF11	AC069281.2	-0.32005	9.99201e-13	negative
HELLS	AL121772.2	0.554802	1.55868e-39	postive		BAD	TTC3-AS1	-0.3435	1.51846e-14	negative		SCAF11	AL451069.2	0.442883	3.8417e-24	postive
HELLS	AL021707.7	0.554795	1.563e-39	postive		BCL2L11	TTC3-AS1	0.459651	4.21585e-26	postive		IL1B	MIR3945HG	0.853695	1.4966e-135	postive
PTGS2	AL359715.2	0.554758	1.58519e-39	postive		BCL2L12	TTC3-AS1	-0.330194	1.70673e-13	negative		SCAF11	MIR3945HG	0.367967	1.29936e-16	postive
PRKAA2	CCDC18-AS1	0.554722	1.60666e-39	postive		BAD	AC020915.1	-0.375875	2.55008e-17	negative		TNF	MIR3945HG	0.430114	1.01287e-22	postive
HELLS	GRM8-AS1	0.554623	1.66827e-39	postive		BCL2L11	AC020915.1	0.569307	5.54306e-42	postive		GSDMD	AC004908.2	-0.328415	2.33802e-13	negative
PRKAA2	AP002907.1	0.554553	1.71292e-39	postive		BCL2L12	AC020915.1	-0.302947	1.6964e-11	negative		IL1B	AC004908.2	0.311718	4.06152e-12	postive
ZEB1	AL158212.3	0.554484	1.75861e-39	postive		BAD	AC018410.1	-0.361563	4.70234e-16	negative		SCAF11	AC004908.2	0.649471	5.23009e-58	postive
ZEB1	AF001548.1	0.554373	1.83396e-39	postive		BCL2A1	AC018410.1	0.378848	1.36664e-17	postive		GSDMD	OIP5-AS1	-0.40416	5.17214e-20	negative
HELLS	AL359715.2	0.554202	1.9568e-39	postive		BCL2L11	AC018410.1	0.559644	2.44697e-40	postive		IL1B	OIP5-AS1	0.399382	1.53818e-19	postive
ZEB1	AC115102.1	0.553953	2.15033e-39	postive		BCL2L12	AC018410.1	-0.342719	1.75603e-14	negative		PYCARD	OIP5-AS1	-0.346636	8.44017e-15	negative
ZEB1	UBOX5-AS1	0.553886	2.20492e-39	postive		BAD	AL022097.1	-0.370964	7.04716e-17	negative		SCAF11	OIP5-AS1	0.732402	1.18455e-80	postive
ZEB1	LINC00894	0.553711	2.35574e-39	postive		BCL2A1	AL022097.1	0.319763	1.04942e-12	postive		SCAF11	AL009179.1	0.472625	1.07741e-27	postive
ZEB1	AP001189.1	0.55352	2.5322e-39	postive		BCL2L11	AL022097.1	0.501838	1.53959e-31	postive		IL1B	AC005021.1	0.335589	6.4904e-14	postive
PTGS2	AC115102.1	0.553383	2.66661e-39	postive		BCL2L12	AL022097.1	-0.350581	3.99317e-15	negative		SCAF11	AC005021.1	0.631986	4.15786e-54	postive
PRKAA2	CARMN	0.553278	2.77491e-39	postive		BAD	AP001189.1	-0.317228	1.61453e-12	negative		IL1B	RSF1-IT1	0.440715	6.7613e-24	postive
HELLS	AC007785.3	0.553268	2.78468e-39	postive		BCL2L11	AP001189.1	0.348322	6.13762e-15	postive		SCAF11	RSF1-IT1	0.716592	1.03821e-75	postive
HELLS	TNFRSF10A-AS1	0.553224	2.83135e-39	postive		BCL2L12	AP001189.1	-0.35493	1.72885e-15	negative		SCAF11	CTBP1-AS	0.357858	9.76718e-16	postive
HELLS	A2M-AS1	0.553177	2.88234e-39	postive		BCL2L2	AP001189.1	0.317574	1.5228e-12	postive		IL1B	AL031770.1	0.41581	3.36687e-21	postive
HELLS	AC005277.2	0.553113	2.95319e-39	postive		BCL2L11	AC011337.1	0.357366	1.07552e-15	postive		SCAF11	AL031770.1	0.689321	6.18507e-68	postive
HELLS	AC025857.2	0.55298	3.10449e-39	postive		BCL2L11	PSPC1-AS2	0.393949	5.19917e-19	postive		IL1B	AC011815.1	0.467761	4.33962e-27	postive
ZEB1	LINC02328	0.552913	3.18334e-39	postive		BCL2A1	BHLHE40-AS1	0.332837	1.06543e-13	postive		SCAF11	AC011815.1	0.667927	2.05396e-62	postive
CRYAB	AC120049.1	0.552817	3.30116e-39	postive		BCL2L11	BHLHE40-AS1	0.349195	5.20015e-15	postive		IL1B	AC026401.2	0.461884	2.26758e-26	postive
ZEB1	AC093227.1	0.55274	3.39829e-39	postive		FAS	BHLHE40-AS1	0.355623	1.51097e-15	postive		SCAF11	AC026401.2	0.679855	1.96018e-65	postive
ZEB1	AL008729.1	0.552706	3.44275e-39	postive		CASP7	AC127521.1	0.415406	3.7078e-21	postive		PLCG1	AC021491.2	0.390523	1.10787e-18	postive
ZEB1	AL121895.1	0.552627	3.54552e-39	postive		CSE1L	AC127521.1	-0.323611	5.41424e-13	negative		IL1B	AL158825.2	0.350816	3.81762e-15	postive
HELLS	AL139807.1	0.552616	3.56011e-39	postive		BCL2L11	AC104791.1	0.459597	4.27902e-26	postive		SCAF11	AL158825.2	0.759506	5.29239e-90	postive
HELLS	AC108463.2	0.552416	3.83909e-39	postive		BAD	SMAD9-IT1	-0.309106	6.24847e-12	negative		IL1B	AC099811.1	0.401122	1.03641e-19	postive
PTGS2	AL008729.1	0.552268	4.05834e-39	postive		BAD	CARNMT1-AS1	-0.38214	6.79848e-18	negative		SCAF11	AC099811.1	0.723363	8.7414e-78	postive
HELLS	ADAMTSL4-AS1	0.552127	4.27959e-39	postive		BCL2L11	CARNMT1-AS1	0.510797	8.55327e-33	postive		SCAF11	PRR7-AS1	0.387994	1.9256e-18	postive
ZEB1	AC145146.1	0.552005	4.48033e-39	postive		BCL2L12	CARNMT1-AS1	-0.354782	1.77924e-15	negative		GSDMD	ZNF236-DT	0.334514	7.88053e-14	postive
LOX	EDIL3-DT	0.551907	4.6484e-39	postive		BCL2	AC103858.1	0.347584	7.05736e-15	postive		SCAF11	ZNF236-DT	-0.331794	1.2838e-13	negative
ZEB1	AC103923.1	0.551863	4.72567e-39	postive		BCL2L11	AC103858.1	0.37576	2.61209e-17	postive		SCAF11	ARHGEF38-IT1	0.56605	2.01456e-41	postive
HELLS	ZFHX2-AS1	0.551793	4.85271e-39	postive		BCL2L12	AC103858.1	-0.327517	2.73843e-13	negative		SCAF11	AC011468.1	0.587037	3.80235e-45	postive
ZEB1	AL136985.2	0.551775	4.88534e-39	postive		BCL2	U62631.1	0.305101	1.19941e-11	postive		IL1B	AC011933.2	0.492063	3.2767e-30	postive
HELLS	AC007728.3	0.551768	4.89704e-39	postive		BAD	CNOT10-AS1	-0.349783	4.64965e-15	negative		SCAF11	AC011933.2	0.707586	4.82075e-73	postive
PRKAA2	AP002812.3	0.55162	5.17828e-39	postive		BCL2L11	CNOT10-AS1	0.457102	8.50717e-26	postive		IL1B	AP002490.1	0.395401	3.76279e-19	postive
HELLS	EIPR1-IT1	0.551616	5.18589e-39	postive		BCL2L12	CNOT10-AS1	-0.316877	1.71335e-12	negative		SCAF11	AP002490.1	0.644875	5.86935e-57	postive
PRKAA2	AC104462.2	0.551419	5.58389e-39	postive		BCL2A1	AC005776.2	0.340405	2.69366e-14	postive		SCAF11	AC010132.4	0.602881	3.83129e-48	postive
ZEB1	AC112722.1	0.55122	6.01525e-39	postive		BCL2L11	AC005776.2	0.460493	3.33901e-26	postive		SCAF11	LINC01876	0.380805	9.03101e-18	postive
HELLS	AC064836.1	0.551087	6.3231e-39	postive		BCL2L12	AC005776.2	-0.325757	3.72755e-13	negative		SCAF11	AL590729.1	0.529305	1.65067e-35	postive
ZEB1	AC064801.1	0.551009	6.5104e-39	postive		BAD	AC009090.3	-0.352815	2.60189e-15	negative		SCAF11	AC020891.3	0.606094	9.01731e-49	postive
HELLS	AC010463.3	0.550663	7.40947e-39	postive		BCL2L11	AC009090.3	0.490077	6.02661e-30	postive		SCAF11	AC040160.1	0.320554	9.16613e-13	postive
PRKAA2	ZBTB20-AS5	0.550469	7.96701e-39	postive		BCL2L12	AC009090.3	-0.36407	2.85177e-16	negative		IL1B	AC007319.1	0.352288	2.87922e-15	postive
PRKAA2	Z82217.1	0.550426	8.09543e-39	postive		BCL2A1	AP003555.1	0.30778	7.76198e-12	postive		SCAF11	AC007319.1	0.645253	4.81828e-57	postive
PRKAA2	AC079915.1	0.550305	8.47129e-39	postive		BCL2L11	AP003555.1	0.446541	1.46629e-24	postive		SCAF11	AC008870.2	0.594511	1.53872e-46	postive
HELLS	AL158212.3	0.550138	9.01768e-39	postive		BCL2L11	PRR34	0.348635	5.78373e-15	postive		PLCG1	AC012313.1	0.350418	4.11961e-15	postive
HELLS	AC098484.1	0.550088	9.18593e-39	postive		BCL2A1	AC002550.2	0.348252	6.21935e-15	postive		SCAF11	DTNB-AS1	0.362108	4.21946e-16	postive
ZEB1	AL031666.2	0.549969	9.60399e-39	postive		BCL2L11	AC002550.2	0.428385	1.56093e-22	postive		TNF	DTNB-AS1	0.310003	5.39181e-12	postive
HELLS	MAP3K5-AS1	0.54993	9.74579e-39	postive		BCL2L2	LINC00702	0.337717	4.40917e-14	postive		SCAF11	AL645941.1	0.317626	1.50947e-12	postive
PTGS2	CERNA1	0.549898	9.86259e-39	postive		BCL2L11	AL132642.1	0.361275	4.97906e-16	postive		SCAF11	AC090229.1	0.38887	1.59103e-18	postive
ZEB1	HLCS-IT1	0.549769	1.03493e-38	postive		BCL2L2	AL132642.1	0.338959	3.5133e-14	postive		SCAF11	WASHC5-AS1	0.562483	8.14514e-41	postive
PRKAA2	NCOA7-AS1	0.549435	1.17171e-38	postive		BAD	AC004223.2	-0.387345	2.21723e-18	negative		SCAF11	AC108681.1	0.329694	1.86506e-13	postive
HELLS	AC010536.2	0.549416	1.18008e-38	postive		BCL2A1	AC004223.2	0.315348	2.21666e-12	postive		IL1B	AL354989.1	0.46817	3.86321e-27	postive
ZEB1	AC020891.3	0.549307	1.22897e-38	postive		BCL2L11	AC004223.2	0.480706	1.01289e-28	postive		SCAF11	AL354989.1	0.704663	3.36462e-72	postive
ZEB1	AC005838.3	0.549301	1.23188e-38	postive		BCL2L12	AC004223.2	-0.352953	2.53328e-15	negative		PLCG1	AC254629.1	0.412383	7.60339e-21	postive
LOX	AC009093.1	0.549151	1.30243e-38	postive		BAD	AC211476.4	-0.366233	1.84601e-16	negative		IL1B	AL157394.1	0.497307	6.43136e-31	postive
HELLS	CHRM3-AS2	0.548931	1.41369e-38	postive		BCL2L11	AC211476.4	0.468909	3.12927e-27	postive		SCAF11	AL157394.1	0.655916	1.6415e-59	postive
PTGS2	AL513327.1	0.548922	1.41856e-38	postive		BCL2L12	AC211476.4	-0.327646	2.67719e-13	negative		IL1B	AC087286.2	0.68236	4.36356e-66	postive
ZEB1	LAMTOR5-AS1	0.548757	1.50803e-38	postive		BAD	AC013403.2	-0.359191	7.51691e-16	negative		SCAF11	AC087286.2	0.676399	1.52083e-64	postive
ZEB1	AC007314.1	0.548639	1.57554e-38	postive		BCL2L11	AC013403.2	0.415867	3.32064e-21	postive		IL1B	AC090948.1	0.371991	5.70609e-17	postive
HELLS	AC027682.1	0.548614	1.59057e-38	postive		BCL2L12	AC013403.2	-0.325893	3.64009e-13	negative		SCAF11	AC090948.1	0.700646	4.67788e-71	postive
ZEB1	AC118344.1	0.548524	1.64441e-38	postive		BCL2A1	AC112721.1	0.464029	1.2448e-26	postive		NOD2	AC012501.2	0.368762	1.10538e-16	postive
ZEB1	AC005034.4	0.548487	1.66753e-38	postive		BCL2L11	AC112721.1	0.414232	4.90492e-21	postive		IL1B	AC073592.1	0.364237	2.75781e-16	postive
ZEB1	AC008114.1	0.548359	1.74839e-38	postive		BCL2L12	AC112721.1	-0.302493	1.8242e-11	negative		SCAF11	AC073592.1	0.533911	3.27976e-36	postive
HELLS	PSPC1-AS2	0.54811	1.91729e-38	postive		BAD	SNHG26	-0.304101	1.4093e-11	negative		SCAF11	LRRC8C-DT	0.616972	5.9385e-51	postive
ZEB1	AC020704.1	0.548088	1.93305e-38	postive		BCL2A1	SNHG26	0.432023	6.2649e-23	postive		IL1B	AC007285.1	0.370051	8.49604e-17	postive
PTGS2	AC096708.2	0.548006	1.9928e-38	postive		BCL2L11	SNHG26	0.494498	1.54382e-30	postive		SCAF11	AC007285.1	0.636013	5.53237e-55	postive
ZEB1	AC078846.1	0.547995	2.00121e-38	postive		BAD	AC018695.4	-0.38304	5.60893e-18	negative		GSDMD	AC105339.2	-0.319308	1.13415e-12	negative
LOX	HECW2-AS1	0.547914	2.0618e-38	postive		BCL2L11	AC018695.4	0.498567	4.3309e-31	postive		IL1B	AC105339.2	0.357386	1.07135e-15	postive
HELLS	AP005899.1	0.547886	2.08392e-38	postive		BCL2L12	AC018695.4	-0.323893	5.15534e-13	negative		SCAF11	AC105339.2	0.771329	1.76232e-94	postive
PTGS2	AC009093.1	0.547768	2.17707e-38	postive		BCL2L2	AC018695.4	0.31328	3.13334e-12	postive		GSDMD	AP001527.2	0.307328	8.35692e-12	postive
HELLS	AC002044.1	0.547722	2.21445e-38	postive		BCL2L2	GLIDR	0.353259	2.38821e-15	postive		SCAF11	AC036108.3	0.563141	6.30446e-41	postive
ZEB1	AL596202.1	0.547644	2.27881e-38	postive		BAD	AC022400.5	-0.39076	1.05174e-18	negative		SCAF11	LINC01126	0.498524	4.39038e-31	postive
ZEB1	AC073333.1	0.547593	2.32251e-38	postive		BCL2L11	AC022400.5	0.35833	8.90277e-16	postive		SCAF11	CCAT2	0.464124	1.21193e-26	postive
HELLS	AL450344.3	0.547568	2.3444e-38	postive		BCL2L12	AC022400.5	-0.313751	2.89622e-12	negative		GSDMD	AL390195.3	-0.324172	4.91221e-13	negative
HELLS	AL157395.1	0.547562	2.34906e-38	postive		BCL2L11	AC002563.1	0.468716	3.30637e-27	postive		SCAF11	AL390195.3	0.653615	5.70199e-59	postive
LOX	AC087286.2	0.547505	2.3991e-38	postive		BAD	MRTFA-AS1	-0.371584	6.20434e-17	negative		PLCG1	AC106886.2	0.344407	1.28218e-14	postive
ZEB1	PEF1-AS1	0.54745	2.44851e-38	postive		BCL2A1	MRTFA-AS1	0.402604	7.39066e-20	postive		PYCARD	USP46-AS1	-0.307603	7.99066e-12	negative
PRKAA2	AC009269.5	0.547324	2.56588e-38	postive		BCL2L11	MRTFA-AS1	0.527476	3.11485e-35	postive		SCAF11	USP46-AS1	0.539811	3.98845e-37	postive
ZEB1	LINC00571	0.547268	2.61899e-38	postive		BCL2L12	MRTFA-AS1	-0.342063	1.98299e-14	negative		SCAF11	SUCLG2-AS1	0.521721	2.23957e-34	postive
ZEB1	Z82243.1	0.547092	2.79567e-38	postive		BCL2L2	LINC01711	0.346234	9.10224e-15	postive		SCAF11	PLS1-AS1	0.69149	1.6023e-68	postive
ZEB1	LINC02042	0.547057	2.83208e-38	postive		BMF	LINC01711	0.355664	1.49902e-15	postive		IL1B	AC026470.2	0.552754	3.3801e-39	postive
HELLS	AC137932.3	0.547039	2.85052e-38	postive		BAD	AL121845.4	-0.33795	4.22525e-14	negative		SCAF11	AC026470.2	0.671332	2.91604e-63	postive
PRKAA2	AP005131.7	0.546958	2.93717e-38	postive		BCL2L11	AL121845.4	0.521535	2.38604e-34	postive		IL1B	AP005131.1	0.36916	1.01922e-16	postive
HELLS	AL050320.1	0.546835	3.07397e-38	postive		BCL2L12	AL121845.4	-0.309517	5.84022e-12	negative		SCAF11	AP005131.1	0.694965	1.79471e-69	postive
HELLS	AC024060.2	0.546716	3.21188e-38	postive		BAD	AC025569.1	-0.322359	6.72123e-13	negative		SCAF11	CFTR-AS1	0.585997	5.90372e-45	postive
PRKAA2	Z99289.2	0.54668	3.25513e-38	postive		BCL2A1	AC025569.1	0.443628	3.1601e-24	postive		TNF	LINC01679	0.389634	4.78368e-15	postive
HELLS	AC009148.1	0.54652	3.45252e-38	postive		BCL2L11	AC025569.1	0.478743	1.80935e-28	postive		PLCG1	LINC01001	0.353082	2.47128e-15	postive
CRYAB	AL161785.1	0.546486	3.49595e-38	postive		BCL2L12	AC025569.1	-0.312756	3.41859e-12	negative		IL1B	AP000695.1	0.332099	1.21579e-13	postive
PTGS2	MIR133A1HG	0.546312	3.72733e-38	postive		BAK1	AC078860.2	-0.318319	1.34207e-12	negative		IL1B	AC104695.4	0.533276	4.10359e-36	postive
HELLS	AL121906.1	0.546237	3.83183e-38	postive		TNFRSF1A	AC078860.2	-0.336401	5.60166e-14	negative		SCAF11	AC104695.4	0.479853	1.30396e-28	postive
HELLS	AC005332.7	0.546201	3.88345e-38	postive		BAD	AC137932.2	-0.345236	1.09793e-14	negative		PLCG1	AC008764.6	0.355331	1.59926e-15	postive
ZEB1	AC010655.2	0.54619	3.89964e-38	postive		BCL2L11	AC137932.2	0.550463	7.98677e-39	postive		SCAF11	AC018845.3	0.346671	8.38485e-15	postive
HELLS	AGAP1-IT1	0.546176	3.91898e-38	postive		BCL2L12	AC137932.2	-0.341517	2.19408e-14	negative		SCAF11	AL137186.2	0.39923	5.16629e-15	postive
PTGS2	AL132989.2	0.546141	3.97007e-38	postive		BAD	LINC02100	-0.325412	3.95881e-13	negative		SCAF11	AL365295.1	0.492418	2.93731e-30	postive
MYC	VPS9D1-AS1	0.546116	4.00671e-38	postive		BCL2L11	LINC02100	0.437329	1.62208e-23	postive		SCAF11	AC034102.6	0.350056	4.41404e-15	postive
HELLS	AC084782.3	0.545909	4.32497e-38	postive		CASP10	LINC02100	0.333391	9.64672e-14	postive		SCAF11	AL138921.1	0.549813	1.01785e-38	postive
HELLS	AC019330.1	0.545588	4.86559e-38	postive		BAD	AC092171.1	-0.350183	4.30845e-15	negative		IL1B	EPN2-AS1	0.407897	2.17848e-20	postive
PTGS2	AC073487.1	0.545487	5.04949e-38	postive		BCL2L11	AC092171.1	0.474201	6.82748e-28	postive		SCAF11	EPN2-AS1	0.632294	3.56725e-54	postive
EPAS1	AL109741.1	0.545481	5.06161e-38	postive		BCL2L12	AC092171.1	-0.36112	5.13452e-16	negative		SCAF11	AC068189.1	0.573785	9.17996e-43	postive
HELLS	IQCH-AS1	0.545479	5.065e-38	postive		BAD	EGOT	-0.336894	5.12203e-14	negative		SCAF11	AC004801.6	0.374014	3.75563e-17	postive
ZEB1	AC098869.2	0.545287	5.43629e-38	postive		BCL2L11	EGOT	0.495867	1.00878e-30	postive		GSDMD	AC009318.2	-0.315437	2.18364e-12	negative
HELLS	CASC15	0.545227	5.55689e-38	postive		BCL2L12	EGOT	-0.345993	9.52535e-15	negative		SCAF11	AC009318.2	0.733515	5.15669e-81	postive
ZEB1	AC055822.1	0.545161	5.69187e-38	postive		BCL2A1	U62317.4	0.551554	3.31509e-15	postive		PLCG1	MNX1-AS2	0.333189	1.0002e-13	postive
HELLS	LINC00513	0.545126	5.76719e-38	postive		BAD	AC073529.1	-0.33884	3.59089e-14	negative		GSDMD	AP006621.1	0.382955	5.71151e-18	postive
HELLS	AC009262.1	0.545109	5.80336e-38	postive		BCL2L11	AC073529.1	0.359765	6.71279e-16	postive		SCAF11	AC093726.1	0.556369	8.58977e-40	postive
ZEB1	CASC2	0.545075	5.87556e-38	postive		TNFRSF1A	AC073529.1	-0.300957	2.33074e-11	negative		IL1B	RHOA-IT1	0.505721	4.44622e-32	postive
ZEB1	CCDC18-AS1	0.545002	6.03475e-38	postive		BAD	ALKBH3-AS1	-0.367133	1.53872e-16	negative		SCAF11	RHOA-IT1	0.669185	1.00168e-62	postive
HELLS	AC009054.1	0.54485	6.38152e-38	postive		BCL2L11	ALKBH3-AS1	0.46919	2.88823e-27	postive		IL1B	AC110813.1	0.341658	2.13766e-14	postive
PRKAA2	AC138207.4	0.544836	6.41478e-38	postive		BCL2L12	ALKBH3-AS1	-0.329531	1.91968e-13	negative		SCAF11	AC110813.1	0.700668	4.61085e-71	postive
HELLS	AC012467.2	0.544826	6.43689e-38	postive		BAD	AC124312.2	-0.338805	3.61393e-14	negative		NOD2	LINC02538	0.300122	2.6613e-11	postive
HELLS	AC083900.1	0.544663	6.83376e-38	postive		BCL2L11	AC124312.2	0.379474	1.19746e-17	postive		PLCG1	LINC02538	0.461687	2.39551e-26	postive
HELLS	AC025175.1	0.544632	6.91219e-38	postive		BCL2L12	AC124312.2	-0.327344	2.82314e-13	negative		IL1B	MIR155HG	0.333709	9.11014e-14	postive
HELLS	SYNJ2-IT1	0.544565	7.08356e-38	postive		BCL2A1	DARS-AS1	0.356418	1.29424e-15	postive		SCAF11	MIR155HG	0.62514	1.19898e-52	postive
ZEB1	AC092436.3	0.544543	7.14195e-38	postive		BCL2L11	DARS-AS1	0.47169	1.41092e-27	postive		SCAF11	AC021739.3	0.42889	1.37577e-22	postive
ZEB1	Z97200.1	0.544424	7.45936e-38	postive		FAS	DARS-AS1	0.31154	4.18332e-12	postive		IL1B	AC020978.7	0.344719	1.20937e-14	postive
HELLS	CERNA1	0.544382	7.57641e-38	postive		BAD	Z93022.1	-0.316712	1.76171e-12	negative		SCAF11	AC020978.7	0.682435	4.17025e-66	postive
HELLS	C2orf27A	0.544363	7.62929e-38	postive		BCL2L11	Z93022.1	0.399327	1.55759e-19	postive		IL1B	MIR4435-2HG	0.376483	2.24565e-17	postive
PTGS2	AL442125.1	0.544328	7.72666e-38	postive		BAD	AC068790.5	-0.354995	1.7071e-15	negative		CASP6	AC234582.1	-0.333672	9.17108e-14	negative
ZEB1	AC004076.2	0.54425	7.9489e-38	postive		BCL2L11	AC068790.5	0.478794	1.78251e-28	postive		IL1B	AP002812.3	0.30773	7.82608e-12	postive
HELLS	SEPSECS-AS1	0.544119	8.34057e-38	postive		BCL2L12	AC068790.5	-0.348636	5.78227e-15	negative		SCAF11	AP002812.3	0.638287	1.74763e-55	postive
ZEB1	MIS18A-AS1	0.544104	8.3876e-38	postive		BCL2A1	MIR223HG	0.798235	9.33571e-106	postive		TNF	LINC02611	0.334385	8.06721e-14	postive
ZEB1	AC113361.1	0.544098	8.40543e-38	postive		BCL2L11	MIR223HG	0.446629	1.43272e-24	postive		GSDMD	AC245060.5	-0.30948	5.87609e-12	negative
ZEB1	AC008050.1	0.543762	9.50191e-38	postive		FAS	MIR223HG	0.309342	6.0104e-12	postive		IL1B	AC245060.5	0.365559	2.11461e-16	postive
PRKAA2	AC040934.1	0.543708	9.69259e-38	postive		TNFRSF10C	MIR223HG	0.344693	1.21546e-14	postive		SCAF11	AC245060.5	0.572355	1.63501e-42	postive
HELLS	AC092301.1	0.5436	1.00823e-37	postive		BCL2L11	AC011700.1	0.339151	3.3921e-14	postive		IL1B	AL157392.4	0.399804	1.39815e-19	postive
ZEB1	AC026771.1	0.543576	1.01726e-37	postive		BAD	ODF2-AS1	-0.324257	4.83979e-13	negative		SCAF11	AL157392.4	0.640143	6.77304e-56	postive
ZEB1	AC022306.2	0.543519	1.03841e-37	postive		BCL2L11	ODF2-AS1	0.430051	1.02898e-22	postive		IL1B	CYTOR	0.301229	2.23215e-11	postive
HELLS	AL442128.2	0.543315	1.11899e-37	postive		BCL2L12	ODF2-AS1	-0.305601	1.10621e-11	negative		TNF	CYTOR	0.307974	7.52078e-12	postive
HELLS	AC116913.1	0.54331	1.12082e-37	postive		BAD	RPS6KA2-IT1	-0.338355	3.92426e-14	negative		PLCG1	AL031600.1	0.527631	2.95201e-35	postive
ZEB1	FSIP2-AS1	0.543244	1.14824e-37	postive		BCL2A1	RPS6KA2-IT1	0.372278	5.37772e-17	postive		IL1B	AC004253.1	0.322994	6.02332e-13	postive
ZEB1	AL355001.1	0.543049	1.23266e-37	postive		BCL2L11	RPS6KA2-IT1	0.487214	1.44036e-29	postive		SCAF11	AC004253.1	0.552079	4.35844e-39	postive
ZEB1	AC114763.1	0.543003	1.25386e-37	postive		BCL2L12	RPS6KA2-IT1	-0.3694	9.7047e-17	negative		IL1B	AL353593.2	0.699287	1.12792e-70	postive
HELLS	AP001469.2	0.542963	1.27193e-37	postive		BID	AL121832.2	0.315463	2.17431e-12	postive		SCAF11	AL353593.2	0.524238	9.49356e-35	postive
ZEB1	AC104984.3	0.542902	1.30054e-37	postive		FAS	AL121832.2	-0.339378	3.25356e-14	negative		IL1B	AL355075.2	0.462139	2.11206e-26	postive
ZEB1	AC108727.1	0.542818	1.34128e-37	postive		BAD	TH2LCRR	-0.370688	7.4574e-17	negative		SCAF11	AL355075.2	0.703338	8.05562e-72	postive
LOX	A2M-AS1	0.542635	1.43352e-37	postive		BCL2L11	TH2LCRR	0.519391	4.9248e-34	postive		CASP6	AC144831.1	-0.370053	8.49246e-17	negative
ZEB1	AL021707.7	0.542483	1.51513e-37	postive		BCL2L12	TH2LCRR	-0.343855	1.42132e-14	negative		IL1B	AC138393.3	0.331889	1.26236e-13	postive
HELLS	AC004988.1	0.542318	1.60874e-37	postive		CSE1L	AL031055.1	0.319424	1.11197e-12	postive		SCAF11	AC138393.3	0.660254	1.52181e-60	postive
CRYAB	LINC00987	0.542306	1.61605e-37	postive		BCL2L11	AC023825.2	0.457076	8.56846e-26	postive		GSDMD	AC084125.2	0.308252	7.18635e-12	postive
ZEB1	AL365295.1	0.542244	1.65255e-37	postive		CASP10	AC023825.2	0.321033	8.443e-13	postive		PLCG1	AC084125.2	0.416032	3.19266e-21	postive
ZEB1	Z68871.1	0.542205	1.67606e-37	postive		CSE1L	AC021218.1	0.30104	2.30042e-11	postive		IL1B	MALAT1	0.526001	5.18225e-35	postive
HELLS	AC055811.1	0.542064	1.76436e-37	postive		BID	AC011511.3	0.339644	3.09855e-14	postive		SCAF11	MALAT1	0.637651	2.41408e-55	postive
HELLS	AL137782.1	0.542059	1.76795e-37	postive		BCL2	AC021188.1	0.407818	2.21884e-20	postive		PLCG1	AC104564.3	0.323773	5.26385e-13	postive
ZEB1	LINC01050	0.541701	2.01326e-37	postive		BCL2L11	AC021188.1	0.431876	6.50081e-23	postive		PLCG1	AL357079.1	0.38774	2.03523e-18	postive
PTGS2	AC022001.2	0.541628	2.06748e-37	postive		BCL2L12	ATP2A1-AS1	0.3126	3.50854e-12	postive		IL1B	AC007663.4	0.380474	9.68932e-18	postive
ZEB1	SNHG26	0.541529	2.14297e-37	postive		RIPK1	ATP2A1-AS1	-0.304727	1.27404e-11	negative		SCAF11	AC007663.4	0.555816	1.0604e-39	postive
HELLS	AC097641.2	0.541469	2.18963e-37	postive		BCL2L1	AC135388.1	0.300845	2.37257e-11	postive		GSDMD	AC093227.1	-0.3345	7.90124e-14	negative
ZEB1	AC012313.5	0.541394	2.25039e-37	postive		BCL2L11	LINC02362	0.402657	7.30082e-20	postive		SCAF11	AC093227.1	0.626798	5.3526e-53	postive
LOX	AL031651.2	0.540905	2.68624e-37	postive		CASP10	LINC02362	0.32689	3.05716e-13	postive		SCAF11	LINC00654	0.330982	1.48374e-13	postive
ZEB1	AC004241.4	0.540897	2.69363e-37	postive		BCL2A1	AC007278.1	0.545146	5.72401e-38	postive		SCAF11	AC068888.1	0.503582	8.82998e-32	postive
ZEB1	AL121782.1	0.540753	2.83852e-37	postive		BCL2L11	AC007278.1	0.441285	5.83025e-24	postive		SCAF11	AL049539.1	0.679024	3.21595e-65	postive
ZEB1	AP001434.1	0.540745	2.84665e-37	postive		BAD	CASC15	-0.345439	1.05687e-14	negative		SCAF11	AL928654.2	0.324063	5.00574e-13	postive
HELLS	AL358072.1	0.540498	3.11228e-37	postive		BAK1	CASC15	-0.311601	4.14103e-12	negative		SCAF11	AC137932.3	0.471905	1.32624e-27	postive
PRKAA2	KIF26B-AS1	0.540467	3.14751e-37	postive		BCL2L11	CASC15	0.391459	9.01885e-19	postive		TNF	AC093627.4	0.311023	4.55678e-12	postive
ZEB1	SPON1-AS1	0.540454	3.16269e-37	postive		BCL2L12	CASC15	-0.343701	1.46271e-14	negative		SCAF11	AC090589.3	0.478297	2.06291e-28	postive
PTGS2	PEF1-AS1	0.540376	3.25271e-37	postive		BAD	AL031775.2	-0.332414	1.1491e-13	negative		SCAF11	LINC02762	0.482823	5.39441e-29	postive
PTGS2	AC104695.4	0.540188	3.48087e-37	postive		BCL2A1	AL031775.2	0.312778	3.40615e-12	postive		SCAF11	LURAP1L-AS1	0.663821	2.08868e-61	postive
PTGS2	AC005632.3	0.539994	3.73327e-37	postive		BCL2L11	AL031775.2	0.490213	5.78065e-30	postive		SCAF11	AL138962.1	0.485177	2.66399e-29	postive
ZEB1	AC020915.1	0.539908	3.85201e-37	postive		BCL2L12	AL031775.2	-0.325179	4.12285e-13	negative		SCAF11	AC006504.1	0.555629	1.13853e-39	postive
PTGS2	AC114781.2	0.539814	3.98482e-37	postive		BCL2L11	AC008035.1	0.303348	1.59071e-11	postive		IL1B	AC018682.1	0.673626	7.71329e-64	postive
CRYAB	HAND2-AS1	0.539763	4.05813e-37	postive		BAD	AOAH-IT1	-0.333744	9.05261e-14	negative		SCAF11	AC018682.1	0.559647	2.44434e-40	postive
HELLS	AC078777.1	0.539545	4.3897e-37	postive		BCL2L11	AOAH-IT1	0.372349	5.29963e-17	postive		IL1B	AL157838.1	0.364098	2.83615e-16	postive
PRKAA2	AC007684.2	0.539419	4.59315e-37	postive		BCL2L12	AOAH-IT1	-0.314121	2.72279e-12	negative		SCAF11	AL157838.1	0.634954	9.4289e-55	postive
HELLS	AL121929.3	0.539412	4.60565e-37	postive		BAD	AC092828.1	-0.397643	2.27701e-19	negative		SCAF11	AC007637.1	0.541888	1.88103e-37	postive
ZEB1	AC098484.1	0.539366	4.6827e-37	postive		BCL2L11	AC092828.1	0.486313	1.89195e-29	postive		IL1B	AC129510.2	0.401781	8.92008e-20	postive
LOX	AC108463.2	0.539331	4.74184e-37	postive		BCL2L12	AC092828.1	-0.357517	1.04416e-15	negative		SCAF11	AC129510.2	0.554615	1.67362e-39	postive
ZEB1	AL442067.2	0.539284	4.82255e-37	postive		BCL2L11	AL161729.2	0.378646	1.42599e-17	postive		SCAF11	AC019131.2	0.606834	6.44672e-49	postive
ZEB1	AP000593.3	0.53928	4.82923e-37	postive		BAD	AP000763.3	-0.346457	8.72826e-15	negative		IL1B	AL512328.1	0.526514	4.34274e-35	postive
LOX	AL139393.3	0.539261	4.86208e-37	postive		BCL2A1	AP000763.3	0.447011	1.29452e-24	postive		SCAF11	AL512328.1	0.398082	2.06268e-19	postive
LOX	AC004846.1	0.539253	4.87727e-37	postive		BCL2L11	AP000763.3	0.537475	9.23077e-37	postive		IL1B	AC020900.1	0.465796	7.57038e-27	postive
EPAS1	AP001189.3	0.53918	5.00599e-37	postive		BCL2L12	AP000763.3	-0.320776	8.82409e-13	negative		SCAF11	AC020900.1	0.726645	8.19524e-79	postive
HELLS	MORF4L2-AS1	0.538993	5.35555e-37	postive		BCL2L11	AC145285.2	0.361679	4.59551e-16	postive		TNF	AC134312.5	0.329803	1.82943e-13	postive
PRKAA2	AC012447.1	0.538722	5.90318e-37	postive		BCL2L12	AC145285.2	-0.315225	2.26293e-12	negative		IL1B	AP001793.1	0.505298	5.09428e-32	postive
PRKAA2	CASC2	0.538683	5.98585e-37	postive		CSE1L	AL023803.2	0.377818	1.69745e-17	postive		SCAF11	AP001793.1	0.655546	2.00684e-59	postive
ZEB1	LINC01138	0.53861	6.14498e-37	postive		BCL2L12	SNHG30	0.311991	3.8823e-12	postive		IL1B	AC005726.2	0.325019	4.23963e-13	postive
HELLS	ZNF32-AS2	0.53857	6.23457e-37	postive		CSE1L	SNHG30	0.327919	2.55161e-13	postive		SCAF11	AC005726.2	0.72892	1.5562e-79	postive
HELLS	GAS8-AS1	0.538553	6.27135e-37	postive		RIPK1	SNHG30	-0.312964	3.30239e-12	negative		CASP6	AC105020.1	-0.323875	5.17184e-13	negative
ZEB1	BX322234.1	0.538437	6.5397e-37	postive		BCL2L11	AP003119.3	0.383867	4.6985e-18	postive		IL1B	AC105020.1	0.309423	5.93085e-12	postive
ZEB1	AC005021.1	0.538355	6.7342e-37	postive		BAD	AC005072.1	-0.382558	6.21801e-18	negative		SCAF11	AC105020.1	0.33179	1.28488e-13	postive
HELLS	AC009120.3	0.538294	6.88267e-37	postive		BCL2A1	AC005072.1	0.31845	1.31253e-12	postive		PLCG1	AC018653.3	0.330404	1.64448e-13	postive
ZEB1	LINC01235	0.538057	7.49308e-37	postive		BCL2L11	AC005072.1	0.523686	1.14667e-34	postive		SCAF11	AC018653.3	0.401248	1.00701e-19	postive
ZEB1	AC004067.1	0.538046	7.52253e-37	postive		BCL2L12	AC005072.1	-0.356291	1.32667e-15	negative		SCAF11	AC004943.3	0.61662	7.00675e-51	postive
ZEB1	AC107884.1	0.537844	8.08747e-37	postive		BCL2L11	AC074050.4	0.449334	6.97259e-25	postive		SCAF11	AC003956.1	0.355095	1.67427e-15	postive
ZEB1	AC093157.2	0.537809	8.19108e-37	postive		BAD	AC040169.3	-0.339404	3.23783e-14	negative		IL1B	AC027097.2	0.473277	8.92481e-28	postive
ZEB1	SHANK2-AS2	0.537731	8.42321e-37	postive		BCL2L11	AC040169.3	0.468327	3.69449e-27	postive		SCAF11	AC027097.2	0.646959	1.97061e-57	postive
ZEB1	FLNB-AS1	0.537652	8.66334e-37	postive		BAD	AC027279.1	-0.310042	5.35703e-12	negative		GSDMD	AC009065.5	0.321173	8.24379e-13	postive
PRKAA2	AC099811.5	0.537649	8.67338e-37	postive		BCL2L11	AC027279.1	0.400316	1.24486e-19	postive		PYCARD	AC009065.5	0.461672	2.40609e-26	postive
ACSL4	OIP5-AS1	0.537544	9.00529e-37	postive		BAD	DCUN1D2-AS	-0.313025	3.26898e-12	negative		SCAF11	AC007785.3	0.429731	1.11492e-22	postive
ZEB1	AC006111.2	0.537483	9.20335e-37	postive		BCL2L11	DCUN1D2-AS	0.399047	1.65903e-19	postive		IL1B	AL355916.2	0.34368	1.46851e-14	postive
PTGS2	LINC01943	0.537307	9.80264e-37	postive		BAD	AL157932.1	-0.38626	2.80531e-18	negative		SCAF11	AL355916.2	0.605617	1.11894e-48	postive
PTGS2	KLF7-IT1	0.537301	9.82325e-37	postive		BAK1	AL157932.1	-0.301027	2.30509e-11	negative		IL1B	AC091182.1	0.502364	1.30236e-31	postive
HELLS	BX284668.6	0.537283	9.88639e-37	postive		BCL2L11	AL157932.1	0.451466	3.93555e-25	postive		SCAF11	LINC00894	0.598033	3.29741e-47	postive
PRKAA2	AC099811.1	0.537161	1.03275e-36	postive		BCL2L12	AL157932.1	-0.36739	1.46071e-16	negative		SCAF11	AL049838.1	0.378627	1.43161e-17	postive
ZEB1	AC104791.1	0.537072	1.06613e-36	postive		TNFRSF1A	AL157932.1	-0.306162	1.01015e-11	negative		GSDMD	AC112220.2	-0.311623	4.12612e-12	negative
EGLN1	OIP5-AS1	0.537034	1.08071e-36	postive		BCL2L2	AC027319.1	-0.313478	3.03156e-12	negative		SCAF11	AC112220.2	0.428492	1.51972e-22	postive
PRKAA2	AL035530.2	0.537026	1.08404e-36	postive		BCL2L11	AL024507.3	0.314784	2.43648e-12	postive		SCAF11	AC079148.1	0.477385	2.69731e-28	postive
CRYAB	AL109741.1	0.536886	1.13938e-36	postive		BCL2L11	AC079336.5	0.400754	1.12686e-19	postive		SCAF11	WDFY3-AS2	0.490865	4.73504e-30	postive
ZEB1	AC007823.1	0.536804	1.17313e-36	postive		BCL2L2	AC079336.5	0.310871	4.67236e-12	postive		SCAF11	AC046134.2	0.435542	2.56364e-23	postive
PRKAA2	SOS1-IT1	0.536798	1.17571e-36	postive		BAD	AC004918.5	-0.398633	1.82196e-19	negative		PLCG1	AP006621.4	0.330052	1.75053e-13	postive
HELLS	AC007431.1	0.53673	1.20469e-36	postive		BCL2L11	AC004918.5	0.500558	2.31106e-31	postive		IL1B	AF131215.4	0.301267	2.21859e-11	postive
HELLS	AL135902.2	0.536673	1.22955e-36	postive		BCL2L12	AC004918.5	-0.406643	2.91516e-20	negative		SCAF11	AF131215.4	0.500758	2.1692e-31	postive
ZEB1	AC129510.2	0.536669	1.23131e-36	postive		BCL2L11	AC121761.1	0.301374	2.18097e-11	postive		SCAF11	ALG13-AS1	0.686831	2.87488e-67	postive
HELLS	AL450998.3	0.536614	1.25569e-36	postive		CSE1L	AC007255.1	0.371589	6.1974e-17	postive		IL1B	AC011595.1	0.693075	5.92534e-69	postive
HELLS	AC133644.1	0.536557	1.28119e-36	postive		BAD	LAMTOR5-AS1	-0.370582	7.62158e-17	negative		SCAF11	AC011595.1	0.571431	2.37011e-42	postive
LOX	AC113346.1	0.53636	1.37488e-36	postive		BCL2L11	LAMTOR5-AS1	0.466781	5.72962e-27	postive		SCAF11	SLC16A1-AS1	0.511267	7.33135e-33	postive
PRKAA2	AC130371.1	0.536317	1.39602e-36	postive		BCL2L12	LAMTOR5-AS1	-0.379849	1.10604e-17	negative		SCAF11	AC141002.1	0.521147	2.72101e-34	postive
ZEB1	AL354892.3	0.536306	1.40148e-36	postive		TNFRSF1A	LAMTOR5-AS1	-0.307303	8.39001e-12	negative		SCAF11	LINC01909	0.419874	1.26533e-21	postive
HELLS	OVOL1-AS1	0.536289	1.40993e-36	postive		BAD	AC015727.1	-0.388655	1.66722e-18	negative		CASP6	PCED1B-AS1	-0.313215	3.1673e-12	negative
PTGS2	MYOSLID	0.536218	1.44601e-36	postive		BCL2L11	AC015727.1	0.433144	4.71805e-23	postive		IL1B	PCED1B-AS1	0.364144	2.80994e-16	postive
ZEB1	AC103591.3	0.536176	1.46804e-36	postive		BCL2L12	AC015727.1	-0.348042	6.47168e-15	negative		TNF	PCED1B-AS1	0.450326	5.34683e-25	postive
PRKAA2	AP000350.6	0.5361	1.50801e-36	postive		BCL2A1	AC019254.1	0.482599	5.76781e-29	postive		PLCG1	AC026336.2	0.329654	1.87827e-13	postive
ZEB1	MIR17HG	0.536032	1.54485e-36	postive		BCL2L11	AC019254.1	0.465096	9.22195e-27	postive		SCAF11	AC090527.4	0.360453	5.85969e-16	postive
HELLS	AC009404.1	0.536018	1.55266e-36	postive		BAD	AF230666.1	-0.35324	2.39734e-15	negative		SCAF11	AC079336.2	0.596977	5.24303e-47	postive
PTGS2	PLCG1-AS1	0.535994	1.56627e-36	postive		BCL2L11	AF230666.1	0.396937	2.66864e-19	postive		GSDMD	AC092910.3	-0.300226	2.61785e-11	negative
HELLS	AL158212.2	0.535916	1.6101e-36	postive		BCL2L12	AF230666.1	-0.330118	1.73016e-13	negative		SCAF11	AC092910.3	0.518657	6.30585e-34	postive
ZEB1	RPS6KA2-IT1	0.535869	1.63725e-36	postive		BCL2L11	AC116913.1	0.441429	5.61518e-24	postive		IL1B	LINC01943	0.597471	4.22162e-47	postive
ZEB1	AC021851.1	0.535849	1.64915e-36	postive		BCL2L2	AC116913.1	0.327552	2.72173e-13	postive		SCAF11	LINC01943	0.466808	5.687e-27	postive
HELLS	LINC00628	0.535825	1.66328e-36	postive		BAK1	ZNF252P-AS1	-0.3469	8.03046e-15	negative		TNF	LINC01943	0.375937	2.51715e-17	postive
PTGS2	Z99289.2	0.535801	1.67779e-36	postive		BCL2L11	ZNF252P-AS1	0.30918	6.17318e-12	postive		SCAF11	IQCH-AS1	0.573766	9.25137e-43	postive
LOX	MIR4435-2HG	0.53577	1.69613e-36	postive		BAD	AP006259.1	-0.341675	2.13065e-14	negative		SCAF11	AL110505.1	0.329839	1.81775e-13	postive
LOX	LINC01705	0.535622	1.78795e-36	postive		BCL2A1	AP006259.1	0.514559	2.47581e-33	postive		SCAF11	AL355483.2	0.449706	6.31248e-25	postive
HELLS	ODF2-AS1	0.535621	1.78831e-36	postive		BCL2L11	AP006259.1	0.497565	5.93335e-31	postive		IL1B	ZBTB20-AS5	0.368681	1.12369e-16	postive
HELLS	AC020594.1	0.535533	1.84497e-36	postive		BCL2L12	AP006259.1	-0.309181	6.17136e-12	negative		SCAF11	ZBTB20-AS5	0.67202	1.95991e-63	postive
ZEB1	AC025280.1	0.535527	1.84953e-36	postive		BAD	Z68871.1	-0.400859	1.10026e-19	negative		SCAF11	ZEB1-AS1	0.381373	8.00474e-18	postive
PTGS2	AC090825.1	0.535475	1.88347e-36	postive		BCL2L11	Z68871.1	0.371764	5.97815e-17	postive		IL1B	AC009032.1	0.353259	2.38829e-15	postive
HELLS	AC104785.1	0.535475	1.88378e-36	postive		BCL2L12	Z68871.1	-0.391369	9.1994e-19	negative		SCAF11	AC009032.1	0.643045	1.51937e-56	postive
HELLS	C1orf147	0.535441	1.90646e-36	postive		TNFRSF1A	Z68871.1	-0.337365	4.70099e-14	negative		SCAF11	AC005674.2	0.557401	5.79234e-40	postive
ZEB1	AC012676.3	0.535384	1.94568e-36	postive		BCL2L11	TPT1-AS1	0.340251	2.77133e-14	postive		SCAF11	AL031716.1	0.489446	7.30768e-30	postive
PTGS2	AC107308.1	0.535297	2.0068e-36	postive		BCL2L12	TPT1-AS1	-0.31614	1.94011e-12	negative		IL1B	AC021087.3	0.347479	7.19906e-15	postive
PTGS2	MKNK1-AS1	0.535162	2.1054e-36	postive		BAD	SLC7A11-AS1	-0.322196	6.91325e-13	negative		SCAF11	AC021087.3	0.513908	3.07222e-33	postive
HELLS	AL645568.1	0.535133	2.12705e-36	postive		BCL2A1	SLC7A11-AS1	0.350431	4.10958e-15	postive		SCAF11	AC016831.1	0.697471	3.62858e-70	postive
HELLS	DSG2-AS1	0.53506	2.18317e-36	postive		BCL2L11	SLC7A11-AS1	0.425365	3.30209e-22	postive		IL1B	ACTA2-AS1	0.332393	1.15356e-13	postive
HELLS	AL353801.1	0.535046	2.19396e-36	postive		BCL2L11	AC106820.3	0.394058	5.07464e-19	postive		SCAF11	ACTA2-AS1	0.528172	2.44742e-35	postive
ZEB1	ALOX12-AS1	0.534979	2.24616e-36	postive		BCL2L12	AC011451.1	-0.341622	2.15167e-14	negative		SCAF11	MIS18A-AS1	0.598432	2.76536e-47	postive
HELLS	LINC01814	0.534925	2.2904e-36	postive		BID	AC011451.1	-0.347648	6.97293e-15	negative		SCAF11	AC024896.1	0.325545	3.86793e-13	postive
PTGS2	AC012447.1	0.534873	2.3325e-36	postive		BCL2A1	AC107294.2	0.307113	8.65421e-12	postive		PYCARD	AL121829.2	0.33021	1.70191e-13	postive
PTGS2	AC008537.2	0.534803	2.39101e-36	postive		BAD	AL356599.1	-0.369811	8.92397e-17	negative		IL1B	AC007285.2	0.318465	1.30918e-12	postive
ZEB1	AC103746.1	0.53477	2.41921e-36	postive		BCL2L11	AL356599.1	0.47461	6.0626e-28	postive		SCAF11	AC007285.2	0.699714	8.55682e-71	postive
ZEB1	AC079336.2	0.53476	2.42789e-36	postive		BCL2L12	AL356599.1	-0.39366	5.54403e-19	negative		SCAF11	C2-AS1	0.532042	6.33844e-36	postive
PTGS2	ARNTL2-AS1	0.534697	2.48262e-36	postive		BAD	AC090519.2	-0.371112	6.83548e-17	negative		SCAF11	AC105137.2	0.356423	1.29313e-15	postive
ZEB1	PRC1-AS1	0.534595	2.57464e-36	postive		BCL2L11	AC090519.2	0.519229	5.2017e-34	postive		SCAF11	IGBP1-AS2	0.542176	1.69386e-37	postive
PTGS2	AC020661.3	0.534433	2.72636e-36	postive		BCL2L12	AC090519.2	-0.347185	7.61003e-15	negative		SCAF11	ZNF790-AS1	0.480895	9.57659e-29	postive
CD44	AL356215.1	0.534287	2.87114e-36	postive		TNFRSF1A	LINC01184	-0.34261	1.79185e-14	negative		IL1B	SPON1-AS1	0.382469	6.33753e-18	postive
PRKAA2	PCAT1	0.534238	2.92103e-36	postive		BAD	AC093535.1	-0.362387	3.9916e-16	negative		SCAF11	SPON1-AS1	0.45352	2.2598e-25	postive
PRNP	HAND2-AS1	0.534187	2.9742e-36	postive		BCL2L11	AC093535.1	0.477196	2.85035e-28	postive		PLCG1	AC005041.3	0.324797	4.40647e-13	postive
ZEB1	IGBP1-AS2	0.534098	3.06914e-36	postive		BCL2L12	AC093535.1	-0.357348	1.0792e-15	negative		IL1B	AC124283.3	0.308389	7.027e-12	postive
PRKAA2	PRR26	0.533962	3.22141e-36	postive		BAD	AC018557.2	-0.385679	3.18096e-18	negative		SCAF11	AC124283.3	0.691541	1.55201e-68	postive
HELLS	AL391684.1	0.533909	3.28156e-36	postive		BCL2A1	AC018557.2	0.344713	1.21092e-14	postive		SCAF11	AC243960.3	0.377781	1.71079e-17	postive
HELLS	AL359962.2	0.533905	3.28621e-36	postive		BCL2L11	AC018557.2	0.515884	1.59449e-33	postive		IL1B	RUSC1-AS1	0.304845	1.2501e-11	postive
ZEB1	C9orf147	0.53386	3.33921e-36	postive		BCL2L12	AC018557.2	-0.361885	4.41109e-16	negative		SCAF11	RUSC1-AS1	0.586851	4.11521e-45	postive
LOX	LINC01914	0.533827	3.37842e-36	postive		BCL2L11	LINC01480	0.352143	2.96057e-15	postive		SCAF11	AC124319.1	0.333836	8.90511e-14	postive
PRKAA2	AC093010.2	0.533699	3.53415e-36	postive		BAD	AL136985.2	-0.327887	2.56596e-13	negative		SCAF11	AC008635.2	0.408304	1.98119e-20	postive
LOX	AC006033.2	0.533552	3.72308e-36	postive		BCL2L11	AL136985.2	0.469988	2.29955e-27	postive		PLCG1	LINC01132	0.332736	1.08489e-13	postive
HELLS	FSIP2-AS1	0.533533	3.74871e-36	postive		BCL2L12	AL136985.2	-0.324109	4.96629e-13	negative		IL1B	AC103746.1	0.326885	3.06009e-13	postive
ZEB1	Z69666.1	0.533448	3.86194e-36	postive		BCL2L2	AL136985.2	0.302621	1.7874e-11	postive		SCAF11	AC103746.1	0.393665	5.53722e-19	postive
ZEB1	AC016722.2	0.533341	4.01167e-36	postive		BCL2L11	AC013468.1	0.407958	2.14786e-20	postive		IL1B	AC113143.1	0.367635	1.39007e-16	postive
ZEB1	RNF139-AS1	0.533313	4.0506e-36	postive		BCL2L11	AL109955.1	0.406665	2.90069e-20	postive		SCAF11	AC113143.1	0.667136	3.2202e-62	postive
HELLS	AL035530.2	0.533194	4.2252e-36	postive		BAD	DNM3OS	-0.312373	3.64348e-12	negative		NOD2	LINC00954	0.324936	4.30114e-13	postive
HELLS	AC073592.1	0.533147	4.29546e-36	postive		BCL2A1	DNM3OS	0.303267	1.61162e-11	postive		PLCG1	LINC00954	0.310587	4.89732e-12	postive
HELLS	AC025580.2	0.533112	4.34893e-36	postive		BCL2L11	DNM3OS	0.426224	2.67003e-22	postive		SCAF11	LINC00954	0.307976	7.51793e-12	postive
HELLS	SGMS1-AS1	0.532905	4.67811e-36	postive		BCL2L12	DNM3OS	-0.312916	3.32909e-12	negative		SCAF11	AL121772.2	0.545945	4.26685e-38	postive
PTGS2	AC005776.2	0.532843	4.78122e-36	postive		BAD	AC096708.2	-0.313077	3.24101e-12	negative		SCAF11	SPAG5-AS1	0.550385	8.22136e-39	postive
HELLS	AL353708.3	0.532824	4.81292e-36	postive		BCL2A1	AC096708.2	0.367793	1.34614e-16	postive		IL1B	ACBD3-AS1	0.438825	1.10321e-23	postive
LOX	PCAT19	0.532737	4.963e-36	postive		BCL2L11	AC096708.2	0.440588	6.98793e-24	postive		SCAF11	ACBD3-AS1	0.695916	9.80317e-70	postive
PTGS2	RHOA-IT1	0.532464	5.46437e-36	postive		BAD	AL357874.2	-0.32958	1.90321e-13	negative		SCAF11	AC007938.3	0.640984	4.40031e-56	postive
HELLS	AC024075.1	0.532333	5.72218e-36	postive		BCL2L11	AL357874.2	0.531013	9.09342e-36	postive		SCAF11	AC006449.3	0.438876	1.08886e-23	postive
HELLS	SH3BP5-AS1	0.532297	5.79486e-36	postive		BCL2L12	AL357874.2	-0.351535	3.32728e-15	negative		SCAF11	AC012065.3	0.310031	5.36692e-12	postive
ZEB1	AP001347.1	0.532146	6.10965e-36	postive		BCL2L2	AL357874.2	0.300583	2.47339e-11	postive		SCAF11	AP001458.1	0.372709	4.92013e-17	postive
PRKAA2	DNM3OS	0.532037	6.34921e-36	postive		BAD	MED8-AS1	-0.342817	1.72429e-14	negative		IL1B	LINC00528	0.409404	1.53241e-20	postive
HELLS	AL021707.2	0.531994	6.44567e-36	postive		BCL2L11	MED8-AS1	0.457857	6.91383e-26	postive		TNF	LINC00528	0.491633	3.74001e-30	postive
HELLS	AL445489.1	0.53195	6.54499e-36	postive		BCL2	LINC00892	0.302062	1.95438e-11	postive		IL1B	AC007620.3	0.478613	1.88015e-28	postive
HMOX1	SMIM25	0.531817	6.85886e-36	postive		FAS	LINC00892	0.300264	2.60215e-11	postive		SCAF11	AC007620.3	0.676062	1.8546e-64	postive
PTGS2	AC007684.2	0.531792	6.91925e-36	postive		BAD	FMR1-IT1	-0.336791	5.21843e-14	negative		PLCG1	AL356299.3	0.400733	1.13223e-19	postive
PTGS2	AC011933.2	0.531787	6.93048e-36	postive		BCL2L11	FMR1-IT1	0.359791	6.67834e-16	postive		SCAF11	AL356299.3	0.456533	9.94218e-26	postive
HELLS	LINC01126	0.531293	8.24391e-36	postive		BCL2L12	FMR1-IT1	-0.307336	8.34576e-12	negative		IL1B	AC010976.1	0.421768	7.98396e-22	postive
LOX	C2orf27A	0.531179	8.57784e-36	postive		BCL2L12	SNHG9	0.330078	1.74238e-13	postive		SCAF11	AC010976.1	0.716964	8.01376e-76	postive
PTGS2	ZNF451-AS1	0.531019	9.07292e-36	postive		BID	SNHG9	0.318582	1.28332e-12	postive		GSDMD	AL158212.3	-0.307168	8.57693e-12	negative
ZEB1	C1RL-AS1	0.530951	9.29065e-36	postive		BAD	AC003991.1	-0.321876	7.30521e-13	negative		SCAF11	AL158212.3	0.567483	1.14377e-41	postive
PTGS2	NDUFV2-AS1	0.530757	9.94627e-36	postive		BCL2A1	AC003991.1	0.413472	5.87559e-21	postive		IL1B	AC090753.1	0.519633	4.54003e-34	postive
ZEB1	AC019118.1	0.530744	9.98897e-36	postive		BCL2L11	AC003991.1	0.453215	2.45442e-25	postive		SCAF11	AC090753.1	0.384687	3.93863e-18	postive
HELLS	AL590729.1	0.53062	1.04333e-35	postive		BCL2L12	AC003991.1	-0.336422	5.58031e-14	negative		IL1B	AC011352.3	0.788799	1.29338e-101	postive
ZEB1	AL161891.1	0.530598	1.05143e-35	postive		BAD	C3orf35	-0.334769	7.52746e-14	negative		SCAF11	AC011352.3	0.413647	5.6371e-21	postive
PRKAA2	MANEA-DT	0.530578	1.05868e-35	postive		BCL2L11	C3orf35	0.401552	9.39706e-20	postive		SCAF11	U47924.1	0.361855	4.43745e-16	postive
PTGS2	AC108463.2	0.530457	1.10434e-35	postive		BCL2L12	C3orf35	-0.346483	8.68595e-15	negative		SCAF11	AP003392.4	0.411806	8.71528e-21	postive
HELLS	AC012640.1	0.530413	1.12155e-35	postive		BAD	AC007390.1	-0.40115	1.02984e-19	negative		GSDMA	AC131025.1	0.421333	8.87619e-22	postive
PTGS2	ATP1B3-AS1	0.530376	1.13636e-35	postive		BCL2L11	AC007390.1	0.507029	2.91457e-32	postive		SCAF11	AL023803.3	0.362507	3.8968e-16	postive
PRKAA2	KLF7-IT1	0.530294	1.16932e-35	postive		BCL2L12	AC007390.1	-0.361769	4.51393e-16	negative		IL1B	AC131934.1	0.484514	3.25197e-29	postive
HELLS	AC008033.3	0.530123	1.24137e-35	postive		FAS	AL589765.4	-0.307488	8.14149e-12	negative		SCAF11	AC131934.1	0.625087	1.22974e-52	postive
RPL8	SLC12A9-AS1	0.530074	1.26243e-35	postive		BAD	MIR17HG	-0.338547	3.78845e-14	negative		IL1B	ITPK1-AS1	0.347215	7.56687e-15	postive
PRKAA2	AC243773.2	0.529885	1.34891e-35	postive		BCL2L11	MIR17HG	0.370087	8.43415e-17	postive		SCAF11	ITPK1-AS1	0.60816	3.52644e-49	postive
ZEB1	AC073957.1	0.529778	1.39998e-35	postive		BAD	LINC01772	-0.310261	5.16751e-12	negative		SCAF11	AC005674.1	0.562566	7.88751e-41	postive
HELLS	AC005519.1	0.529723	1.42683e-35	postive		BCL2L11	LINC01772	0.453793	2.09828e-25	postive		SCAF11	AC026333.4	0.346454	8.73398e-15	postive
PTGS2	AP001793.1	0.529649	1.46415e-35	postive		BCL2L12	LINC01772	-0.329704	1.86171e-13	negative		SCAF11	AL035416.1	0.460886	2.99342e-26	postive
HELLS	THUMPD3-AS1	0.529615	1.48182e-35	postive		BAD	AC008669.1	-0.340197	2.799e-14	negative		SCAF11	MIR99AHG	0.533115	4.34425e-36	postive
PRKAA2	AP001429.1	0.529608	1.48555e-35	postive		BAK1	AC008669.1	-0.314606	2.51038e-12	negative		IL1B	AC012181.2	0.55282	3.29696e-39	postive
PTGS2	AC010999.2	0.529601	1.48918e-35	postive		BCL2L11	AC008669.1	0.314056	2.75234e-12	postive		SCAF11	AC012181.2	0.663613	2.34679e-61	postive
ZEB1	AC122129.1	0.529524	1.52942e-35	postive		BCL2L12	AC008669.1	-0.361814	4.47331e-16	negative		SCAF11	AC022211.2	0.665434	8.4378e-62	postive
ZEB1	AC112721.2	0.529374	1.61187e-35	postive		TNFRSF1A	AC008669.1	-0.333371	9.68077e-14	negative		TNF	AC246787.2	0.318599	1.27971e-12	postive
ZEB1	AC108449.1	0.529235	1.6918e-35	postive		CSE1L	AL035461.3	0.301328	2.19725e-11	postive		SCAF11	AC145146.1	0.675989	1.93602e-64	postive
CRYAB	LINC00702	0.528964	1.85913e-35	postive		BAD	AP002907.1	-0.378682	1.41525e-17	negative		IL1B	AC108063.1	0.486422	1.83065e-29	postive
PTGS2	AC066613.1	0.528859	1.92764e-35	postive		BCL2A1	AP002907.1	0.31094	4.61954e-12	postive		SCAF11	AC108063.1	0.650514	3.00496e-58	postive
PRKAA2	MAGI1-IT1	0.528812	1.95998e-35	postive		BCL2L11	AP002907.1	0.514571	2.46625e-33	postive		SCAF11	AC090579.1	0.392906	6.55207e-19	postive
ZEB1	AL390961.2	0.5288	1.96763e-35	postive		BCL2L12	AP002907.1	-0.331955	1.24739e-13	negative		IL1B	AP000919.1	0.661552	7.40996e-61	postive
LOX	LUCAT1	0.528799	1.96829e-35	postive		BAD	DLGAP4-AS1	-0.355949	1.41814e-15	negative		SCAF11	AP000919.1	0.619294	1.98108e-51	postive
HELLS	IRF1-AS1	0.528747	2.00435e-35	postive		BCL2L11	DLGAP4-AS1	0.496982	7.1218e-31	postive		IL1B	ZNF433-AS1	0.35278	2.6191e-15	postive
ZEB1	AC011676.2	0.528465	2.21066e-35	postive		BCL2L12	DLGAP4-AS1	-0.332867	1.05965e-13	negative		SCAF11	ZNF433-AS1	0.573181	1.17178e-42	postive
ZEB1	AC018695.4	0.528454	2.21947e-35	postive		BAD	LINC00893	-0.379324	1.23588e-17	negative		SCAF11	AL513218.1	0.388997	1.54737e-18	postive
ZEB1	AL137782.1	0.528439	2.23086e-35	postive		BCL2L11	LINC00893	0.378311	1.53018e-17	postive		SCAF11	AC106028.3	0.339206	3.35798e-14	postive
RPL8	PXN-AS1	0.528299	2.34215e-35	postive		BCL2L12	LINC00893	-0.368552	1.15372e-16	negative		IL1B	Z97200.1	0.634371	1.26397e-54	postive
LOX	GK-AS1	0.528185	2.4367e-35	postive		BAD	AC068790.2	-0.325425	3.94995e-13	negative		SCAF11	Z97200.1	0.479726	1.35396e-28	postive
PTGS2	AC004466.3	0.528138	2.47632e-35	postive		BCL2L11	AC068790.2	0.375659	2.66756e-17	postive		SCAF11	AL139082.1	0.442097	4.71819e-24	postive
ZEB1	AC112721.1	0.528125	2.48795e-35	postive		BCL2L12	AC068790.2	-0.313031	3.26565e-12	negative		IL1B	ARAP1-AS2	0.565591	2.41409e-41	postive
PTGS2	AC020612.3	0.528098	2.51094e-35	postive		BCL2L11	AL121583.1	0.307053	8.73919e-12	postive		SCAF11	ARAP1-AS2	0.658565	3.8598e-60	postive
PTGS2	ZMIZ1-AS1	0.527954	2.63975e-35	postive		TNFRSF1A	AL390728.6	-0.344302	1.30756e-14	negative		IL1B	AC087392.4	0.409214	1.60189e-20	postive
PTGS2	AC009754.1	0.527885	2.70323e-35	postive		BMF	AL357033.4	0.319976	1.01192e-12	postive		SCAF11	AC087392.4	0.468827	3.20329e-27	postive
PTGS2	RASA2-IT1	0.527884	2.7041e-35	postive		BAD	AC069549.1	-0.31093	4.62698e-12	negative		IL1B	ZBTB20-AS4	0.478092	2.19163e-28	postive
PTGS2	AL031670.1	0.527724	2.85844e-35	postive		BCL2A1	AC069549.1	0.441092	6.13024e-24	postive		SCAF11	ZBTB20-AS4	0.660183	1.58223e-60	postive
ZEB1	AC078777.1	0.527695	2.88766e-35	postive		BCL2L11	AC069549.1	0.445844	1.76346e-24	postive		SCAF11	AC010530.1	0.505945	4.13678e-32	postive
HELLS	AL022322.1	0.527525	3.06238e-35	postive		BCL2L12	AC069549.1	-0.307592	8.00457e-12	negative		GSDMD	FOXN3-AS1	0.311186	4.43544e-12	postive
ZEB1	AL445309.1	0.527361	3.2418e-35	postive		BAD	AC010542.6	-0.302541	1.81038e-11	negative		IL1B	MAGI1-IT1	0.428898	1.37309e-22	postive
ZEB1	MRPS9-AS1	0.527294	3.31774e-35	postive		BCL2L11	AC010542.6	0.526428	4.47317e-35	postive		SCAF11	MAGI1-IT1	0.694153	3.0025e-69	postive
ZEB1	AC091906.1	0.527228	3.39403e-35	postive		BAD	AL020997.3	-0.343548	1.5049e-14	negative		PLCG1	LINC00618	0.38027	1.01168e-17	postive
HELLS	AC004551.1	0.527202	3.4244e-35	postive		BCL2L11	AL020997.3	0.443525	3.24735e-24	postive		IL1B	AC010618.3	0.403413	6.14045e-20	postive
ZEB1	AC084824.6	0.527113	3.53129e-35	postive		BCL2L12	AL020997.3	-0.334795	7.49133e-14	negative		SCAF11	AC010618.3	0.585541	7.15447e-45	postive
HELLS	AL359921.1	0.527108	3.53825e-35	postive		BAD	LINC00630	-0.388319	1.79425e-18	negative		SCAF11	AC018648.1	0.51214	5.50496e-33	postive
PRKAA2	AC010834.3	0.527106	3.54024e-35	postive		BCL2L11	LINC00630	0.440739	6.71919e-24	postive		SCAF11	AC004951.4	0.388417	1.75626e-18	postive
HELLS	LINC00893	0.527086	3.56412e-35	postive		BCL2L12	LINC00630	-0.376012	2.4781e-17	negative		SCAF11	AL354993.1	0.533014	4.50135e-36	postive
ZEB1	AC009962.1	0.527037	3.6252e-35	postive		TNFRSF1A	LINC00630	-0.316186	1.92523e-12	negative		SCAF11	AC073254.1	0.432513	5.53525e-23	postive
PTGS2	AC022558.3	0.527034	3.62965e-35	postive		BCL2L11	SEPSECS-AS1	0.347089	7.74836e-15	postive		NOD2	HM13-IT1	0.349711	4.7142e-15	postive
HELLS	AC062037.3	0.527008	3.66171e-35	postive		BCL2L12	SEPSECS-AS1	-0.33331	9.78707e-14	negative		PLCG1	HM13-IT1	0.452631	2.87457e-25	postive
HELLS	AC005776.2	0.526994	3.67923e-35	postive		BCL2L11	AC104695.2	0.424221	4.3772e-22	postive		SCAF11	HM13-IT1	0.352601	2.71106e-15	postive
PTGS2	AL442067.1	0.526971	3.70964e-35	postive		BCL2L12	AC104695.2	-0.309949	5.43988e-12	negative		CASP6	AC068580.1	-0.303055	1.66728e-11	negative
PTGS2	AP005899.1	0.526926	3.76714e-35	postive		BCL2L2	AC104695.2	0.338553	3.78426e-14	postive		SCAF11	PAXIP1-AS2	0.566356	1.78546e-41	postive
ZEB1	FAM87B	0.526865	3.84776e-35	postive		BAD	AD001527.1	-0.35097	3.70684e-15	negative		IL1B	LINC00578	0.436857	1.83074e-23	postive
ZEB1	AC015849.3	0.526777	3.96619e-35	postive		BCL2L11	AD001527.1	0.418515	1.758e-21	postive		SCAF11	LINC00578	0.563254	6.03157e-41	postive
HELLS	NSMCE1-DT	0.526111	4.98993e-35	postive		BCL2L12	AD001527.1	-0.306289	9.89573e-12	negative		IL1B	AC007336.1	0.427346	2.02175e-22	postive
HELLS	AL139147.1	0.525941	5.29055e-35	postive		BAK1	AC004918.1	-0.315	2.35006e-12	negative		SCAF11	AC007336.1	0.685206	7.7709e-67	postive
ZEB1	EHD4-AS1	0.525918	5.33351e-35	postive		BAD	AL450998.3	-0.38985	1.28408e-18	negative		SCAF11	GPRC5D-AS1	0.433076	4.79953e-23	postive
EPAS1	LINC01235	0.525872	5.41869e-35	postive		BCL2A1	AL450998.3	0.341473	2.21193e-14	postive		IL1B	AC022001.2	0.509414	1.34359e-32	postive
ZEB1	CASC19	0.525851	5.45751e-35	postive		BCL2L11	AL450998.3	0.535905	1.61683e-36	postive		SCAF11	AC022001.2	0.677529	7.8066e-65	postive
PTGS2	ANKRD44-AS1	0.525765	5.62201e-35	postive		BCL2L12	AL450998.3	-0.349771	4.6605e-15	negative		SCAF11	AC015922.3	0.324255	4.8419e-13	postive
ZEB1	AC016644.1	0.525747	5.65638e-35	postive		BCL2L2	AL450998.3	0.329965	1.77766e-13	postive		IL1B	CD44-AS1	0.557696	5.17359e-40	postive
HELLS	AL137003.1	0.525729	5.69102e-35	postive		TNFRSF1A	AP001469.3	-0.335081	7.11448e-14	negative		SCAF11	CD44-AS1	0.678947	3.36718e-65	postive
ZEB1	AF127577.4	0.525694	5.76044e-35	postive		BCL2L11	MIRLET7BHG	0.358849	8.04053e-16	postive		SCAF11	RNF157-AS1	0.375469	2.77535e-17	postive
ZEB1	AC005180.2	0.525629	5.89156e-35	postive		BAD	AC016405.1	-0.3749	3.12466e-17	negative		IL1B	AC062037.3	0.410389	1.21646e-20	postive
ZEB1	AL021578.1	0.525411	6.35035e-35	postive		BCL2L11	AC016405.1	0.542111	1.73467e-37	postive		SCAF11	AC062037.3	0.567629	1.07971e-41	postive
ZEB1	AC008669.1	0.525395	6.38564e-35	postive		BCL2L12	AC016405.1	-0.355933	1.42261e-15	negative		SCAF11	AC009041.3	0.469023	3.02938e-27	postive
HELLS	RNASEH2B-AS1	0.525368	6.44497e-35	postive		BAD	AC108463.2	-0.368537	1.15714e-16	negative		IL1B	AL008718.3	0.388579	1.69512e-18	postive
ZEB1	AC124045.1	0.525296	6.60512e-35	postive		BCL2A1	AC108463.2	0.403118	6.56982e-20	postive		SCAF11	AL008718.3	0.68132	8.15439e-66	postive
PTGS2	AC108463.3	0.525292	6.61418e-35	postive		BCL2L11	AC108463.2	0.56625	1.86194e-41	postive		SCAF11	AC079313.2	0.340993	2.41694e-14	postive
HELLS	GSN-AS1	0.525273	6.65766e-35	postive		BCL2L12	AC108463.2	-0.362011	4.30195e-16	negative		IL1B	AC011676.3	0.385194	3.53134e-18	postive
HELLS	TMEM202-AS1	0.525272	6.66054e-35	postive		BCL2L2	AC108463.2	0.308592	6.79754e-12	postive		SCAF11	AC011676.3	0.550213	8.76733e-39	postive
ZEB1	LINC02576	0.525101	7.06419e-35	postive		BAD	AC008429.1	-0.320831	8.74119e-13	negative		IL1B	ASAP1-IT2	0.466078	6.99116e-27	postive
PTGS2	AL157394.1	0.524995	7.32595e-35	postive		BCL2L11	AC008429.1	0.377199	1.93319e-17	postive		SCAF11	ASAP1-IT2	0.662631	4.065e-61	postive
ZEB1	AC005046.2	0.524978	7.36671e-35	postive		BCL2L2	AC008429.1	0.305153	1.18949e-11	postive		SCAF11	AC120042.2	0.453853	2.06458e-25	postive
PRKAA2	AC019186.1	0.524971	7.38496e-35	postive		BAD	UBE2Q1-AS1	-0.307264	8.44337e-12	negative		IL1B	AL442067.2	0.448547	8.60332e-25	postive
HELLS	AL356299.3	0.524947	7.44708e-35	postive		BCL2L11	UBE2Q1-AS1	0.377685	1.74542e-17	postive		SCAF11	AL442067.2	0.571552	2.25795e-42	postive
HELLS	MED4-AS1	0.524938	7.47072e-35	postive		BAD	ZNF346-IT1	-0.392731	6.81136e-19	negative		SCAF11	DLEU2	0.661639	7.06062e-61	postive
[truncated: 10,040 more rows]

## Sheet: S3
DEGs in cluster 1 and cluster 2
gene	lowMean	highMean	logFC	pValue	fdr
ELFN1.AS1	5.6207	20.6099	1.87452	2.71e-51	3.36e-47
ACTL8	1.164	3.66553	1.65493	0.00241987	0.00869742
SUZ12P1	1.81528	3.7775	1.05724	0.00967456	0.0258985
CYP2W1	17.4897	36.0289	1.04265	0.0212208	0.0481287
AL365226.1	27.7912	53.9026	0.955725	0.000766497	0.00359239
AMH	1.40578	2.60872	0.891973	0.000282307	0.00163635
RPL13P12	68.8025	122.789	0.835652	0.000126651	0.000901206
GTF2IP13	1.50141	2.67263	0.831945	9.77e-11	5.5e-08
AC083809.1	1.18982	2.11737	0.831525	0.00726695	0.0205322
MTCO3P12	19.222	34.1822	0.830491	0.00182376	0.00698207
SMKR1	1.59824	2.7777	0.797411	2.05e-06	4.69e-05
RPL12P4	2.56784	4.44797	0.79259	3.82e-05	0.000377024
TMEM52	3.43709	5.90708	0.781257	1.17e-08	1.49e-06
KLHL35	1.2964	2.22477	0.779144	5.37e-06	9.11e-05
AC104823.1	3.6908	6.29938	0.771276	0.00340881	0.0113514
EMSLR	6.91538	11.7046	0.759191	8.97e-09	1.26e-06
GRB7	17.0379	28.7235	0.753483	0.00715187	0.0202718
POU5F1B	1.3882	2.33771	0.751881	9.12e-07	2.8e-05
AL627309.6	1.31498	2.18821	0.734714	0.00741402	0.0208677
ZP3	4.46815	7.36411	0.720833	8.78e-15	5.44e-11
SSTR5	1.20059	1.97631	0.719062	0.000210972	0.00131668
AC055717.2	1.26123	2.05512	0.70439	0.000718955	0.00341442
CPNE7	9.45409	15.3973	0.703668	1.07e-06	3.07e-05
PGGHG	14.2189	22.9388	0.689973	6.02e-05	0.000517431
IL1RL2	0.933718	1.5012	0.685057	0.00121813	0.00512636
MHENCR	7.26284	11.657	0.682586	1.75e-11	1.55e-08
MIR4728	0.929508	1.49169	0.682413	0.0204051	0.0466547
SNORD60	3.44932	5.49847	0.672721	1.31e-06	3.48e-05
LY6G6F.LY6G6D	6.67345	10.5827	0.665202	0.00112195	0.00482489
AL133260.1	1.4843	2.34582	0.660313	2.38e-07	1.11e-05
SLC38A5	18.9947	29.9647	0.657665	2e-08	2.08e-06
RPL39P40	2.90961	4.57896	0.654194	0.000440345	0.00231701
MTRNR2L12	1.77467	2.7847	0.64997	0.00276517	0.00962217
MIR324	0.955689	1.49697	0.647432	0.00105363	0.00458847
LINC01357	1.02736	1.60798	0.646304	2e-05	0.000232807
PRR22	1.50902	2.35906	0.6446	1.06e-09	2.98e-07
RHPN1	6.39742	9.96202	0.638948	1.01e-09	2.9e-07
CGREF1	6.31169	9.82644	0.638643	1.15e-10	6.2e-08
VPS9D1.AS1	6.79425	10.5568	0.635781	1.94e-08	2.08e-06
AC008267.5	1.99279	3.08399	0.63001	4.49e-12	5.56e-09
FAM222A.AS1	0.891594	1.37895	0.629112	2.23e-09	5.11e-07
ATP2A1.AS1	1.24028	1.91375	0.625742	2.9e-06	5.98e-05
PRR7	5.79089	8.92721	0.624424	2.72e-07	1.2e-05
MIR148A	0.93843	1.44435	0.622103	5.4e-05	0.000480323
MIR6859.1	0.940513	1.44054	0.61509	0.00924123	0.0249871
LCN12	1.41331	2.16394	0.614588	3.1e-08	2.76e-06
LINC02604	2.03098	3.1036	0.611767	3.9e-08	3.24e-06
MAPK15	2.10377	3.21284	0.61087	0.000954974	0.0042546
MNX1.AS1	3.75185	5.72458	0.609568	3.86e-12	5.56e-09
HNRNPA1P26	1.16041	1.76462	0.604729	0.000680549	0.00327473
NPW	1.31995	2.00474	0.602929	0.0127907	0.0322924
ASMTL.AS1	2.10672	3.19724	0.601832	1.92e-05	0.000225893
AL139349.1	0.901905	1.36119	0.593815	0.000531226	0.00269828
SNHG17	11.2301	16.785	0.579797	4.06e-09	7.39e-07
GAL	7.67153	11.3814	0.569097	0.000185348	0.00119833
UCN	1.04935	1.55518	0.567576	0.00052794	0.00268326
ASIC1	2.91456	4.31608	0.566444	3.13e-09	6.05e-07
KIF12	10.8894	16.1195	0.565875	6.45e-06	0.000103909
AL591178.1	0.990355	1.46532	0.565196	0.000357524	0.00197965
GPR143	3.01632	4.46102	0.564584	0.000156053	0.00104607
SLC12A9.AS1	2.63841	3.90152	0.564367	3.56e-08	3e-06
GNG4	7.33459	10.8396	0.563526	0.00203091	0.00757828
SNHG9	4.21261	6.20663	0.559096	1.13e-05	0.000154471
NSUN5P1	3.16113	4.65665	0.558852	3.47e-08	2.94e-06
AC004890.1	1.68232	2.47665	0.557937	2.62e-07	1.19e-05
SYNE4	3.31697	4.8808	0.55725	3.21e-05	0.000331942
ASCL2	58.6182	86.144	0.555401	1.41e-05	0.000181115
AL162582.1	1.69858	2.4884	0.550893	0.00428225	0.0136611
HSF4	2.49514	3.65168	0.549442	1.01e-08	1.33e-06
CELP	1.47631	2.15834	0.547929	0.00155356	0.00617682
DIO3OS	2.60256	3.80148	0.546633	0.00120717	0.00509057
LY6G6D	14.4182	21.0548	0.546261	0.00402184	0.0129876
LINC00174	1.04525	1.52624	0.546123	3.25e-09	6.09e-07
AC010719.1	2.96179	4.31175	0.541805	3.32e-05	0.000338848
AP003774.2	12.0427	17.5226	0.541064	0.000383205	0.00209561
OR7E38P	4.64081	6.73948	0.538261	5.07e-06	8.82e-05
ANO9	22.0515	31.9478	0.534842	1.23e-07	7.37e-06
PPP2R3B	1.79459	2.59806	0.533781	9.17e-11	5.41e-08
CEL	13.415	19.4112	0.53304	0.0181909	0.0426637
PABPC1L	5.4096	7.8147	0.53067	0.000277173	0.00161188
RPL23AP65	2.75463	3.97751	0.530006	0.00364353	0.0119815
SCX	2.55974	3.68384	0.525212	3.81e-06	7.27e-05
RNU1.67P	1.37581	1.97883	0.524362	4.42e-05	0.000418466
AC133552.5	1.18431	1.70267	0.523754	0.0106856	0.0279878
SNORC	5.25298	7.54785	0.52293	5e-06	8.75e-05
METTL26	35.1604	50.4333	0.520425	4.32e-11	2.97e-08
COMTD1	21.8605	31.3502	0.52015	2.68e-07	1.2e-05
MLXIPL	8.65774	12.4132	0.519816	0.000586554	0.00290601
AC106900.1	1.54258	2.21119	0.519479	4.82e-06	8.59e-05
AL121832.2	2.93848	4.2121	0.519473	1.62e-07	8.45e-06
RNF208	7.95524	11.3891	0.517671	3.2e-07	1.36e-05
AC084125.4	0.926523	1.32615	0.51735	0.000368416	0.00203009
SNORD104	21.1195	30.1163	0.51197	3.88e-06	7.38e-05
QTRT1	18.2114	25.9387	0.510266	4.84e-10	1.76e-07
FOXP4.AS1	2.46632	3.50789	0.508241	5.3e-08	3.98e-06
SPATC1L	3.56515	5.07004	0.508035	0.00792484	0.0219994
NPEPL1	2.10115	2.98706	0.507542	6.19e-10	1.96e-07
RPL37AP8	3.95082	5.60537	0.504657	0.00274135	0.00955719
AC010422.3	3.41373	4.84231	0.504344	0.010296	0.0271568
PRKAR1B	10.1891	14.4525	0.504297	7.04e-14	2.91e-10
RPL31P61	1.22374	1.73524	0.50384	0.00130542	0.00539106
MACROD1	21.0461	29.8252	0.502978	9.45e-10	2.79e-07
AL031673.1	1.01279	1.43231	0.500014	4.24e-06	7.9e-05
ENTPD7	4.22761	2.98877	-0.500293	3.1e-12	5.48e-09
SPN	1.37371	0.97116	-0.500295	3.97e-05	0.000387652
LAMA4	6.23713	4.40879	-0.500499	3.29e-05	0.000337701
PDGFD	1.47679	1.04351	-0.501023	0.000167207	0.00110234
ADAMTS9	1.53524	1.08448	-0.501457	3.57e-06	6.96e-05
RELL1	2.40532	1.69907	-0.501481	5.38e-05	0.00047925
CCL18	19.5919	13.8384	-0.50158	9.42e-05	0.000721782
FLVCR2	1.51398	1.06935	-0.501611	2.8e-05	0.000300771
SLC2A5	1.08134	0.763593	-0.501947	0.00128592	0.00533365
IL2RB	3.35621	2.36987	-0.502024	5.62e-05	0.000491596
SPI1	9.09605	6.42013	-0.502638	0.000105472	0.000785239
PRF1	3.99214	2.81684	-0.503082	9.25e-05	0.000712129
ADGRG6	3.64548	2.57158	-0.503452	0.00051623	0.00263564
ANKRD12	2.2146	1.56195	-0.503696	3.59e-07	1.48e-05
SYT11	2.4119	1.70044	-0.504262	0.000166059	0.00109769
FBXL7	1.23423	0.870015	-0.504505	0.000846761	0.0038714
IGHV3.52	1.09994	0.775035	-0.505089	5.18e-05	0.000466314
EDIL3	4.83302	3.40512	-0.50522	1.17e-05	0.000158663
IGHA1	1361.37	958.957	-0.505525	0.000655302	0.00316926
ADGRL4	3.47758	2.44942	-0.505644	4.59e-06	8.29e-05
HLA.DRB6	14.3135	10.0813	-0.505688	0.0058364	0.0173328
DYSF	2.53186	1.78283	-0.506028	0.000102527	0.000769327
SERPING1	33.0877	23.2975	-0.506119	0.00673871	0.0193443
TOX	2.88311	2.0296	-0.506434	4.14e-05	0.000398516
NNMT	14.3995	10.1321	-0.507092	0.000773792	0.00362068
OLFML3	9.62432	6.76742	-0.508079	0.00415483	0.0133336
CHST15	2.86738	2.01572	-0.508436	2.45e-05	0.000271027
BMP2	5.85547	4.1157	-0.508647	5.7e-05	0.000496389
LEF1	3.26807	2.29664	-0.508914	0.000445101	0.00233409
IGHG2	273.671	192.273	-0.509291	0.00483308	0.0150008
JCHAIN	339.299	238.354	-0.509453	5.22e-05	0.000468751
MAP4K1	1.49143	1.04709	-0.510314	0.000969739	0.0043018
CCL2	8.05154	5.64829	-0.51145	0.00013917	0.000963142
COL5A3	3.5966	2.52165	-0.512265	0.00758762	0.0212587
SSPN	1.70381	1.19346	-0.513617	0.000167784	0.0011032
IGHV3.48	18.9244	13.2516	-0.514084	0.000270692	0.00158203
GZMA	8.63874	6.04875	-0.514185	0.000303251	0.0017326
UBE2E2	2.10124	1.47116	-0.514283	3.81e-05	0.000376217
GPR176	1.49461	1.0463	-0.514474	8.8e-05	0.000686392
DLC1	1.83234	1.28256	-0.514662	2.57e-05	0.000283031
PDGFRA	3.67672	2.57349	-0.514696	4.01e-06	7.55e-05
PALLD	14.1305	9.89052	-0.514697	4.26e-07	1.67e-05
RNF144B	1.59494	1.11596	-0.515217	1.05e-05	0.000146589
CD209	1.80563	1.26337	-0.515223	2.05e-05	0.000237359
RASSF5	2.53226	1.77071	-0.516101	2.14e-06	4.84e-05
SNPH	1.13888	0.796166	-0.516468	0.0106066	0.0278045
MMP19	2.02016	1.41197	-0.516754	0.000808257	0.00374234
TM4SF18	1.11209	0.777177	-0.516964	0.000198457	0.00126199
APOL1	40.4511	28.2625	-0.517287	6.36e-05	0.000538636
OSCAR	1.99362	1.39267	-0.517538	0.0055363	0.0166776
ANGPTL2	14.0365	9.80507	-0.517584	0.00116771	0.00497504
P2RY14	1.08247	0.756114	-0.517646	2.07e-05	0.000238997
TMEM200B	1.11357	0.77697	-0.519255	0.0151107	0.0366762
SGK1	5.50824	3.84315	-0.5193	2.86e-07	1.24e-05
MIR22HG	4.55162	3.17536	-0.51946	1.54e-06	3.85e-05
MZB1	7.89938	5.50806	-0.520195	6.31e-05	0.000536199
BCAS1	6.59223	4.59569	-0.520486	0.00895061	0.0243127
UNC5B	6.90611	4.81382	-0.520689	2.05e-05	0.000237359
ALDH1A1	33.3467	23.2301	-0.521551	0.000946216	0.00422166
FOLR2	5.40402	3.76402	-0.521758	0.000680549	0.00327473
PTPRM	2.0198	1.40667	-0.521928	7.98e-06	0.000122499
AC108449.2	1.60104	1.11493	-0.522055	0.0100432	0.0266379
LY86	2.22779	1.55128	-0.522159	0.000147129	0.000999784
LMO2	2.12597	1.48018	-0.522348	5.28e-06	9.01e-05
RGS1	8.96699	6.24189	-0.522641	0.00110237	0.0047572
NFAM1	1.54641	1.07638	-0.522731	2.87e-06	5.97e-05
ANOS1	1.44545	1.00574	-0.523264	0.0113364	0.0294123
IGLC7	9.74021	6.7764	-0.523433	0.00042595	0.00226339
LGALS2	12.0299	8.36861	-0.523569	0.019053	0.0442414
WAS	3.47663	2.41815	-0.523787	4.31e-05	0.000410351
PDE4D	1.25039	0.869653	-0.523866	8.31e-06	0.00012596
S1PR1	4.25856	2.96081	-0.524374	5.94e-06	9.82e-05
PECAM1	12.4325	8.64338	-0.524448	3.55e-06	6.95e-05
THEMIS2	4.13466	2.87283	-0.525296	3.16e-06	6.35e-05
TMEM47	3.72032	2.5849	-0.525317	0.00185598	0.00708132
TLR4	5.0971	3.54094	-0.525543	6.34e-05	0.000537415
SNX20	1.84083	1.27881	-0.525556	5.3e-05	0.000474314
NUAK1	2.00602	1.39347	-0.525657	0.000304259	0.00173756
TMEM273	1.42349	0.987843	-0.527079	2.78e-05	0.000299799
IGKV2D.40	5.15	3.57258	-0.527605	0.000140365	0.000969998
IGHV3.7	3.16469	2.19508	-0.52779	0.000166704	0.00110078
ZEB1	2.24194	1.55494	-0.527891	0.000645042	0.00312941
AL627402.1	1.08313	0.751145	-0.528038	0.000563979	0.00282354
SIGLEC1	1.26827	0.879519	-0.528078	0.000233552	0.00141884
CAV1	12.5449	8.69853	-0.528259	5.81e-05	0.00050307
AC104083.1	2.87116	1.98871	-0.529802	0.0186176	0.043434
MMP1	67.9801	47.0856	-0.529827	0.000539897	0.00273393
JAML	1.17886	0.816437	-0.529976	5.41e-06	9.14e-05
FFAR2	1.20096	0.831681	-0.530089	4.98e-08	3.85e-06
PRDM1	4.22697	2.9269	-0.53025	2.54e-06	5.48e-05
PCSK5	1.28815	0.891495	-0.531008	0.000167784	0.0011032
COL6A1	66.8073	46.2348	-0.531026	0.0021641	0.00796011
SPIB	1.3376	0.925556	-0.53126	0.000106409	0.00079126
FCER1G	24.9524	17.2657	-0.531273	2.21e-05	0.000251381
SHF	3.33024	2.30409	-0.531427	0.00406533	0.0130973
HK3	1.93839	1.34069	-0.531881	0.000678411	0.00326825
FAM78A	1.22463	0.846878	-0.532123	5.34e-06	9.1e-05
GNG2	1.69199	1.16949	-0.532846	4.99e-07	1.89e-05
CCL3L1	1.92773	1.33228	-0.533007	0.00134702	0.00551501
MRC2	9.72917	6.7216	-0.533511	0.0120809	0.0309291
LCK	5.32025	3.675	-0.53375	6.48e-05	0.00054553
ZC3H12C	1.36783	0.944455	-0.534333	5.73e-06	9.54e-05
SPARCL1	25.8779	17.8674	-0.534392	0.000800754	0.00371455
PILRA	2.67579	1.84677	-0.534959	0.000167207	0.00110234
COL16A1	5.65918	3.90549	-0.535089	0.016843	0.040118
TREM2	6.14959	4.24261	-0.535537	0.0107917	0.028212
ITGA5	11.9573	8.24881	-0.535637	0.0029916	0.0102261
A2M	49.9701	34.463	-0.536018	5.22e-05	0.000468751
GPR15	1.32732	0.915029	-0.536622	0.0131111	0.0328668
PRKCH	1.63799	1.12865	-0.537322	2.55e-09	5.38e-07
ARHGAP31	2.08297	1.43326	-0.539341	1.65e-06	4.08e-05
ADGRF5	2.77316	1.90809	-0.539401	7.4e-06	0.000115477
DST	2.97685	2.04813	-0.539481	3.78e-05	0.000374312
SDR16C5	5.66512	3.89753	-0.539546	0.00507147	0.0155421
CALD1	23.467	16.139	-0.540083	0.00278867	0.00968757
GPX8	4.69844	3.22956	-0.540845	1.69e-05	0.000206229
LPAR1	2.58406	1.77536	-0.541523	7.52e-06	0.00011706
ST6GALNAC1	46.4453	31.8981	-0.54206	0.00507147	0.0155421
SGCE	2.95155	2.02629	-0.542632	3.75e-05	0.000372717
IGLV2.8	31.6854	21.7447	-0.543156	0.000295781	0.00169933
CPEB4	2.41199	1.65499	-0.543404	1.2e-08	1.5e-06
SMCHD1	4.09569	2.81015	-0.543461	1.41e-07	8.1e-06
EPB41L3	2.00672	1.37682	-0.543503	0.000410391	0.0022034
ANO1	7.40991	5.08054	-0.544474	0.000133468	0.000934656
SNAI2	3.31305	2.26957	-0.545742	4.84e-06	8.59e-05
RGS2	11.8824	8.13888	-0.545929	2.18e-05	0.000248923
ADAMTS12	2.61139	1.78845	-0.546112	0.00324381	0.0109076
CCL4L2	2.98696	2.04468	-0.546803	0.00295821	0.0101289
CTSK	46.983	32.1508	-0.547284	0.000107733	0.000796802
ALPL	1.8516	1.26619	-0.54828	0.00679136	0.0194774
ITPR1	1.16292	0.794723	-0.549232	1.53e-05	0.000191841
CXCR4	19.7754	13.5141	-0.549246	1.56e-07	8.25e-06
SGMS2	4.82659	3.29769	-0.549549	3.26e-08	2.84e-06
RAB8B	4.32372	2.95322	-0.549981	6.53e-09	1.04e-06
MRAS	1.578	1.07779	-0.550016	0.000569994	0.00284331
MSRB3	4.14599	2.82949	-0.551175	0.00209654	0.00774611
H1.2	37.7793	25.7794	-0.551378	0.0127443	0.0322015
IGHV4.4	2.07782	1.41774	-0.551478	0.000155894	0.00104557
ADAM8	4.48676	3.06113	-0.551608	0.000107733	0.000796802
DCN	17.5439	11.9658	-0.552057	0.000227324	0.0013947
FILIP1L	9.21552	6.28368	-0.552456	3.41e-05	0.000346738
RASD2	3.29131	2.2442	-0.552458	0.0132469	0.0330665
EDNRA	3.69932	2.52203	-0.552675	0.00121081	0.005099
FERMT2	3.00844	2.04978	-0.553542	9.22e-05	0.000710922
MAP1B	1.31829	0.897925	-0.553997	0.00248999	0.00888689
TSHZ3	1.16425	0.792841	-0.554295	0.000383205	0.00209561
APOL4	2.40453	1.63684	-0.554842	3.73e-05	0.000371131
GCNT3	21.1875	14.4166	-0.555481	0.00698757	0.0199155
SERPINF1	21.747	14.7916	-0.556039	0.00226594	0.00825137
IGLV2.14	145.912	99.0955	-0.558208	6.07e-05	0.000520497
ADRA2A	4.77069	3.23944	-0.558454	0.00062695	0.00305721
SLFN5	3.30356	2.24295	-0.55862	8.04e-05	0.000644657
SLC4A4	3.30958	2.24703	-0.558628	9.09e-05	0.000702606
IGKV1.5	169.244	114.887	-0.558889	0.000101803	0.00076575
LRRC25	2.65534	1.80245	-0.558936	1.26e-05	0.000167341
ZNF488	1.16457	0.790399	-0.559138	0.00152872	0.00609764
NIBAN1	2.42297	1.64349	-0.560011	2.05e-05	0.000237829
PCED1B.AS1	1.09855	0.745105	-0.560085	4.2e-05	0.000401674
AIF1	9.9782	6.76697	-0.56027	9.11e-06	0.000134175
SPART	1.67757	1.13733	-0.560725	4.66e-05	0.000432891
IGKV2.24	24.987	16.9383	-0.560893	0.00265018	0.00932509
SPARC	215.269	145.913	-0.561029	0.000458254	0.00238589
GPR68	2.61623	1.77231	-0.561865	0.000134403	0.000939607
HEPACAM2	9.40898	6.36632	-0.563578	0.0114341	0.0295908
SLIT3	1.28948	0.872312	-0.563872	0.00174035	0.00673984
ANGPTL4	4.48666	3.03261	-0.565083	0.00327098	0.010984
TET2	1.39148	0.938991	-0.567441	1.64e-11	1.55e-08
IGFBP5	52.1089	35.1563	-0.567747	0.00883848	0.0240557
IGLC3	198.7	134.054	-0.567769	3.12e-05	0.000327126
MMP2	62.2186	41.9351	-0.569186	0.00504447	0.01549
MYH10	3.17752	2.14157	-0.569231	0.00505796	0.0155237
FGFR1	2.87434	1.93692	-0.569469	0.0001051	0.000783408
TIMP2	39.9936	26.9453	-0.569736	0.000491947	0.00253572
ITM2A	4.30122	2.89548	-0.570944	1.8e-06	4.31e-05
TMEM45A	1.24712	0.839203	-0.57151	3.94e-05	0.000385685
HLA.DQB2	4.2681	2.87108	-0.572003	0.00248292	0.0088693
NRP2	2.82483	1.8982	-0.573531	0.00500421	0.0154046
CCL8	1.82286	1.22467	-0.573812	0.000360049	0.00199096
AC099677.1	1.92413	1.29213	-0.574454	0.00115496	0.0049309
MOXD1	2.1939	1.47298	-0.574756	0.00325285	0.010929
GBP4	8.66141	5.81378	-0.575126	2.1e-05	0.000242027
CIDEC	1.98765	1.3341	-0.575201	0.0216104	0.0488602
ZBTB7C	3.59274	2.41051	-0.575743	3.59e-05	0.000361863
IGHV3OR16.8	1.34451	0.900813	-0.577775	1.06e-05	0.000147681
C5AR1	4.65326	3.11694	-0.578113	0.00017306	0.00113368
YWHAZP5	1.74909	1.17141	-0.578354	0.000471239	0.0024422
SASH3	5.12776	3.43386	-0.5785	3.29e-06	6.51e-05
PDCD1	1.11859	0.749049	-0.578547	0.00196718	0.00741419
KCNE4	1.44231	0.965658	-0.578793	0.00329836	0.0110579
SLC11A1	1.27676	0.854395	-0.579509	0.00881621	0.0240215
IFIT2	3.42966	2.29475	-0.579728	6.43e-05	0.000541948
TEK	1.47989	0.990136	-0.579789	2.99e-06	6.1e-05
CD27	3.02608	2.02427	-0.580047	0.000116832	0.000845901
MS4A6A	4.10825	2.74609	-0.581144	9.99e-06	0.000142407
ADAMTS2	7.27947	4.86226	-0.582207	0.0029007	0.00998709
FERMT3	9.14849	6.10545	-0.583436	5.17e-06	8.94e-05
CLIC2	2.36923	1.57995	-0.584536	3.12e-06	6.29e-05
IGHV1.69D	33.7578	22.5008	-0.585242	3.72e-05	0.000371131
GABRP	2.68693	1.7906	-0.585514	0.000115605	0.000839968
CD37	3.07803	2.05054	-0.586001	0.000923223	0.00414146
C1S	32.1918	21.4456	-0.586007	0.000331612	0.00186622
MDFIC	2.6171	1.74176	-0.587423	1.57e-05	0.000195568
NXN	3.28495	2.18588	-0.587655	0.00336304	0.0112353
ATP8B2	2.30161	1.53131	-0.58788	1.29e-05	0.000170551
JAK2	3.40168	2.26318	-0.587895	6.87e-08	4.81e-06
FCGR2A	5.35479	3.56254	-0.587924	3.98e-05	0.000388793
CCDC68	3.08366	2.05015	-0.588914	2.24e-05	0.0002541
LILRB2	1.67701	1.11447	-0.589533	4.07e-06	7.64e-05
ACKR1	4.20726	2.79455	-0.590267	0.0131196	0.0328681
LAPTM5	42.2273	28.0411	-0.590634	5.24e-06	9e-05
CCL13	3.71593	2.4669	-0.591022	0.000112155	0.000823112
CD4	8.80152	5.84234	-0.591206	2.05e-06	4.68e-05
PTPN22	1.12292	0.745272	-0.591416	6.12e-07	2.14e-05
CCL4	4.12282	2.73594	-0.591592	5.11e-06	8.88e-05
LAIR1	1.98794	1.3192	-0.591613	1.25e-05	0.000166863
GJA1	9.96278	6.60854	-0.592217	7.39e-08	5e-06
CARD6	1.92991	1.27949	-0.592965	8.28e-07	2.61e-05
B3GALT5	2.84693	1.88699	-0.593323	0.0216104	0.0488602
ITGAV	13.4228	8.89364	-0.593836	5.31e-10	1.79e-07
HIF1A	23.551	15.5813	-0.595974	9.12e-11	5.41e-08
LAMA2	1.59205	1.05329	-0.595985	0.00172511	0.00669127
ADGRL2	1.55122	1.02532	-0.597322	5.21e-06	8.98e-05
TENT5C	5.73799	3.79006	-0.598323	1.91e-07	9.55e-06
PMP22	19.2646	12.7235	-0.598454	1.18e-05	0.000159961
SSTR1	1.99897	1.3201	-0.598611	0.000332709	0.00187154
PLCL2	1.70238	1.12411	-0.598773	5.77e-06	9.6e-05
HLA.DQA2	8.33836	5.50498	-0.599026	0.00396131	0.0128525
PIK3CD	1.9152	1.26355	-0.600005	1.01e-05	0.000142811
PDE5A	2.67625	1.76543	-0.600196	6.75e-07	2.3e-05
PRKAR2B	2.05413	1.35473	-0.600524	5.56e-08	4.12e-06
SMARCA1	2.77327	1.82872	-0.600754	7.25e-05	0.000596165
TGFB3	2.63602	1.73631	-0.60233	0.00118192	0.00502347
IGHJ2	28.0728	18.4908	-0.602362	0.00191821	0.00726946
GJA5	2.18471	1.43857	-0.602805	0.0004553	0.0023735
PLA2G4A	4.46245	2.93758	-0.603207	7.7e-05	0.000623898
DAPP1	1.88927	1.24356	-0.603351	1.32e-05	0.00017333
DAPK1	2.94046	1.93453	-0.604061	1.89e-05	0.000224572
PLAU	27.8828	18.3332	-0.604911	0.000201181	0.00127277
CCR5	1.76339	1.1594	-0.604978	4.52e-06	8.21e-05
AC136428.1	1.23049	0.808101	-0.60662	0.000267321	0.00156709
GLT8D2	2.58705	1.69793	-0.607536	3.88e-05	0.000382087
APBB1IP	1.78943	1.17428	-0.607722	3.34e-06	6.58e-05
VSIG4	6.64249	4.35884	-0.60778	0.000271671	0.00158434
COL5A1	27.2634	17.8755	-0.608979	0.00508502	0.0155682
FGR	2.52042	1.65047	-0.610786	2.9e-05	0.000308795
IGLV6.57	36.4683	23.8651	-0.611737	7.31e-05	0.000599471
CRISPLD2	6.03071	3.94277	-0.613118	8.92e-05	0.000693646
MMP12	41.2132	26.9361	-0.613567	2.24e-05	0.0002541
CYBRD1	10.2145	6.67174	-0.614484	1.38e-05	0.000177826
CTHRC1	20.5229	13.4026	-0.614719	0.0123785	0.0315023
MEF2C	1.26701	0.827406	-0.614757	7.58e-07	2.5e-05
THBS1	33.9877	22.1942	-0.614833	0.000143596	0.000981699
NEXN	2.6634	1.73911	-0.614917	0.000805749	0.00373492
RCSD1	1.72969	1.12925	-0.615145	1.23e-06	3.36e-05
WIPF1	4.17876	2.72718	-0.615662	3.55e-07	1.48e-05
GIMAP8	1.89681	1.23771	-0.615901	2.52e-06	5.46e-05
HCK	5.65921	3.69209	-0.61616	9.16e-07	2.8e-05
FLI1	1.19861	0.781898	-0.616314	4.64e-07	1.78e-05
ITGB2	10.8736	7.09145	-0.616674	1.3e-05	0.00017135
MUC1	44.9993	29.3451	-0.616784	0.00328008	0.0110116
NID2	3.36255	2.19255	-0.616944	1.43e-06	3.67e-05
SAMD9L	3.32574	2.16636	-0.618403	4.63e-06	8.32e-05
P2RY8	1.15648	0.753278	-0.618487	3.3e-05	0.000338134
APLNR	6.48383	4.22226	-0.618831	9.72e-06	0.000139703
EFEMP1	9.17289	5.97312	-0.618891	0.00283619	0.00983885
GIMAP6	3.22174	2.09767	-0.619048	7.15e-07	2.39e-05
HAVCR2	2.72627	1.77502	-0.61909	3.21e-06	6.41e-05
GPR34	2.43256	1.58307	-0.619752	2.86e-06	5.97e-05
IGKV2OR22.4	1.82063	1.18419	-0.620534	0.000685276	0.00329364
CSF1R	7.70124	5.00686	-0.621185	6.69e-06	0.000106936
CCL3	4.10509	2.66725	-0.622063	4.45e-05	0.000420398
JCAD	2.40674	1.56248	-0.62324	0.00018158	0.00117827
CMAHP	1.27462	0.827437	-0.623349	4.03e-05	0.000391619
IGHV4.31	23.9535	15.545	-0.623785	0.000640921	0.00311308
LY96	4.43973	2.88059	-0.624107	3.33e-05	0.000339564
MILR1	1.13034	0.732798	-0.625266	3.75e-05	0.000372717
BHLHE41	5.59271	3.62274	-0.626466	1.96e-05	0.000229874
GIMAP7	4.88623	3.16379	-0.627067	2.1e-06	4.75e-05
COL8A2	2.40083	1.55309	-0.628394	0.0156205	0.0377214
OSM	3.44351	2.22646	-0.629127	0.000733777	0.00346884
H3C7	2.23029	1.44166	-0.629504	0.017718	0.041792
ARHGEF6	1.89716	1.22615	-0.6297	5.12e-07	1.92e-05
IGLV1.50	1.19222	0.769683	-0.631318	9.05e-05	0.000700542
CCN3	2.15621	1.39159	-0.631758	0.00311973	0.0105707
CD48	3.18189	2.0531	-0.632077	2.22e-06	4.94e-05
IGSF6	3.1363	2.02366	-0.6321	4.04e-06	7.6e-05
TCF4	1.34625	0.867974	-0.633227	6.16e-06	0.000101078
PDGFC	2.50639	1.61579	-0.63337	3.12e-05	0.000327126
CLMP	2.7697	1.78431	-0.63436	5.94e-05	0.000512423
LCP1	17.3268	11.1613	-0.634501	9.44e-07	2.83e-05
QKI	1.79659	1.15696	-0.634926	7.73e-06	0.000119358
IGKV1D.17	1.63464	1.05116	-0.636987	0.000577712	0.00287255
STX11	1.49417	0.960094	-0.638095	1.24e-06	3.36e-05
ERICH5	1.12545	0.722419	-0.639594	0.000267863	0.00156953
ARHGAP25	1.4813	0.950782	-0.63968	4.3e-07	1.68e-05
CXCL10	29.1339	18.6989	-0.639743	0.00160277	0.00633181
CALCRL	2.24092	1.43777	-0.640255	3.43e-07	1.44e-05
CYTH4	1.929	1.2368	-0.641241	2.59e-06	5.55e-05
ABCA1	2.67664	1.71586	-0.641488	3.48e-05	0.000353474
ITGAL	2.42446	1.55354	-0.642107	6.04e-06	9.93e-05
IGHV3.72	20.4283	13.0855	-0.642599	0.000132063	0.000928594
SLAMF8	4.29757	2.752	-0.643039	1.07e-05	0.000148689
AC116366.1	1.48181	0.948537	-0.643587	0.000944847	0.00421859
CTLA4	1.21817	0.77971	-0.6437	2.4e-05	0.000267093
SIGLEC10	2.07789	1.32945	-0.644282	5.19e-06	8.97e-05
BICC1	1.74744	1.11765	-0.644771	6.67e-05	0.000557435
IGLV4.60	12.0307	7.69391	-0.644926	0.00989946	0.0263241
CCR1	3.3488	2.14075	-0.645531	2.92e-06	5.98e-05
MS4A4A	3.38316	2.16239	-0.645748	1.17e-05	0.000158663
CLEC2B	1.92822	1.23156	-0.646787	3.46e-05	0.000351118
FCMR	2.52874	1.61439	-0.647432	3.15e-05	0.000327938
GPR183	4.85739	3.1003	-0.647773	3.11e-06	6.29e-05
EGR2	2.01633	1.2869	-0.64783	0.0119928	0.0307418
RSAD2	2.7579	1.7592	-0.648655	0.000115199	0.000838493
ITGAX	2.8225	1.79978	-0.649155	0.000150223	0.00101634
LTBP2	6.04951	3.85718	-0.649271	0.00124035	0.00519689
CD93	8.2374	5.25029	-0.649793	1.79e-07	9.21e-06
SLAMF7	3.91508	2.4943	-0.650406	8.58e-06	0.000128185
REG4	210.623	134.176	-0.65054	0.0200884	0.0460496
IGHV3.74	41.3643	26.3498	-0.650592	2.76e-05	0.000298573
AKT3	1.50687	0.95986	-0.650661	0.000193113	0.00123371
ALOX5AP	8.77372	5.58294	-0.652163	9.53e-07	2.84e-05
CLIC6	1.65283	1.0516	-0.652346	0.000300244	0.00172018
IGHV1.45	1.86015	1.18318	-0.652746	5.9e-05	0.00050997
HCLS1	5.21511	3.31477	-0.653791	1.6e-07	8.37e-06
IGKC	578.295	367.565	-0.653807	1.49e-05	0.000188576
CD55	49.3993	31.3964	-0.653893	7.25e-05	0.000596165
MS4A7	2.90907	1.84866	-0.654083	1.46e-06	3.73e-05
ARHGAP30	3.66462	2.32842	-0.654311	1.13e-06	3.19e-05
MAF	3.35429	2.13082	-0.6546	9.4e-07	2.83e-05
IGHG1	329.289	209.06	-0.655439	0.000155516	0.0010436
MPEG1	6.78046	4.30356	-0.655855	5.21e-07	1.94e-05
RSPO3	1.35431	0.859514	-0.655968	0.00428081	0.01366
CXCL9	16.7328	10.6174	-0.656244	0.000303251	0.0017326
TUSC3	1.52237	0.965825	-0.656486	1.47e-05	0.000187335
GIMAP4	6.65671	4.22144	-0.657074	5.83e-07	2.1e-05
GPC6	1.77171	1.12275	-0.658106	0.000158775	0.0010603
IGKV3OR2.268	1.49728	0.947654	-0.65991	8.98e-06	0.000133053
PTAFR	3.63303	2.29911	-0.660093	4.32e-07	1.68e-05
CRACD	2.3485	1.48538	-0.660907	8.46e-07	2.65e-05
FGL2	6.19276	3.91399	-0.661941	1.3e-07	7.69e-06
ARL4C	10.844	6.85092	-0.662535	0.000586554	0.00290601
GBP1	11.6309	7.34335	-0.663446	2.87e-06	5.97e-05
CD86	2.35503	1.48645	-0.663878	1.01e-06	2.94e-05
KIF26B	1.20388	0.759706	-0.664178	0.00336304	0.0112353
LAMA3	8.08546	5.0983	-0.665312	1.14e-05	0.000155626
GUCY1A1	2.72672	1.719	-0.665597	0.000373299	0.00205141
GNB4	2.03252	1.28108	-0.665913	1.18e-05	0.000159504
CLEC4A	2.3319	1.46905	-0.66662	3.32e-07	1.4e-05
MFAP5	2.522	1.58876	-0.666673	0.00737633	0.0207796
AC103563.1	1.27863	0.804868	-0.667775	2.07e-05	0.000238997
EVC	1.14003	0.717051	-0.668929	0.00148405	0.0059463
IGKV1D.42	1.48607	0.93465	-0.669005	0.00133265	0.0054722
MAFB	5.65975	3.55926	-0.669159	3.91e-05	0.000383729
ERO1B	1.24526	0.783081	-0.66921	1.1e-05	0.000151852
IGHV2.26	14.5525	9.11949	-0.67424	0.00197009	0.00742291
CYRIA	1.17424	0.73537	-0.67519	7.92e-07	2.57e-05
IL10RA	2.82403	1.76838	-0.675329	7.99e-07	2.58e-05
F3	20.2658	12.663	-0.678426	2.55e-06	5.49e-05
LUM	107.716	67.3027	-0.678498	0.000143097	0.000980458
IGKV3.7	3.61052	2.2556	-0.678694	5.33e-06	9.09e-05
AC142381.1	1.12657	0.703767	-0.678765	1.7e-06	4.16e-05
SAMD9	3.84207	2.39945	-0.679179	5.99e-07	2.12e-05
XDH	5.67351	3.54257	-0.679445	0.00556567	0.0167376
IGHV2.5	7.73411	4.82613	-0.680368	1.46e-05	0.000186696
COL12A1	21.391	13.3421	-0.681021	0.000321893	0.00182313
IGKV1.12	2.79168	1.74108	-0.68115	4.71e-07	1.8e-05
IGKV3.15	64.5174	40.2292	-0.681447	2.47e-05	0.00027286
TNFSF4	1.41974	0.88436	-0.682917	0.00285219	0.00987224
IGHV3.15	76.6879	47.7458	-0.683624	3.81e-05	0.000376217
IGHV3OR16.9	1.11834	0.696278	-0.683626	3.56e-05	0.000359513
BASP1	7.73031	4.81232	-0.683794	3.58e-06	6.97e-05
IGHV3.19	1.90699	1.18699	-0.683987	0.000250031	0.00149547
S100A3	2.13907	1.33092	-0.684564	0.00790464	0.0219483
IGKJ5	24.7158	15.3696	-0.685356	0.0127009	0.0321313
IGKV1.16	36.6026	22.7459	-0.686343	5.88e-05	0.000508466
NCKAP1L	2.00793	1.24771	-0.686428	1.16e-06	3.23e-05
ANXA1	21.5528	13.375	-0.688332	2.57e-06	5.52e-05
EYA2	1.54041	0.954597	-0.690352	0.00248292	0.0088693
CXCL12	5.18469	3.2085	-0.692361	9.83e-06	0.000140567
CMKLR1	1.78956	1.10686	-0.69313	5.36e-07	1.98e-05
IGHV3.47	1.5036	0.929668	-0.693629	0.00153918	0.00613145
IGLL5	23.5989	14.5886	-0.693875	0.000103622	0.00077426
TRIB2	6.41983	3.96606	-0.694828	7.82e-08	5.18e-06
COL1A2	173.48	107.167	-0.694911	0.00363351	0.0119581
MEDAG	2.08884	1.29016	-0.695153	0.0100183	0.026583
CDH11	4.58763	2.8308	-0.69654	3.77e-05	0.000373513
TRDC	1.10212	0.67987	-0.696948	0.00040043	0.00216876
IGKV1.39	1.98685	1.22559	-0.697008	0.000126654	0.000901206
KCTD12	10.6615	6.57129	-0.698167	1.77e-07	9.16e-06
CEP170	1.18038	0.727512	-0.698205	1e-06	2.94e-05
ENPP2	3.1968	1.97011	-0.698352	1.34e-05	0.000174781
COL1A1	312.683	192.649	-0.698723	0.0173226	0.0410394
AMOTL1	1.89497	1.16661	-0.699859	8.22e-05	0.000655296
NRP1	3.94841	2.43025	-0.700169	2.16e-07	1.04e-05
COL15A1	14.3117	8.80789	-0.700332	2.01e-05	0.000233487
RAB31	11.2934	6.94823	-0.70076	5.3e-05	0.000474314
PXDN	6.81214	4.19066	-0.700929	1.73e-06	4.22e-05
CTSE	30.0658	18.4956	-0.700944	0.00296655	0.0101517
KIT	1.89349	1.16469	-0.701103	2.1e-06	4.75e-05
CD79A	8.29202	5.09728	-0.701997	0.000517888	0.00264084
IRF4	1.15974	0.71206	-0.703737	5.63e-07	2.06e-05
PPP1R16B	1.56266	0.957976	-0.705941	1.95e-06	4.56e-05
CFI	5.59873	3.43145	-0.706283	7.85e-07	2.57e-05
ETS1	9.8438	6.01935	-0.709609	1.71e-10	8.15e-08
IGHV3OR16.13	1.46714	0.896341	-0.710892	0.000140753	0.000970302
IGHV4.55	8.83419	5.38978	-0.712871	0.00119198	0.00506051
CD53	15.4293	9.41113	-0.713235	2.74e-07	1.21e-05
CYTIP	3.04186	1.85473	-0.713743	7.82e-08	5.18e-06
CPA3	5.44067	3.31354	-0.715414	3.44e-05	0.00035009
ALOX5	7.88568	4.79975	-0.716277	6.71e-06	0.000106956
IL1R1	5.00194	3.04431	-0.716375	1.98e-07	9.82e-06
IL1B	9.31183	5.66682	-0.716525	5.03e-05	0.000457125
DDR2	2.71882	1.65181	-0.718928	0.000771383	0.00361077
RAB27B	2.46805	1.49844	-0.719908	4.98e-06	8.74e-05
IGLV7.46	38.1092	23.1346	-0.72009	0.00104027	0.00453891
TRBJ2.7	1.67731	1.01794	-0.720502	0.00286079	0.00988816
LRRC15	2.89089	1.75436	-0.720573	0.00119629	0.0050706
TAGAP	1.63101	0.989348	-0.721215	2.09e-07	1.02e-05
P2RY13	1.15142	0.698256	-0.72159	5.94e-07	2.12e-05
DPYSL3	13.46	8.16185	-0.72171	0.000126651	0.000901206
CAV2	3.11409	1.88596	-0.72351	7.64e-06	0.000118367
PTGER2	3.09515	1.8709	-0.72628	7.58e-07	2.5e-05
CD36	1.23359	0.745492	-0.726603	3.15e-05	0.000327938
IGKV3.20	234.427	141.654	-0.726769	1.07e-05	0.000148689
IGHV3.38	1.30293	0.787119	-0.727106	0.000143017	0.000980458
VCAM1	2.95798	1.78645	-0.727518	1e-06	2.94e-05
IGKV1.6	30.3973	18.3261	-0.730041	0.000291327	0.00168034
IGLV3.16	1.85954	1.12025	-0.731125	0.00138634	0.00562949
OSMR	3.03245	1.82627	-0.73158	7.95e-07	2.57e-05
DOCK8	1.56428	0.942016	-0.731672	7.39e-09	1.08e-06
C3AR1	5.04431	3.03623	-0.732377	4.52e-07	1.74e-05
IGHV3.30	57.5347	34.5893	-0.734108	7.3e-05	0.000598894
FPR3	6.40003	3.84523	-0.73501	1.96e-06	4.57e-05
IGHV3.53	15.1906	9.12364	-0.735493	0.000158182	0.00105721
COL6A3	28.398	17.0485	-0.73614	0.000256632	0.00152318
IGHV1.2	44.7704	26.8766	-0.736195	0.00026716	0.00156692
CHST11	2.58098	1.54939	-0.736218	5.65e-07	2.06e-05
IGHD3.3	2.53688	1.52255	-0.736562	0.0071119	0.0201813
SERPINA1	92.8575	55.7236	-0.73673	0.00291704	0.0100266
IGHV3.23	148.559	89.1112	-0.73736	1.97e-05	0.000230544
CLDN18	9.38345	5.62841	-0.73739	0.0178469	0.0420049
CDK14	1.232	0.737418	-0.740444	7.96e-05	0.000638575
SLA	1.88673	1.12877	-0.741134	9.87e-08	6.24e-06
IGHV3.35	1.99585	1.19402	-0.741177	0.00019781	0.00125982
COL8A1	4.99589	2.98739	-0.741856	0.00613499	0.0180122
NR3C1	1.9405	1.15907	-0.743452	3.62e-07	1.49e-05
IGLV3.12	1.35146	0.807026	-0.743829	0.000100393	0.000758371
IGHV3.49	33.5542	20.0276	-0.744504	2.75e-05	0.000298224
IGHV1.18	99.1913	59.1452	-0.745953	6.07e-05	0.000520497
AP002498.1	2.01115	1.1982	-0.747157	0.00698959	0.0199167
FN1	74.1163	44.1388	-0.747745	0.0148613	0.0362129
CXCL6	1.62181	0.965159	-0.748765	0.00913265	0.0247259
GFPT2	1.79843	1.07008	-0.749024	0.00311973	0.0105707
LCP2	3.18012	1.89206	-0.749123	6.5e-09	1.04e-06
ANTXR1	15.2373	9.06274	-0.74959	0.000147129	0.000999784
ITGA4	1.53452	0.911773	-0.751045	7.35e-09	1.08e-06
IL1A	1.5383	0.913792	-0.751404	0.0123635	0.0314834
HEG1	4.30759	2.55865	-0.751497	8.1e-07	2.58e-05
RASSF2	2.84936	1.69241	-0.751555	6.74e-08	4.74e-06
IGKV1.9	51.479	30.5415	-0.753214	1.46e-05	0.00018644
FAP	2.22321	1.31694	-0.755457	0.000611265	0.0030032
IGHV4.28	11.3064	6.69448	-0.756098	8.4e-05	0.000665684
GPNMB	16.5365	9.78708	-0.756707	0.000115199	0.000838493
HOXB2	2.83669	1.67845	-0.757074	0.000166059	0.00109769
MUC4	5.39888	3.18246	-0.762518	0.000785941	0.00365955
ASPN	8.70936	5.13292	-0.762787	0.00931799	0.0251233
IL2RA	1.62323	0.9555	-0.764536	1.8e-07	9.21e-06
IGHV1.58	7.58218	4.46135	-0.765133	0.000299058	0.00171498
IKZF1	1.15009	0.676263	-0.766088	1.08e-06	3.08e-05
CD274	1.34482	0.789152	-0.769039	3.23e-06	6.42e-05
AC103563.3	1.45225	0.852076	-0.769239	0.00200521	0.00750953
LILRB4	2.24739	1.31572	-0.772397	1.52e-05	0.000191287
CCN4	2.51248	1.4701	-0.773197	2.77e-06	5.83e-05
HAVCR1	2.37757	1.39114	-0.77322	0.0124336	0.031623
IGKV3.11	123.787	72.3366	-0.775059	1.18e-05	0.000159504
CD69	1.62586	0.948607	-0.777318	6.46e-07	2.22e-05
LOX	4.6572	2.71581	-0.778081	7.02e-06	0.000110827
C16orf54	1.3104	0.764015	-0.778331	8.46e-07	2.65e-05
SRGN	49.4971	28.8296	-0.779795	2.39e-08	2.27e-06
COL14A1	5.66223	3.29718	-0.78014	0.000101443	0.000763504
IGLV8.61	32.346	18.8315	-0.780441	0.000368299	0.00203009
HSD11B1	2.09853	1.22162	-0.780589	3.72e-05	0.000371131
IGKV6.21	5.60533	3.26295	-0.780621	4.05e-05	0.000393107
NXPE2	1.88155	1.09527	-0.780634	0.0060391	0.0177986
TLR2	2.22229	1.29318	-0.781127	3.82e-07	1.56e-05
FRMD6	1.66118	0.966545	-0.781298	8.86e-06	0.000131723
CCR7	1.50336	0.874678	-0.78137	1.59e-05	0.000197076
FBN1	7.0247	4.08547	-0.781934	0.000137244	0.000953013
DACT1	3.09514	1.7981	-0.783528	2.54e-06	5.48e-05
CSF3R	1.38354	0.803701	-0.783637	9.04e-06	0.000133424
IGHV4.59	60.8074	35.3102	-0.784162	3.15e-05	0.000327938
BARX2	2.4178	1.40382	-0.784338	4.08e-05	0.000394779
CD79B	1.93909	1.12562	-0.784659	0.00109902	0.00474608
IGHV1OR15.2	2.25839	1.31033	-0.785367	4.49e-06	8.2e-05
SCG5	3.76642	2.1846	-0.785826	0.00116067	0.00494844
NCF2	5.70809	3.30729	-0.787357	1.45e-07	8.14e-06
AKAP12	4.11035	2.3776	-0.789753	0.0108184	0.0282579
FCGR3A	13.0587	7.54607	-0.791212	6.09e-05	0.000521674
COL5A2	29.9518	17.3077	-0.79123	5.68e-05	0.000495273
SELP	1.34147	0.775004	-0.791543	0.000107351	0.000795417
AL512604.1	1.97601	1.13902	-0.794795	0.00317772	0.0107466
F13A1	4.23995	2.43792	-0.798392	0.00027903	0.00162115
ITGAM	2.07592	1.18735	-0.806009	2.55e-05	0.000281132
CLC	3.50838	2.00581	-0.806616	0.000557684	0.00280223
IGHG3	99.0205	56.5102	-0.809218	0.000389521	0.00212078
CYBB	10.0813	5.74721	-0.810744	1.44e-07	8.14e-06
SAMSN1	2.24675	1.28017	-0.811504	8.75e-09	1.24e-06
CLEC7A	1.58504	0.902542	-0.812455	1.4e-07	8.06e-06
PLXDC2	3.76327	2.14195	-0.81306	2.56e-06	5.51e-05
COL3A1	305.583	173.925	-0.813099	0.000103256	0.000772922
IGKV1D.39	1.45988	0.830805	-0.81327	0.000110746	0.000815673
MXRA5	11.4053	6.4898	-0.813458	3.63e-05	0.000364468
IL1RN	7.55944	4.29861	-0.814407	5.45e-06	9.19e-05
BIRC3	7.15587	4.06721	-0.815087	2.3e-07	1.09e-05
ZEB2	1.1308	0.642129	-0.816406	2.19e-06	4.91e-05
HBB	19.5387	11.0879	-0.817345	0.00555097	0.0167137
DOCK2	1.18499	0.67239	-0.817503	1.48e-07	8.15e-06
IGHGP	25.7213	14.587	-0.818282	0.00030935	0.00176338
PLXNC1	1.66731	0.944565	-0.819803	1.97e-08	2.08e-06
POU2AF1	1.71819	0.972893	-0.820538	7.28e-06	0.000114059
PI3	189.478	107.219	-0.821473	0.0143734	0.0352391
IGKV3D.15	3.48943	1.9733	-0.822379	1.62e-05	0.000200005
IGLV1.40	118.383	66.9219	-0.822913	2.79e-05	0.000299893
IGLV2.34	1.72405	0.97444	-0.823157	0.00640981	0.018623
CFH	3.52756	1.99338	-0.82345	4.05e-07	1.61e-05
IGHJ3	76.5479	43.1995	-0.825349	0.00272537	0.00952483
EVI2B	4.87796	2.74722	-0.828304	1.27e-08	1.56e-06
FCGBP	85.8016	48.2878	-0.829345	0.0164136	0.0392614
DSE	1.18245	0.665366	-0.829556	1.2e-07	7.27e-06
IGHJ3P	7.68598	4.31187	-0.833916	0.00087553	0.00397358
TNC	16.0686	8.99839	-0.836509	0.00088696	0.00401516
IGHV5.51	121.095	67.6173	-0.840676	4.52e-05	0.000424408
C4BPB	3.50633	1.95726	-0.841126	3.02e-05	0.000318622
TNFSF13B	2.17466	1.21227	-0.84308	1.07e-06	3.07e-05
S100A9	72.3965	40.3182	-0.844487	0.000621024	0.00303789
FPR1	3.19426	1.77714	-0.845928	8.8e-07	2.74e-05
IGLV5.45	12.5229	6.96554	-0.846266	0.00135355	0.00552714
MMP9	27.1457	15.0931	-0.846834	3.42e-05	0.000347756
CCL26	1.70899	0.94997	-0.84719	0.00132505	0.00544855
SULF1	25.1036	13.9321	-0.849485	0.000384461	0.0020997
SLFN11	2.58815	1.43622	-0.849642	8.44e-08	5.5e-06
IGHV3.41	1.64782	0.914216	-0.849949	0.000484159	0.00249974
IGHV3OR15.7	1.38839	0.769705	-0.851039	3.61e-05	0.000362938
COLEC12	1.14376	0.633598	-0.852148	0.000244014	0.001468
IGHV2.70D	4.68188	2.59077	-0.853707	1.29e-05	0.000170551
IGHV1.67	2.66236	1.47126	-0.855659	5.13e-05	0.000463481
IGKV4.1	218.427	120.35	-0.859912	2.94e-05	0.000312967
MIR8071.2	1.86689	1.02797	-0.860842	0.0107963	0.0282181
KRT17	14.8403	8.16974	-0.861153	0.00644726	0.0186897
IGLV2.23	105.417	58.0064	-0.861816	1.32e-05	0.000173173
PRRX1	2.82355	1.55291	-0.862537	2.26e-05	0.000255355
THBS2	26.2146	14.3255	-0.871781	0.0124087	0.031566
IGHV3.11	40.0888	21.8594	-0.874945	6.04e-07	2.13e-05
KLK11	4.60007	2.50366	-0.87762	0.00319899	0.010795
TNFAIP6	3.3695	1.83384	-0.877668	0.000135344	0.000942459
CSF2RB	3.1891	1.73439	-0.878724	3.37e-08	2.88e-06
VCAN	8.82752	4.79524	-0.880406	0.000102891	0.000770656
INHBA	6.22094	3.37819	-0.880881	0.000630929	0.00307178
TRPA1	1.51994	0.822448	-0.886019	0.000208144	0.00130681
EPHA4	1.31517	0.70966	-0.890048	9.04e-07	2.78e-05
PEG10	1.46234	0.788651	-0.890817	0.00201918	0.00755045
PDE4B	1.97683	1.06539	-0.891803	1.43e-09	3.85e-07
H2BC4	3.69488	1.99106	-0.891994	0.0120221	0.0308041
IGKV1D.8	4.56067	2.45747	-0.892071	0.00059303	0.00292989
IL7R	4.07669	2.19654	-0.892168	1.5e-08	1.76e-06
EVI2A	2.49358	1.34284	-0.892932	6.1e-08	4.41e-06
CCL19	6.50435	3.4916	-0.897514	0.00308076	0.0104702
GSTA1	2.89132	1.55203	-0.897569	0.00767946	0.0214503
IGLV3.25	87.3083	46.8441	-0.898253	5.6e-05	0.000491188
IGLV1.44	56.6953	30.3554	-0.901277	9.6e-06	0.000138686
MNDA	3.13712	1.67405	-0.906096	7.13e-09	1.08e-06
DPYD	1.85214	0.987844	-0.906837	7.04e-08	4.87e-06
SLC6A14	4.66752	2.48262	-0.910792	0.00471772	0.0147314
IGKV2.29	4.44678	2.3652	-0.910802	0.000780067	0.00364178
FYB1	2.26237	1.20259	-0.911687	6.49e-08	4.59e-06
IGHV1.69	17.8392	9.4785	-0.912316	5.06e-05	0.000459492
SLC16A2	2.06524	1.09613	-0.913886	2.44e-05	0.000270478
PDGFRL	1.21739	0.644712	-0.917066	2.31e-05	0.000258902
IGLV3.21	110.236	58.3051	-0.918907	3.91e-05	0.000383729
ALDH1L1	1.78817	0.944188	-0.921336	0.00192198	0.00728154
BCL2A1	5.45403	2.87971	-0.9214	1.13e-07	6.98e-06
SPOCK1	3.12925	1.64756	-0.925483	0.00511222	0.0156283
COL11A1	6.02486	3.16971	-0.926579	0.0131196	0.0328681
IGLV3.19	120.315	63.2363	-0.927989	0.000239132	0.00144283
MSR1	2.58551	1.35857	-0.928362	3.17e-05	0.000329036
C3	30.9451	16.2333	-0.930753	0.00147089	0.00589928
DSG3	2.66748	1.39884	-0.931243	0.00649786	0.0188055
IGKV2.30	3.75681	1.9661	-0.934174	4.71e-08	3.69e-06
CCDC80	4.7467	2.47263	-0.940882	0.00113633	0.00487149
PHLDB2	1.20267	0.624861	-0.944628	4.06e-06	7.62e-05
IGHV1OR15.9	2.46637	1.28054	-0.945634	3.74e-05	0.000371867
GREM1	9.36856	4.86265	-0.946083	0.000150744	0.00101876
IGLV1.36	8.45293	4.37758	-0.94932	0.000915542	0.00411445
IGLV3.1	49.4511	25.5537	-0.952468	2.68e-07	1.2e-05
MRC1	3.94247	2.02038	-0.96447	1.56e-06	3.89e-05
COL10A1	8.36587	4.27202	-0.969597	0.0163366	0.0391074
PTPRC	4.47542	2.28123	-0.972214	7.43e-09	1.08e-06
POSTN	39.8346	20.2968	-0.972774	3.94e-05	0.000385685
FNDC1	6.52	3.32085	-0.973319	0.0145113	0.0354999
IGKV1.8	4.05013	2.06219	-0.973791	2.99e-05	0.000317305
PLEK	6.85233	3.4748	-0.979664	7.43e-09	1.08e-06
CD163	5.63167	2.85406	-0.980546	6.21e-07	2.16e-05
IGHV4.34	43.777	22.1367	-0.983735	7.84e-05	0.000631505
IGHV3.66	8.31834	4.19614	-0.987233	5.65e-05	0.000493578
IDO1	9.18905	4.62062	-0.991827	0.00052794	0.00268326
CD84	1.19415	0.598826	-0.995769	7.32e-08	4.98e-06
SELL	2.96646	1.48593	-0.997377	4.5e-08	3.59e-06
RARRES1	16.1357	8.04324	-1.00441	1.74e-06	4.23e-05
GAS1	3.00115	1.49362	-1.0067	0.00109902	0.00474608
IGKV1D.12	1.42236	0.707624	-1.00723	0.000179542	0.00116928
ITLN1	71.0651	35.2468	-1.01165	0.0045555	0.0143516
IGLVI.70	2.96369	1.46373	-1.01775	0.000188172	0.00120963
DMBT1	54.8558	27.0655	-1.01919	0.0114201	0.0295677
VNN2	1.4167	0.697175	-1.02294	5.35e-10	1.79e-07
WFDC21P	2.50307	1.22374	-1.0324	1.68e-06	4.11e-05
CD109	2.14615	1.04769	-1.03454	2.51e-06	5.45e-05
IGLV3.27	9.43042	4.58036	-1.04186	0.000266093	0.00156316
IGHV3.21	44.8656	21.7905	-1.04191	1.09e-06	3.09e-05
IGHV3.33	43.8278	21.1957	-1.04807	3.52e-05	0.000356889
CXCL13	6.26895	3.02503	-1.05128	3.27e-05	0.000335725
IGKV1.27	28.6043	13.7276	-1.05915	4.08e-05	0.000395138
BCAT1	1.31814	0.632229	-1.05998	2.38e-06	5.23e-05
CXCL5	16.5702	7.94051	-1.06128	0.0105543	0.0277084
IGHV1.24	28.7673	13.6726	-1.07314	9.42e-06	0.000136953
PTGS2	3.89121	1.84845	-1.0739	1.58e-05	0.000196135
GBP5	2.19933	1.03287	-1.09041	2.94e-06	6.01e-05
TREM1	1.26734	0.593508	-1.09446	6.71e-06	0.000106956
IGLV1.41	3.46217	1.62023	-1.09548	0.00149817	0.00599123
FCGR3B	1.48151	0.687794	-1.10702	1.35e-06	3.53e-05
FER1L6	1.21457	0.559512	-1.1182	0.000257043	0.00152465
OLR1	2.3113	1.06176	-1.12225	0.00128978	0.0053461
ADAM12	2.92196	1.33674	-1.12822	0.000613205	0.00301035
IGHV3.43	8.77253	4.00525	-1.1311	3.89e-05	0.00038246
CXCL8	64.2242	29.31	-1.13173	4.36e-05	0.000413989
IGHV1.46	39.3294	17.9176	-1.13423	6.52e-06	0.000104908
SPP1	84.002	38.2613	-1.13454	0.000818363	0.00377924
IGHG4	230.146	104.247	-1.14254	0.0129621	0.0325987
PCSK1	6.96836	3.07389	-1.18075	0.000776207	0.0036265
IGHD3.9	1.71137	0.749263	-1.19161	0.000246587	0.00147702
RN7SL5P	1.60232	0.696914	-1.20111	0.0194163	0.0448412
IGHD	3.56651	1.55052	-1.20176	0.0103032	0.0271703
HCAR2	1.34113	0.577647	-1.21519	9.65e-05	0.00073588
B3GNT6	7.9353	3.40162	-1.22206	0.00558624	0.016775
H2AC13	3.08794	1.31812	-1.22816	0.0184379	0.0431531
IGLV2.18	18.3351	7.80087	-1.2329	0.00183657	0.00702242
AQP9	2.2326	0.943707	-1.24231	3.35e-06	6.59e-05
PLA2G2D	1.18855	0.500911	-1.24657	0.000488617	0.00252065
MARCO	3.47921	1.45071	-1.262	0.00722596	0.0204445
IGHV2.70	11.3333	4.66428	-1.28084	5.17e-06	8.94e-05
IGLV9.49	8.40432	3.42422	-1.29535	1.28e-05	0.000170082
S100A8	8.86705	3.4991	-1.34147	1.29e-05	0.000170551
PTGDR	1.53066	0.60259	-1.34491	0.00046949	0.00243415
CYP1B1	1.4107	0.543603	-1.37579	0.000120585	0.000868003
IGKV1D.13	5.81278	2.19985	-1.40183	0.00308287	0.0104745
SI	3.94879	1.4798	-1.416	0.00556548	0.0167376
IGKV5.2	3.77094	1.39451	-1.43517	9.29e-07	2.83e-05
CR2	1.41872	0.521813	-1.44299	0.0021053	0.00777154
IGHV3.20	6.24743	2.28648	-1.45014	4.38e-06	8.09e-05
FZD10	2.78191	1.01553	-1.45384	0.0069695	0.019887
VNN1	5.64997	2.05761	-1.45728	3.74e-05	0.000371923
IGLV5.37	3.67951	1.32269	-1.47604	9.34e-05	0.000717549
IGKV2.28	1.23067	0.426154	-1.53	9.59e-07	2.85e-05
SAA2	2.23385	0.76571	-1.54466	0.00350556	0.0116018
SAA1	26.4873	8.92662	-1.56911	0.0150391	0.0365382
FDCSP	4.96527	1.66366	-1.57751	0.00350877	0.0116093
KRT16	2.28299	0.664305	-1.78101	0.0141283	0.0347919
L1TD1	11.0996	3.21227	-1.78884	0.0140335	0.0346116
KRT6A	5.18067	1.18548	-2.12767	0.0212891	0.0482623
CALB1	2.36226	0.535625	-2.14087	0.0144002	0.0352978
EPHB6	2.10593	0.466592	-2.17422	0.00149733	0.00598979
TFF2	27.0458	4.54515	-2.57301	0.013668	0.0338313
KRT14	2.74768	0.195469	-3.8132	0.0218874	0.0493332
KRT5	4.00066	0.160841	-4.63653	0.000796452	0.00370014

## Sheet: S4
Primer design
Genen ID	Gene name	Primer direction	Primer sequence	Length
ID: 103352670	LINC01419	F	TCCATGTATCTATGAAGCCAAACC	105
		R	TTCATAACAGTCTCCCCTTTGTGA
ID: 105416157	NKILA	F	GGCACTGACCGTCTTCTGTT	113
		R	GGGGTAGACGCTGGGTATTG
ID: 401321	LINC00997	F	ATTCCCTAGCATTGCAGCCTC	129
		R	GTGCTCAGCGATTTCTACCC
U62317.4	CHKB-DT	F	CGGTAGCGTACGGGAAGAC	161
		R	CTGGACGGCTCTTCCTTGTC
AC078923.1	lnc-KRR1-4	F	GGCTCAGGAAACAACACTCCA	100
		R	CGGCTGGGACGTTGTAGAAG
AC114730.3	lnc-PDCD1-2	F	GCGAAGCGGTAGAGGATGT	211
		R	CAGGTTGGGAGGTCTCTCCTT
AC156455.1	lnc-MLXIP-12	F	CTGTTAGGTTTGAGGGGCGTA	101
		R	CAGTATTCTCAAGGCTCCTGGG
AC004080.1	lnc-HOXA13-2	F	AAACCCTCCACGCTTCTACA	200
		R	AGGCCTCCCAACAACTCTCT

## Sheet: S5
Western blot antibody
Antibody name	Manufacturer	Catalogue#	Species
BCL-2	Abcam	ab32124	Rabbit
BAX	Abcam	ab32503	Rabbit
Cleaved Caspase-3	CST	#9664	Rabbit
Cleaved Caspase-8	CST	#8592	Rabbit
Ki67	Abcam	ab16667	Rabbit
PCNA	Abcam	ab92552	Rabbit
GAPDH	CST	#5174	Rabbit

## Sheet: S6
DEGs in high- and low- risk group
gene	lowMean	highMean	logFC	pValue	fdr
AC156455.1	0.807411	1.99239	1.30313	1.39156e-18	1.65888e-14
AL627309.6	1.11359	1.99175	0.838816	0.000115041	0.0018942
AL358472.1	1.47007	0.872605	-0.752486	0.00648497	0.0275409
AC009283.1	2.90208	4.12531	0.507412	1.55601e-06	0.000122034
RPLP0P6	24.9189	16.5584	-0.589678	0.000576615	0.00546844
AC098935.1	1.75154	1.04306	-0.747804	0.00593531	0.0260511
LINC01234	0.726564	1.3408	0.883934	5.80739e-05	0.00123404
SNORA11	0.819629	1.39517	0.767401	0.000143469	0.00218805
EEF1A1P5	33.4847	23.2146	-0.528467	0.00479086	0.0226455
AC069200.2	0.592923	1.56325	1.39863	0.000182487	0.00255632
PMEPA1	29.623	48.4244	0.709014	2.65666e-07	4.49563e-05
L1CAM	1.46182	2.19017	0.583277	0.00869416	0.033749
RNA5SP283	0.870816	1.28305	0.55914	0.00401891	0.0199579
Z74021.1	5.41018	3.608	-0.584476	0.000358672	0.00402991
C3	21.5385	32.7091	0.602774	0.010536	0.0386461
MIR573	1.1515	1.80123	0.645464	0.0112218	0.0403585
MGP	18.6994	27.0085	0.530421	0.00884536	0.0340586
LAMA2	1.1337	1.68585	0.572441	2.60155e-05	0.00073317
S100A2	4.44096	10.2275	1.2035	0.00476896	0.0226047
AHNAK2	1.57238	2.29492	0.545488	0.000489444	0.00488665
FO393411.1	6.6945	4.13145	-0.696327	0.00229389	0.0135106
SUZ12P1	1.69128	2.95874	0.806873	0.000285318	0.00345658
AC006042.1	2.90354	4.26526	0.554819	6.73437e-06	0.000317314
AC007038.1	0.78164	1.22653	0.650011	2.46946e-06	0.000167906
BEST2	1.409	0.886702	-0.668156	0.00731047	0.0299067
RPL13AP5	59.9194	36.8267	-0.70227	2.04937e-05	0.000632917
AL357500.2	0.817724	1.44267	0.819058	0.00016016	0.00234842
AL450405.1	35.0121	21.5432	-0.700621	0.00510716	0.0237174
LEF1	2.57938	3.75336	0.541156	5.70103e-06	0.000289559
AL139396.1	1.00576	2.00404	0.994628	0.00157609	0.0105577
GAPDHP65	3.93197	2.21534	-0.827725	1.95067e-05	0.000615182
SLC1A7	1.14946	1.73324	0.592517	0.0126909	0.0441845
TMSB4XP8	71.2379	45.3671	-0.651	0.000162232	0.00235849
RPL13AP2	1.51436	0.950737	-0.67159	0.000355414	0.00400841
IGHJ3P	4.58348	7.09236	0.629824	0.00506987	0.0235901
AL117382.1	4.30186	6.23954	0.536479	0.0116645	0.0414711
SNORD94	2.31625	5.70173	1.29961	1.80597e-05	0.000586051
AC078991.1	1.76441	0.877844	-1.00715	0.0014863	0.0101247
AL049873.2	1.2002	0.828505	-0.534693	0.000391694	0.00424489
GABPB1-AS1	0.905774	1.35627	0.582419	1.55209e-05	0.000541008
AC018695.1	2.12361	0.820151	-1.37256	0.00128284	0.00915185
APOD	5.72673	10.0488	0.811238	0.000434709	0.0045378
CHCHD2P2	7.64134	5.33726	-0.517728	0.00185066	0.0117101
MIR559	4.35269	6.17047	0.503473	0.000141175	0.00217443
ARHGAP5-AS1	1.55098	2.20341	0.506556	3.44204e-09	3.09818e-06
WASF3	0.800017	1.27625	0.673804	0.0004067	0.00435213
WNT10A	0.815819	1.35083	0.72753	5.28423e-05	0.00115584
RPL10AP2	1.37057	0.969057	-0.500125	6.56234e-05	0.00132818
RNU2-6P	0.720495	1.35735	0.913728	0.00637769	0.0272406
TMPRSS13	1.82185	2.6456	0.538196	0.000366803	0.00407897
S100A4	68.2905	108.938	0.673752	0.000253065	0.00319477
CTF1	0.826105	1.19162	0.528524	0.000265684	0.00329919
RPL18AP3	58.6166	30.7441	-0.931001	8.2044e-05	0.00152107
VNN1	5.91425	3.79679	-0.639413	0.00380961	0.0192189
AC114491.1	3.46878	2.41544	-0.52214	0.000993046	0.00777288
GRP	1.40029	2.30462	0.718808	5.6871e-06	0.000289559
DCBLD2	2.44	3.69169	0.5974	0.000108174	0.00181882
AC079250.1	2.63392	1.77092	-0.572714	2.9234e-05	0.000795658
CD177	7.26667	4.152	-0.807488	0.00873174	0.0338178
AC131235.2	8.16776	4.73329	-0.787097	0.000151138	0.00226346
AC073861.1	47.4015	26.6706	-0.829683	5.35088e-05	0.00116828
PALM3	1.30368	2.11232	0.696236	3.53309e-06	0.000214887
NKD1	9.42192	14.2541	0.597281	1.42786e-05	0.000512698
REG4	265.874	140.384	-0.921362	0.000924014	0.00742738
AL356535.1	2.5002	1.21085	-1.04602	0.00203331	0.0124687
ZNF117	1.02957	1.53285	0.574166	0.00290127	0.0159236
PRR9	0.552394	1.58593	1.52155	0.00571639	0.0255512
RAB38	1.18921	1.68407	0.501952	0.00829019	0.032681
MIR4635	1.07263	1.64805	0.619609	6.64142e-05	0.00133737
PRRX1	2.10323	3.11273	0.565574	0.00201356	0.0123667
MRAP2	5.60014	3.9288	-0.511372	0.000160804	0.00235497
RPL7AP6	6.9572	4.42071	-0.654228	0.0029574	0.0161286
TPT1P4	2.42329	1.66961	-0.537459	0.00526033	0.0242117
RBMS1	1.62147	2.44652	0.593422	2.39975e-06	0.000166322
PLAC8	15.0307	9.40612	-0.676237	0.000541618	0.00524077
TXNP5	1.33126	0.859317	-0.631531	0.00295757	0.0161286
AL353662.2	1.69258	0.910516	-0.894468	0.000546774	0.00526077
AC016739.1	43.7854	26.4109	-0.729316	0.000627123	0.00578407
C6orf15	2.48555	3.87809	0.641784	3.47453e-07	5.37092e-05
RPL24P4	17.5597	11.642	-0.592925	5.20202e-05	0.00114839
AL109614.1	0.698427	1.30906	0.906351	0.000518745	0.0050855
RPL37AP1	6.24048	3.4216	-0.866987	0.000191168	0.00264068
LINC01748	1.01301	1.55803	0.621072	3.46017e-06	0.000212941
RPS18P12	7.58714	4.09776	-0.888722	2.0226e-05	0.00062954
AC127024.5	1.44043	2.59102	0.847016	0.0098027	0.0367255
SNORD63	1.11711	1.7714	0.665114	0.00535932	0.0245441
RPS3AP47	2.77561	1.91685	-0.534071	0.000387891	0.00421133
AKAP12	2.71643	4.20266	0.629592	1.08727e-05	0.000422192
TRMT112P6	1.35857	0.744135	-0.868452	0.0144708	0.0484704
SNORD12B	2.45348	4.08793	0.73654	7.19395e-05	0.00141751
LINC01116	1.00894	1.49635	0.568607	3.30402e-05	0.000859982
GAPDHP40	1.84011	1.17546	-0.646566	0.00129293	0.00918538
GPT	5.29039	3.46686	-0.609746	0.00262856	0.0148931
ARL4C	8.02816	12.0868	0.590292	2.96664e-06	0.000191164
ITPR2	2.62672	3.88943	0.566295	2.45355e-05	0.000711649
RPS10P2	2.18171	1.21917	-0.839557	0.00869414	0.033749
AP006621.2	1.19348	1.69455	0.505721	0.000239245	0.00307664
TPT1P12	1.2378	0.764703	-0.694807	0.00352131	0.0181564
SLC4A4	1.9387	1.30827	-0.567431	0.0111525	0.0401901
RPS29P5	2.90697	1.78035	-0.707358	0.00101104	0.00784927
KRT19P1	1.48664	1.04793	-0.504507	0.00591536	0.0259923
AC074085.2	7.82264	3.61966	-1.1118	0.00247977	0.0143725
FAXDC2	1.6937	2.41739	0.513275	0.000177697	0.00251284
PI3	214.79	129.544	-0.729477	2.94234e-05	0.000797174
AL049840.2	1.17536	1.80581	0.619536	1.48123e-09	1.47147e-06
AC127024.4	0.821941	1.74896	1.08939	0.000368232	0.00408663
AKT3	1.09093	1.55664	0.512882	0.000421655	0.00445617
AC024293.1	36.0949	24.1169	-0.581752	0.000178218	0.00251425
AC106820.1	1.55164	0.846517	-0.874178	0.0016328	0.0108271
UCHL1	1.7057	2.68596	0.655078	0.000222964	0.00293573
ALPK3	1.79092	2.7932	0.641218	0.000129504	0.00204209
SCG2	1.03609	1.66449	0.683926	1.41931e-06	0.000113554
AC010422.3	5.37865	2.82133	-0.930869	0.0117517	0.0416939
AL627309.7	1.20882	2.36217	0.966512	7.20739e-06	0.000332124
NEAT1	17.9603	31.0422	0.789415	1.16667e-06	0.000100781
AL353763.2	0.833026	1.1855	0.509068	6.52175e-05	0.00132221
MAP7D2	2.21727	3.22429	0.540197	0.0106254	0.0388424
LINC01004	1.66763	2.40512	0.528311	0.000126636	0.00201284
SLC2A3	4.1118	6.56013	0.673954	2.9234e-05	0.000795658
PEG10	0.871663	1.83782	1.07615	4.22474e-06	0.000240972
NKILA	0.798185	1.76615	1.14582	7.15361e-13	4.26391e-09
LINC00460	1.09457	2.48532	1.18307	0.0011786	0.00864664
ABCA1	1.96362	2.79539	0.509537	0.000168556	0.0024297
GOLGA8B	0.988886	1.41019	0.512014	3.98961e-05	0.0009726
HLA-L	5.79356	3.59452	-0.688653	0.015043	0.0499102
AC084824.5	0.84532	1.23511	0.547076	9.19437e-05	0.00163104
ACTG1P20	7.01776	3.64111	-0.946634	0.00595531	0.0260909
SNORA5C	3.24336	6.05201	0.899924	3.29335e-05	0.000859982
Z83843.1	1.05389	3.00024	1.50936	1.19737e-06	0.000100893
RPL37P2	5.90938	4.03258	-0.551302	0.00100086	0.00781863
DNAJC12	2.77306	4.42121	0.672964	0.00939324	0.0356047
AL139100.2	4.95501	2.71731	-0.866711	0.000228174	0.00297274
AC002075.2	2.43437	1.59588	-0.609197	0.00263174	0.014904
KLK8	1.2221	2.19256	0.843252	0.00609232	0.026506
WNT11	8.42666	13.5487	0.685124	0.000454371	0.00466945
LINC00623	1.2577	1.77885	0.500157	3.82961e-07	5.37092e-05
BLACAT1	1.65315	2.50436	0.599224	5.10734e-06	0.000277233
LINC00106	1.85105	2.63221	0.507929	1.03378e-06	9.7087e-05
PFN1P1	4.47773	2.8753	-0.639051	0.000373014	0.00411351
DST	2.19571	3.14201	0.517	7.3331e-07	7.87549e-05
SULT1C4	0.653623	1.51288	1.21076	0.000131055	0.00206109
MIR4768	0.886184	1.45389	0.714237	0.00865324	0.0336694
NACA2	1.65287	1.0378	-0.671444	0.000653013	0.00595606
CC2D2A	0.839598	1.21597	0.53434	6.67127e-07	7.50266e-05
SEMA7A	2.31852	3.41724	0.55963	3.07466e-06	0.000197059
CCDC80	2.98937	4.7988	0.682833	0.00188318	0.0118529
HNRNPUP1	2.53349	1.78623	-0.504208	0.00344338	0.0179017
AC009362.1	2.46137	1.32218	-0.896548	0.000103983	0.00176328
CHRDL1	1.72975	2.83438	0.71247	0.00745831	0.0303553
FFAR4	5.8927	3.8704	-0.606446	0.000103385	0.00175563
AC011495.1	3.98784	2.30958	-0.78798	0.000301995	0.00358932
SHC2	2.4164	3.46722	0.520919	0.00502636	0.0234243
AC004453.1	17.6129	11.0826	-0.668343	0.000925229	0.00742738
ACTBP2	4.50296	2.56524	-0.811781	0.000151586	0.00226732
SLC25A6P2	2.75003	0.726995	-1.91943	0.000662729	0.00600333
RN7SL381P	0.781693	2.15874	1.46552	0.0001274	0.00201691
AC113398.1	9.07662	4.28967	-1.08129	0.000431112	0.00452402
AL132989.1	1.00514	1.54387	0.619152	1.23998e-10	2.46363e-07
ASPN	6.38693	9.64636	0.594862	0.00034195	0.00388969
RPSAP54	1.95999	1.24264	-0.657439	0.000713508	0.00625881
AC136475.2	1.03996	1.49118	0.519929	3.15979e-07	5.15998e-05
NRP2	2.07537	2.9717	0.517922	4.88856e-06	0.000269799
FGF19	0.665712	2.48992	1.90313	5.36492e-07	6.3322e-05
ADAM12	2.12511	3.23699	0.607114	0.00305802	0.0165402
SALL4	0.671315	1.40401	1.06449	9.00483e-12	2.68367e-08
RPS19P1	5.92069	3.69354	-0.680761	0.000972483	0.00767749
CERS4	1.23315	1.77996	0.529496	0.00147988	0.0100867
HSP90AB3P	1.68921	1.13481	-0.573893	0.000692787	0.00614945
EPYC	0.765467	1.32165	0.787933	0.000835214	0.00693838
HNRNPKP4	1.34171	0.906093	-0.566339	0.000226861	0.00295887
SNORA7B	0.295699	2.90652	3.29709	0.00281801	0.0156371
TNFRSF19	0.948322	1.861	0.97263	2.03327e-07	3.67251e-05
AL139095.2	4.73563	2.76587	-0.775823	0.00104622	0.00802054
TPT1P9	5.51626	3.72763	-0.565435	0.00161666	0.0107426
SCARNA13	3.06744	13.6626	2.15512	0.0116536	0.0414458
AC010970.1	3.46453	0.863003	-2.00522	0.0100733	0.0374255
MIR186	1.42438	2.50362	0.813682	0.000399519	0.00429843
STRA6	1.49985	2.21021	0.559364	5.12102e-05	0.00114536
GAS1	2.00901	3.17773	0.661511	0.00135383	0.00944907
MIR3685	2.15336	3.1028	0.526983	4.08965e-06	0.000237784
CLCA4	13.4041	4.79656	-1.4826	0.00502619	0.0234243
MIR6835	0.938144	1.57421	0.746749	4.60921e-07	5.78383e-05
MIR17HG	0.869213	1.32051	0.603316	0.00609022	0.026506
SNORA71A	3.80115	24.5398	2.69061	0.00540261	0.0246666
AL122020.1	13.6886	7.67445	-0.834836	6.31274e-05	0.00130423
CYCSP6	1.86737	3.26553	0.80631	0.00111607	0.00837823
DACT1	2.12059	3.58451	0.757315	4.08943e-07	5.41668e-05
ATP5MC2P4	1.53104	0.933558	-0.713698	0.00203207	0.0124675
TFF1	377.304	214.309	-0.816032	0.000740713	0.00638008
AL080243.4	5.87677	3.55048	-0.727009	0.000837032	0.00694865
DDR2	1.85757	2.6328	0.503179	0.00105991	0.00808914
TMEM71	0.793364	1.24194	0.646536	0.000366803	0.00407897
PALM	1.20628	1.88079	0.640777	0.00224941	0.0133144
RPS19P7	1.50696	0.858472	-0.811793	0.00202848	0.0124519
EMB	2.84705	4.22586	0.569776	0.00621398	0.0267812
AC008429.2	1.65051	1.11567	-0.565001	0.000168556	0.0024297
RPS4XP2	1.31177	0.807376	-0.7002	0.00141196	0.00975766
AC136475.3	6.46805	9.57958	0.56663	0.00198881	0.0122652
RPL3P2	2.83612	1.62703	-0.801678	2.07649e-05	0.000637985
MT-TY	301.632	203.406	-0.568428	0.0106928	0.0390292
RPS6P25	3.98825	2.17996	-0.871452	0.00714561	0.0294445
VENTX	1.33181	1.88397	0.500388	0.00169995	0.0111469
SYNGR3	0.944698	1.3753	0.54182	0.0123792	0.0433655
AC136632.1	10.656	7.35413	-0.535044	0.000224255	0.00293775
PLA2G2A	197.198	112.679	-0.807433	9.64286e-05	0.00168305
COX6A1P2	11.2694	7.12597	-0.661258	0.00988673	0.0369119
CASC19	2.9641	4.45711	0.588514	0.000944862	0.00753424
HOXD11	0.642024	1.53864	1.26096	7.59859e-05	0.00145867
RPL3P7	3.61399	2.07192	-0.802623	0.000127205	0.0020165
FAP	1.65687	2.5425	0.617791	0.000395535	0.00426327
AC098591.3	3.336	1.9876	-0.747089	0.0142071	0.0478651
GABBR1	1.72712	2.53095	0.551313	1.06052e-07	2.34546e-05
AC093620.1	1.13864	1.63193	0.519271	0.0002092	0.00280533
COL11A1	4.31987	6.88894	0.673295	8.93697e-05	0.00159727
EEF1DP1	2.53429	1.49447	-0.761952	0.00357574	0.0183655
CST6	0.99591	1.77535	0.83402	0.000318378	0.00372462
AL355987.4	1.02362	1.50974	0.560609	0.000728938	0.00631058
TNFAIP6	2.45942	3.72348	0.59833	0.00403846	0.020001
AC055720.2	1.43054	2.12949	0.573952	0.000272449	0.00333643
FAUP1	8.70654	4.58849	-0.924081	0.00208953	0.0126959
AL161787.1	8.6286	6.0824	-0.504485	0.00934312	0.0354937
KRT16	0.812379	3.09261	1.9286	0.0101154	0.0375305
AC007683.1	2.3529	1.53429	-0.616868	0.00508396	0.0236372
Z97353.1	3.55809	1.97659	-0.848086	0.00158241	0.0105858
TWIST1	1.28797	1.91988	0.575916	0.0037127	0.0188577
ADAMTSL4	1.01642	1.46026	0.522727	5.89513e-05	0.00124603
DKK1	0.757441	1.84326	1.28306	0.00221062	0.013183
SNORA60	1.75421	2.58527	0.559498	0.00100694	0.00783532
CCDC8	0.886484	1.30892	0.562207	5.26769e-05	0.00115434
F5	1.10177	1.7737	0.686936	0.00437983	0.0212157
AL035446.1	0.912785	1.30822	0.519256	0.00632554	0.0271262
MIR4728	0.615798	1.86826	1.60117	0.00329183	0.0173955
KRT40	0.815432	1.60524	0.977152	0.00269347	0.01516
FN1	52.1909	84.9838	0.703389	0.000692787	0.00614945
RPS2P55	1.66014	1.15017	-0.529466	0.00217345	0.0130462
SLC14A1	1.20394	1.75845	0.546533	0.00497503	0.0232943
INHBA	4.46875	7.1553	0.679142	4.68907e-05	0.00107085
CD24P4	2.47031	1.74635	-0.500348	0.0047035	0.0223938
ARHGAP27P1-BPTFP1-KPNA2P3	1.20954	1.71437	0.503216	7.72876e-08	2.01932e-05
TMSB10P1	9.45655	6.51324	-0.537938	0.00130291	0.00922872
MIR3677	0.832092	1.22949	0.563241	0.000768659	0.00652184
DGKH	1.48337	2.17892	0.55474	0.00136772	0.00952369
AL161909.1	2.40745	1.24268	-0.954048	0.00223841	0.0132757
ABLIM3	1.02225	1.59573	0.642464	0.00441027	0.0213372
MIR570	7.3374	10.4682	0.512677	0.00676183	0.028413
RNU6-1016P	1.41315	3.27583	1.21294	0.0137277	0.0467698
AC060780.3	1.17974	1.83666	0.638624	0.00857254	0.0334511
AC136475.10	1.04304	1.47966	0.504475	0.000109351	0.00182829
RPL18P13	1.9024	0.905215	-1.07148	0.0074431	0.0303326
RPL34P31	3.48572	1.65968	-1.07055	0.000371661	0.00410582
AC011468.1	0.928431	1.35172	0.541929	1.47137e-05	0.000522029
RPL23AP65	4.81801	1.9879	-1.27719	0.00101401	0.00784933
PCSK1N	3.26753	5.22311	0.676708	0.00805739	0.032047
FRMD6	1.18418	1.77049	0.58026	0.00103268	0.00796803
PHLDA1	17.6671	26.0086	0.557919	0.000225554	0.00295152
COL9A3	5.11946	8.5642	0.742328	0.000864003	0.0070984
RPS3AP5	7.97356	3.90933	-1.0283	0.00374767	0.0189868
CTSE	33.9456	21.0469	-0.689616	0.00301452	0.0163793
AC245884.3	1.35874	2.25945	0.733705	5.287e-06	0.000282629
RPL5P1	1.47514	0.880146	-0.745036	8.56329e-05	0.0015609
RPS11P5	17.6219	10.447	-0.754286	0.000934998	0.00747559
AKR1B10	12.3512	8.71922	-0.502383	0.00180962	0.0115658
RPS13P2	7.43929	4.81182	-0.628583	0.000148919	0.00225001
LTB4R	1.59512	2.29368	0.523997	4.34945e-07	5.57525e-05
AC104695.4	0.900466	1.35953	0.594364	9.8613e-05	0.00171615
ABHD12B	0.989576	1.72431	0.801139	0.00628059	0.027039
AC078817.1	4.40857	2.23777	-0.978247	0.00030848	0.0036482
SERPINI1	1.38751	2.03728	0.554147	0.000990454	0.00776279
RPS4XP3	2.02063	1.41268	-0.516372	0.0033906	0.0177433
AF064861.1	0.77233	1.25396	0.6992	3.63953e-05	0.000917698
AC027644.1	0.84379	1.23295	0.547155	6.14342e-05	0.00128484
FTLP3	20.5826	14.1455	-0.541083	0.00174307	0.0113053
COL10A1	5.94279	9.57271	0.687789	0.000307173	0.00363636
RPL7AP30	2.54002	1.68823	-0.589324	0.000113172	0.00187378
TMEM82	1.51457	1.02727	-0.560094	0.00848083	0.0332129
IL23A	2.63799	3.84238	0.542561	8.50934e-06	0.000363584
H2AZP3	2.09632	1.37016	-0.613516	0.000568051	0.00542173
PLIN4	1.06531	2.76942	1.37832	0.000387891	0.00421133
AC018653.3	0.907848	1.31331	0.532685	5.77915e-09	4.10636e-06
DTX3	1.74278	2.47051	0.503416	5.66145e-06	0.000289559
AL590867.2	39.456	26.9741	-0.548667	0.000346791	0.00392975
AC104534.1	2.01141	2.86383	0.50974	2.39933e-06	0.000166322
BCAT1	0.905157	1.42844	0.658204	0.00476896	0.0226047
AC015871.3	0.968131	1.41887	0.551466	2.23123e-08	9.49944e-06
VCAN	6.44403	9.87159	0.61532	0.000253791	0.00319477
RPL30P4	2.02033	1.09807	-0.879618	0.00231853	0.0136288
LINC01612	1.94407	2.98845	0.620319	0.00181039	0.0115658
KRT17	9.49002	17.859	0.912166	0.00336295	0.0176218
AC104958.2	3.58246	5.38864	0.58897	3.82961e-07	5.37092e-05
SESN3	2.78006	4.30507	0.63092	2.60713e-06	0.000173629
EPHB6	0.76545	2.66042	1.79727	0.000286946	0.00346574
AL669983.1	2.91499	1.48896	-0.96919	0.000877591	0.00715251
CALCA	0.565384	3.12403	2.46611	0.000335915	0.00385398
GDAP1	1.83746	2.63018	0.517451	2.38259e-05	0.000696149
AC012618.1	8.8471	3.16654	-1.4823	0.00815618	0.0323166
CCDC9B	1.87357	2.71379	0.534521	4.70122e-08	1.51468e-05
NINL	1.14715	1.82107	0.666729	7.90815e-05	0.00148696
AL162151.2	12.86	8.26722	-0.637417	6.97045e-05	0.00138261
BEX5	1.93782	2.92529	0.594141	0.00116625	0.00861083
GP2	3.45073	0.743658	-2.21419	0.00804923	0.0320277
NTM	1.18685	1.73843	0.550652	0.00014936	0.00225383
COL8A2	1.84971	2.62527	0.505166	0.000143717	0.00218805
WFDC21P	3.22151	1.31669	-1.29082	6.22511e-05	0.0012951
BAMBI	8.01595	12.2488	0.611699	0.00214163	0.0129006
AL355472.1	4.0755	2.70494	-0.591382	2.29851e-05	0.000679915
AL365357.1	66.0589	34.4802	-0.937985	0.00614377	0.0266378
RPS14P8	8.33743	5.38913	-0.629552	0.00100688	0.00783532
HOXD10	0.879798	2.44785	1.47627	6.86545e-08	1.90333e-05
RNVU1-32	1.35729	2.10305	0.631752	5.3137e-06	0.000282788
AMIGO2	4.41602	7.9463	0.847535	1.18006e-11	2.81351e-08
PHLDB2	0.821782	1.22412	0.574915	0.000433507	0.00453319
RPS4XP8	1.68006	0.9256	-0.86005	0.00693874	0.0288719
TMEM238	29.427	19.4399	-0.598115	0.00406674	0.020116
CHST5	1.63111	1.01955	-0.677926	0.000429915	0.00452345
CA2	31.9668	21.3502	-0.582328	0.00105168	0.00805721
AC037198.1	0.62167	1.5697	1.33627	0.00409194	0.020182
MIR616	0.907139	1.3217	0.542999	9.59218e-05	0.00167912
RPL35P2	7.16528	3.62966	-0.98119	0.00358416	0.018385
RPL23AP64	0.857714	1.21942	0.507624	0.000525506	0.00513488
OBSL1	1.79735	2.69656	0.585246	0.00283247	0.0156686
LYPD3	1.42201	2.66738	0.907491	0.00458644	0.0220286
PCED1B	2.5695	3.7646	0.551011	1.06535e-09	1.41112e-06
DPY19L1P1	0.915815	1.33163	0.540062	3.78545e-07	5.37092e-05
PADI3	0.53666	2.26165	2.07529	0.0122128	0.0428959
NOTUM	21.0808	35.6995	0.759974	0.000484093	0.00485356
AC108134.3	1.90976	2.71315	0.506582	0.00310207	0.0166802
UQCRFS1P1	2.30717	1.5418	-0.581503	7.36838e-05	0.00143293
TPI1P1	5.69581	3.79121	-0.587243	2.22453e-05	0.000661313
FER1L4	1.76803	2.91634	0.72202	1.38415e-08	7.17655e-06
AP001024.1	9.03609	5.29913	-0.769941	0.00578396	0.0257375
AC004884.1	1.64809	0.722957	-1.18881	0.000100575	0.00173009
AC004849.1	0.858441	1.7672	1.04168	0.00058722	0.00553817
AL357055.1	1.4173	0.653298	-1.11733	6.7652e-05	0.00135771
RPL23AP74	1.53775	1.05397	-0.544992	0.0047963	0.0226534
HOXA2	0.882333	1.27905	0.535677	0.00445116	0.0215176
MUC2	117.429	70.1792	-0.742674	0.000408968	0.00437248
CST1	21.893	49.2481	1.1696	0.00152939	0.0103238
AC021074.1	7.58296	3.36255	-1.17321	0.00183689	0.0116538
H2BC21	4.29107	6.08745	0.504502	0.00290823	0.0159545
ERO1B	0.909037	1.3439	0.56401	0.000725051	0.00630748
OLR1	1.54564	2.68661	0.797579	0.00160449	0.0106915
TACSTD2	16.1158	23.703	0.556597	0.00113974	0.00849177
AC073957.3	1.1236	1.71155	0.607179	2.67754e-07	4.49563e-05
NPC1L1	0.997376	1.57036	0.654883	0.00027651	0.00336707
LINC02163	1.01763	1.44375	0.504613	4.01162e-05	0.000974748
RPL37AP8	5.72708	3.41258	-0.74694	0.00138227	0.00960816
THBS2	19.2636	29.8123	0.63003	0.00030114	0.00358272
SFRP4	10.3363	15.8126	0.613347	0.000709698	0.00623457
RPS3P6	1.67466	1.0379	-0.690203	0.000532769	0.0051851
AADACP1	0.834703	1.22385	0.552096	0.00777472	0.0312905
FOLR1	3.08307	5.63215	0.869319	0.0110471	0.0399432
RPL13P2	2.83788	1.46204	-0.956835	0.00257446	0.0147124
AL135844.1	1.07701	1.52818	0.504789	0.0122568	0.0430253
AC069218.1	2.09884	1.0959	-0.937478	0.00106544	0.00811572
AL109741.2	1.73723	1.16935	-0.571082	0.00846591	0.0331762
TNFRSF11B	5.56071	8.65578	0.638394	0.00279192	0.0155671
RN7SL2	171.769	1431.84	3.05933	0.014123	0.047694
IGFBP6	6.64917	9.74955	0.55216	0.00461819	0.0221454
AC018638.8	2.16179	3.088	0.514448	0.000379226	0.00416382
BX248409.1	1.34226	0.885991	-0.599299	0.00441827	0.0213672
AL138785.2	13.183	8.09413	-0.703735	0.00212583	0.0128317
SNORA71C	2.89918	7.01741	1.2753	6.62154e-05	0.00133737
AC107375.1	0.845937	1.26227	0.577401	2.16551e-10	3.68787e-07
GTF2IP13	1.48436	2.14394	0.530424	8.13834e-06	0.000356323
PLPP4	1.34249	1.95711	0.543813	0.00169357	0.0111173
AC090204.1	0.787777	1.37069	0.799044	0.000179933	0.00253245
MIR590	1.09295	1.65352	0.597313	0.00135996	0.00948632
ALDH1L2	0.816865	1.29733	0.667375	5.22478e-06	0.000280561
AC048341.2	1.01024	1.55876	0.625701	3.6385e-09	3.09818e-06
NDUFB1P1	1.68529	0.714533	-1.23793	0.00179252	0.0115133
AP003392.2	1.40525	2.01737	0.521651	0.000345535	0.00391924
AL031729.1	5.21548	3.19241	-0.708155	0.00157842	0.0105651
COMP	6.65135	9.42659	0.503089	0.00123458	0.00892503
FRMD5	1.13486	1.61343	0.507612	5.52102e-05	0.00118802
RPS18P9	4.88453	3.41429	-0.516637	0.00816523	0.0323166
MAP7D3	0.860897	1.22251	0.505928	1.45678e-05	0.000518397
TFAP2C	1.16211	1.66976	0.522896	0.00382299	0.0192376
HMGA2	1.06438	1.53326	0.526596	0.00649715	0.027573
AC055811.4	0.808854	1.2128	0.584391	1.57323e-06	0.000122579
AL033519.3	2.64139	1.8439	-0.518537	0.00867542	0.0336982
ALDOB	25.2194	11.5075	-1.13196	2.84182e-06	0.000186139
B3GNT7	10.3662	7.11459	-0.543033	0.00372141	0.0188939
AC023906.1	2.39772	1.23945	-0.951962	0.000763862	0.00650294
ZNF532	1.41019	2.15881	0.614351	9.8214e-08	2.34162e-05
ITLN1	70.125	39.6248	-0.823526	0.00285981	0.0157759
TGFB3	2.03548	2.92802	0.524557	0.00320718	0.0170835
RPS2P46	20.3821	13.0205	-0.646516	0.000500311	0.00493726
AC010343.1	15.8088	8.72339	-0.857764	2.13875e-05	0.000645469
CASP1	17.073	11.3227	-0.592501	8.51112e-05	0.00155377
CDKN2A	1.93887	2.89024	0.575976	0.00649715	0.027573
MATN3	0.873345	1.24689	0.513712	2.1178e-05	0.000645469
CDK14	0.911913	1.30006	0.511615	0.0145025	0.0485359
SNORD63B	3.2483	4.90081	0.593332	1.91924e-05	0.000610113
HOXD9	3.31038	5.67596	0.777867	1.50365e-07	3.02172e-05
ANKRD10-IT1	7.69742	11.5459	0.584931	1.56506e-05	0.000542358
CYP1B1	0.883477	1.51583	0.778848	0.00825431	0.0325935
LRRC15	2.20279	3.24848	0.560435	0.001128	0.00844127
AL512791.1	1.05872	1.52862	0.529902	1.03455e-05	0.000411095
SFRP2	24.0394	43.6714	0.861289	0.000868576	0.00711636
AC024619.4	1.55602	0.870241	-0.838376	0.00184486	0.0116982
AL049830.1	2.03642	0.70108	-1.53838	0.00198064	0.0122401
NFAT5	2.45495	3.59074	0.548586	2.40857e-07	4.22243e-05
AC109446.3	1.42778	2.4126	0.756808	0.000655468	0.00596475
INHBB	2.49616	3.92575	0.653256	0.000808695	0.00677474
HOXD13	1.48893	3.06889	1.04344	6.42987e-06	0.000307833
POSTN	29.5984	43.0259	0.539686	0.0118996	0.0421562
IGFL1	1.04044	2.21819	1.0922	0.000520817	0.00510161
AC108010.1	1.16	1.64785	0.506456	1.18306e-05	0.000447721
SMIM31	6.09805	4.15702	-0.552798	4.4619e-06	0.00024972
BTBD19	0.843355	1.21081	0.521766	4.53379e-09	3.60316e-06
ADAMTSL2	1.79796	2.76789	0.62243	7.79202e-08	2.01932e-05
CPA6	1.21099	1.7985	0.570605	0.00370221	0.0188376
AC021078.1	1.16972	1.68106	0.523209	6.74754e-07	7.50455e-05
RN7SKP80	0.454234	1.71199	1.91417	0.00410084	0.0202117
H2BC8	2.89966	7.44748	1.36087	0.0047092	0.0224106
ASS1	186.351	127.194	-0.550994	1.54007e-07	3.02172e-05
AGR2	424.371	299.781	-0.501413	0.0103155	0.0380479
AP001052.1	1.04409	1.68074	0.686849	2.34922e-06	0.00016571

## Sheet: S7
Mutscore in high- and low -risk group
gene	H-wild	H-mutation	L-wild	L-mutation	pvalue
COL6A5	163(98.19%)	3(1.81%)	136(83.95%)	26(16.05%)	1.37424e-05
DNAH3	160(96.39%)	6(3.61%)	133(82.1%)	29(17.9%)	6.04229e-05
ABCA5	165(99.4%)	1(0.6%)	144(88.89%)	18(11.11%)	0.000124611
IGSF1	165(99.4%)	1(0.6%)	144(88.89%)	18(11.11%)	0.000124611
MYO15A	162(97.59%)	4(2.41%)	138(85.19%)	24(14.81%)	0.00013224
OBSCN	147(88.55%)	19(11.45%)	116(71.6%)	46(28.4%)	0.000206025
COL18A1	164(98.8%)	2(1.2%)	143(88.27%)	19(11.73%)	0.000245447
CFAP46	164(98.8%)	2(1.2%)	143(88.27%)	19(11.73%)	0.000245447
GREB1L	164(98.8%)	2(1.2%)	143(88.27%)	19(11.73%)	0.000245447
FLNB	163(98.19%)	3(1.81%)	141(87.04%)	21(12.96%)	0.000245589
ADGB	163(98.19%)	3(1.81%)	141(87.04%)	21(12.96%)	0.000245589
CACNA1A	161(96.99%)	5(3.01%)	138(85.19%)	24(14.81%)	0.000357104
SLC3A2	162(97.59%)	4(2.41%)	140(86.42%)	22(13.58%)	0.000400742
VPS13D	163(98.19%)	3(1.81%)	142(87.65%)	20(12.35%)	0.000430491
MYH8	163(98.19%)	3(1.81%)	142(87.65%)	20(12.35%)	0.000430491
FCGBP	159(95.78%)	7(4.22%)	135(83.33%)	27(16.67%)	0.000436282
ZFHX3	155(93.37%)	11(6.63%)	129(79.63%)	33(20.37%)	0.000483964
UBR4	161(96.99%)	5(3.01%)	139(85.8%)	23(14.2%)	0.000610268
LTBP2	162(97.59%)	4(2.41%)	141(87.04%)	21(12.96%)	0.000691088
CACNA1H	159(95.78%)	7(4.22%)	136(83.95%)	26(16.05%)	0.0007298
IGSF10	163(98.19%)	3(1.81%)	143(88.27%)	19(11.73%)	0.00075046
MYH14	161(96.99%)	5(3.01%)	140(86.42%)	22(13.58%)	0.00103538
MTOR	161(96.99%)	5(3.01%)	140(86.42%)	22(13.58%)	0.00103538
KCNB2	162(97.59%)	4(2.41%)	142(87.65%)	20(12.35%)	0.00118391
RIMS1	159(95.78%)	7(4.22%)	137(84.57%)	25(15.43%)	0.00121073
SYNE2	157(94.58%)	9(5.42%)	134(82.72%)	28(17.28%)	0.00127889
NLRP7	165(99.4%)	1(0.6%)	148(91.36%)	14(8.64%)	0.00128034
ATG2A	165(99.4%)	1(0.6%)	148(91.36%)	14(8.64%)	0.00128034
ADGRL2	163(98.19%)	3(1.81%)	144(88.89%)	18(11.11%)	0.00130075
TOP2B	163(98.19%)	3(1.81%)	144(88.89%)	18(11.11%)	0.00130075
COL3A1	164(98.8%)	2(1.2%)	146(90.12%)	16(9.88%)	0.00134926
ELMSAN1	164(98.8%)	2(1.2%)	146(90.12%)	16(9.88%)	0.00134926
TANC2	164(98.8%)	2(1.2%)	146(90.12%)	16(9.88%)	0.00134926
RERE	164(98.8%)	2(1.2%)	146(90.12%)	16(9.88%)	0.00134926
MYO16	160(96.39%)	6(3.61%)	139(85.8%)	23(14.2%)	0.0014682
LAMA3	160(96.39%)	6(3.61%)	139(85.8%)	23(14.2%)	0.0014682
DYSF	158(95.18%)	8(4.82%)	136(83.95%)	26(16.05%)	0.00160614
FAT1	156(93.98%)	10(6.02%)	133(82.1%)	29(17.9%)	0.00162154
PXDNL	161(96.99%)	5(3.01%)	141(87.04%)	21(12.96%)	0.00174333
ADGRV1	153(92.17%)	13(7.83%)	129(79.63%)	33(20.37%)	0.00186653
KIAA1024	163(98.19%)	3(1.81%)	145(89.51%)	17(10.49%)	0.00224093
MYOF	163(98.19%)	3(1.81%)	145(89.51%)	17(10.49%)	0.00224093
POLQ	163(98.19%)	3(1.81%)	145(89.51%)	17(10.49%)	0.00224093
CDK5RAP2	163(98.19%)	3(1.81%)	145(89.51%)	17(10.49%)	0.00224093
ABCA7	164(98.8%)	2(1.2%)	147(90.74%)	15(9.26%)	0.00235967
NF1	164(98.8%)	2(1.2%)	147(90.74%)	15(9.26%)	0.00235967
FER1L6	164(98.8%)	2(1.2%)	147(90.74%)	15(9.26%)	0.00235967
PCLO	145(87.35%)	21(12.65%)	119(73.46%)	43(26.54%)	0.00240613
ZNF469	160(96.39%)	6(3.61%)	140(86.42%)	22(13.58%)	0.00243124
DOCK3	160(96.39%)	6(3.61%)	140(86.42%)	22(13.58%)	0.00243124
SCN5A	160(96.39%)	6(3.61%)	140(86.42%)	22(13.58%)	0.00243124
MDN1	153(92.17%)	13(7.83%)	130(80.25%)	32(19.75%)	0.00291043
ITPR3	161(96.99%)	5(3.01%)	142(87.65%)	20(12.35%)	0.00291193
ZFP36L2	153(92.17%)	13(7.83%)	161(99.38%)	1(0.62%)	0.0030936
LRP1	159(95.78%)	7(4.22%)	139(85.8%)	23(14.2%)	0.00324573
GRM6	162(97.59%)	4(2.41%)	144(88.89%)	18(11.11%)	0.00340107
FER1L5	162(97.59%)	4(2.41%)	144(88.89%)	18(11.11%)	0.00340107
SPEF2	162(97.59%)	4(2.41%)	144(88.89%)	18(11.11%)	0.00340107
PCDH17	154(92.77%)	12(7.23%)	132(81.48%)	30(18.52%)	0.00380339
C3	163(98.19%)	3(1.81%)	146(90.12%)	16(9.88%)	0.00383594
LARP4B	160(96.39%)	6(3.61%)	141(87.04%)	21(12.96%)	0.00399052
IGSF9B	160(96.39%)	6(3.61%)	141(87.04%)	21(12.96%)	0.00399052
SPEN	160(96.39%)	6(3.61%)	141(87.04%)	21(12.96%)	0.00399052
RP1L1	160(96.39%)	6(3.61%)	141(87.04%)	21(12.96%)	0.00399052
DDX60L	160(96.39%)	6(3.61%)	141(87.04%)	21(12.96%)	0.00399052
SSPO	156(93.98%)	10(6.02%)	135(83.33%)	27(16.67%)	0.00408434
ITSN2	164(98.8%)	2(1.2%)	148(91.36%)	14(8.64%)	0.00410653
PHRF1	164(98.8%)	2(1.2%)	148(91.36%)	14(8.64%)	0.00410653
KIAA0556	164(98.8%)	2(1.2%)	148(91.36%)	14(8.64%)	0.00410653
AKAP9	158(95.18%)	8(4.82%)	138(85.19%)	24(14.81%)	0.00418146
ZNF831	161(96.99%)	5(3.01%)	143(88.27%)	19(11.73%)	0.00482277
CACNA1C	161(96.99%)	5(3.01%)	143(88.27%)	19(11.73%)	0.00482277
SPHKAP	161(96.99%)	5(3.01%)	143(88.27%)	19(11.73%)	0.00482277
DSCAML1	157(94.58%)	9(5.42%)	137(84.57%)	25(15.43%)	0.00523065
PLXNA4	159(95.78%)	7(4.22%)	140(86.42%)	22(13.58%)	0.00524023
PCDHB7	162(97.59%)	4(2.41%)	145(89.51%)	17(10.49%)	0.00569812
NBEAL1	162(97.59%)	4(2.41%)	145(89.51%)	17(10.49%)	0.00569812
CSMD2	154(92.77%)	12(7.23%)	133(82.1%)	29(17.9%)	0.00586936
SPTA1	154(92.77%)	12(7.23%)	133(82.1%)	29(17.9%)	0.00586936
FMN2	156(93.98%)	10(6.02%)	136(83.95%)	26(16.05%)	0.00638386
NFASC	156(93.98%)	10(6.02%)	136(83.95%)	26(16.05%)	0.00638386
YLPM1	160(96.39%)	6(3.61%)	142(87.65%)	20(12.35%)	0.00648885
MYO18B	160(96.39%)	6(3.61%)	142(87.65%)	20(12.35%)	0.00648885
ZNFX1	163(98.19%)	3(1.81%)	147(90.74%)	15(9.26%)	0.00652112
ARHGEF26	163(98.19%)	3(1.81%)	147(90.74%)	15(9.26%)	0.00652112
MLK4	163(98.19%)	3(1.81%)	147(90.74%)	15(9.26%)	0.00652112
MBD5	163(98.19%)	3(1.81%)	147(90.74%)	15(9.26%)	0.00652112
DNAJC13	163(98.19%)	3(1.81%)	147(90.74%)	15(9.26%)	0.00652112
CCDC88A	163(98.19%)	3(1.81%)	147(90.74%)	15(9.26%)	0.00652112
TET3	163(98.19%)	3(1.81%)	147(90.74%)	15(9.26%)	0.00652112
XYLT2	163(98.19%)	3(1.81%)	147(90.74%)	15(9.26%)	0.00652112
CKAP5	163(98.19%)	3(1.81%)	147(90.74%)	15(9.26%)	0.00652112
DPP6	163(98.19%)	3(1.81%)	147(90.74%)	15(9.26%)	0.00652112
XIRP2	153(92.17%)	13(7.83%)	132(81.48%)	30(18.52%)	0.00685985
PITPNM3	164(98.8%)	2(1.2%)	149(91.98%)	13(8.02%)	0.00710923
KCNB1	164(98.8%)	2(1.2%)	149(91.98%)	13(8.02%)	0.00710923
KDM2B	164(98.8%)	2(1.2%)	149(91.98%)	13(8.02%)	0.00710923
PCDHGA6	164(98.8%)	2(1.2%)	149(91.98%)	13(8.02%)	0.00710923
DCTN1	164(98.8%)	2(1.2%)	149(91.98%)	13(8.02%)	0.00710923
CEP350	164(98.8%)	2(1.2%)	149(91.98%)	13(8.02%)	0.00710923
CTNND2	164(98.8%)	2(1.2%)	149(91.98%)	13(8.02%)	0.00710923
KIF13A	164(98.8%)	2(1.2%)	149(91.98%)	13(8.02%)	0.00710923
ABCA13	146(87.95%)	20(12.05%)	123(75.93%)	39(24.07%)	0.00711748
MACF1	155(93.37%)	11(6.63%)	135(83.33%)	27(16.67%)	0.00763071
RANBP2	161(96.99%)	5(3.01%)	144(88.89%)	18(11.11%)	0.00791555
ZNF292	161(96.99%)	5(3.01%)	144(88.89%)	18(11.11%)	0.00791555
PTPRC	161(96.99%)	5(3.01%)	144(88.89%)	18(11.11%)	0.00791555
LAMA2	157(94.58%)	9(5.42%)	138(85.19%)	24(14.81%)	0.00819683
FRYL	159(95.78%)	7(4.22%)	141(87.04%)	21(12.96%)	0.00837583
SORL1	162(97.59%)	4(2.41%)	146(90.12%)	16(9.88%)	0.00946591
BRINP1	162(97.59%)	4(2.41%)	146(90.12%)	16(9.88%)	0.00946591
CROCC	162(97.59%)	4(2.41%)	146(90.12%)	16(9.88%)	0.00946591
ZNF835	162(97.59%)	4(2.41%)	146(90.12%)	16(9.88%)	0.00946591
SPTBN2	162(97.59%)	4(2.41%)	146(90.12%)	16(9.88%)	0.00946591
DOCK10	162(97.59%)	4(2.41%)	146(90.12%)	16(9.88%)	0.00946591
RTL1	162(97.59%)	4(2.41%)	146(90.12%)	16(9.88%)	0.00946591
CEP192	162(97.59%)	4(2.41%)	146(90.12%)	16(9.88%)	0.00946591
CHD3	162(97.59%)	4(2.41%)	146(90.12%)	16(9.88%)	0.00946591
SPECC1	162(97.59%)	4(2.41%)	146(90.12%)	16(9.88%)	0.00946591
PTPRU	162(97.59%)	4(2.41%)	146(90.12%)	16(9.88%)	0.00946591
SHANK2	162(97.59%)	4(2.41%)	146(90.12%)	16(9.88%)	0.00946591
PCF11	162(97.59%)	4(2.41%)	146(90.12%)	16(9.88%)	0.00946591
TNS1	160(96.39%)	6(3.61%)	143(88.27%)	19(11.73%)	0.0104468
EP400	160(96.39%)	6(3.61%)	143(88.27%)	19(11.73%)	0.0104468
DNAH6	160(96.39%)	6(3.61%)	143(88.27%)	19(11.73%)	0.0104468
LAMA5	160(96.39%)	6(3.61%)	143(88.27%)	19(11.73%)	0.0104468
HSPG2	160(96.39%)	6(3.61%)	143(88.27%)	19(11.73%)	0.0104468
UTRN	160(96.39%)	6(3.61%)	143(88.27%)	19(11.73%)	0.0104468
CHD8	160(96.39%)	6(3.61%)	143(88.27%)	19(11.73%)	0.0104468
BCL9	158(95.18%)	8(4.82%)	140(86.42%)	22(13.58%)	0.0104571
PCDHA2	158(95.18%)	8(4.82%)	140(86.42%)	22(13.58%)	0.0104571
SVIL	158(95.18%)	8(4.82%)	140(86.42%)	22(13.58%)	0.0104571
MEGF8	158(95.18%)	8(4.82%)	140(86.42%)	22(13.58%)	0.0104571
PLEC	158(95.18%)	8(4.82%)	140(86.42%)	22(13.58%)	0.0104571
ASH1L	158(95.18%)	8(4.82%)	140(86.42%)	22(13.58%)	0.0104571
UBR5	163(98.19%)	3(1.81%)	148(91.36%)	14(8.64%)	0.0110035
ANKRD26	163(98.19%)	3(1.81%)	148(91.36%)	14(8.64%)	0.0110035
EP300	163(98.19%)	3(1.81%)	148(91.36%)	14(8.64%)	0.0110035
PCDHGA7	163(98.19%)	3(1.81%)	148(91.36%)	14(8.64%)	0.0110035
CALD1	163(98.19%)	3(1.81%)	148(91.36%)	14(8.64%)	0.0110035
DOCK11	163(98.19%)	3(1.81%)	148(91.36%)	14(8.64%)	0.0110035
COL12A1	155(93.37%)	11(6.63%)	136(83.95%)	26(16.05%)	0.0116533
ANK3	152(91.57%)	14(8.43%)	132(81.48%)	30(18.52%)	0.011825
BMPR2	157(94.58%)	9(5.42%)	139(85.8%)	23(14.2%)	0.0127049
FSIP2	161(96.99%)	5(3.01%)	145(89.51%)	17(10.49%)	0.0128661
ALMS1	161(96.99%)	5(3.01%)	145(89.51%)	17(10.49%)	0.0128661
TRPM3	161(96.99%)	5(3.01%)	145(89.51%)	17(10.49%)	0.0128661
PLXNB1	161(96.99%)	5(3.01%)	145(89.51%)	17(10.49%)	0.0128661
DOCK8	161(96.99%)	5(3.01%)	145(89.51%)	17(10.49%)	0.0128661
ZAN	161(96.99%)	5(3.01%)	145(89.51%)	17(10.49%)	0.0128661
CHD9	159(95.78%)	7(4.22%)	142(87.65%)	20(12.35%)	0.0132459
TNC	159(95.78%)	7(4.22%)	142(87.65%)	20(12.35%)	0.0132459
IGF2R	159(95.78%)	7(4.22%)	142(87.65%)	20(12.35%)	0.0132459
A2ML1	159(95.78%)	7(4.22%)	142(87.65%)	20(12.35%)	0.0132459
LRP1B	147(88.55%)	19(11.45%)	126(77.78%)	36(22.22%)	0.0137352
ZFHX4	141(84.94%)	25(15.06%)	119(73.46%)	43(26.54%)	0.0151559
HYDIN	153(92.17%)	13(7.83%)	134(82.72%)	28(17.28%)	0.0154756
AHNAK2	153(92.17%)	13(7.83%)	134(82.72%)	28(17.28%)	0.0154756
ITPR2	162(97.59%)	4(2.41%)	147(90.74%)	15(9.26%)	0.015581
LAMC3	162(97.59%)	4(2.41%)	147(90.74%)	15(9.26%)	0.015581
CPAMD8	162(97.59%)	4(2.41%)	147(90.74%)	15(9.26%)	0.015581
MUC6	162(97.59%)	4(2.41%)	147(90.74%)	15(9.26%)	0.015581
DENND4B	162(97.59%)	4(2.41%)	147(90.74%)	15(9.26%)	0.015581
CPS1	162(97.59%)	4(2.41%)	147(90.74%)	15(9.26%)	0.015581
TRPC3	162(97.59%)	4(2.41%)	147(90.74%)	15(9.26%)	0.015581
BTBD11	162(97.59%)	4(2.41%)	147(90.74%)	15(9.26%)	0.015581
WWC3	162(97.59%)	4(2.41%)	147(90.74%)	15(9.26%)	0.015581
SMCHD1	162(97.59%)	4(2.41%)	147(90.74%)	15(9.26%)	0.015581
PCNX	162(97.59%)	4(2.41%)	147(90.74%)	15(9.26%)	0.015581
TRRAP	158(95.18%)	8(4.82%)	141(87.04%)	21(12.96%)	0.016267
HERC1	158(95.18%)	8(4.82%)	141(87.04%)	21(12.96%)	0.016267
CDH23	160(96.39%)	6(3.61%)	144(88.89%)	18(11.11%)	0.0166408
HELZ2	160(96.39%)	6(3.61%)	144(88.89%)	18(11.11%)	0.0166408
MYO7A	160(96.39%)	6(3.61%)	144(88.89%)	18(11.11%)	0.0166408
KIF26B	160(96.39%)	6(3.61%)	144(88.89%)	18(11.11%)	0.0166408
SIPA1L1	160(96.39%)	6(3.61%)	144(88.89%)	18(11.11%)	0.0166408
FHOD3	160(96.39%)	6(3.61%)	144(88.89%)	18(11.11%)	0.0166408
AKAP6	160(96.39%)	6(3.61%)	144(88.89%)	18(11.11%)	0.0166408
LRRC7	160(96.39%)	6(3.61%)	144(88.89%)	18(11.11%)	0.0166408
SETX	160(96.39%)	6(3.61%)	144(88.89%)	18(11.11%)	0.0166408
PAPPA	160(96.39%)	6(3.61%)	144(88.89%)	18(11.11%)	0.0166408
ROCK1	163(98.19%)	3(1.81%)	149(91.98%)	13(8.02%)	0.0184152
MYT1L	163(98.19%)	3(1.81%)	149(91.98%)	13(8.02%)	0.0184152
ITGAX	163(98.19%)	3(1.81%)	149(91.98%)	13(8.02%)	0.0184152
RAD51AP2	163(98.19%)	3(1.81%)	149(91.98%)	13(8.02%)	0.0184152
TPO	163(98.19%)	3(1.81%)	149(91.98%)	13(8.02%)	0.0184152
CDON	163(98.19%)	3(1.81%)	149(91.98%)	13(8.02%)	0.0184152
NOS3	163(98.19%)	3(1.81%)	149(91.98%)	13(8.02%)	0.0184152
PCDHA11	161(96.99%)	5(3.01%)	146(90.12%)	16(9.88%)	0.0206943
BAHCC1	161(96.99%)	5(3.01%)	146(90.12%)	16(9.88%)	0.0206943
NRXN3	161(96.99%)	5(3.01%)	146(90.12%)	16(9.88%)	0.0206943
DIDO1	161(96.99%)	5(3.01%)	146(90.12%)	16(9.88%)	0.0206943
EPG5	161(96.99%)	5(3.01%)	146(90.12%)	16(9.88%)	0.0206943
NYAP2	161(96.99%)	5(3.01%)	146(90.12%)	16(9.88%)	0.0206943
CACNA1G	161(96.99%)	5(3.01%)	146(90.12%)	16(9.88%)	0.0206943
HCN4	161(96.99%)	5(3.01%)	146(90.12%)	16(9.88%)	0.0206943
ABCB1	161(96.99%)	5(3.01%)	146(90.12%)	16(9.88%)	0.0206943
TCERG1	159(95.78%)	7(4.22%)	143(88.27%)	19(11.73%)	0.0207116
CMYA5	159(95.78%)	7(4.22%)	143(88.27%)	19(11.73%)	0.0207116
SCN11A	159(95.78%)	7(4.22%)	143(88.27%)	19(11.73%)	0.0207116
FBN1	159(95.78%)	7(4.22%)	143(88.27%)	19(11.73%)	0.0207116
SDK1	150(90.36%)	16(9.64%)	131(80.86%)	31(19.14%)	0.0216308
FLNC	156(93.98%)	10(6.02%)	139(85.8%)	23(14.2%)	0.0228034
DNAH11	145(87.35%)	21(12.65%)	125(77.16%)	37(22.84%)	0.0230022
COL7A1	158(95.18%)	8(4.82%)	142(87.65%)	20(12.35%)	0.0250071
ANKRD11	158(95.18%)	8(4.82%)	142(87.65%)	20(12.35%)	0.0250071
TTC28	162(97.59%)	4(2.41%)	148(91.36%)	14(8.64%)	0.0253895
COL5A2	162(97.59%)	4(2.41%)	148(91.36%)	14(8.64%)	0.0253895
CFH	162(97.59%)	4(2.41%)	148(91.36%)	14(8.64%)	0.0253895
PPL	162(97.59%)	4(2.41%)	148(91.36%)	14(8.64%)	0.0253895
ENAM	162(97.59%)	4(2.41%)	148(91.36%)	14(8.64%)	0.0253895
FASN	162(97.59%)	4(2.41%)	148(91.36%)	14(8.64%)	0.0253895
MYO7B	162(97.59%)	4(2.41%)	148(91.36%)	14(8.64%)	0.0253895
ZMYM6	162(97.59%)	4(2.41%)	148(91.36%)	14(8.64%)	0.0253895
CDH2	160(96.39%)	6(3.61%)	145(89.51%)	17(10.49%)	0.0262056
STAB1	160(96.39%)	6(3.61%)	145(89.51%)	17(10.49%)	0.0262056
DMXL2	160(96.39%)	6(3.61%)	145(89.51%)	17(10.49%)	0.0262056
BCL9L	160(96.39%)	6(3.61%)	145(89.51%)	17(10.49%)	0.0262056
EPHA3	160(96.39%)	6(3.61%)	145(89.51%)	17(10.49%)	0.0262056
KALRN	160(96.39%)	6(3.61%)	145(89.51%)	17(10.49%)	0.0262056
TNN	160(96.39%)	6(3.61%)	145(89.51%)	17(10.49%)	0.0262056
SETBP1	160(96.39%)	6(3.61%)	145(89.51%)	17(10.49%)	0.0262056
FLNA	160(96.39%)	6(3.61%)	145(89.51%)	17(10.49%)	0.0262056
WDR87	155(93.37%)	11(6.63%)	138(85.19%)	24(14.81%)	0.0262426
LRRK2	155(93.37%)	11(6.63%)	138(85.19%)	24(14.81%)	0.0262426
DCHS1	155(93.37%)	11(6.63%)	138(85.19%)	24(14.81%)	0.0262426
DCHS2	151(90.96%)	15(9.04%)	133(82.1%)	29(17.9%)	0.0282877
SCN1A	157(94.58%)	9(5.42%)	141(87.04%)	21(12.96%)	0.0294641
MAP2	157(94.58%)	9(5.42%)	141(87.04%)	21(12.96%)	0.0294641
GRIN2A	157(94.58%)	9(5.42%)	141(87.04%)	21(12.96%)	0.0294641
RYR2	141(84.94%)	25(15.06%)	121(74.69%)	41(25.31%)	0.0294883
RNF43	154(92.77%)	12(7.23%)	137(84.57%)	25(15.43%)	0.0297524
DNAH2	154(92.77%)	12(7.23%)	137(84.57%)	25(15.43%)	0.0297524
VPS13B	154(92.77%)	12(7.23%)	137(84.57%)	25(15.43%)	0.0297524
MKL1	163(98.19%)	3(1.81%)	150(92.59%)	12(7.41%)	0.0305398
HCFC1	163(98.19%)	3(1.81%)	150(92.59%)	12(7.41%)	0.0305398
VWA8	163(98.19%)	3(1.81%)	150(92.59%)	12(7.41%)	0.0305398
WNK2	163(98.19%)	3(1.81%)	150(92.59%)	12(7.41%)	0.0305398
VWDE	163(98.19%)	3(1.81%)	150(92.59%)	12(7.41%)	0.0305398
TNRC18	163(98.19%)	3(1.81%)	150(92.59%)	12(7.41%)	0.0305398
PIKFYVE	163(98.19%)	3(1.81%)	150(92.59%)	12(7.41%)	0.0305398
ARID1A	150(90.36%)	16(9.64%)	132(81.48%)	30(18.52%)	0.0310418
CDK12	159(95.78%)	7(4.22%)	144(88.89%)	18(11.11%)	0.0319949
TNRC6B	159(95.78%)	7(4.22%)	144(88.89%)	18(11.11%)	0.0319949
CIC	159(95.78%)	7(4.22%)	144(88.89%)	18(11.11%)	0.0319949
ROS1	159(95.78%)	7(4.22%)	144(88.89%)	18(11.11%)	0.0319949
REV3L	159(95.78%)	7(4.22%)	144(88.89%)	18(11.11%)	0.0319949
DNAH12	159(95.78%)	7(4.22%)	144(88.89%)	18(11.11%)	0.0319949
STAB2	161(96.99%)	5(3.01%)	147(90.74%)	15(9.26%)	0.0329073
ARFGEF1	161(96.99%)	5(3.01%)	147(90.74%)	15(9.26%)	0.0329073
BRCA2	161(96.99%)	5(3.01%)	147(90.74%)	15(9.26%)	0.0329073
TRPM6	161(96.99%)	5(3.01%)	147(90.74%)	15(9.26%)	0.0329073
DIP2A	161(96.99%)	5(3.01%)	147(90.74%)	15(9.26%)	0.0329073
SMTN	161(96.99%)	5(3.01%)	147(90.74%)	15(9.26%)	0.0329073
MBD6	161(96.99%)	5(3.01%)	147(90.74%)	15(9.26%)	0.0329073
ZNF462	161(96.99%)	5(3.01%)	147(90.74%)	15(9.26%)	0.0329073
FAM179A	161(96.99%)	5(3.01%)	147(90.74%)	15(9.26%)	0.0329073
ADAMTS9	161(96.99%)	5(3.01%)	147(90.74%)	15(9.26%)	0.0329073
BAZ1A	161(96.99%)	5(3.01%)	147(90.74%)	15(9.26%)	0.0329073
KMT2B	153(92.17%)	13(7.83%)	136(83.95%)	26(16.05%)	0.0333053
DST	153(92.17%)	13(7.83%)	136(83.95%)	26(16.05%)	0.0333053
USH2A	149(89.76%)	17(10.24%)	131(80.86%)	31(19.14%)	0.0337986
COL6A6	156(93.98%)	10(6.02%)	140(86.42%)	22(13.58%)	0.0340285
MXRA5	156(93.98%)	10(6.02%)	140(86.42%)	22(13.58%)	0.0340285
TRPS1	152(91.57%)	14(8.43%)	135(83.33%)	27(16.67%)	0.0368778
ATRX	158(95.18%)	8(4.82%)	143(88.27%)	19(11.73%)	0.0379619
PCNT	158(95.18%)	8(4.82%)	143(88.27%)	19(11.73%)	0.0379619
CELSR1	158(95.18%)	8(4.82%)	143(88.27%)	19(11.73%)	0.0379619
COL27A1	158(95.18%)	8(4.82%)	143(88.27%)	19(11.73%)	0.0379619
KCNH7	160(96.39%)	6(3.61%)	146(90.12%)	16(9.88%)	0.0407604
PCDHA13	160(96.39%)	6(3.61%)	146(90.12%)	16(9.88%)	0.0407604
PKDREJ	160(96.39%)	6(3.61%)	146(90.12%)	16(9.88%)	0.0407604
XIRP1	160(96.39%)	6(3.61%)	146(90.12%)	16(9.88%)	0.0407604
ATP8A2	160(96.39%)	6(3.61%)	146(90.12%)	16(9.88%)	0.0407604
ARAP2	160(96.39%)	6(3.61%)	146(90.12%)	16(9.88%)	0.0407604
GCN1L1	160(96.39%)	6(3.61%)	146(90.12%)	16(9.88%)	0.0407604
STAG1	162(97.59%)	4(2.41%)	149(91.98%)	13(8.02%)	0.0409141
CHD5	162(97.59%)	4(2.41%)	149(91.98%)	13(8.02%)	0.0409141
PRUNE2	162(97.59%)	4(2.41%)	149(91.98%)	13(8.02%)	0.0409141
ADGRB1	162(97.59%)	4(2.41%)	149(91.98%)	13(8.02%)	0.0409141
TRANK1	162(97.59%)	4(2.41%)	149(91.98%)	13(8.02%)	0.0409141
GRID2	162(97.59%)	4(2.41%)	149(91.98%)	13(8.02%)	0.0409141
ADAMTS17	162(97.59%)	4(2.41%)	149(91.98%)	13(8.02%)	0.0409141
TACC2	162(97.59%)	4(2.41%)	149(91.98%)	13(8.02%)	0.0409141
PCDH12	162(97.59%)	4(2.41%)	149(91.98%)	13(8.02%)	0.0409141
TLE4	162(97.59%)	4(2.41%)	149(91.98%)	13(8.02%)	0.0409141
CENPE	162(97.59%)	4(2.41%)	149(91.98%)	13(8.02%)	0.0409141
ARAP1	162(97.59%)	4(2.41%)	149(91.98%)	13(8.02%)	0.0409141
KIAA0922	162(97.59%)	4(2.41%)	149(91.98%)	13(8.02%)	0.0409141
RASGRF1	162(97.59%)	4(2.41%)	149(91.98%)	13(8.02%)	0.0409141
OR6K2	162(97.59%)	4(2.41%)	149(91.98%)	13(8.02%)	0.0409141
CFAP43	162(97.59%)	4(2.41%)	149(91.98%)	13(8.02%)	0.0409141
AGRN	162(97.59%)	4(2.41%)	149(91.98%)	13(8.02%)	0.0409141
MYO1F	162(97.59%)	4(2.41%)	149(91.98%)	13(8.02%)	0.0409141
ABCA3	162(97.59%)	4(2.41%)	149(91.98%)	13(8.02%)	0.0409141
GPR158	162(97.59%)	4(2.41%)	149(91.98%)	13(8.02%)	0.0409141
KIAA1549	162(97.59%)	4(2.41%)	149(91.98%)	13(8.02%)	0.0409141
CDH12	162(97.59%)	4(2.41%)	149(91.98%)	13(8.02%)	0.0409141
APOB	154(92.77%)	12(7.23%)	138(85.19%)	24(14.81%)	0.0433042
KMT2D	150(90.36%)	16(9.64%)	133(82.1%)	29(17.9%)	0.0440038
LAMA1	153(92.17%)	13(7.83%)	137(84.57%)	25(15.43%)	0.0479461
ACACB	159(95.78%)	7(4.22%)	145(89.51%)	17(10.49%)	0.0487855
ZNF106	159(95.78%)	7(4.22%)	145(89.51%)	17(10.49%)	0.0487855
PTPRK	159(95.78%)	7(4.22%)	145(89.51%)	17(10.49%)	0.0487855
GRM5	159(95.78%)	7(4.22%)	145(89.51%)	17(10.49%)	0.0487855
SDK2	156(93.98%)	10(6.02%)	141(87.04%)	21(12.96%)	0.0501173
BSN	156(93.98%)	10(6.02%)	141(87.04%)	21(12.96%)	0.0501173
RIF1	156(93.98%)	10(6.02%)	141(87.04%)	21(12.96%)	0.0501173
MYO10	163(98.19%)	3(1.81%)	151(93.21%)	11(6.79%)	0.0501289
CEP295	163(98.19%)	3(1.81%)	151(93.21%)	11(6.79%)	0.0501289
DHX16	163(98.19%)	3(1.81%)	151(93.21%)	11(6.79%)	0.0501289
NUP210	163(98.19%)	3(1.81%)	151(93.21%)	11(6.79%)	0.0501289
PBRM1	163(98.19%)	3(1.81%)	151(93.21%)	11(6.79%)	0.0501289
CEP162	163(98.19%)	3(1.81%)	151(93.21%)	11(6.79%)	0.0501289
OTOF	161(96.99%)	5(3.01%)	148(91.36%)	14(8.64%)	0.0516761
PPP1R26	161(96.99%)	5(3.01%)	148(91.36%)	14(8.64%)	0.0516761
GPR179	161(96.99%)	5(3.01%)	148(91.36%)	14(8.64%)	0.0516761
TSHZ2	161(96.99%)	5(3.01%)	148(91.36%)	14(8.64%)	0.0516761
EPHB1	161(96.99%)	5(3.01%)	148(91.36%)	14(8.64%)	0.0516761
ANKHD1-EIF4EBP3	161(96.99%)	5(3.01%)	148(91.36%)	14(8.64%)	0.0516761
KSR2	161(96.99%)	5(3.01%)	148(91.36%)	14(8.64%)	0.0516761
MON2	161(96.99%)	5(3.01%)	148(91.36%)	14(8.64%)	0.0516761
NSD1	161(96.99%)	5(3.01%)	148(91.36%)	14(8.64%)	0.0516761
MAGI1	161(96.99%)	5(3.01%)	148(91.36%)	14(8.64%)	0.0516761
ATP8B2	161(96.99%)	5(3.01%)	148(91.36%)	14(8.64%)	0.0516761
HDAC9	161(96.99%)	5(3.01%)	148(91.36%)	14(8.64%)	0.0516761
EML6	161(96.99%)	5(3.01%)	148(91.36%)	14(8.64%)	0.0516761
PTPRM	161(96.99%)	5(3.01%)	148(91.36%)	14(8.64%)	0.0516761
PCDHA9	161(96.99%)	5(3.01%)	148(91.36%)	14(8.64%)	0.0516761
USP28	161(96.99%)	5(3.01%)	148(91.36%)	14(8.64%)	0.0516761
SNX13	161(96.99%)	5(3.01%)	148(91.36%)	14(8.64%)	0.0516761
DLC1	161(96.99%)	5(3.01%)	148(91.36%)	14(8.64%)	0.0516761
ARHGAP20	161(96.99%)	5(3.01%)	148(91.36%)	14(8.64%)	0.0516761
SETD1B	161(96.99%)	5(3.01%)	148(91.36%)	14(8.64%)	0.0516761
CTTNBP2	161(96.99%)	5(3.01%)	148(91.36%)	14(8.64%)	0.0516761
DLGAP2	161(96.99%)	5(3.01%)	148(91.36%)	14(8.64%)	0.0516761
RYR3	147(88.55%)	19(11.45%)	130(80.25%)	32(19.75%)	0.0544292
FAT3	147(88.55%)	19(11.45%)	130(80.25%)	32(19.75%)	0.0544292
BRAF	147(88.55%)	19(11.45%)	130(80.25%)	32(19.75%)	0.0544292
WDFY4	155(93.37%)	11(6.63%)	140(86.42%)	22(13.58%)	0.0561881
TSHZ3	155(93.37%)	11(6.63%)	140(86.42%)	22(13.58%)	0.0561881
BIRC6	155(93.37%)	11(6.63%)	140(86.42%)	22(13.58%)	0.0561881
USP9X	158(95.18%)	8(4.82%)	144(88.89%)	18(11.11%)	0.0568579
SPTB	158(95.18%)	8(4.82%)	144(88.89%)	18(11.11%)	0.0568579
MKI67	158(95.18%)	8(4.82%)	144(88.89%)	18(11.11%)	0.0568579
CUL9	158(95.18%)	8(4.82%)	144(88.89%)	18(11.11%)	0.0568579
HECW1	158(95.18%)	8(4.82%)	144(88.89%)	18(11.11%)	0.0568579
TCF7L2	158(95.18%)	8(4.82%)	144(88.89%)	18(11.11%)	0.0568579
ATM	150(90.36%)	16(9.64%)	134(82.72%)	28(17.28%)	0.0615919
GLI3	154(92.77%)	12(7.23%)	139(85.8%)	23(14.2%)	0.0621966
FRMPD1	160(96.39%)	6(3.61%)	147(90.74%)	15(9.26%)	0.0625514
ADAMTSL1	160(96.39%)	6(3.61%)	147(90.74%)	15(9.26%)	0.0625514
EIF3A	160(96.39%)	6(3.61%)	147(90.74%)	15(9.26%)	0.0625514
SHPRH	160(96.39%)	6(3.61%)	147(90.74%)	15(9.26%)	0.0625514
SHANK1	160(96.39%)	6(3.61%)	147(90.74%)	15(9.26%)	0.0625514
GREB1	160(96.39%)	6(3.61%)	147(90.74%)	15(9.26%)	0.0625514
OSMR	160(96.39%)	6(3.61%)	147(90.74%)	15(9.26%)	0.0625514
TRHDE	160(96.39%)	6(3.61%)	147(90.74%)	15(9.26%)	0.0625514
PCNXL2	160(96.39%)	6(3.61%)	147(90.74%)	15(9.26%)	0.0625514
ADAMTS2	160(96.39%)	6(3.61%)	147(90.74%)	15(9.26%)	0.0625514
NUP205	160(96.39%)	6(3.61%)	147(90.74%)	15(9.26%)	0.0625514
NCOR2	157(94.58%)	9(5.42%)	143(88.27%)	19(11.73%)	0.0648843
NAV3	157(94.58%)	9(5.42%)	143(88.27%)	19(11.73%)	0.0648843
MECOM	162(97.59%)	4(2.41%)	150(92.59%)	12(7.41%)	0.0651156
SMARCA4	162(97.59%)	4(2.41%)	150(92.59%)	12(7.41%)	0.0651156
ARHGAP21	162(97.59%)	4(2.41%)	150(92.59%)	12(7.41%)	0.0651156
GON4L	162(97.59%)	4(2.41%)	150(92.59%)	12(7.41%)	0.0651156
RAI1	162(97.59%)	4(2.41%)	150(92.59%)	12(7.41%)	0.0651156
ADGRG4	162(97.59%)	4(2.41%)	150(92.59%)	12(7.41%)	0.0651156
USP7	162(97.59%)	4(2.41%)	150(92.59%)	12(7.41%)	0.0651156
UNC13A	162(97.59%)	4(2.41%)	150(92.59%)	12(7.41%)	0.0651156
ABCA8	162(97.59%)	4(2.41%)	150(92.59%)	12(7.41%)	0.0651156
KMT2C	153(92.17%)	13(7.83%)	138(85.19%)	24(14.81%)	0.0681114
KIAA1109	153(92.17%)	13(7.83%)	138(85.19%)	24(14.81%)	0.0681114
MYCBP2	153(92.17%)	13(7.83%)	138(85.19%)	24(14.81%)	0.0681114
FAT4	135(81.33%)	31(18.67%)	117(72.22%)	45(27.78%)	0.0683493
VCAN	156(93.98%)	10(6.02%)	142(87.65%)	20(12.35%)	0.0727964
POLE	159(95.78%)	7(4.22%)	146(90.12%)	16(9.88%)	0.0733491
NWD2	159(95.78%)	7(4.22%)	146(90.12%)	16(9.88%)	0.0733491
F8	159(95.78%)	7(4.22%)	146(90.12%)	16(9.88%)	0.0733491
PKD1L1	159(95.78%)	7(4.22%)	146(90.12%)	16(9.88%)	0.0733491
CDH9	159(95.78%)	7(4.22%)	146(90.12%)	16(9.88%)	0.0733491
GTF3C1	159(95.78%)	7(4.22%)	146(90.12%)	16(9.88%)	0.0733491
TRIOBP	159(95.78%)	7(4.22%)	146(90.12%)	16(9.88%)	0.0733491
FAM135B	159(95.78%)	7(4.22%)	146(90.12%)	16(9.88%)	0.0733491
COL6A3	152(91.57%)	14(8.43%)	137(84.57%)	25(15.43%)	0.0739091
DNAH17	152(91.57%)	14(8.43%)	137(84.57%)	25(15.43%)	0.0739091
RYR1	147(88.55%)	19(11.45%)	131(80.86%)	31(19.14%)	0.0744971
NLRP4	161(96.99%)	5(3.01%)	149(91.98%)	13(8.02%)	0.0800336
CASC5	161(96.99%)	5(3.01%)	149(91.98%)	13(8.02%)	0.0800336
PRKD1	161(96.99%)	5(3.01%)	149(91.98%)	13(8.02%)	0.0800336
CEP170	161(96.99%)	5(3.01%)	149(91.98%)	13(8.02%)	0.0800336
KCNH1	161(96.99%)	5(3.01%)	149(91.98%)	13(8.02%)	0.0800336
KIRREL3	161(96.99%)	5(3.01%)	149(91.98%)	13(8.02%)	0.0800336
MYH11	161(96.99%)	5(3.01%)	149(91.98%)	13(8.02%)	0.0800336
MED12	161(96.99%)	5(3.01%)	149(91.98%)	13(8.02%)	0.0800336
TPR	161(96.99%)	5(3.01%)	149(91.98%)	13(8.02%)	0.0800336
IGSF9	161(96.99%)	5(3.01%)	149(91.98%)	13(8.02%)	0.0800336
DIP2B	161(96.99%)	5(3.01%)	149(91.98%)	13(8.02%)	0.0800336
CDC42BPA	161(96.99%)	5(3.01%)	149(91.98%)	13(8.02%)	0.0800336
SAMD9	161(96.99%)	5(3.01%)	149(91.98%)	13(8.02%)	0.0800336
NCOR1	161(96.99%)	5(3.01%)	149(91.98%)	13(8.02%)	0.0800336
NID2	161(96.99%)	5(3.01%)	149(91.98%)	13(8.02%)	0.0800336
WWP1	161(96.99%)	5(3.01%)	149(91.98%)	13(8.02%)	0.0800336
LRRK1	161(96.99%)	5(3.01%)	149(91.98%)	13(8.02%)	0.0800336
AP2A2	161(96.99%)	5(3.01%)	149(91.98%)	13(8.02%)	0.0800336
ANKRD12	161(96.99%)	5(3.01%)	149(91.98%)	13(8.02%)	0.0800336
TRPM2	161(96.99%)	5(3.01%)	149(91.98%)	13(8.02%)	0.0800336
ZNF814	161(96.99%)	5(3.01%)	149(91.98%)	13(8.02%)	0.0800336
PCDHGB3	161(96.99%)	5(3.01%)	149(91.98%)	13(8.02%)	0.0800336
RNF6	161(96.99%)	5(3.01%)	149(91.98%)	13(8.02%)	0.0800336
IQCA1	161(96.99%)	5(3.01%)	149(91.98%)	13(8.02%)	0.0800336
NOTCH3	161(96.99%)	5(3.01%)	149(91.98%)	13(8.02%)	0.0800336
ABCA9	161(96.99%)	5(3.01%)	149(91.98%)	13(8.02%)	0.0800336
MUC17	155(93.37%)	11(6.63%)	141(87.04%)	21(12.96%)	0.080545
NBEA	155(93.37%)	11(6.63%)	141(87.04%)	21(12.96%)	0.080545
NYNRIN	163(98.19%)	3(1.81%)	152(93.83%)	10(6.17%)	0.0813179
SMC2	163(98.19%)	3(1.81%)	152(93.83%)	10(6.17%)	0.0813179
PIK3R1	163(98.19%)	3(1.81%)	152(93.83%)	10(6.17%)	0.0813179
CSMD3	145(87.35%)	21(12.65%)	129(79.63%)	33(20.37%)	0.0825699
BNC2	158(95.18%)	8(4.82%)	145(89.51%)	17(10.49%)	0.0839401
CHD6	158(95.18%)	8(4.82%)	145(89.51%)	17(10.49%)	0.0839401
ICE1	158(95.18%)	8(4.82%)	145(89.51%)	17(10.49%)	0.0839401
ZBTB20	158(95.18%)	8(4.82%)	145(89.51%)	17(10.49%)	0.0839401
BCOR	158(95.18%)	8(4.82%)	145(89.51%)	17(10.49%)	0.0839401
EVC2	158(95.18%)	8(4.82%)	145(89.51%)	17(10.49%)	0.0839401
ASPM	154(92.77%)	12(7.23%)	140(86.42%)	22(13.58%)	0.0880955
DNAH5	143(86.14%)	23(13.86%)	127(78.4%)	35(21.6%)	0.0901784
VPS13C	157(94.58%)	9(5.42%)	144(88.89%)	18(11.11%)	0.0942401
ACVR2A	157(94.58%)	9(5.42%)	144(88.89%)	18(11.11%)	0.0942401
PCDHGA2	160(96.39%)	6(3.61%)	148(91.36%)	14(8.64%)	0.0945887
SLIT2	160(96.39%)	6(3.61%)	148(91.36%)	14(8.64%)	0.0945887
SUPT16H	160(96.39%)	6(3.61%)	148(91.36%)	14(8.64%)	0.0945887
TIAM2	160(96.39%)	6(3.61%)	148(91.36%)	14(8.64%)	0.0945887
INSRR	160(96.39%)	6(3.61%)	148(91.36%)	14(8.64%)	0.0945887
RGS12	160(96.39%)	6(3.61%)	148(91.36%)	14(8.64%)	0.0945887
KIAA2018	160(96.39%)	6(3.61%)	148(91.36%)	14(8.64%)	0.0945887
KCNA4	160(96.39%)	6(3.61%)	148(91.36%)	14(8.64%)	0.0945887
DSP	160(96.39%)	6(3.61%)	148(91.36%)	14(8.64%)	0.0945887
GABRA5	160(96.39%)	6(3.61%)	148(91.36%)	14(8.64%)	0.0945887
MYH13	160(96.39%)	6(3.61%)	148(91.36%)	14(8.64%)	0.0945887
ZNF646	160(96.39%)	6(3.61%)	148(91.36%)	14(8.64%)	0.0945887
DNAH9	153(92.17%)	13(7.83%)	139(85.8%)	23(14.2%)	0.0954243
FBN3	153(92.17%)	13(7.83%)	139(85.8%)	23(14.2%)	0.0954243
HMCN1	148(89.16%)	18(10.84%)	133(82.1%)	29(17.9%)	0.095639
TP53	71(42.77%)	95(57.23%)	85(52.47%)	77(47.53%)	0.0993972
SMARCA2	162(97.59%)	4(2.41%)	151(93.21%)	11(6.79%)	0.102185
KIAA1462	162(97.59%)	4(2.41%)	151(93.21%)	11(6.79%)	0.102185
ACE	162(97.59%)	4(2.41%)	151(93.21%)	11(6.79%)	0.102185
EPHA6	162(97.59%)	4(2.41%)	151(93.21%)	11(6.79%)	0.102185
FRMPD3	162(97.59%)	4(2.41%)	151(93.21%)	11(6.79%)	0.102185
SETD1A	162(97.59%)	4(2.41%)	151(93.21%)	11(6.79%)	0.102185
MED13	162(97.59%)	4(2.41%)	151(93.21%)	11(6.79%)	0.102185
ROBO3	162(97.59%)	4(2.41%)	151(93.21%)	11(6.79%)	0.102185
ZNF540	162(97.59%)	4(2.41%)	151(93.21%)	11(6.79%)	0.102185
HRNR	156(93.98%)	10(6.02%)	143(88.27%)	19(11.73%)	0.104196
GRIK2	156(93.98%)	10(6.02%)	143(88.27%)	19(11.73%)	0.104196
SCN3A	156(93.98%)	10(6.02%)	143(88.27%)	19(11.73%)	0.104196
SPAG17	156(93.98%)	10(6.02%)	143(88.27%)	19(11.73%)	0.104196
FRAS1	156(93.98%)	10(6.02%)	143(88.27%)	19(11.73%)	0.104196
SPEG	156(93.98%)	10(6.02%)	143(88.27%)	19(11.73%)	0.104196
LOXHD1	159(95.78%)	7(4.22%)	147(90.74%)	15(9.26%)	0.108612
PCDHA6	159(95.78%)	7(4.22%)	147(90.74%)	15(9.26%)	0.108612
PTPRZ1	159(95.78%)	7(4.22%)	147(90.74%)	15(9.26%)	0.108612
CACNA1F	159(95.78%)	7(4.22%)	147(90.74%)	15(9.26%)	0.108612
MYH6	159(95.78%)	7(4.22%)	147(90.74%)	15(9.26%)	0.108612
KIAA1217	159(95.78%)	7(4.22%)	147(90.74%)	15(9.26%)	0.108612
ATG2B	159(95.78%)	7(4.22%)	147(90.74%)	15(9.26%)	0.108612
KIF21A	159(95.78%)	7(4.22%)	147(90.74%)	15(9.26%)	0.108612
MYO9A	159(95.78%)	7(4.22%)	147(90.74%)	15(9.26%)	0.108612
ZNF804A	159(95.78%)	7(4.22%)	147(90.74%)	15(9.26%)	0.108612
ADCY8	159(95.78%)	7(4.22%)	147(90.74%)	15(9.26%)	0.108612
ACACA	159(95.78%)	7(4.22%)	147(90.74%)	15(9.26%)	0.108612
ZC3H13	155(93.37%)	11(6.63%)	142(87.65%)	20(12.35%)	0.113777
SCN7A	155(93.37%)	11(6.63%)	142(87.65%)	20(12.35%)	0.113777
AKAP13	158(95.18%)	8(4.82%)	146(90.12%)	16(9.88%)	0.122015
SCN2A	158(95.18%)	8(4.82%)	146(90.12%)	16(9.88%)	0.122015
ABCA12	158(95.18%)	8(4.82%)	146(90.12%)	16(9.88%)	0.122015
DOPEY1	158(95.18%)	8(4.82%)	146(90.12%)	16(9.88%)	0.122015
CNTNAP4	158(95.18%)	8(4.82%)	146(90.12%)	16(9.88%)	0.122015
CNTNAP2	158(95.18%)	8(4.82%)	146(90.12%)	16(9.88%)	0.122015
MAP1A	158(95.18%)	8(4.82%)	146(90.12%)	16(9.88%)	0.122015
ZNF98	161(96.99%)	5(3.01%)	150(92.59%)	12(7.41%)	0.122054
CFAP47	161(96.99%)	5(3.01%)	150(92.59%)	12(7.41%)	0.122054
ZNF521	161(96.99%)	5(3.01%)	150(92.59%)	12(7.41%)	0.122054
DENND2C	161(96.99%)	5(3.01%)	150(92.59%)	12(7.41%)	0.122054
KIF26A	161(96.99%)	5(3.01%)	150(92.59%)	12(7.41%)	0.122054
SEL1L3	161(96.99%)	5(3.01%)	150(92.59%)	12(7.41%)	0.122054
HIVEP2	161(96.99%)	5(3.01%)	150(92.59%)	12(7.41%)	0.122054
SZT2	161(96.99%)	5(3.01%)	150(92.59%)	12(7.41%)	0.122054
E2F7	161(96.99%)	5(3.01%)	150(92.59%)	12(7.41%)	0.122054
KIAA0825	161(96.99%)	5(3.01%)	150(92.59%)	12(7.41%)	0.122054
KLHL4	161(96.99%)	5(3.01%)	150(92.59%)	12(7.41%)	0.122054
NCAM1	161(96.99%)	5(3.01%)	150(92.59%)	12(7.41%)	0.122054
HCN1	161(96.99%)	5(3.01%)	150(92.59%)	12(7.41%)	0.122054
MVK	161(96.99%)	5(3.01%)	150(92.59%)	12(7.41%)	0.122054
ITGA10	161(96.99%)	5(3.01%)	150(92.59%)	12(7.41%)	0.122054
LRFN2	161(96.99%)	5(3.01%)	150(92.59%)	12(7.41%)	0.122054
DISP1	161(96.99%)	5(3.01%)	150(92.59%)	12(7.41%)	0.122054
ARHGEF17	161(96.99%)	5(3.01%)	150(92.59%)	12(7.41%)	0.122054
PDS5B	161(96.99%)	5(3.01%)	150(92.59%)	12(7.41%)	0.122054
CDH11	161(96.99%)	5(3.01%)	150(92.59%)	12(7.41%)	0.122054
CWF19L2	161(96.99%)	5(3.01%)	150(92.59%)	12(7.41%)	0.122054
DENND5A	161(96.99%)	5(3.01%)	150(92.59%)	12(7.41%)	0.122054
CHD1	161(96.99%)	5(3.01%)	150(92.59%)	12(7.41%)	0.122054
PTPRT	154(92.77%)	12(7.23%)	141(87.04%)	21(12.96%)	0.122968
TAF1L	154(92.77%)	12(7.23%)	141(87.04%)	21(12.96%)	0.122968
RP1	154(92.77%)	12(7.23%)	141(87.04%)	21(12.96%)	0.122968
SPG11	163(98.19%)	3(1.81%)	153(94.44%)	9(5.56%)	0.130107
RELN	153(92.17%)	13(7.83%)	140(86.42%)	22(13.58%)	0.131764
DNHD1	153(92.17%)	13(7.83%)	140(86.42%)	22(13.58%)	0.131764
NAV2	157(94.58%)	9(5.42%)	145(89.51%)	17(10.49%)	0.134757
VWF	157(94.58%)	9(5.42%)	145(89.51%)	17(10.49%)	0.134757
PCDH18	157(94.58%)	9(5.42%)	145(89.51%)	17(10.49%)	0.134757
ZMYND8	160(96.39%)	6(3.61%)	149(91.98%)	13(8.02%)	0.140735
CTNNA1	160(96.39%)	6(3.61%)	149(91.98%)	13(8.02%)	0.140735
ARHGAP5	160(96.39%)	6(3.61%)	149(91.98%)	13(8.02%)	0.140735
AFF3	160(96.39%)	6(3.61%)	149(91.98%)	13(8.02%)	0.140735
YTHDC2	160(96.39%)	6(3.61%)	149(91.98%)	13(8.02%)	0.140735
THBS2	160(96.39%)	6(3.61%)	149(91.98%)	13(8.02%)	0.140735
CCDC108	160(96.39%)	6(3.61%)	149(91.98%)	13(8.02%)	0.140735
MAST4	160(96.39%)	6(3.61%)	149(91.98%)	13(8.02%)	0.140735
HEATR5B	160(96.39%)	6(3.61%)	149(91.98%)	13(8.02%)	0.140735
FPGT-TNNI3K	160(96.39%)	6(3.61%)	149(91.98%)	13(8.02%)	0.140735
FAM186A	160(96.39%)	6(3.61%)	149(91.98%)	13(8.02%)	0.140735
PCDHA12	156(93.98%)	10(6.02%)	144(88.89%)	18(11.11%)	0.146831
CTNNA2	156(93.98%)	10(6.02%)	144(88.89%)	18(11.11%)	0.146831
SMAD4	151(90.96%)	15(9.04%)	138(85.19%)	24(14.81%)	0.148186
DNAH10	151(90.96%)	15(9.04%)	138(85.19%)	24(14.81%)	0.148186
HERC2	151(90.96%)	15(9.04%)	138(85.19%)	24(14.81%)	0.148186
FLG	144(86.75%)	22(13.25%)	130(80.25%)	32(19.75%)	0.150388
LIFR	162(97.59%)	4(2.41%)	152(93.83%)	10(6.17%)	0.157799
SV2C	162(97.59%)	4(2.41%)	152(93.83%)	10(6.17%)	0.157799
NRG1	162(97.59%)	4(2.41%)	152(93.83%)	10(6.17%)	0.157799
KIAA0195	162(97.59%)	4(2.41%)	152(93.83%)	10(6.17%)	0.157799
KANSL1L	162(97.59%)	4(2.41%)	152(93.83%)	10(6.17%)	0.157799
PCDHA8	159(95.78%)	7(4.22%)	148(91.36%)	14(8.64%)	0.158181
ARID1B	159(95.78%)	7(4.22%)	148(91.36%)	14(8.64%)	0.158181
DAPK1	159(95.78%)	7(4.22%)	148(91.36%)	14(8.64%)	0.158181
COL1A2	159(95.78%)	7(4.22%)	148(91.36%)	14(8.64%)	0.158181
DLG2	159(95.78%)	7(4.22%)	148(91.36%)	14(8.64%)	0.158181
TCEB3B	159(95.78%)	7(4.22%)	148(91.36%)	14(8.64%)	0.158181
MED12L	159(95.78%)	7(4.22%)	148(91.36%)	14(8.64%)	0.158181
CACNA1S	159(95.78%)	7(4.22%)	148(91.36%)	14(8.64%)	0.158181
EPHA5	159(95.78%)	7(4.22%)	148(91.36%)	14(8.64%)	0.158181
CDH10	155(93.37%)	11(6.63%)	143(88.27%)	19(11.73%)	0.158248
MUC5B	149(89.76%)	17(10.24%)	136(83.95%)	26(16.05%)	0.163111
ROBO2	154(92.77%)	12(7.23%)	142(87.65%)	20(12.35%)	0.169029
CNTN6	154(92.77%)	12(7.23%)	142(87.65%)	20(12.35%)	0.169029
TENM2	154(92.77%)	12(7.23%)	142(87.65%)	20(12.35%)	0.169029
MAP3K4	154(92.77%)	12(7.23%)	142(87.65%)	20(12.35%)	0.169029
USP34	158(95.18%)	8(4.82%)	147(90.74%)	15(9.26%)	0.174415
LYST	158(95.18%)	8(4.82%)	147(90.74%)	15(9.26%)	0.174415
DOCK5	158(95.18%)	8(4.82%)	147(90.74%)	15(9.26%)	0.174415
DIP2C	158(95.18%)	8(4.82%)	147(90.74%)	15(9.26%)	0.174415
MYO3A	158(95.18%)	8(4.82%)	147(90.74%)	15(9.26%)	0.174415
C5orf42	158(95.18%)	8(4.82%)	147(90.74%)	15(9.26%)	0.174415
WDFY3	158(95.18%)	8(4.82%)	147(90.74%)	15(9.26%)	0.174415
TULP4	158(95.18%)	8(4.82%)	147(90.74%)	15(9.26%)	0.174415
SETD2	158(95.18%)	8(4.82%)	147(90.74%)	15(9.26%)	0.174415
OTOGL	158(95.18%)	8(4.82%)	147(90.74%)	15(9.26%)	0.174415
DNAH1	153(92.17%)	13(7.83%)	141(87.04%)	21(12.96%)	0.179202
CACHD1	161(96.99%)	5(3.01%)	151(93.21%)	11(6.79%)	0.182937
GRM8	161(96.99%)	5(3.01%)	151(93.21%)	11(6.79%)	0.182937
SVEP1	161(96.99%)	5(3.01%)	151(93.21%)	11(6.79%)	0.182937
ZC3H18	161(96.99%)	5(3.01%)	151(93.21%)	11(6.79%)	0.182937
CHRM2	161(96.99%)	5(3.01%)	151(93.21%)	11(6.79%)	0.182937
GRIK5	161(96.99%)	5(3.01%)	151(93.21%)	11(6.79%)	0.182937
KIAA2026	161(96.99%)	5(3.01%)	151(93.21%)	11(6.79%)	0.182937
PLXNA2	161(96.99%)	5(3.01%)	151(93.21%)	11(6.79%)	0.182937
CNTN4	161(96.99%)	5(3.01%)	151(93.21%)	11(6.79%)	0.182937
PLXNB2	161(96.99%)	5(3.01%)	151(93.21%)	11(6.79%)	0.182937
SRGAP1	161(96.99%)	5(3.01%)	151(93.21%)	11(6.79%)	0.182937
MDGA1	161(96.99%)	5(3.01%)	151(93.21%)	11(6.79%)	0.182937
A2M	161(96.99%)	5(3.01%)	151(93.21%)	11(6.79%)	0.182937
LRFN5	161(96.99%)	5(3.01%)	151(93.21%)	11(6.79%)	0.182937
DAAM2	161(96.99%)	5(3.01%)	151(93.21%)	11(6.79%)	0.182937
NOTCH2	161(96.99%)	5(3.01%)	151(93.21%)	11(6.79%)	0.182937
MSH6	161(96.99%)	5(3.01%)	151(93.21%)	11(6.79%)	0.182937
POLRMT	161(96.99%)	5(3.01%)	151(93.21%)	11(6.79%)	0.182937
USP29	161(96.99%)	5(3.01%)	151(93.21%)	11(6.79%)	0.182937
LTBP4	161(96.99%)	5(3.01%)	151(93.21%)	11(6.79%)	0.182937
CENPF	157(94.58%)	9(5.42%)	146(90.12%)	16(9.88%)	0.189499
ABCA1	157(94.58%)	9(5.42%)	146(90.12%)	16(9.88%)	0.189499
TIAM1	157(94.58%)	9(5.42%)	146(90.12%)	16(9.88%)	0.189499
VPS13A	157(94.58%)	9(5.42%)	146(90.12%)	16(9.88%)	0.189499
PRDM9	157(94.58%)	9(5.42%)	146(90.12%)	16(9.88%)	0.189499
GOLGB1	157(94.58%)	9(5.42%)	146(90.12%)	16(9.88%)	0.189499
CEP290	157(94.58%)	9(5.42%)	146(90.12%)	16(9.88%)	0.189499
CTNNB1	157(94.58%)	9(5.42%)	146(90.12%)	16(9.88%)	0.189499
TENM3	151(90.96%)	15(9.04%)	139(85.8%)	23(14.2%)	0.197849
SACS	151(90.96%)	15(9.04%)	139(85.8%)	23(14.2%)	0.197849
CACNA1E	151(90.96%)	15(9.04%)	139(85.8%)	23(14.2%)	0.197849
TNXB	156(93.98%)	10(6.02%)	145(89.51%)	17(10.49%)	0.203508
PREX2	156(93.98%)	10(6.02%)	145(89.51%)	17(10.49%)	0.203508
DCC	156(93.98%)	10(6.02%)	145(89.51%)	17(10.49%)	0.203508
TEX15	156(93.98%)	10(6.02%)	145(89.51%)	17(10.49%)	0.203508
MTUS2	156(93.98%)	10(6.02%)	145(89.51%)	17(10.49%)	0.203508
BOD1L1	160(96.39%)	6(3.61%)	150(92.59%)	12(7.41%)	0.205671
PSME4	160(96.39%)	6(3.61%)	150(92.59%)	12(7.41%)	0.205671
CDH8	160(96.39%)	6(3.61%)	150(92.59%)	12(7.41%)	0.205671
PCDH19	160(96.39%)	6(3.61%)	150(92.59%)	12(7.41%)	0.205671
CDC42BPB	160(96.39%)	6(3.61%)	150(92.59%)	12(7.41%)	0.205671
TEP1	160(96.39%)	6(3.61%)	150(92.59%)	12(7.41%)	0.205671
RPGRIP1L	160(96.39%)	6(3.61%)	150(92.59%)	12(7.41%)	0.205671
CNTRL	160(96.39%)	6(3.61%)	150(92.59%)	12(7.41%)	0.205671
BRWD1	160(96.39%)	6(3.61%)	150(92.59%)	12(7.41%)	0.205671
FAM179B	160(96.39%)	6(3.61%)	150(92.59%)	12(7.41%)	0.205671
LAMA4	160(96.39%)	6(3.61%)	150(92.59%)	12(7.41%)	0.205671
ITIH2	160(96.39%)	6(3.61%)	150(92.59%)	12(7.41%)	0.205671
KDM3B	160(96.39%)	6(3.61%)	150(92.59%)	12(7.41%)	0.205671
ABCB11	160(96.39%)	6(3.61%)	150(92.59%)	12(7.41%)	0.205671
PTPRD	160(96.39%)	6(3.61%)	150(92.59%)	12(7.41%)	0.205671
CTNNA3	160(96.39%)	6(3.61%)	150(92.59%)	12(7.41%)	0.205671
USP26	160(96.39%)	6(3.61%)	150(92.59%)	12(7.41%)	0.205671
PPFIA2	160(96.39%)	6(3.61%)	150(92.59%)	12(7.41%)	0.205671
KIAA0430	160(96.39%)	6(3.61%)	150(92.59%)	12(7.41%)	0.205671
PRPF8	160(96.39%)	6(3.61%)	150(92.59%)	12(7.41%)	0.205671
MYH1	160(96.39%)	6(3.61%)	150(92.59%)	12(7.41%)	0.205671
UNC13C	150(90.36%)	16(9.64%)	138(85.19%)	24(14.81%)	0.206386
DNAH8	150(90.36%)	16(9.64%)	138(85.19%)	24(14.81%)	0.206386
UNC80	150(90.36%)	16(9.64%)	138(85.19%)	24(14.81%)	0.206386
ANK2	149(89.76%)	17(10.24%)	137(84.57%)	25(15.43%)	0.21444
AMER1	149(89.76%)	17(10.24%)	137(84.57%)	25(15.43%)	0.21444
DSCAM	155(93.37%)	11(6.63%)	144(88.89%)	18(11.11%)	0.216522
PXDN	155(93.37%)	11(6.63%)	144(88.89%)	18(11.11%)	0.216522
TECTA	155(93.37%)	11(6.63%)	144(88.89%)	18(11.11%)	0.216522
KMT2A	155(93.37%)	11(6.63%)	144(88.89%)	18(11.11%)	0.216522
CAMTA1	159(95.78%)	7(4.22%)	149(91.98%)	13(8.02%)	0.226227
UGGT2	159(95.78%)	7(4.22%)	149(91.98%)	13(8.02%)	0.226227
ZNF318	159(95.78%)	7(4.22%)	149(91.98%)	13(8.02%)	0.226227
MGAM	159(95.78%)	7(4.22%)	149(91.98%)	13(8.02%)	0.226227
LCT	159(95.78%)	7(4.22%)	149(91.98%)	13(8.02%)	0.226227
AK9	159(95.78%)	7(4.22%)	149(91.98%)	13(8.02%)	0.226227
FSTL5	159(95.78%)	7(4.22%)	149(91.98%)	13(8.02%)	0.226227
EPB41L3	159(95.78%)	7(4.22%)	149(91.98%)	13(8.02%)	0.226227
CASZ1	159(95.78%)	7(4.22%)	149(91.98%)	13(8.02%)	0.226227
TRIP12	159(95.78%)	7(4.22%)	149(91.98%)	13(8.02%)	0.226227
NBEAL2	159(95.78%)	7(4.22%)	149(91.98%)	13(8.02%)	0.226227
PCDHGA8	159(95.78%)	7(4.22%)	149(91.98%)	13(8.02%)	0.226227
PCDHB3	159(95.78%)	7(4.22%)	149(91.98%)	13(8.02%)	0.226227
ZCCHC11	159(95.78%)	7(4.22%)	149(91.98%)	13(8.02%)	0.226227
PDGFRA	159(95.78%)	7(4.22%)	149(91.98%)	13(8.02%)	0.226227
GRIA2	159(95.78%)	7(4.22%)	149(91.98%)	13(8.02%)	0.226227
KIAA1429	159(95.78%)	7(4.22%)	149(91.98%)	13(8.02%)	0.226227
CNOT1	154(92.77%)	12(7.23%)	143(88.27%)	19(11.73%)	0.22862
SCN9A	154(92.77%)	12(7.23%)	143(88.27%)	19(11.73%)	0.22862
PCDHB1	162(97.59%)	4(2.41%)	153(94.44%)	9(5.56%)	0.239189
DYNC2H1	153(92.17%)	13(7.83%)	142(87.65%)	20(12.35%)	0.239877
CHD7	153(92.17%)	13(7.83%)	142(87.65%)	20(12.35%)	0.239877
EYS	153(92.17%)	13(7.83%)	142(87.65%)	20(12.35%)	0.239877
HECTD4	153(92.17%)	13(7.83%)	142(87.65%)	20(12.35%)	0.239877
AMOTL1	158(95.18%)	8(4.82%)	148(91.36%)	14(8.64%)	0.244843
PLCG2	158(95.18%)	8(4.82%)	148(91.36%)	14(8.64%)	0.244843
NLRC5	158(95.18%)	8(4.82%)	148(91.36%)	14(8.64%)	0.244843
PCDHGA5	158(95.18%)	8(4.82%)	148(91.36%)	14(8.64%)	0.244843
NOS1	158(95.18%)	8(4.82%)	148(91.36%)	14(8.64%)	0.244843
WDR17	158(95.18%)	8(4.82%)	148(91.36%)	14(8.64%)	0.244843
TENM1	152(91.57%)	14(8.43%)	141(87.04%)	21(12.96%)	0.250362
KRAS	86(51.81%)	80(48.19%)	95(58.64%)	67(41.36%)	0.257047
MUC16	127(76.51%)	39(23.49%)	114(70.37%)	48(29.63%)	0.257054
MAGEC1	157(94.58%)	9(5.42%)	147(90.74%)	15(9.26%)	0.261742
DMXL1	157(94.58%)	9(5.42%)	147(90.74%)	15(9.26%)	0.261742
DSEL	157(94.58%)	9(5.42%)	147(90.74%)	15(9.26%)	0.261742
AFF2	157(94.58%)	9(5.42%)	147(90.74%)	15(9.26%)	0.261742
PTPN13	157(94.58%)	9(5.42%)	147(90.74%)	15(9.26%)	0.261742
UBR3	157(94.58%)	9(5.42%)	147(90.74%)	15(9.26%)	0.261742
MYH7	157(94.58%)	9(5.42%)	147(90.74%)	15(9.26%)	0.261742
EPPK1	161(96.99%)	5(3.01%)	152(93.83%)	10(6.17%)	0.268863
ANKRD30B	161(96.99%)	5(3.01%)	152(93.83%)	10(6.17%)	0.268863
CCDC39	161(96.99%)	5(3.01%)	152(93.83%)	10(6.17%)	0.268863
ARID2	156(93.98%)	10(6.02%)	146(90.12%)	16(9.88%)	0.277123
ITPR1	156(93.98%)	10(6.02%)	146(90.12%)	16(9.88%)	0.277123
CNTNAP5	156(93.98%)	10(6.02%)	146(90.12%)	16(9.88%)	0.277123
SALL1	156(93.98%)	10(6.02%)	146(90.12%)	16(9.88%)	0.277123
ADAMTS16	156(93.98%)	10(6.02%)	146(90.12%)	16(9.88%)	0.277123
TMEM132D	156(93.98%)	10(6.02%)	146(90.12%)	16(9.88%)	0.277123
DYNC1H1	155(93.37%)	11(6.63%)	145(89.51%)	17(10.49%)	0.291162
ZDBF2	155(93.37%)	11(6.63%)	145(89.51%)	17(10.49%)	0.291162
SRCAP	155(93.37%)	11(6.63%)	145(89.51%)	17(10.49%)	0.291162
RNF213	155(93.37%)	11(6.63%)	145(89.51%)	17(10.49%)	0.291162
NEB	147(88.55%)	19(11.45%)	136(83.95%)	26(16.05%)	0.293228
DNAH14	160(96.39%)	6(3.61%)	151(93.21%)	11(6.79%)	0.294629
ABCA10	160(96.39%)	6(3.61%)	151(93.21%)	11(6.79%)	0.294629
ZFYVE26	160(96.39%)	6(3.61%)	151(93.21%)	11(6.79%)	0.294629
COL4A5	160(96.39%)	6(3.61%)	151(93.21%)	11(6.79%)	0.294629
ADAMTS5	160(96.39%)	6(3.61%)	151(93.21%)	11(6.79%)	0.294629
TCF20	160(96.39%)	6(3.61%)	151(93.21%)	11(6.79%)	0.294629
FBXL7	160(96.39%)	6(3.61%)	151(93.21%)	11(6.79%)	0.294629
ADGRB3	160(96.39%)	6(3.61%)	151(93.21%)	11(6.79%)	0.294629
ARHGAP35	160(96.39%)	6(3.61%)	151(93.21%)	11(6.79%)	0.294629
PTPN14	160(96.39%)	6(3.61%)	151(93.21%)	11(6.79%)	0.294629
SPTBN5	160(96.39%)	6(3.61%)	151(93.21%)	11(6.79%)	0.294629
RALGAPA1	160(96.39%)	6(3.61%)	151(93.21%)	11(6.79%)	0.294629
ITIH6	160(96.39%)	6(3.61%)	151(93.21%)	11(6.79%)	0.294629
NPAP1	160(96.39%)	6(3.61%)	151(93.21%)	11(6.79%)	0.294629
NUP98	160(96.39%)	6(3.61%)	151(93.21%)	11(6.79%)	0.294629
PTPRS	154(92.77%)	12(7.23%)	144(88.89%)	18(11.11%)	0.30401
PKHD1	153(92.17%)	13(7.83%)	143(88.27%)	19(11.73%)	0.315799
DOCK2	153(92.17%)	13(7.83%)	143(88.27%)	19(11.73%)	0.315799
ERBB4	153(92.17%)	13(7.83%)	143(88.27%)	19(11.73%)	0.315799
COL11A1	153(92.17%)	13(7.83%)	143(88.27%)	19(11.73%)	0.315799
CLUH	159(95.78%)	7(4.22%)	150(92.59%)	12(7.41%)	0.317167
POSTN	159(95.78%)	7(4.22%)	150(92.59%)	12(7.41%)	0.317167
GRM7	159(95.78%)	7(4.22%)	150(92.59%)	12(7.41%)	0.317167
CD163	159(95.78%)	7(4.22%)	150(92.59%)	12(7.41%)	0.317167
CELSR3	159(95.78%)	7(4.22%)	150(92.59%)	12(7.41%)	0.317167
ATR	159(95.78%)	7(4.22%)	150(92.59%)	12(7.41%)	0.317167
MYO18A	159(95.78%)	7(4.22%)	150(92.59%)	12(7.41%)	0.317167
ALS2	159(95.78%)	7(4.22%)	150(92.59%)	12(7.41%)	0.317167
PLCE1	159(95.78%)	7(4.22%)	150(92.59%)	12(7.41%)	0.317167
AXIN2	159(95.78%)	7(4.22%)	150(92.59%)	12(7.41%)	0.317167
FLT4	159(95.78%)	7(4.22%)	150(92.59%)	12(7.41%)	0.317167
PTEN	159(95.78%)	7(4.22%)	150(92.59%)	12(7.41%)	0.317167
MAP2K4	159(95.78%)	7(4.22%)	150(92.59%)	12(7.41%)	0.317167
SYCP2	159(95.78%)	7(4.22%)	150(92.59%)	12(7.41%)	0.317167
MAGI2	159(95.78%)	7(4.22%)	150(92.59%)	12(7.41%)	0.317167
NUMA1	159(95.78%)	7(4.22%)	150(92.59%)	12(7.41%)	0.317167
ARHGAP31	159(95.78%)	7(4.22%)	150(92.59%)	12(7.41%)	0.317167
KDM6B	159(95.78%)	7(4.22%)	150(92.59%)	12(7.41%)	0.317167
TTN	88(53.01%)	78(46.99%)	76(46.91%)	86(53.09%)	0.320243
FRY	151(90.96%)	15(9.04%)	141(87.04%)	21(12.96%)	0.336637
PCDH15	151(90.96%)	15(9.04%)	141(87.04%)	21(12.96%)	0.336637
DNAH7	151(90.96%)	15(9.04%)	141(87.04%)	21(12.96%)	0.336637
CDH18	158(95.18%)	8(4.82%)	149(91.98%)	13(8.02%)	0.337021
DCLK1	158(95.18%)	8(4.82%)	149(91.98%)	13(8.02%)	0.337021
MYLK	158(95.18%)	8(4.82%)	149(91.98%)	13(8.02%)	0.337021
ALK	158(95.18%)	8(4.82%)	149(91.98%)	13(8.02%)	0.337021
GUF1	158(95.18%)	8(4.82%)	149(91.98%)	13(8.02%)	0.337021
PTCHD2	158(95.18%)	8(4.82%)	149(91.98%)	13(8.02%)	0.337021
ALPK2	158(95.18%)	8(4.82%)	149(91.98%)	13(8.02%)	0.337021
ZNF423	157(94.58%)	9(5.42%)	148(91.36%)	14(8.64%)	0.354626
CACNA1B	157(94.58%)	9(5.42%)	148(91.36%)	14(8.64%)	0.354626
BRWD3	157(94.58%)	9(5.42%)	148(91.36%)	14(8.64%)	0.354626
ADAMTS12	157(94.58%)	9(5.42%)	148(91.36%)	14(8.64%)	0.354626
ZNF518A	162(97.59%)	4(2.41%)	154(95.06%)	8(4.94%)	0.354745
POLD1	162(97.59%)	4(2.41%)	154(95.06%)	8(4.94%)	0.354745
ADAMTSL3	156(93.98%)	10(6.02%)	147(90.74%)	15(9.26%)	0.370329
MDGA2	156(93.98%)	10(6.02%)	147(90.74%)	15(9.26%)	0.370329
NRXN2	156(93.98%)	10(6.02%)	147(90.74%)	15(9.26%)	0.370329
KANSL1	156(93.98%)	10(6.02%)	147(90.74%)	15(9.26%)	0.370329
APC	39(23.49%)	127(76.51%)	46(28.4%)	116(71.6%)	0.375194
DMD	146(87.95%)	20(12.05%)	136(83.95%)	26(16.05%)	0.376515
PDZD2	155(93.37%)	11(6.63%)	146(90.12%)	16(9.88%)	0.384411
PLXNA1	155(93.37%)	11(6.63%)	146(90.12%)	16(9.88%)	0.384411
NALCN	155(93.37%)	11(6.63%)	146(90.12%)	16(9.88%)	0.384411
TPTE	161(96.99%)	5(3.01%)	153(94.44%)	9(5.56%)	0.386401
XRN1	161(96.99%)	5(3.01%)	153(94.44%)	9(5.56%)	0.386401
RGS22	161(96.99%)	5(3.01%)	153(94.44%)	9(5.56%)	0.386401
MAP1B	154(92.77%)	12(7.23%)	145(89.51%)	17(10.49%)	0.397098
PKHD1L1	154(92.77%)	12(7.23%)	145(89.51%)	17(10.49%)	0.397098
AKAP12	154(92.77%)	12(7.23%)	145(89.51%)	17(10.49%)	0.397098
TNR	154(92.77%)	12(7.23%)	145(89.51%)	17(10.49%)	0.397098
FREM2	154(92.77%)	12(7.23%)	145(89.51%)	17(10.49%)	0.397098
PIK3CG	160(96.39%)	6(3.61%)	152(93.83%)	10(6.17%)	0.412748
CNTLN	160(96.39%)	6(3.61%)	152(93.83%)	10(6.17%)	0.412748
PRR12	160(96.39%)	6(3.61%)	152(93.83%)	10(6.17%)	0.412748
SBF1	160(96.39%)	6(3.61%)	152(93.83%)	10(6.17%)	0.412748
ARHGAP22	160(96.39%)	6(3.61%)	152(93.83%)	10(6.17%)	0.412748
FRMPD4	160(96.39%)	6(3.61%)	152(93.83%)	10(6.17%)	0.412748
FGD6	160(96.39%)	6(3.61%)	152(93.83%)	10(6.17%)	0.412748
PLEKHA5	160(96.39%)	6(3.61%)	152(93.83%)	10(6.17%)	0.412748
ADAMTSL4	160(96.39%)	6(3.61%)	152(93.83%)	10(6.17%)	0.412748
BOC	160(96.39%)	6(3.61%)	152(93.83%)	10(6.17%)	0.412748
PCDH20	160(96.39%)	6(3.61%)	152(93.83%)	10(6.17%)	0.412748
AHNAK	152(91.57%)	14(8.43%)	143(88.27%)	19(11.73%)	0.419001
PAPPA2	152(91.57%)	14(8.43%)	143(88.27%)	19(11.73%)	0.419001
NPAT	159(95.78%)	7(4.22%)	151(93.21%)	11(6.79%)	0.435023
DMBT1	159(95.78%)	7(4.22%)	151(93.21%)	11(6.79%)	0.435023
ADCY1	159(95.78%)	7(4.22%)	151(93.21%)	11(6.79%)	0.435023
JPH3	159(95.78%)	7(4.22%)	151(93.21%)	11(6.79%)	0.435023
CARD11	159(95.78%)	7(4.22%)	151(93.21%)	11(6.79%)	0.435023
KNTC1	159(95.78%)	7(4.22%)	151(93.21%)	11(6.79%)	0.435023
PHF20L1	159(95.78%)	7(4.22%)	151(93.21%)	11(6.79%)	0.435023
PRDM2	159(95.78%)	7(4.22%)	151(93.21%)	11(6.79%)	0.435023
MYH7B	159(95.78%)	7(4.22%)	151(93.21%)	11(6.79%)	0.435023
PLEKHA6	159(95.78%)	7(4.22%)	151(93.21%)	11(6.79%)	0.435023
PLXNA3	159(95.78%)	7(4.22%)	151(93.21%)	11(6.79%)	0.435023
TRPA1	159(95.78%)	7(4.22%)	151(93.21%)	11(6.79%)	0.435023
PARP14	159(95.78%)	7(4.22%)	151(93.21%)	11(6.79%)	0.435023
SGSM1	159(95.78%)	7(4.22%)	151(93.21%)	11(6.79%)	0.435023
TLL1	159(95.78%)	7(4.22%)	151(93.21%)	11(6.79%)	0.435023
IRS4	159(95.78%)	7(4.22%)	151(93.21%)	11(6.79%)	0.435023
GRIK3	159(95.78%)	7(4.22%)	151(93.21%)	11(6.79%)	0.435023
SLX4	159(95.78%)	7(4.22%)	151(93.21%)	11(6.79%)	0.435023
PPP1R3A	159(95.78%)	7(4.22%)	151(93.21%)	11(6.79%)	0.435023
NAA15	159(95.78%)	7(4.22%)	151(93.21%)	11(6.79%)	0.435023
THSD7A	159(95.78%)	7(4.22%)	151(93.21%)	11(6.79%)	0.435023
PTCH1	159(95.78%)	7(4.22%)	151(93.21%)	11(6.79%)	0.435023
ABCB5	159(95.78%)	7(4.22%)	151(93.21%)	11(6.79%)	0.435023
CCDC141	159(95.78%)	7(4.22%)	151(93.21%)	11(6.79%)	0.435023
ASXL1	159(95.78%)	7(4.22%)	151(93.21%)	11(6.79%)	0.435023
SAMD9L	158(95.18%)	8(4.82%)	150(92.59%)	12(7.41%)	0.454102
KIF1A	158(95.18%)	8(4.82%)	150(92.59%)	12(7.41%)	0.454102
PRDM10	158(95.18%)	8(4.82%)	150(92.59%)	12(7.41%)	0.454102
MYH3	158(95.18%)	8(4.82%)	150(92.59%)	12(7.41%)	0.454102
NBAS	158(95.18%)	8(4.82%)	150(92.59%)	12(7.41%)	0.454102
LPA	158(95.18%)	8(4.82%)	150(92.59%)	12(7.41%)	0.454102
ATAD5	157(94.58%)	9(5.42%)	149(91.98%)	13(8.02%)	0.470621
SFMBT2	157(94.58%)	9(5.42%)	149(91.98%)	13(8.02%)	0.470621
PREX1	157(94.58%)	9(5.42%)	149(91.98%)	13(8.02%)	0.470621
SEC16A	157(94.58%)	9(5.42%)	149(91.98%)	13(8.02%)	0.470621
ERICH3	157(94.58%)	9(5.42%)	149(91.98%)	13(8.02%)	0.470621
CADPS	157(94.58%)	9(5.42%)	149(91.98%)	13(8.02%)	0.470621
ADGRL3	157(94.58%)	9(5.42%)	149(91.98%)	13(8.02%)	0.470621
ASTN1	157(94.58%)	9(5.42%)	149(91.98%)	13(8.02%)	0.470621
KIAA2022	157(94.58%)	9(5.42%)	149(91.98%)	13(8.02%)	0.470621
SORCS1	157(94.58%)	9(5.42%)	149(91.98%)	13(8.02%)	0.470621
EML5	157(94.58%)	9(5.42%)	149(91.98%)	13(8.02%)	0.470621
PTPRQ	157(94.58%)	9(5.42%)	149(91.98%)	13(8.02%)	0.470621
GRIA1	157(94.58%)	9(5.42%)	149(91.98%)	13(8.02%)	0.470621
SCAF4	157(94.58%)	9(5.42%)	149(91.98%)	13(8.02%)	0.470621
NOL6	157(94.58%)	9(5.42%)	149(91.98%)	13(8.02%)	0.470621
SPTBN1	157(94.58%)	9(5.42%)	149(91.98%)	13(8.02%)	0.470621
MUC4	144(86.75%)	22(13.25%)	135(83.33%)	27(16.67%)	0.476346
CSMD1	143(86.14%)	23(13.86%)	134(82.72%)	28(17.28%)	0.481234
ABCA4	156(93.98%)	10(6.02%)	148(91.36%)	14(8.64%)	0.485055
MTCL1	156(93.98%)	10(6.02%)	148(91.36%)	14(8.64%)	0.485055
WBSCR17	155(93.37%)	11(6.63%)	147(90.74%)	15(9.26%)	0.497767
CACNA1D	155(93.37%)	11(6.63%)	147(90.74%)	15(9.26%)	0.497767
PCDH10	155(93.37%)	11(6.63%)	147(90.74%)	15(9.26%)	0.497767
TTK	155(93.37%)	11(6.63%)	155(95.68%)	7(4.32%)	0.5002
NRXN1	154(92.77%)	12(7.23%)	146(90.12%)	16(9.88%)	0.509037
NIPBL	153(92.17%)	13(7.83%)	145(89.51%)	17(10.49%)	0.519085
ATP10A	153(92.17%)	13(7.83%)	145(89.51%)	17(10.49%)	0.519085
KCNQ3	154(92.77%)	12(7.23%)	154(95.06%)	8(4.94%)	0.524761
PLXNB3	154(92.77%)	12(7.23%)	154(95.06%)	8(4.94%)	0.524761
PIK3CA	120(72.29%)	46(27.71%)	111(68.52%)	51(31.48%)	0.530579
HNRNPL	161(96.99%)	5(3.01%)	154(95.06%)	8(4.94%)	0.541236
ACIN1	161(96.99%)	5(3.01%)	154(95.06%)	8(4.94%)	0.541236
SOX9	148(89.16%)	18(10.84%)	140(86.42%)	22(13.58%)	0.556152
ARMC4	160(96.39%)	6(3.61%)	153(94.44%)	9(5.56%)	0.563926
CABIN1	160(96.39%)	6(3.61%)	153(94.44%)	9(5.56%)	0.563926
PIK3C2G	160(96.39%)	6(3.61%)	153(94.44%)	9(5.56%)	0.563926
PCDHA1	160(96.39%)	6(3.61%)	153(94.44%)	9(5.56%)	0.563926
KIAA1755	160(96.39%)	6(3.61%)	153(94.44%)	9(5.56%)	0.563926
POTEE	160(96.39%)	6(3.61%)	153(94.44%)	9(5.56%)	0.563926
BRINP3	152(91.57%)	14(8.43%)	152(93.83%)	10(6.17%)	0.565919
ALPK3	159(95.78%)	7(4.22%)	152(93.83%)	10(6.17%)	0.582435
ADCY5	159(95.78%)	7(4.22%)	152(93.83%)	10(6.17%)	0.582435
COL19A1	159(95.78%)	7(4.22%)	152(93.83%)	10(6.17%)	0.582435
LRRC16A	159(95.78%)	7(4.22%)	152(93.83%)	10(6.17%)	0.582435
BCORL1	159(95.78%)	7(4.22%)	152(93.83%)	10(6.17%)	0.582435
HTT	159(95.78%)	7(4.22%)	152(93.83%)	10(6.17%)	0.582435
HECW2	159(95.78%)	7(4.22%)	152(93.83%)	10(6.17%)	0.582435
UBA6	159(95.78%)	7(4.22%)	152(93.83%)	10(6.17%)	0.582435
ATP2B2	159(95.78%)	7(4.22%)	152(93.83%)	10(6.17%)	0.582435
TNKS1BP1	159(95.78%)	7(4.22%)	152(93.83%)	10(6.17%)	0.582435
CACNA1I	159(95.78%)	7(4.22%)	152(93.83%)	10(6.17%)	0.582435
TLN1	159(95.78%)	7(4.22%)	152(93.83%)	10(6.17%)	0.582435
KCNQ5	158(95.18%)	8(4.82%)	151(93.21%)	11(6.79%)	0.597823
ITGA7	158(95.18%)	8(4.82%)	151(93.21%)	11(6.79%)	0.597823
NPHS1	158(95.18%)	8(4.82%)	151(93.21%)	11(6.79%)	0.597823
[truncated: 133 more rows]

## Sheet: S8
Immunetherapy in low -and high- risk group using TIDE online website
[truncated: 489 more rows]
